# Supplementary material for: Oxidative cycloaddition and cross-coupling processes on unactivated benzene derivatives
Source: Royal Society of Chemistry journal article supplement (doi:10.1039/c2sc22318j), 2013-01-01

# Oxidative Cycloaddition and Cross-Coupling Processes on Unactivated Benzene Derivatives

Guillaume Jacquemot, Marc-André Ménard, Chloé L'Homme and Sylvain Canesi\*

*Laboratoire de Méthodologie et Synthèse de Produit Naturels.*  
*Université du Québec à Montréal, C.P.8888, Succ. Centre-Ville, Montréal. H3C 3P8,*  
*Québec, Canada.*

## Supporting Information

### Table of Contents

|                                                                             |              |
|-----------------------------------------------------------------------------|--------------|
| 1. General information                                                      | SI-2         |
| 2. Experimental procedures                                                  | SI-2-SI-15   |
| 3. Copies of $^1\text{H}$ and $^{13}\text{C}$ NMR spectra for all compounds | SI-15-SI-121 |

## I. General information and materials

Unless otherwise indicated,  $^1\text{H}$  and  $^{13}\text{C}$  NMR spectra were recorded at 300 and 75 MHz, respectively, in  $\text{CDCl}_3$  solutions. Chemical shifts are reported in ppm on the  $\delta$  scale. Multiplicities are described as s (singlet), d (doublet), dd, ddd, etc. (doublet of doublets, doublet of doublets of doublets, etc.), t (triplet), q (quartet), p (pentuplet), m (multiplet), and further qualified as app (apparent) br (broad) c (complex). Coupling constants,  $J$ , are reported in Hz. IR spectra ( $\text{cm}^{-1}$ ) were recorded from thin films. Mass spectra ( $m/e$ ) were measured in the electrospray (ESI) mode.

## II. Experimental procedures

### General procedure for the formation of cycloadduct 11:

A solution of hypervalent iodine (0.32 mmol, 1.6 equiv.) in  $(\text{CF}_3)_2\text{CHOH}$  ("HFIP", 0.35 ml) was added dropwise on 30 second to a vigorously stirred solution of phenol **9** (0.20 mmol, 1 equiv.) and the corresponding aromatic compound (10 equiv.) in HFIP/DCM (2:1; ml) at  $-4^\circ\text{C}$ . The mixture was then stirred for 30 seconds and quenched with  $\text{NaHCO}_3$ . The phases were separated and the aqueous phase extracted with EtOAc. The organic phases were dried over  $\text{Na}_2\text{SO}_4$ , filtered and concentrated under vacuum. The residue was purified by silica gel chromatography with a mixture of ethyl acetate/hexane to give the corresponding cycloaddition product **11**.

**4a-iodo-8-(2-(phenylsulfonyl)ethyl)-4a,9b-dihydrodibenzo[b,d]furan (11a-g or 12a):** Pale yellow oil: 0.032 mmol, 14.8 mg, 34-51% yield;  $^1\text{H}$  NMR (300 MHz,  $\text{CDCl}_3$ )  $\delta$  7.94 (d,  $J = 8.0$  Hz, 2H), 7.69 – 7.54 (m, 4H), 7.49 (s, 1H), 6.91 (d,  $J = 8.1$  Hz, 1H), 6.73 – 6.66 (m, 2H), 6.02 (dd,  $J = 9.6, 4.4$  Hz, 1H), 5.82 (dd,  $J = 9.6, 6.1$  Hz, 1H), 5.36 (dd,  $J = 11.3, 4.4$  Hz, 1H), 4.35 (d,  $J = 11.3$  Hz, 1H), 3.40 – 3.33 (m, 2H), 3.08 – 3.00 (m, 2H);  $^{13}\text{C}$  NMR (75 MHz,  $\text{CDCl}_3$ )  $\delta$  157.3, 139.3, 133.9, 133.3, 129.5, 128.9, 128.2, 128.1, 126.9, 126.6, 121.9, 109.8, 101.15, 81.3, 58.0, 49.9, 28.5; HRMS (ESI): Calc. for  $\text{C}_{20}\text{H}_{18}\text{IO}_3\text{S}$  ( $\text{M}+\text{H}$ ) $^+$ : 465.0016; found: 465.0011.

**4a-iodo-8-(2-(propylsulfonyl)ethyl)-4a,9b-dihydrodibenzo[b,d]furan (11h):** Pale yellow oil: 0.037 mmol, 16.2 mg, 55% yield;  $^1\text{H}$  NMR (300 MHz,  $\text{CDCl}_3$ )  $\delta$  7.60 (s, 1H), 7.04 (dd,  $J = 8.2, 1.7$  Hz, 1H), 6.79 (d,  $J = 8.2$  Hz, 1H), 6.70 (dd,  $J = 6.1, 1.7$  Hz, 1H), 6.05 (dd,  $J = 9.6, 4.4$  Hz, 1H), 5.84 (dd,  $J = 9.6, 6.1$  Hz, 1H), 5.39 (dd,  $J = 11.2, 4.4$  Hz, 1H), 4.40 (d,  $J = 11.2$  Hz, 1H), 3.25 – 3.09 (m, 4H), 2.91 – 2.84 (m, 2H), 1.92 – 1.79 (sx,  $J = 7.6$  Hz, 2H), 1.04 (t,  $J = 7.4$  Hz, 3H);  $^{13}\text{C}$  NMR (75 MHz,  $\text{CDCl}_3$ )  $\delta$  157.5, 133.3, 129.7, 129.1, 128.3, 126.9, 126.8, 121.9, 110.0, 101.2, 81.4, 55.2, 54.7, 49.9, 27.9, 16.0, 13.3; HRMS (ESI): Calc. for  $\text{C}_{17}\text{H}_{20}\text{IO}_3\text{S}$  (M+H) $^+$ : 431.0172; found: 431.0171.

**4a-iodo-8-(2-((4-methoxyphenyl)sulfonyl)ethyl)-4a,9b-dihydrodibenzo[b,d]furan (11i):** Pale yellow oil: 0.048 mmol, 24.0 mg, 48% yield;  $^1\text{H}$  NMR (300 MHz,  $\text{CDCl}_3$ )  $\delta$  7.85 (d,  $J = 8.8$  Hz, 2H), 7.48 (s, 1H), 7.01 (d,  $J = 8.9$  Hz, 2H), 6.90 (d,  $J = 8.1$  Hz, 1H), 6.71 (d,  $J = 8.2$  Hz, 1H), 6.67 (dd,  $J = 6.2, 1.7$  Hz, 1H), 6.02 (dd,  $J = 9.6, 4.4$  Hz, 1H), 5.82 (dd,  $J = 9.6, 6.1$  Hz, 1H), 5.36 (dd,  $J = 11.2, 4.4$  Hz, 1H), 4.34 (d,  $J = 11.1$  Hz, 1H), 3.88 (s, 3H), 3.37 – 3.30 (m, 2H), 3.04 – 2.97 (m, 2H);  $^{13}\text{C}$  NMR (75 MHz,  $\text{CDCl}_3$ )  $\delta$  163.9, 157.2, 133.2, 130.8, 130.4, 129.6, 128.9, 128.0, 126.8, 126.1, 121.9, 114.7, 109.8, 101.2, 81.3, 58.3, 55.8, 49.9, 28.7; HRMS (ESI): Calc. for  $\text{C}_{21}\text{H}_{20}\text{IO}_4\text{S}$  (M+H) $^+$ : 495.0121; found: 495.014.

**4a-iodo-8-(2-((4-nitrophenyl)sulfonyl)ethyl)-4a,9b-dihydrodibenzo[b,d]furan (11j):** Pale yellow oil: 0.071 mmol, 36.4 mg, 41% yield;  $^1\text{H}$  NMR (300 MHz,  $\text{CDCl}_3$ )  $\delta$  8.34 (d,  $J = 8.7$  Hz, 2H), 8.07 (dd,  $J = 7.5, 5.7$  Hz, 2H), 7.45 (s, 1H), 6.90 (d,  $J = 8.3$  Hz, 1H), 6.66 (dd,  $J = 10.9, 4.9$  Hz, 2H), 6.00 (dd,  $J = 9.6, 4.3$  Hz, 1H), 5.81 (dd,  $J = 9.6, 6.1$  Hz, 1H), 5.36 (dd,  $J = 11.4, 4.3$  Hz, 1H), 4.33 (d,  $J = 11.3$  Hz, 1H), 3.45 (dd,  $J = 9.4, 6.5$  Hz, 2H), 3.07 (dd,  $J = 9.4, 6.6$  Hz, 2H);  $^{13}\text{C}$  NMR (75 MHz,  $\text{CDCl}_3$ )  $\delta$  157.4, 150.9, 145.0, 133.3, 129.7, 129.1, 128.6, 128.2, 126.7, 126.4, 124.5, 122.0, 109.9, 100.7, 81.4, 57.9, 49.8, 28.5; HRMS (ESI): Calc. for  $\text{C}_{20}\text{H}_{17}\text{INO}_5\text{S}$  (M+H) $^+$ : 509.9867; found: 509.9878.

**2-((2-(5a-iodo-5a,9a-dihydrodibenzo[b,d]furan-2-yl)ethyl)sulfonyl)benzo[d]thiazole (11k):** Pale yellow oil: 0.019 mmol, 10.2 mg, 45% yield;  $^1\text{H}$  NMR (300 MHz,  $\text{CDCl}_3$ )  $\delta$  8.21 (d,  $J = 7.6$  Hz, 1H), 8.02 (d,  $J = 7.4$  Hz, 1H), 7.68 – 7.56 (m, 2H), 7.52 (s, 1H), 6.98 (dd,  $J = 8.2, 1.7$  Hz, 1H), 6.70 (d,  $J = 8.2$  Hz, 1H), 6.66 (dd,  $J = 6.1, 1.8$  Hz, 1H), 6.00 (dd,  $J = 9.6, 4.4$  Hz, 1H), 5.81 (dd,  $J = 9.6, 6.1$  Hz, 1H), 5.28 (dd,  $J = 11.3, 4.4$  Hz, 1H), 4.26 (d,  $J = 11.4$  Hz, 1H), 3.81 (td,  $J = 7.2, 3.2$  Hz, 2H), 3.24 – 3.16 (m, 2H);  $^{13}\text{C}$  NMR (75 MHz,  $\text{CDCl}_3$ )  $\delta$  166.0, 157.4, 152.8, 137.0, 133.2, 129.2, 128.9, 128.2, 128.1, 127.8, 126.8, 126.7, 125.7, 122.5,

121.9, 109.8, 101.1, 81.3, 56.4, 49.8, 28.4; HRMS (ESI): Calc. for  $C_{21}H_{17}INO_3S_2$  (M+H)<sup>+</sup>: 521.9689; found: 521.9692.

#### General procedure for the formation of cycloadduct **12**:

A solution of bis(*tert*-butylcarbonyloxy)iodobenzene (0.32 mmol, 1.6 equiv.) in  $(CF_3)_2CHOH$  ("HFIP", 0.35 ml) was added dropwise on 30 second to a vigorously stirred solution of phenol **9** (0.20 mmol, 1 equiv.) and the corresponding aromatic compound (2.00 mmol, 10.0 equiv.) in HFIP/DCM (2:1; ml) at -4 °C. The mixture was then stirred for 30 seconds and quenched with  $NaHCO_3$ . The phases were separated and the aqueous phase extracted with EtOAc. The organic phases were dried over  $Na_2SO_4$ , filtered and concentrated under vacuum. The residue was purified by silica gel chromatography with a mixture of ethyl acetate/hexane to give the corresponding cycloaddition product **12**.

#### 4a-iodo-9b-methyl-8-(2-(phenylsulfonyl)ethyl)-4a,9b-dihydrodibenzo[b,d]furan (**12b**):

Pale yellow oil: 0.019 mmol, 9.2 mg, 54% yield; <sup>1</sup>H NMR (300 MHz,  $CDCl_3$ ) δ 7.94 (dd,  $J = 5.3, 3.3$  Hz, 2H), 7.70 – 7.53 (m, 4H), 7.48 (s, 1H), 6.90 (dd,  $J = 8.1, 1.7$  Hz, 1H), 6.70 (d,  $J = 8.2$  Hz, 1H), 6.56 (dd,  $J = 6.3, 1.7$  Hz, 1H), 5.57 (dd,  $J = 6.3, 1.5$  Hz, 1H), 5.16 (d,  $J = 11.0$  Hz, 1H), 4.34 (d,  $J = 10.9$  Hz, 1H), 3.41 – 3.33 (m, 2H), 3.08 – 3.00 (m, 2H), 1.92 (s, 3H); <sup>13</sup>C NMR (75 MHz,  $CDCl_3$ ) δ 157.3, 139.3, 133.9, 133.8, 131.3, 129.5, 129.4, 128.9, 128.7, 128.2, 126.5, 122.7, 109.7, 97.1, 85.3, 58.1, 50.3, 28.5, 20.6; HRMS (ESI): Calc. for  $C_{21}H_{20}IO_3S$  (M+H)<sup>+</sup>: 479.0172; found: 479.0165.

#### 9b-ethyl-4a-iodo-8-(2-(phenylsulfonyl)ethyl)-4a,9b-dihydrodibenzo[b,d]furan (**12c**):

Pale yellow oil: 0.020 mmol, 9.9 mg, 47% yield; <sup>1</sup>H NMR (300 MHz,  $CDCl_3$ ) δ 7.94 (d,  $J = 7.4$  Hz, 2H), 7.69 – 7.53 (m, 4H), 7.47 (s, 1H), 6.90 (d,  $J = 8.2$  Hz, 1H), 6.69 (d,  $J = 8.2$  Hz, 1H), 6.61 (d,  $J = 6.4$  Hz, 1H), 5.57 (d,  $J = 6.4$  Hz, 1H), 5.18 (d,  $J = 10.9$  Hz, 1H), 4.31 (d,  $J = 10.9$  Hz, 1H), 3.41 – 3.32 (m, 2H), 3.08 – 3.00 (m, 2H), 2.41 – 2.19 (m, 2H), 1.12 (t,  $J = 7.4$  Hz, 3H); <sup>13</sup>C NMR (75 MHz,  $CDCl_3$ ) δ 157.4, 139.3, 136.7, 133.9, 133.8, 129.5, 129.4, 128.8, 128.7, 128.2, 126.7, 121.0, 109.7, 97.7, 84.4, 58.1, 50.4, 28.5, 27.1, 11.7; HRMS (ESI): Calc. for  $C_{22}H_{22}IO_3S$  (M+H)<sup>+</sup>: 493.0329; found: 493.0319.

#### 4a-iodo-9b-isopropyl-8-(2-(phenylsulfonyl)ethyl)-4a,9b-dihydrodibenzo[b,d]furan (**12d**):

Pale yellow oil: 0.015 mmol, 7.7 mg, 40% yield; <sup>1</sup>H NMR (300 MHz,  $CDCl_3$ ) δ 7.96 (s,  $J = 7.3$  Hz, 2H), 7.70 – 7.55 (m, 5H), 7.44 (s, 1H), 6.89 (d,  $J = 8.3$  Hz, 1H), 6.69 (d,  $J = 8.1$  Hz,

1H), 6.63 (dd,  $J = 6.5, 1.9$  Hz, 1H), 5.62 (d,  $J = 6.2$  Hz, 1H), 5.22 (d,  $J = 10.4$  Hz, 1H), 4.24 (d,  $J = 10.1$  Hz, 1H), 3.39 – 3.30 (m, 2H), 3.07 – 3.00 (m, 2H), 2.56 (h,  $J = 6.5$  Hz, 1H), 1.14 (dd,  $J = 6.8, 2.0$  Hz, 6H);  $^{13}\text{C}$  NMR (75 MHz,  $\text{CDCl}_3$ )  $\delta$  157.6, 140.7, 139.3, 134.0, 133.9, 129.5, 129.4, 128.8, 128.7, 128.3, 126.8, 120.5, 109.7, 98.3, 83.4, 58.1, 50.6, 32.1, 28.6, 21.9, 21.1; HRMS (ESI): Calc. for  $\text{C}_{23}\text{H}_{24}\text{IO}_3\text{S}$  ( $\text{M}+\text{H}$ ) $^+$ : 507.0485; found: 507.0489.

**tert-butyl((5a-iodo-2-(2-(phenylsulfonyl)ethyl)-5a,9a-dihydrodibenzo[b,d]furan-9a-yl)methoxy)dimethylsilane (12e):** Pale yellow oil: 0.014 mmol, 8.8 mg, 35% yield;  $^1\text{H}$  NMR (300 MHz,  $\text{CDCl}_3$ )  $\delta$  7.94 (d,  $J = 7.2$  Hz, 2H), 7.71 – 7.53 (m, 4H), 7.48 (s, 1H), 6.93 – 6.87 (m, 1H), 6.67 (dd,  $J = 9.3, 4.8$  Hz, 2H), 5.81 (d,  $J = 6.4$  Hz, 1H), 5.25 (d,  $J = 10.9$  Hz, 1H), 4.31 (s, 2H), 3.41 – 3.32 (m, 2H), 3.09 – 2.99 (m, 2H), 0.91 (s, 9H), 0.09 (d,  $J = 2.1$  Hz, 6H);  $^{13}\text{C}$  NMR (75 MHz,  $\text{CDCl}_3$ )  $\delta$  157.4, 139.3, 137.8, 134.0, 133.9, 133.5, 129.5, 129.5, 129.0, 128.9, 128.5, 128.2, 126.7, 121.2, 109.7, 99.3, 81.7, 63.9, 58.1, 50.3, 28.5, 26.0, 18.5, -5.2, -5.3; HRMS (ESI): Calc. for  $\text{C}_{27}\text{H}_{34}\text{IO}_4\text{SSi}$  ( $\text{M}+\text{H}$ ) $^+$ : 609.0986; found: 609.0978.

**4a-iodo-8-(3-(phenylsulfonyl)propyl)-4a,9b-dihydrodibenzo[b,d]furan (12f):** Pale yellow oil: 0.013 mmol, 6.2 mg, 31% yield;  $^1\text{H}$  NMR (300 MHz,  $\text{CDCl}_3$ )  $\delta$  7.89 (d,  $J = 7.3$  Hz, 2H), 7.69 – 7.52 (m, 4H), 7.47 (s, 1H), 6.90 (d,  $J = 8.1$  Hz, 1H), 6.72 (d,  $J = 8.1$  Hz, 1H), 6.69 (dd,  $J = 6.1, 1.9$  Hz, 1H), 6.06 (dd,  $J = 9.7, 4.5$  Hz, 1H), 5.85 (dd,  $J = 9.6, 6.1$  Hz, 1H), 5.34 (dd,  $J = 11.1, 4.5$  Hz, 1H), 4.34 (d,  $J = 10.9$  Hz, 1H), 3.09 (dd,  $J = 8.7, 7.2$  Hz, 2H), 2.69 (t,  $J = 7.3$  Hz, 2H), 2.04 (dq,  $J = 11.3, 7.1$  Hz, 2H);  $^{13}\text{C}$  NMR (75 MHz,  $\text{CDCl}_3$ )  $\delta$  157.0, 139.4, 133.8, 133.3, 132.0, 129.4, 129.0, 128.2, 127.8, 127.0, 126.8, 121.8, 109.6, 102.0, 81.1, 55.6, 49.8, 33.8, 24.7; HRMS (ESI): Calc. for  $\text{C}_{21}\text{H}_{20}\text{IO}_3\text{S}$  ( $\text{M}+\text{H}$ ) $^+$ : 479.0172; found: 479.0182.

**8-(2-(phenylsulfonyl)ethyl)-4a,9b-dihydrodibenzo[b,d]furan (12g):** Pale yellow oil: 0.041 mmol, 14.2 mg, 40% yield;  $^1\text{H}$  NMR (300 MHz,  $\text{CDCl}_3$ )  $\delta$  7.92 (d,  $J = 7.2$  Hz, 2H), 7.70 – 7.52 (m, 4H), 6.98 (s, 1H), 6.83 (d,  $J = 8.0$  Hz, 1H), 6.70 (d,  $J = 8.2$  Hz, 1H), 6.12 (dd,  $J = 9.8, 5.5$  Hz, 1H), 5.97 – 5.88 (m, 2H), 5.77 (dd,  $J = 9.7, 3.3$  Hz, 1H), 5.42 (dd,  $J = 12.1, 4.6$  Hz, 1H), 4.17 (d,  $J = 12.0$  Hz, 1H), 3.33 (dd,  $J = 10.4, 6.2$  Hz, 2H), 2.99 (dd,  $J = 10.4, 6.3$  Hz, 2H);  $^{13}\text{C}$  NMR (75 MHz,  $\text{CDCl}_3$ )  $\delta$  157.4, 139.3, 133.9, 130.1, 129.8, 129.4, 128.2, 128.1, 127.6, 126.5, 124.6, 121.3, 121.2, 110.0, 78.7, 58.1, 40.8, 28.4; HRMS (ESI): Calc. for  $\text{C}_{20}\text{H}_{18}\text{O}_3\text{SNa}$  ( $\text{M}+\text{Na}$ ) $^+$ : 361.0869; found: 361.0860.

**10-(2-(phenylsulfonyl)ethyl)-6a,11b-dihydronaphtho[2,1-b]benzofuran (12h):** Pale yellow oil: 0.095 mmol, 37.1 mg, 72% yield;  $^1\text{H}$  NMR (300 MHz,  $\text{CDCl}_3$ )  $\delta$  7.89 (d,  $J = 7.3$  Hz, 2H), 7.68 – 7.49 (m, 5H), 7.38 – 7.19 (m, 4H), 7.07 (d,  $J = 7.2$  Hz, 1H), 6.87 – 6.79 (m, 2H), 6.72 (d,  $J = 8.1$  Hz, 1H), 6.48 (d,  $J = 8.8$  Hz, 1H), 5.85 – 5.76 (m, 2H), 4.64 (d,  $J = 10.5$  Hz, 1H), 3.33 – 3.23 (m, 2H), 2.98 – 2.89 (m, 2H);  $^{13}\text{C}$  NMR (75 MHz,  $\text{CDCl}_3$ )  $\delta$  157.2, 139.2, 133.8, 132.7, 130.6, 130.5, 129.8, 129.6, 129.4, 128.6, 128.5, 128.4, 128.2, 128.0, 127.7, 124.6, 124.5, 110.0, 81.4, 58.0, 43.7, 28.3; HRMS (ESI): Calc. for  $\text{C}_{24}\text{H}_{20}\text{O}_3\text{SNa}$  ( $\text{M}+\text{Na}$ ) $^+$ : 411.1025; found: 411.1028.

**2-(2-(phenylsulfonyl)ethyl)-6,11-dihydro-6,11-[1,2]benzenodibenzo[b,e]oxepine (13):**

A solution of bis(*tert*-butylcarbonyloxy)iodobenzene (0.17 mmol, 1.6 equiv.) in  $(\text{CF}_3)_2\text{CHOH}$  (“HFIP”, 0.35 ml) was added dropwise on 30 second to a vigorously stirred solution of phenol **9** (0.11 mmol, 1 equiv.) and the anthracene (0.55 mmol, 5.0 equiv.) in HFIP/DCM (2:1; ml) at  $-4$  °C. The mixture was then stirred for 30 seconds and quenched with  $\text{NaHCO}_3$ . The phases were separated and the aqueous phase extracted with EtOAc. The organic phases were dried over  $\text{Na}_2\text{SO}_4$ , filtered and concentrated under vacuum. The residue was purified by silica gel chromatography with a mixture of ethyl acetate/hexane to afford **13** in 58% yield (0.034 mmol, 14.8 mg).  $^1\text{H}$  NMR (300 MHz,  $\text{CDCl}_3$ )  $\delta$  7.85 (d,  $J = 7.2$  Hz, 2H), 7.62 – 7.54 (m, 2H), 7.53 – 7.42 (m, 5H), 7.38 – 7.32 (m, 2H), 7.25 – 7.22 (m, 2H), 6.93 (d,  $J = 2.2$  Hz, 1H), 6.71 (dd,  $J = 8.4, 2.2$  Hz, 1H), 6.44 (d,  $J = 8.3$  Hz, 1H), 5.88 (s,  $J = 6.6$  Hz, 1H), 4.51 (s, 1H), 3.33 – 3.24 (m, 2H), 2.95 – 2.87 (m, 2H);  $^{13}\text{C}$  NMR (75 MHz,  $\text{CDCl}_3$ )  $\delta$  151.7, 144.8, 139.3, 134.8, 133.7, 129.3, 129.3, 128.8, 128.7, 128.4, 128.1, 127.5, 127.4, 124.5, 120.3, 78.8, 57.8, 52.3, 28.0; HRMS (ESI): Calc. for  $\text{C}_{28}\text{H}_{23}\text{O}_3\text{S}$  ( $\text{M}+\text{H}$ ) $^+$ : 439.1362; found: 439.1353.

**7-(2-((4-methoxyphenyl)sulfonyl)ethyl)-3a,8b-dihydrofuro[3,2-b]benzofuran (14):**

A solution of bis(*tert*-butylcarbonyloxy)iodobenzene (0.08 mmol, 1.6 equiv.) in  $(\text{CF}_3)_2\text{CHOH}$  (“HFIP”, 0.35 ml) was added dropwise on 30 second to a vigorously stirred solution of phenol **9i** (0.05 mmol, 1 equiv.) and the furan (0.75 mmol, 15.0 equiv.) in TFE at  $-25$  °C. After completion the reaction was quenched with  $\text{NaHCO}_3$ . The phases were separated and the aqueous phase extracted with EtOAc. The organic phases were dried over  $\text{Na}_2\text{SO}_4$ , filtered and concentrated under vacuum. The residue was purified by silica gel chromatography with a mixture of ethyl acetate/hexane to afford **14** in 95% yield (0.047 mmol, 16.8 mg).  $^1\text{H}$  NMR (300 MHz,  $\text{CDCl}_3$ )  $\delta$  7.83 (d,  $J = 8.9$  Hz, 2H), 7.17 (d,  $J = 1.4$  Hz, 1H), 7.01 (d,  $J = 8.8$  Hz, 3H), 6.76 (d,  $J = 8.3$  Hz, 1H), 6.61 (d,  $J = 2.5$  Hz, 1H), 5.97 (s, 2H), 5.28 (t,  $J = 2.3$  Hz, 1H),

3.89 (s, 3H), 3.35 – 3.27 (m, 2H), 3.02 – 2.95 (m, 2H);  $^{13}\text{C}$  NMR (75 MHz,  $\text{CDCl}_3$ )  $\delta$  163.9, 158.5, 151.3, 131.7, 131.5, 130.6, 130.4, 130.1, 126.3, 125.4, 114.6, 111.2, 100.2, 89.4, 85.1, 58.2, 55.8, 28.5; HRMS (ESI): Calc. for  $\text{C}_{19}\text{H}_{18}\text{O}_5\text{SNa}$  ( $\text{M}+\text{Na}$ ) $^+$ : 381.0767; found: 381.0779.

**General procedure for the formation of cycloadduct 17:** A solution of bis(*tert*-butylcarbonyloxy)iodobenzene (0.22 mmol, 1.6 equiv.) in  $(\text{CF}_3)_2\text{CHOH}$  (“HFIP”, 0.35 ml) was added dropwise on 30 second to a vigorously stirred solution of sulfonamide **15** (0.14 mmol, 1 equiv.) and the corresponding aromatic compound (0.70 mmol, 5.0 equiv.) in HFIP/DCM (2:1; ml) at  $-4\text{ }^\circ\text{C}$ . The mixture was then stirred for 30 seconds and quenched with  $\text{NaHCO}_3$ . The phases were separated and the aqueous phase extracted with EtOAc. The organic phases were dried over  $\text{Na}_2\text{SO}_4$ , filtered and concentrated under vacuum. The residue was purified by silica gel chromatography with a mixture of ethyl acetate/hexane to give the corresponding cycloaddition product **17**.

**10-methyl-7-(methylsulfonyl)-7,11b-dihydro-6aH-benzo[c]carbazole (17a):** Pale yellow oil: 0.074 mmol, 23.3 mg, 61% yield;  $^1\text{H}$  NMR (300 MHz,  $\text{CDCl}_3$ )  $\delta$  7.38 – 7.27 (m, 4H), 7.05 (dd,  $J = 14.5, 7.5$  Hz, 2H), 6.75 (s, 1H), 6.43 (dd,  $J = 9.9, 2.1$  Hz, 1H), 5.83 (dd,  $J = 9.9, 2.5$  Hz, 1H), 5.53 (dt,  $J = 9.8, 2.3$  Hz, 1H), 4.64 (d,  $J = 9.8$  Hz, 1H), 2.94 (s, 3H), 2.24 (s, 3H);  $^{13}\text{C}$  NMR (75 MHz,  $\text{CDCl}_3$ )  $\delta$  137.6, 135.0, 135.0, 131.6, 130.7, 129.2, 128.8, 128.1, 128.1, 127.9, 126.5, 125.3, 116.2, 64.0, 43.9, 37.7, 21.1; HRMS (ESI): Calc. for  $\text{C}_{18}\text{H}_{18}\text{NO}_2\text{S}$  ( $\text{M}+\text{H}$ ) $^+$ : 312.1058; found: 312.1051.

**7-(ethylsulfonyl)-10-methyl-7,11b-dihydro-6aH-benzo[c]carbazole (17b):** Pale yellow oil: 0.081 mmol, 26.4 mg, 59% yield;  $^1\text{H}$  NMR (300 MHz,  $\text{CDCl}_3$ )  $\delta$  7.32 (dd,  $J = 9.1, 6.7$  Hz, 4H), 7.07 (d,  $J = 6.7$  Hz, 1H), 7.00 (d,  $J = 8.0$  Hz, 1H), 6.72 (s, 1H), 6.41 (dd,  $J = 9.9, 2.0$  Hz, 1H), 5.84 (dd,  $J = 9.9, 2.4$  Hz, 1H), 5.53 (dt,  $J = 9.8, 2.3$  Hz, 1H), 4.62 (d,  $J = 9.7$  Hz, 1H), 3.18 – 3.08 (m, 2H), 2.22 (s, 3H), 1.38 (t,  $J = 7.4$  Hz, 3H);  $^{13}\text{C}$  NMR (75 MHz,  $\text{CDCl}_3$ )  $\delta$  137.8, 134.7, 134.4, 131.6, 130.7, 129.3, 129.2, 128.6, 128.1, 128.0, 127.9, 127.1, 125.2, 115.4, 64.0, 45.9, 44.0, 21.1, 8.2; HRMS (ESI): Calc. for  $\text{C}_{19}\text{H}_{20}\text{NO}_2\text{S}$  ( $\text{M}+\text{H}$ ) $^+$ : 326.1209; found: 326.1207.

**10-methyl-7-tosyl-7,11b-dihydro-6aH-benzo[c]carbazole (17c):** Pale yellow oil: 0.030 mmol, 11.7 mg, 32% yield;  $^1\text{H}$  NMR (300 MHz,  $\text{CDCl}_3$ )  $\delta$  7.59 – 7.53 (m, 2H), 7.24 – 7.18

(m, 4H), 7.14 – 6.99 (m, 4H), 6.55 (s, 1H), 6.38 (d,  $J = 9.9$  Hz, 1H), 5.86 (dd,  $J = 9.8, 2.3$  Hz, 1H), 5.39 (d,  $J = 9.6$  Hz, 1H), 3.80 (d,  $J = 9.7$  Hz, 1H), 2.40 (s, 3H), 2.20 (s, 3H);  $^{13}\text{C}$  NMR (75 MHz,  $\text{CDCl}_3$ )  $\delta$  144.0, 138.0, 135.9, 135.9, 135.3, 131.6, 130.8, 129.9, 129.2, 129.1, 128.5, 128.0, 127.8, 127.8, 127.2, 127.1, 124.8, 118.1, 63.8, 43.4, 21.7, 21.2; HRMS (ESI): Calc. for  $\text{C}_{24}\text{H}_{22}\text{NO}_2\text{S}$  ( $\text{M}+\text{H}$ ) $^+$ : 388.1369; found: 388.1374.

**7-(isopropylsulfonyl)-10-methyl-7,11b-dihydro-6aH-benzo[c]carbazole (17d):** Pale yellow oil: 0.032 mmol, 11.0 mg, 38% yield;  $^1\text{H}$  NMR (300 MHz,  $\text{CDCl}_3$ )  $\delta$  7.38 – 7.27 (m, 5H), 7.06 (d,  $J = 6.8$  Hz, 1H), 6.97 (d,  $J = 8.1$  Hz, 1H), 6.70 (s, 1H), 6.41 (d,  $J = 9.9$  Hz, 1H), 5.86 (dd,  $J = 9.9, 2.2$  Hz, 1H), 5.51 (d,  $J = 9.7$  Hz, 1H), 4.63 (d,  $J = 9.7$  Hz, 1H), 3.40 (h,  $J = 6.8$  Hz, 1H), 2.21 (s, 3H), 1.45 – 1.37 (m, 6H);  $^{13}\text{C}$  NMR (75 MHz,  $\text{CDCl}_3$ )  $\delta$  138.4, 134.1, 133.7, 131.7, 129.3, 129.1, 128.5, 128.1, 128.0, 127.8, 127.5, 125.2, 114.7, 64.4, 54.0, 43.9, 21.1, 17.2, 16.8; HRMS (ESI): Calc. for  $\text{C}_{20}\text{H}_{22}\text{NO}_2\text{S}$  ( $\text{M}+\text{H}$ ) $^+$ : 340.1366; found: 340.1358.

**7-(benzylsulfonyl)-10-methyl-7,11b-dihydro-6aH-benzo[c]carbazole (17e):** Pale yellow oil: 0.048 mmol, 18.5 mg, 45% yield;  $^1\text{H}$  NMR (300 MHz,  $\text{CDCl}_3$ )  $\delta$  7.38 – 7.29 (m, 4H), 7.26 – 7.23 (m, 3H), 7.19 (t,  $J = 6.1$  Hz, 2H), 7.00 (dd,  $J = 9.8, 4.2$  Hz, 2H), 6.70 (s, 1H), 6.30 (dd,  $J = 9.9, 1.9$  Hz, 1H), 5.69 (dd,  $J = 9.9, 2.5$  Hz, 1H), 4.96 (dt,  $J = 10.1, 2.2$  Hz, 1H), 4.40 (d,  $J = 2.6$  Hz, 2H), 3.92 (d,  $J = 10.1$  Hz, 1H), 2.25 (s, 3H);  $^{13}\text{C}$  NMR (75 MHz,  $\text{CDCl}_3$ )  $\delta$  137.4, 134.9, 134.2, 131.8, 130.8, 130.7, 129.2, 129.2, 129.0, 128.6, 128.0, 127.9, 127.8, 127.7, 127.3, 125.2, 114.7, 64.7, 57.3, 43.2, 21.2; HRMS (ESI): Calc. for  $\text{C}_{24}\text{H}_{22}\text{NO}_2\text{S}$  ( $\text{M}+\text{H}$ ) $^+$ : 388.1369; found: 388.1381.

**10-chloro-7-(methylsulfonyl)-7,11b-dihydro-6aH-benzo[c]carbazole (17f):** Pale yellow oil: 0.043 mmol, 14.3 mg, 51% yield;  $^1\text{H}$  NMR (300 MHz,  $\text{CDCl}_3$ )  $\delta$  7.41 – 7.28 (m, 4H), 7.18 (ddd,  $J = 8.5, 2.0, 0.9$  Hz, 1H), 7.12 – 7.06 (m, 1H), 6.93 – 6.88 (m, 1H), 6.45 (dd,  $J = 9.9, 2.0$  Hz, 1H), 5.83 (dd,  $J = 9.9, 2.5$  Hz, 1H), 5.55 (dt,  $J = 9.8, 2.3$  Hz, 1H), 4.65 (d,  $J = 9.8$  Hz, 1H), 2.98 (s, 3H);  $^{13}\text{C}$  NMR (75 MHz,  $\text{CDCl}_3$ )  $\delta$  138.7, 137.0, 130.7, 130.6, 130.3, 130.1, 129.8, 129.1, 128.8, 128.5, 128.4, 128.1, 127.4, 125.9, 125.1, 117.1, 64.1, 43.8, 38.3; HRMS (ESI): Calc. for  $\text{C}_{17}\text{H}_{14}\text{NO}_2\text{SClNa}$  ( $\text{M}+\text{Na}$ ) $^+$ : 354.0326; found: 354.0320.

**10-isopropyl-7-(methylsulfonyl)-7,11b-dihydro-6aH-benzo[c]carbazole (17g):** Pale yellow oil: 0.023 mmol, 7.8 mg, 52% yield;  $^1\text{H}$  NMR (300 MHz,  $\text{CDCl}_3$ )  $\delta$  7.40 – 7.29 (m, 4H), 7.07



(d,  $J = 6.7$  Hz, 2H), 6.78 (s, 1H), 6.43 (dd,  $J = 9.9, 2.0$  Hz, 1H), 5.85 (dd,  $J = 9.9, 2.5$  Hz, 1H), 5.53 (dt,  $J = 9.9, 2.3$  Hz, 1H), 4.65 (d,  $J = 9.7$  Hz, 1H), 2.95 (s, 3H), 2.79 (h,  $J = 6.9$  Hz, 1H), 1.15 (dd,  $J = 6.9, 3.8$  Hz, 6H);  $^{13}\text{C}$  NMR (75 MHz,  $\text{CDCl}_3$ )  $\delta$  146.0, 137.8, 134.8, 131.7, 130.8, 129.2, 128.9, 128.1, 128.1, 128.0, 127.7, 126.5, 122.8, 116.1, 63.9, 43.9, 37.9, 33.9, 24.4, 24.0; HRMS (ESI): Calc. for  $\text{C}_{20}\text{H}_{22}\text{NO}_2\text{S}$  ( $\text{M}+\text{H}$ ) $^+$ : 340.1366; found: 340.1361.

**7-(methylsulfonyl)-10-propyl-7,11b-dihydro-6aH-benzo[c]carbazole (17h):** Pale yellow oil: 0.061 mmol, 20.7 mg, 51% yield;  $^1\text{H}$  NMR (300 MHz,  $\text{CDCl}_3$ )  $\delta$  7.39 – 7.28 (m, 4H), 7.05 (dd,  $J = 12.8, 7.5$  Hz, 2H), 6.74 (s, 1H), 6.43 (dd,  $J = 9.9, 2.0$  Hz, 1H), 5.84 (dd,  $J = 9.9, 2.5$  Hz, 1H), 5.53 (dt,  $J = 9.8, 2.3$  Hz, 1H), 4.64 (d,  $J = 9.8$  Hz, 1H), 2.95 (s, 3H), 2.51 – 2.43 (m, 2H), 1.53 (sx,  $J = 7.4$  Hz, 2H), 0.89 (t,  $J = 7.3$  Hz, 3H);  $^{13}\text{C}$  NMR (75 MHz,  $\text{CDCl}_3$ )  $\delta$  139.9, 137.8, 134.9, 131.6, 130.7, 129.2, 128.8, 128.7, 128.1, 128.1, 127.9, 126.5, 124.6, 116.1, 64.0, 43.9, 37.8, 37.8, 24.8, 14.0; HRMS (ESI): Calc. for  $\text{C}_{20}\text{H}_{22}\text{NO}_2\text{S}$  ( $\text{M}+\text{H}$ ) $^+$ : 340.1366; found: 340.1368.

**7-(methylsulfonyl)-10-(2-(phenylsulfonyl)ethyl)-7,11b-dihydro-6aH-benzo[c]carbazole (17i):** Pale yellow oil: 0.016 mmol, 7.6 mg, 54% yield;  $^1\text{H}$  NMR (300 MHz,  $\text{CDCl}_3$ )  $\delta$  7.88 (d,  $J = 7.2$  Hz, 2H), 7.68 – 7.49 (m, 5H), 7.39 – 7.28 (m, 5H), 7.08 (dd,  $J = 5.7, 2.4$  Hz, 1H), 6.95 (d,  $J = 8.2$  Hz, 1H), 6.71 (s, 1H), 6.42 (dd,  $J = 9.9, 2.0$  Hz, 1H), 5.81 (dd,  $J = 9.9, 2.5$  Hz, 1H), 5.52 (dt,  $J = 9.9, 2.3$  Hz, 1H), 4.60 (d,  $J = 9.8$  Hz, 1H), 3.29 – 3.20 (m, 3H), 2.99 – 2.91 (m, 2H), 2.95 (s, 3H);  $^{13}\text{C}$  NMR (75 MHz,  $\text{CDCl}_3$ )  $\delta$  139.2, 139.0, 135.6, 134.3, 134.0, 131.2, 130.6, 129.5, 129.2, 129.0, 128.7, 128.4, 128.2, 128.0, 126.2, 124.7, 116.3, 64.0, 57.6, 43.8, 38.2, 28.4; HRMS (ESI): Calc. for  $\text{C}_{25}\text{H}_{23}\text{NO}_4\text{SNa}$  ( $\text{M}+\text{Na}$ ) $^+$ : 488.0961; found: 488.0957.

**(7-(methylsulfonyl)-7,11b-dihydro-6aH-benzo[c]carbazol-10-yl)methanol (17j):** Pale yellow oil: 0.064 mmol, 21.0 mg, 53% yield;  $^1\text{H}$  NMR (300 MHz,  $\text{CDCl}_3$ )  $\delta$  7.44 (d,  $J = 8.1$  Hz, 1H), 7.37 – 7.29 (m, 3H), 7.21 (d,  $J = 7.9$  Hz, 1H), 7.07 (d,  $J = 7.6$  Hz, 1H), 6.98 (s, 1H), 6.43 (d,  $J = 9.9$  Hz, 1H), 5.84 (dd,  $J = 9.9, 2.2$  Hz, 1H), 5.56 (d,  $J = 9.9$  Hz, 1H), 4.66 (d,  $J = 9.9$  Hz, 1H), 4.56 (s, 2H), 2.97 (s, 3H);  $^{13}\text{C}$  NMR (75 MHz,  $\text{CDCl}_3$ )  $\delta$  190.9, 139.5, 137.8, 135.4, 131.8, 131.3, 130.6, 129.3, 128.9, 128.3, 128.3, 128.0, 127.8, 126.2, 123.7, 118.4, 116.0, 65.0, 60.6, 43.8, 38.1; HRMS (ESI): Calc. for  $\text{C}_{18}\text{H}_{17}\text{NO}_3\text{SNa}$  ( $\text{M}+\text{Na}$ ) $^+$ : 350.0821; found: 350.0811.

**2-(7-(methylsulfonyl)-7,11b-dihydro-6aH-benzo[c]carbazol-10-yl)ethanol (17k):** Pale yellow oil: 0.042 mmol, 14.2 mg, 62% yield;  $^1\text{H}$  NMR (300 MHz,  $\text{CDCl}_3$ )  $\delta$  7.44 (d,  $J = 8.1$  Hz, 1H), 7.39 – 7.31 (m, 3H), 7.12 (dd,  $J = 7.3, 3.0$  Hz, 2H), 6.84 (s, 1H), 6.47 (dd,  $J = 9.9, 2.0$  Hz, 1H), 5.88 (dd,  $J = 9.9, 2.5$  Hz, 1H), 5.58 (dt,  $J = 9.9, 2.3$  Hz, 1H), 4.69 (d,  $J = 9.9$  Hz, 1H), 3.81 (t,  $J = 6.5$  Hz, 2H), 3.01 (s, 3H), 2.79 (t,  $J = 6.5$  Hz, 2H);  $^{13}\text{C}$  NMR (75 MHz,  $\text{CDCl}_3$ )  $\delta$  138.5, 135.5, 135.3, 131.4, 130.7, 130.1, 129.3, 129.2, 128.9, 128.2, 128.2, 128.0, 126.3, 125.5, 125.3, 116.2, 64.0, 63.7, 43.8, 38.8, 38.1; HRMS (ESI): Calc. for  $\text{C}_{19}\text{H}_{19}\text{NO}_3\text{SNa}$  ( $\text{M}+\text{Na}$ ) $^+$ : 364.0978; found: 364.0972.

**10-(2-((tert-butyldimethylsilyloxy)ethyl)-7-(methylsulfonyl)-7,11b-dihydro-6aH-benzo[c]carbazole (17l):** Pale yellow oil: 0.048 mmol, 21.8 mg, 52% yield;  $^1\text{H}$  NMR (300 MHz,  $\text{CDCl}_3$ )  $\delta$  7.37 (d,  $J = 8.1$  Hz, 1H), 7.29 (dd,  $J = 9.0, 4.2$  Hz, 3H), 7.09 – 7.03 (m, 2H), 6.80 (s, 1H), 6.42 (dd,  $J = 9.9, 1.9$  Hz, 1H), 5.83 (dd,  $J = 9.9, 2.4$  Hz, 1H), 5.53 (dt,  $J = 9.8, 2.2$  Hz, 1H), 4.63 (d,  $J = 9.8$  Hz, 1H), 3.71 (t,  $J = 6.6$  Hz, 2H), 2.93 (s, 3H), 2.69 (t,  $J = 6.6$  Hz, 2H), 0.81 (d,  $J = 6.6$  Hz, 10H), -0.12 (s, 6H);  $^{13}\text{C}$  NMR (75 MHz,  $\text{CDCl}_3$ )  $\delta$  138.2, 136.7, 134.9, 131.5, 130.7, 129.4, 129.2, 128.8, 128.2, 128.1, 127.9, 126.5, 125.6, 121.2, 116.1, 64.4, 64.0, 43.9, 39.1, 37.7, 26.0, 18.4, -5.3, -5.4; HRMS (ESI): Calc. for  $\text{C}_{25}\text{H}_{33}\text{NO}_3\text{SNa}$  ( $\text{M}+\text{Na}$ ) $^+$ : 478.1843; found: 478.1850.

**7-(methylsulfonyl)-10-(trimethylsilyl)-7,11b-dihydro-6aH-benzo[c]carbazole (17m):** Pale yellow oil: 0.038 mmol, 14.2 mg, 43% yield;  $^1\text{H}$  NMR (300 MHz,  $\text{CDCl}_3$ )  $\delta$  7.47 – 7.42 (m, 1H), 7.40 – 7.31 (m, 3H), 7.08 (d,  $J = 5.5$  Hz, 2H), 6.44 (dd,  $J = 9.9, 2.0$  Hz, 1H), 5.86 (dd,  $J = 9.9, 2.5$  Hz, 1H), 5.54 (dt,  $J = 10.0, 2.3$  Hz, 1H), 4.67 (d,  $J = 10.0$  Hz, 1H), 2.98 (s, 3H), 0.19 – 0.15 (m, 9H);  $^{13}\text{C}$  NMR (75 MHz,  $\text{CDCl}_3$ )  $\delta$  140.6, 136.6, 134.0, 133.9, 131.6, 130.7, 129.3, 129.2, 129.0, 128.1, 128.0, 126.1, 115.1, 63.7, 43.8, 38.4, -0.9; HRMS (ESI): Calc. for  $\text{C}_{20}\text{H}_{24}\text{NO}_2\text{SSi}$  ( $\text{M}+\text{H}$ ) $^+$ : 370.1292; found: 370.1299.

**10-isopropyl-7-(methylsulfonyl)-7,11b-dihydro-6aH-benzo[c]carbazol-5-yl methanesulfonate (18) and 4-(N-(4-isopropylphenyl)methylsulfonamido)naphthalen-1-yl methanesulfonate (19) :**

A solution of bis(*tert*-butylcarbonyloxy)iodobenzene (0.08 mmol, 1.6 equiv.) in  $(\text{CF}_3)_2\text{CHOH}$  (“HFIP”, 0.2 ml) was added dropwise on 30 second to a vigorously stirred solution of sulfonamide **15a** (10.7 mg, 0.05 mmol, 1 equiv.) and the O-Mesyl-Naphthol (0.35 mmol, 7.0 equiv.) in HFIP/DCM (2:1; ml) at  $-4$  °C. The mixture was then stirred for 30 seconds and

quenched with NaHCO<sub>3</sub>. The phases were separated and the aqueous phase extracted with EtOAc. The organic phases were dried over Na<sub>2</sub>SO<sub>4</sub>, filtered and concentrated under vacuum. The residue was purified by silica gel chromatography with a mixture of ethyl acetate/hexane to afford **18** and **19** in 72% yield (0.036 mmol, 15.6 mg) as a 1:1.2 ratio. **18**: <sup>1</sup>H NMR (300 MHz, CDCl<sub>3</sub>) δ 7.51 (d, *J* = 7.6 Hz, 1H), 7.48 – 7.33 (m, 5H), 7.11 (d, *J* = 8.2 Hz, 1H), 6.78 (s, 1H), 5.93 (d, *J* = 2.9 Hz, 1H), 5.70 (dd, *J* = 9.8, 3.0 Hz, 1H), 4.68 (d, *J* = 9.7 Hz, 1H), 3.09 (s, 3H), 2.99 (s, 3H), 2.80 (p, *J* = 6.9 Hz, 1H), 1.16 (d, *J* = 4.0 Hz, 3H), 1.14 (d, *J* = 4.0 Hz, 3H); <sup>13</sup>C NMR (75 MHz, CDCl<sub>3</sub>) δ 146.1, 145.9, 137.5, 133.7, 133.0, 129.8, 129.2, 128.3, 126.9, 123.4, 122.8, 115.8, 114.5, 63.3, 43.8, 38.3, 38.1, 33.9, 24.4, 24.0. HRMS (ESI): Calc. for C<sub>21</sub>H<sub>24</sub>NO<sub>5</sub>S<sub>2</sub> (M+H)<sup>+</sup>: 434.1090; found: 434.1083.

**19**: <sup>1</sup>H NMR (300 MHz, CDCl<sub>3</sub>) δ 8.36 (dd, *J* = 7.1, 2.4 Hz, 1H), 8.14 (dd, *J* = 7.0, 2.5 Hz, 1H), 7.72 (d, *J* = 8.2 Hz, 1H), 7.68 – 7.62 (m, 2H), 7.60 (d, *J* = 8.1 Hz, 1H), 7.45 (d, *J* = 8.5 Hz, 2H), 7.19 (d, *J* = 8.5 Hz, 2H), 3.25 (s, 3H), 3.24 (s, 3H), 2.86 (p, *J* = 6.9 Hz, 1H), 1.19 (d, *J* = 6.9 Hz, 6H); <sup>13</sup>C NMR (75 MHz, CDCl<sub>3</sub>) δ 147.9, 145.6, 138.7, 136.3, 133.8, 128.6, 128.4, 128.1, 127.7, 127.4, 125.9, 124.4, 122.1, 118.2, 40.1, 38.4, 33.7, 24.0. HRMS (ESI): Calc. for C<sub>21</sub>H<sub>23</sub>NO<sub>5</sub>S<sub>2</sub>Na (M+Na)<sup>+</sup>: 456.0910; found: 456.0913.

**(9s,10s)-10-(N-p-tolylmethylsulfonamido)-9,10-dihydroanthracen-9-yl pivalate (20) :**

A solution of bis(*tert*-butylcarbonyloxy)iodobenzene (0.096 mmol, 1.6 equiv.) in (CF<sub>3</sub>)<sub>2</sub>CHOH (“HFIP”, 0.2 ml) was added dropwise on 30 second to a vigorously stirred solution of sulfonamide **15a** (11.1 mg, 0.060 mmol, 1 equiv.) and the anthracene (0.299 mmol, 5.0 equiv.) in HFIP/DCM (2:1; ml) and Na<sub>2</sub>CO<sub>3</sub> at -4 °C. The mixture was then stirred for 30 seconds and quenched with NaHCO<sub>3</sub>. The phases were separated and the aqueous phase extracted with EtOAc. The organic phases were dried over Na<sub>2</sub>SO<sub>4</sub>, filtered and concentrated under vacuum. The residue was purified by silica gel chromatography with a mixture of ethyl acetate/hexane to afford **20** in 46% yield (0.027 mmol, 12.1 mg). <sup>1</sup>H NMR (300 MHz, CDCl<sub>3</sub>) δ 7.81 (d, *J* = 7.5 Hz, 2H), 7.46 (t, *J* = 7.4 Hz, 2H), 7.35 (t, *J* = 7.1 Hz, 2H), 7.02 (d, *J* = 7.8 Hz, 2H), 6.85 (d, *J* = 7.0 Hz, 2H), 6.84 (s, 1H), 6.16 (d, *J* = 8.2 Hz, 2H), 5.52 (s, 1H), 3.00 (s, 3H), 2.26 (s, 3H), 1.30 (s, 9H); <sup>13</sup>C NMR (75 MHz, CDCl<sub>3</sub>) δ 178.2, 139.7, 138.4, 133.2, 131.9, 131.7, 129.7, 129.4, 128.5, 128.5, 125.2, 66.4, 60.3, 41.1, 39.1, 27.4, 21.3. HRMS (ESI): Calc. for C<sub>27</sub>H<sub>30</sub>NO<sub>4</sub>S (M+H)<sup>+</sup>: 464.1890; found: 464.1882.

### General procedure for the formation of coupling product 5:

Trifluoroacetic acid (0.55 mmol, 5.0 equiv.) was added to a solution of cycloaddition product **21** (0.11 mmol, 1.0 equiv.) in DCM at room temperature and the solution was heated at 40 °C. After completion, the solution was evaporated under reduced pressure and purified by silica gel chromatography with a mixture of ethyl acetate/hexane to give the corresponding coupling product **5**.

**2'-iodo-5-(2-(phenylsulfonyl)ethyl)-[1,1'-biphenyl]-2-ol (5a):** Pale yellow oil: 0.032 mmol, 15.0 mg, 97% yield; <sup>1</sup>H NMR (300 MHz, CDCl<sub>3</sub>) δ 8.01 – 7.92 (m, 3H), 7.67 – 7.54 (m, 3H), 7.43 (dd, *J* = 7.4, 6.6 Hz, 1H), 7.24 (d, *J* = 1.6 Hz, 1H), 7.08 (ddd, *J* = 15.8, 8.0, 1.9 Hz, 2H), 6.88 (d, *J* = 8.3 Hz, 1H), 6.83 (d, *J* = 2.1 Hz, 1H), 3.41 – 3.32 (m, 2H), 3.06 – 2.98 (m, 2H); <sup>13</sup>C NMR (75 MHz, CDCl<sub>3</sub>) δ 151.2, 141.5, 139.9, 139.2, 133.9, 131.3, 131.0, 130.3, 130.1, 129.8, 129.5, 129.4, 128.9, 128.3, 116.4, 100.6, 57.9, 28.1; IR ν (cm<sup>-1</sup>) 3418, 1634, 1511, 1446, 1306, 1149; HRMS (ESI): Calc. for C<sub>20</sub>H<sub>18</sub>IO<sub>3</sub>S (M+H)<sup>+</sup>: 465.0016; found: 465.0013.

**2'-iodo-5'-methyl-5-(2-(phenylsulfonyl)ethyl)-[1,1'-biphenyl]-2-ol (5b):** Pale yellow oil: 0.051 mmol, 24.5 mg, 91% yield; <sup>1</sup>H NMR (300 MHz, CDCl<sub>3</sub>) δ 7.94 (d, *J* = 7.1 Hz, 2H), 7.82 (d, *J* = 8.1 Hz, 1H), 7.67 – 7.53 (m, 3H), 7.07 (d, *J* = 1.9 Hz, 1H), 7.04 (dd, *J* = 8.3, 2.3 Hz, 1H), 6.92 (dd, *J* = 8.2, 2.1 Hz, 1H), 6.87 (d, *J* = 8.3 Hz, 1H), 6.82 (d, *J* = 2.2 Hz, 1H), 3.41 – 3.33 (m, 2H), 3.05 – 2.97 (m, 2H), 2.32 (s, 3H); <sup>13</sup>C NMR (75 MHz, CDCl<sub>3</sub>) δ 151.2, 141.2, 139.6, 139.2, 139.1, 133.9, 131.8, 131.3, 131.2, 130.3, 129.7, 129.5, 129.4, 128.3, 116.3, 96.3, 57.9, 28.1, 21.0; HRMS (ESI): Calc. for C<sub>21</sub>H<sub>23</sub>INO<sub>3</sub>S (M+NH<sub>4</sub>)<sup>+</sup>: 496.0438; found: 496.0416.

**5'-ethyl-2'-iodo-5-(2-(phenylsulfonyl)ethyl)-[1,1'-biphenyl]-2-ol (5c):** Pale yellow oil: 0.041 mmol, 20.0 mg, 98% yield; <sup>1</sup>H NMR (300 MHz, CDCl<sub>3</sub>) δ 7.94 (d, *J* = 7.1 Hz, 2H), 7.85 (d, *J* = 8.1 Hz, 1H), 7.67 – 7.55 (m, 3H), 7.09 (d, *J* = 2.1 Hz, 1H), 7.05 (dd, *J* = 8.3, 2.2 Hz, 1H), 6.98 – 6.91 (m, 1H), 6.88 (d, *J* = 8.3 Hz, 1H), 6.83 (d, *J* = 2.1 Hz, 1H), 4.71 (s, 1H), 3.41 – 3.33 (m, 2H), 3.05 – 2.98 (m, 2H), 2.62 (q, *J* = 7.6 Hz, 2H), 1.23 (t, *J* = 7.5 Hz, 3H); <sup>13</sup>C NMR (75 MHz, CDCl<sub>3</sub>) δ 151.2, 145.4, 141.2, 139.8, 139.2, 133.9, 131.4, 130.6, 130.3, 130.0, 129.7, 129.5, 129.4, 128.3, 116.3, 96.5, 57.9, 28.4, 28.1, 15.4; HRMS (ESI): Calc. for C<sub>22</sub>H<sub>22</sub>IO<sub>3</sub>S (M+H)<sup>+</sup>: 493.0329; found: 493.0324.

**2'-iodo-5'-isopropyl-5-(2-(phenylsulfonyl)ethyl)-[1,1'-biphenyl]-2-ol (5d):** Pale yellow oil: 0.059 mmol, 29.7 mg, 90% yield;  $^1\text{H}$  NMR (300 MHz,  $\text{CDCl}_3$ )  $\delta$  7.95 (d,  $J = 7.2$  Hz, 2H), 7.86 (d,  $J = 8.2$  Hz, 1H), 7.67 – 7.57 (m, 4H), 7.12 (d,  $J = 2.2$  Hz, 1H), 7.05 (dd,  $J = 8.3, 2.1$  Hz, 1H), 6.98 (d,  $J = 8.3$  Hz, 2H), 6.88 (d,  $J = 8.3$  Hz, 1H), 6.84 (d,  $J = 2.1$  Hz, 1H), 3.42 – 3.34 (m, 2H), 3.06 – 2.97 (m, 2H), 2.94 – 2.83 (m, 1H), 1.23 (t,  $J = 6.7$  Hz, 6H);  $^{13}\text{C}$  NMR (75 MHz,  $\text{CDCl}_3$ )  $\delta$  151.2, 150.2, 141.2, 139.8, 139.1, 137.5, 134.0, 131.5, 130.3, 129.7, 129.5, 129.4, 129.3, 128.8, 128.6, 128.3, 116.3, 96.6, 57.9, 33.8, 28.1, 23.9, 23.9; IR  $\nu$  ( $\text{cm}^{-1}$ ) 3426, 1509, 1446, 1306, 1149; HRMS (ESI): Calc. for  $\text{C}_{23}\text{H}_{24}\text{IO}_3\text{S}$  ( $\text{M}+\text{H}$ ) $^+$ : 507.0485; found: 507.0493.

**5-(2-(phenylsulfonyl)ethyl)-[1,1'-biphenyl]-2-ol (5e):** Pale yellow oil: 0.082 mmol, 27.7 mg, 97% yield;  $^1\text{H}$  NMR (300 MHz,  $\text{CDCl}_3$ )  $\delta$  7.93 (d,  $J = 7.2$  Hz, 2H), 7.67 – 7.55 (m, 3H), 7.50 – 7.37 (m, 5H), 7.02 – 6.96 (m, 2H), 6.87 (d,  $J = 8.1$  Hz, 1H), 3.42 – 3.33 (m, 2H), 3.06 – 2.97 (m, 2H);  $^{13}\text{C}$  NMR (75 MHz,  $\text{CDCl}_3$ )  $\delta$  151.5, 139.2, 136.8, 133.9, 130.2, 129.7, 129.5, 129.4, 129.1, 129.0, 128.6, 128.2, 128.2, 116.4, 57.9, 28.1; IR  $\nu$  ( $\text{cm}^{-1}$ ) 3425, 1446, 1305, 1149; HRMS (ESI): Calc. for  $\text{C}_{40}\text{H}_{36}\text{NaO}_6\text{S}_2$  ( $2\text{M}+\text{Na}$ ) $^+$ : 699.1846; found: 699.1823.

**2'-iodo-5-(2-((4-methoxyphenyl)sulfonyl)ethyl)-[1,1'-biphenyl]-2-ol (5f):** Pale yellow oil: 0.025 mmol, 12.3 mg, 87% yield;  $^1\text{H}$  NMR (300 MHz,  $\text{CDCl}_3$ )  $\delta$  8.00 – 7.95 (m, 1H), 7.85 (d,  $J = 8.9$  Hz, 2H), 7.43 (dt,  $J = 7.5, 3.7$  Hz, 1H), 7.08 (ddd,  $J = 15.7, 7.9, 1.9$  Hz, 2H), 7.02 (d,  $J = 8.9$  Hz, 2H), 6.88 (d,  $J = 8.3$  Hz, 1H), 6.83 (d,  $J = 2.1$  Hz, 1H), 3.88 (s, 3H), 3.38 – 3.30 (m, 2H), 3.05 – 2.95 (m, 2H);  $^{13}\text{C}$  NMR (75 MHz,  $\text{CDCl}_3$ )  $\delta$  164.0, 151.2, 141.6, 139.9, 131.3, 131.0, 130.5, 130.3, 130.1, 129.8, 129.6, 128.9, 128.4, 116.4, 114.7, 100.6, 58.2, 55.9, 28.3; IR  $\nu$  ( $\text{cm}^{-1}$ ) 3418, 1594, 1497, 1262, 1144; HRMS (ESI): Calc. for  $\text{C}_{21}\text{H}_{20}\text{IO}_4\text{S}$  ( $\text{M}+\text{H}$ ) $^+$ : 495.0121; found: 495.0116.

**2-(naphthalen-1-yl)-4-(2-(phenylsulfonyl)ethyl)phenol (5g):** Pale yellow oil: 0.030 mmol, 11.5 mg, 98% yield;  $^1\text{H}$  NMR (300 MHz,  $\text{CDCl}_3$ )  $\delta$  7.92 (dd,  $J = 5.3, 3.2$  Hz, 4H), 7.63 (d,  $J = 7.3$  Hz, 1H), 7.55 (t,  $J = 7.8$  Hz, 5H), 7.49 (dd,  $J = 8.5, 1.3$  Hz, 1H), 7.42 (t,  $J = 7.5$  Hz, 2H), 7.12 (dd,  $J = 8.3, 2.3$  Hz, 1H), 7.00 (d,  $J = 2.2$  Hz, 1H), 6.96 (d,  $J = 8.3$  Hz, 1H), 3.42 – 3.35 (m, 2H), 3.09 – 3.01 (m, 2H);  $^{13}\text{C}$  NMR (75 MHz,  $\text{CDCl}_3$ )  $\delta$  152.3, 139.3, 134.1, 133.9, 133.7, 131.8, 131.0, 129.5, 129.5, 129.2, 128.7, 128.3, 128.2, 127.0, 126.8, 126.6, 125.9, 125.6, 116.2, 57.9, 28.1; HRMS (ESI): Calc. for  $\text{C}_{24}\text{H}_{24}\text{NO}_3\text{S}$  ( $\text{M}+\text{NH}_4$ ) $^+$ : 406.1471; found: 406.1453.

**N-(4-methyl-2-(naphthalen-1-yl)phenyl)ethanesulfonamide (5h):** Pale yellow oil: 0.074 mmol, 24.0 mg, 97% yield;  $^1\text{H}$  NMR (300 MHz,  $\text{CDCl}_3$ )  $\delta$  7.95 (d,  $J = 8.2$  Hz, 2H), 7.62 – 7.46 (m, 5H), 7.41 (dd,  $J = 7.0, 1.1$  Hz, 1H), 7.30 (dd,  $J = 8.3, 1.6$  Hz, 1H), 7.22 (d,  $J = 1.9$  Hz, 1H), 2.83 (q,  $J = 7.4$  Hz, 2H), 2.41 (s, 3H), 0.80 (t,  $J = 7.4$  Hz, 3H);  $^{13}\text{C}$  NMR (75 MHz,  $\text{CDCl}_3$ )  $\delta$  135.0, 134.8, 134.0, 132.6, 132.1, 131.8, 131.6, 130.0, 129.2, 128.9, 127.6, 127.2, 126.7, 125.8, 125.2, 120.8, 46.1, 20.9, 7.9; IR  $\nu$  ( $\text{cm}^{-1}$ ) 3357, 1498, 1333, 1153; HRMS (ESI): Calc. for  $\text{C}_{19}\text{H}_{20}\text{NO}_2\text{S}$  ( $\text{M}+\text{H}$ ) $^+$ : 326.1209; found: 326.1203.

**N-(2-(naphthalen-1-yl)-4-propylphenyl)methanesulfonamide (5i):** Pale yellow oil: 0.051 mmol, 17.2 mg, 83% yield;  $^1\text{H}$  NMR (300 MHz,  $\text{CDCl}_3$ )  $\delta$  7.95 (d,  $J = 8.2$  Hz, 2H), 7.68 (d,  $J = 8.3$  Hz, 1H), 7.61 – 7.51 (m, 2H), 7.46 (d,  $J = 3.2$  Hz, 2H), 7.39 (d,  $J = 7.0$  Hz, 1H), 7.30 (dd,  $J = 8.3, 1.9$  Hz, 1H), 7.15 (d,  $J = 1.9$  Hz, 1H), 2.69 (s, 3H), 2.67 – 2.59 (m, 2H), 1.68 (sx,  $J = 7.4$  Hz, 2H), 0.97 (t,  $J = 7.3$  Hz, 3H);  $^{13}\text{C}$  NMR (75 MHz,  $\text{CDCl}_3$ )  $\delta$  139.8, 135.0, 134.1, 132.7, 131.8, 131.7, 131.5, 129.4, 129.2, 128.9, 127.7, 127.2, 126.7, 125.8, 125.1, 120.9, 39.4, 37.4, 24.6, 13.9; HRMS (ESI): Calc. for  $\text{C}_{20}\text{H}_{22}\text{NO}_2\text{S}$  ( $\text{M}+\text{H}$ ) $^+$ : 340.1366; found: 340.1359.

**N-(4-isopropyl-2-(naphthalen-1-yl)phenyl)methanesulfonamide (5j):** Pale yellow oil: 0.105 mmol, 35.8 mg, 97% yield;  $^1\text{H}$  NMR (300 MHz,  $\text{CDCl}_3$ )  $\delta$  7.96 (d,  $J = 8.2$  Hz, 2H), 7.68 (d,  $J = 8.4$  Hz, 1H), 7.60 – 7.52 (m, 2H), 7.48 – 7.45 (m, 2H), 7.40 (dd,  $J = 7.0, 1.1$  Hz, 1H), 7.35 (dd,  $J = 8.4, 2.2$  Hz, 1H), 7.19 (d,  $J = 2.1$  Hz, 1H), 2.95 (h,  $J = 6.9$  Hz, 1H), 2.69 (s, 3H), 1.27 (d,  $J = 1.8$  Hz, 6H);  $^{13}\text{C}$  NMR (75 MHz,  $\text{CDCl}_3$ )  $\delta$  146.0, 135.1, 134.1, 132.7, 131.8, 131.7, 129.6, 129.2, 128.9, 127.7, 127.4, 127.2, 126.7, 125.8, 125.1, 121.0, 39.5, 33.7, 24.1; HRMS (ESI): Calc. for  $\text{C}_{20}\text{H}_{22}\text{NO}_2\text{S}$  ( $\text{M}+\text{H}$ ) $^+$ : 340.1366; found: 340.1352.

**N-(4-(2-hydroxyethyl)-2-(naphthalen-1-yl)phenyl)methanesulfonamide (5k):** Pale yellow oil: 0.016 mmol, 5.5 mg, 76% yield;  $^1\text{H}$  NMR (300 MHz,  $\text{CDCl}_3$ )  $\delta$  7.96 (d,  $J = 8.3$  Hz, 2H), 7.72 (d,  $J = 8.4$  Hz, 1H), 7.55 (ddd,  $J = 7.6, 6.5, 5.0$  Hz, 2H), 7.45 (d,  $J = 3.7$  Hz, 2H), 7.40 – 7.33 (m, 2H), 7.20 (d,  $J = 2.0$  Hz, 1H), 6.01 (s, 1H), 3.91 (t,  $J = 6.5$  Hz, 2H), 2.91 (t,  $J = 6.5$  Hz, 2H), 2.72 (s, 3H);  $^{13}\text{C}$  NMR (75 MHz,  $\text{CDCl}_3$ )  $\delta$  135.7, 134.6, 134.1, 133.5, 132.1, 131.9, 131.7, 130.0, 129.4, 129.0, 127.8, 127.3, 126.8, 125.8, 125.0, 120.9, 63.6, 39.6, 38.6; IR  $\nu$  ( $\text{cm}^{-1}$ ) 3349, 1496, 1329, 1155; HRMS (ESI): Calc. for  $\text{C}_{19}\text{H}_{19}\text{NNaO}_3\text{S}$  ( $\text{M}+\text{Na}$ ) $^+$ : 364.0978; found: 364.0968.

**4-(methylsulfonamido)-3-(naphthalen-1-yl)phenethyl 2,2,2-trifluoroacetate (5l):** Pale yellow oil: 0.038 mmol, 16.5 mg, 79% yield;  $^1\text{H}$  NMR (300 MHz,  $\text{CDCl}_3$ )  $\delta$  7.97 (d,  $J = 8.2$  Hz, 2H), 7.75 (d,  $J = 8.4$  Hz, 1H), 7.62 – 7.51 (m, 2H), 7.50 – 7.32 (m, 5H), 7.19 (d,  $J = 1.9$  Hz, 1H), 4.59 (t,  $J = 6.8$  Hz, 2H), 3.09 (t,  $J = 6.8$  Hz, 2H), 2.73 (s, 3H);  $^{13}\text{C}$  NMR (75 MHz,  $\text{CDCl}_3$ )  $\delta$  134.2, 133.1, 132.1, 131.9, 131.7, 129.9, 129.6, 129.0, 127.7, 127.4, 126.9, 125.8, 124.9, 120.7, 68.2, 39.6, 34.1; HRMS (ESI): Calc. for  $\text{C}_{21}\text{H}_{18}\text{F}_3\text{NNaO}_4\text{S}$  ( $\text{M}+\text{Na}$ ) $^+$ : 460.0801; found: 460.0795.

**N-(2-(naphthalen-1-yl)-4-(2-(phenylsulfonyl)ethyl)phenyl)methanesulfonamide (5m):** Pale yellow oil: 0.011 mmol, 5.0 mg, 94% yield;  $^1\text{H}$  NMR (300 MHz,  $\text{CDCl}_3$ )  $\delta$  7.94 (t,  $J = 6.8$  Hz, 4H), 7.72 – 7.63 (m, 2H), 7.62 – 7.51 (m, 4H), 7.44 (t,  $J = 7.5$  Hz, 1H), 7.37 – 7.31 (m, 2H), 7.08 (d,  $J = 1.6$  Hz, 1H), 5.98 (s, 1H), 3.44 – 3.36 (m, 2H), 3.15 – 3.06 (m, 2H), 2.71 (s, 3H);  $^{13}\text{C}$  NMR (75 MHz,  $\text{CDCl}_3$ )  $\delta$  139.2, 134.4, 134.0, 132.0, 131.6, 131.4, 129.6, 129.6, 129.4, 129.1, 128.3, 127.7, 127.4, 126.9, 125.8, 124.8, 120.8, 57.5, 39.7, 28.2; HRMS (ESI): Calc. for  $\text{C}_{25}\text{H}_{24}\text{NO}_4\text{S}_2$  ( $\text{M}+\text{H}$ ) $^+$ : 466.1141; found: 466.1133.

#### General procedure for the formation of coupling product 23:

A solution of bis(*tert*-butylcarbonyloxy)iodobenzene (0.17 mmol, 1.6 equiv.) in  $(\text{CF}_3)_2\text{CHOH}$  (“HFIP”, 0.35 ml) was added dropwise on 30 second to a vigorously stirred solution of sulfamide **22** (0.11 mmol, 1 equiv.) and naphthalene (0.55 mmol, 5.0 equiv.) in HFIP/DCM (2:1; ml) at  $-4$  °C. The mixture was then stirred for 30 seconds and quenched with  $\text{NaHCO}_3$ . The phases were separated and the aqueous phase extracted with EtOAc. The organic phases were dried over  $\text{Na}_2\text{SO}_4$ , filtered and concentrated under vacuum. The residue was purified by silica gel chromatography with a mixture of ethyl acetate/hexane to give the corresponding coupling product **23**.

**N-(4-methyl-2-(naphthalen-1-yl)phenyl)pyrrolidine-1-sulfonamide (23a):** Pale yellow oil: 0.035 mmol, 12.9 mg, 55% yield;  $^1\text{H}$  NMR (300 MHz,  $\text{CDCl}_3$ )  $\delta$  8.37 (d,  $J = 8.3$  Hz, 1H), 7.89 (d,  $J = 7.5$  Hz, 1H), 7.85 (d,  $J = 8.2$  Hz, 2H), 7.57 – 7.48 (m, 3H), 7.46 (d,  $J = 8.3$  Hz, 2H), 7.09 (d,  $J = 8.3$  Hz, 2H), 3.36 (t,  $J = 6.6$  Hz, 4H), 2.28 (s, 3H), 1.72 – 1.65 (m, 4H);  $^{13}\text{C}$  NMR (75 MHz,  $\text{CDCl}_3$ )  $\delta$  140.2, 138.2, 135.9, 135.1, 132.0, 129.7, 128.9, 128.4, 128.0, 127.1, 126.4, 125.6, 125.5, 123.8, 49.0, 25.8, 21.0; HRMS (ESI): Calc. for  $\text{C}_{21}\text{H}_{23}\text{N}_2\text{O}_2\text{S}$  ( $\text{M}+\text{H}$ ) $^+$ : 367.1475; found: 367.1471.



**N-(4-ethyl-2-(naphthalen-1-yl)phenyl)pyrrolidine-1-sulfonamide (23b):** Pale yellow oil: 0.057 mmol, 21.6 mg, 64% yield;  $^1\text{H}$  NMR (300 MHz,  $\text{CDCl}_3$ )  $\delta$  8.38 (d,  $J = 8.3$  Hz, 1H), 7.90 (d,  $J = 7.4$  Hz, 1H), 7.85 (d,  $J = 8.2$  Hz, 2H), 7.58 – 7.45 (m, 5H), 7.11 (d,  $J = 8.5$  Hz, 2H), 3.36 (t,  $J = 6.6$  Hz, 4H), 2.58 (q,  $J = 7.6$  Hz, 2H), 1.71 – 1.64 (m, 4H), 1.17 (t,  $J = 7.6$  Hz, 3H);  $^{13}\text{C}$  NMR (75 MHz,  $\text{CDCl}_3$ )  $\delta$  142.2, 140.3, 138.2, 135.1, 132.1, 128.9, 128.5, 128.4, 128.1, 127.1, 126.4, 125.6, 125.5, 123.8, 49.0, 28.4, 25.8, 15.5; IR  $\nu$  ( $\text{cm}^{-1}$ ) 1595, 1506, 1343, 1156; HRMS (ESI): Calc. for  $\text{C}_{22}\text{H}_{24}\text{N}_2\text{NaO}_2\text{S}$  ( $\text{M}+\text{Na}$ ) $^+$ : 403.1451; found: 403.1431.

**N-(4-isopropyl-2-(naphthalen-1-yl)phenyl)pyrrolidine-1-sulfonamide (23c):** Pale yellow oil: 0.031 mmol, 12.4 mg, 54% yield;  $^1\text{H}$  NMR (300 MHz,  $\text{CDCl}_3$ )  $\delta$  8.39 (d,  $J = 8.3$  Hz, 1H), 7.90 (d,  $J = 7.4$  Hz, 1H), 7.85 (d,  $J = 8.1$  Hz, 2H), 7.59 – 7.45 (m, 5H), 7.13 (d,  $J = 8.5$  Hz, 2H), 3.35 (t,  $J = 6.5$  Hz, 4H), 2.92 – 2.76 (m, 1H), 1.71 – 1.63 (m, 4H), 1.18 (d,  $J = 6.9$  Hz, 6H);  $^{13}\text{C}$  NMR (75 MHz,  $\text{CDCl}_3$ )  $\delta$  146.8, 140.3, 138.2, 135.1, 132.1, 128.9, 128.4, 128.0, 127.1, 126.4, 125.6, 125.5, 123.8, 49.0, 33.7, 25.8, 24.0. IR  $\nu$  ( $\text{cm}^{-1}$ ) 1498, 1343, 1156; HRMS (ESI): Calc. for  $\text{C}_{23}\text{H}_{27}\text{N}_2\text{O}_2\text{S}$  ( $\text{M}+\text{H}$ ) $^+$ : 395.1788; found: 395.1797.

**N-(4-chloro-2-(naphthalen-1-yl)phenyl)pyrrolidine-1-sulfonamide (23d):** Pale yellow oil: 0.054 mmol, 21.0 mg, 81% yield;  $^1\text{H}$  NMR (300 MHz,  $\text{CDCl}_3$ )  $\delta$  8.27 – 8.21 (m, 1H), 7.92 – 7.79 (m, 4H), 7.58 – 7.48 (m, 3H), 7.48 – 7.40 (m, 3H), 7.23 (d,  $J = 8.9$  Hz, 2H), 3.33 (d,  $J = 6.4$  Hz, 4H), 1.72 – 1.66 (m, 4H);  $^{13}\text{C}$  NMR (75 MHz,  $\text{CDCl}_3$ )  $\delta$  141.5, 137.4, 135.1, 131.9, 131.1, 129.5, 129.4, 129.2, 128.6, 128.7, 127.4, 126.6, 125.8, 125.6, 123.5, 49.0, 25.8. HRMS (ESI): Calc. for  $\text{C}_{20}\text{H}_{19}\text{ClKN}_2\text{O}_2\text{S}$  ( $\text{M}+\text{K}$ ) $^+$ : 425.0487; found: 425.0466.

**N-(2-(naphthalen-1-yl)-4-(trimethylsilyl)phenyl)pyrrolidine-1-sulfonamide (23e):** Pale yellow oil: 0.056 mmol, 23.7 mg, 52% yield;  $^1\text{H}$  NMR (300 MHz,  $\text{CDCl}_3$ )  $\delta$  8.32 (d,  $J = 8.0$  Hz, 1H), 7.90 – 7.82 (m, 3H), 7.52 (q,  $J = 8.0$  Hz, 4H), 7.43 (q,  $J = 8.6$  Hz, 4H), 3.37 (s, 4H), 1.72 – 1.65 (m, 4H), 0.21 (s,  $J = 3.2$  Hz, 9H);  $^{13}\text{C}$  NMR (75 MHz,  $\text{CDCl}_3$ )  $\delta$  143.3, 137.7, 137.3, 135.1, 134.2, 132.2, 129.1, 128.4, 128.4, 127.2, 126.5, 125.6, 123.8, 123.5, 49.0, 25.8, -1.0; IR  $\nu$  ( $\text{cm}^{-1}$ ) 1592, 1499, 1347, 1157; HRMS (ESI): Calc. for  $\text{C}_{46}\text{H}_{56}\text{N}_4\text{NaO}_4\text{S}_2\text{Si}$  ( $2\text{M}+\text{Na}$ ) $^+$ : 871.3174; found: 871.3148.



**Diethyl 8-(2-(phenylsulfonyl)ethyl)-1,4,4a,9b-tetrahydro-1,4-pidiazanodibenzo[b,d]furan-10,11-dicarboxylate (26) :**

To a solution of **12a** (36.7 mg, 0.079 mmol, 1.0 equiv.) in benzene (1.0 ml) was added DEAD (0.094 mmol, 1.2 equiv.). The reaction was heated at 60°C and the reaction was followed by TLC. After completion, the mixture was rapidly purified by silica gel chromatography with a mixture of ethyl acetate/hexane and the residue was treated with LiOH in THF/H<sub>2</sub>O (1:1) at 40°C. After 24h, the reaction was quenched with NH<sub>4</sub>Cl. The phases were separated and the aqueous phase extracted with EtOAc. The organic phases were dried over Na<sub>2</sub>SO<sub>4</sub>, filtered and concentrated under vacuum. The residue was purified by silica gel chromatography with a mixture of ethyl acetate/hexane to afford **26** in 59 % yield (0.047 mmol, 29.5 mg). <sup>1</sup>H NMR (300 MHz, CDCl<sub>3</sub>) δ 7.95 (d, *J* = 7.3 Hz, 2H), 7.72 – 7.64 (m, 1H), 7.63 – 7.50 (m, 3H), 6.91 (d, *J* = 7.7 Hz, 1H), 6.62 (s, 1H), 6.55 (d, *J* = 8.2 Hz, 1H), 6.35 (s, 1H), 5.20 – 5.00 (m, 2H), 4.89 (s, 1H), 4.34 – 4.10 (m, 4H), 3.39 – 3.29 (m, 2H), 3.07 – 2.96 (m, 2H), 1.35 – 1.22 (m, 7H); <sup>13</sup>C NMR (75 MHz, CDCl<sub>3</sub>) δ 160.2, 157.2, 139.2, 133.9, 129.8, 129.5, 128.2, 125.4, 109.8, 80.7, 63.4, 63.2, 58.0, 54.4, 51.0, 28.4, 14.6, 14.5; HRMS (ESI): Calc. for C<sub>26</sub>H<sub>27</sub>IN<sub>2</sub>O<sub>7</sub>S (M+H)<sup>+</sup>: 638.0578; found: 638.0568.

**10-methyl-7-(methylsulfonyl)-6,6a,7,11b-tetrahydro-5H-benzo[c]carbazole (27) :**

To a solution of **17a** (23.2 mg, 0.075 mmol, 1.0 equiv.) in MeOH (2.0 mL) was added Pd/C (0.0038mmol, 0.05 equiv.). The mixture was stirred at room temperature and the reaction was followed by Mass Spectroscopy. After completion the mixture was filtered through Celite and concentrated under vacuum. The residue was purified by silica gel chromatography with a mixture of ethyl acetate/hexane to afford **28** in 66% yield (0.049 mmol, 15.4 mg). <sup>1</sup>H NMR (300 MHz, CDCl<sub>3</sub>) δ 7.39 (d, *J* = 7.3 Hz, 1H), 7.34 – 7.29 (m, 2H), 7.21 (td, *J* = 7.4, 1.3 Hz, 1H), 7.12 (d, *J* = 7.5 Hz, 1H), 6.98 (d, *J* = 8.2 Hz, 1H), 6.90 (s, 1H), 4.81 – 4.71 (m, 2H), 2.93 (d, *J* = 7.0 Hz, 3H), 2.69 (t, *J* = 6.0 Hz, 2H), 2.38 – 2.26 (m, 1H), 2.23 (s, 3H), 2.03 – 1.89 (m, 1H); <sup>13</sup>C NMR (75 MHz, CDCl<sub>3</sub>) δ 138.7, 138.2, 135.0, 134.6, 134.4, 129.3, 129.0, 128.8, 127.0, 126.7, 125.9, 115.2, 63.1, 44.9, 36.4, 29.8, 26.2, 21.1. HRMS (ESI): Calc. for C<sub>18</sub>H<sub>20</sub>NO<sub>2</sub>S (M+H)<sup>+</sup>: 314.1209; found: 314.1211.

**10-methyl-7-(methylsulfonyl)-6,6a,7,11b-tetrahydro-5H-benzo[c]carbazole-5,6-diol (28) :**

To a solution of **17a** (18.7 mg, 0.060 mmol, 1.0 equiv.) in THF (1.5 mL) was added OsO<sub>4</sub> (0.012 mmol, 0.2 equiv.) and NMO (0.120 mmol, 2.0 equiv.). The mixture was stirred at room temperature and the reaction was followed by TLC. After completion, Na<sub>2</sub>S<sub>2</sub>O<sub>3</sub> was

added, followed by Celite and EtOAc. The mixture was stirred during 30 minutes, filtered through Celite and concentrated under vacuum. The residue was purified by silica gel chromatography with a mixture of ethyl acetate/hexane to afford **28** in 60% yield (0.036 mmol, 12.5 mg).  $^1\text{H}$  NMR (300 MHz,  $\text{CDCl}_3$ )  $\delta$  7.46 (d,  $J = 4.0$  Hz, 2H), 7.37 (d,  $J = 8.2$  Hz, 2H), 7.03 (d,  $J = 8.4$  Hz, 1H), 6.99 (s, 1H), 4.85 (t,  $J = 9.9$  Hz, 1H), 4.81 – 4.74 (m, 2H), 4.01 (dd,  $J = 7.4, 2.8$  Hz, 1H), 2.97 (s, 3H), 2.26 (s, 3H);  $^{13}\text{C}$  NMR (75 MHz,  $\text{CDCl}_3$ )  $\delta$  137.6, 135.5, 135.0, 134.2, 133.1, 130.0, 129.4, 129.2, 129.0, 127.9, 125.3, 117.2, 70.9, 69.5, 65.3, 44.7, 37.0, 21.2. HRMS (ESI): Calc. for  $\text{C}_{18}\text{H}_{20}\text{NO}_4\text{S}$  ( $\text{M}+\text{H}$ ) $^+$ : 346.1108; found: 346.1102.

### III. Copies of $^1\text{H}$ and $^{13}\text{C}$ NMR spectra

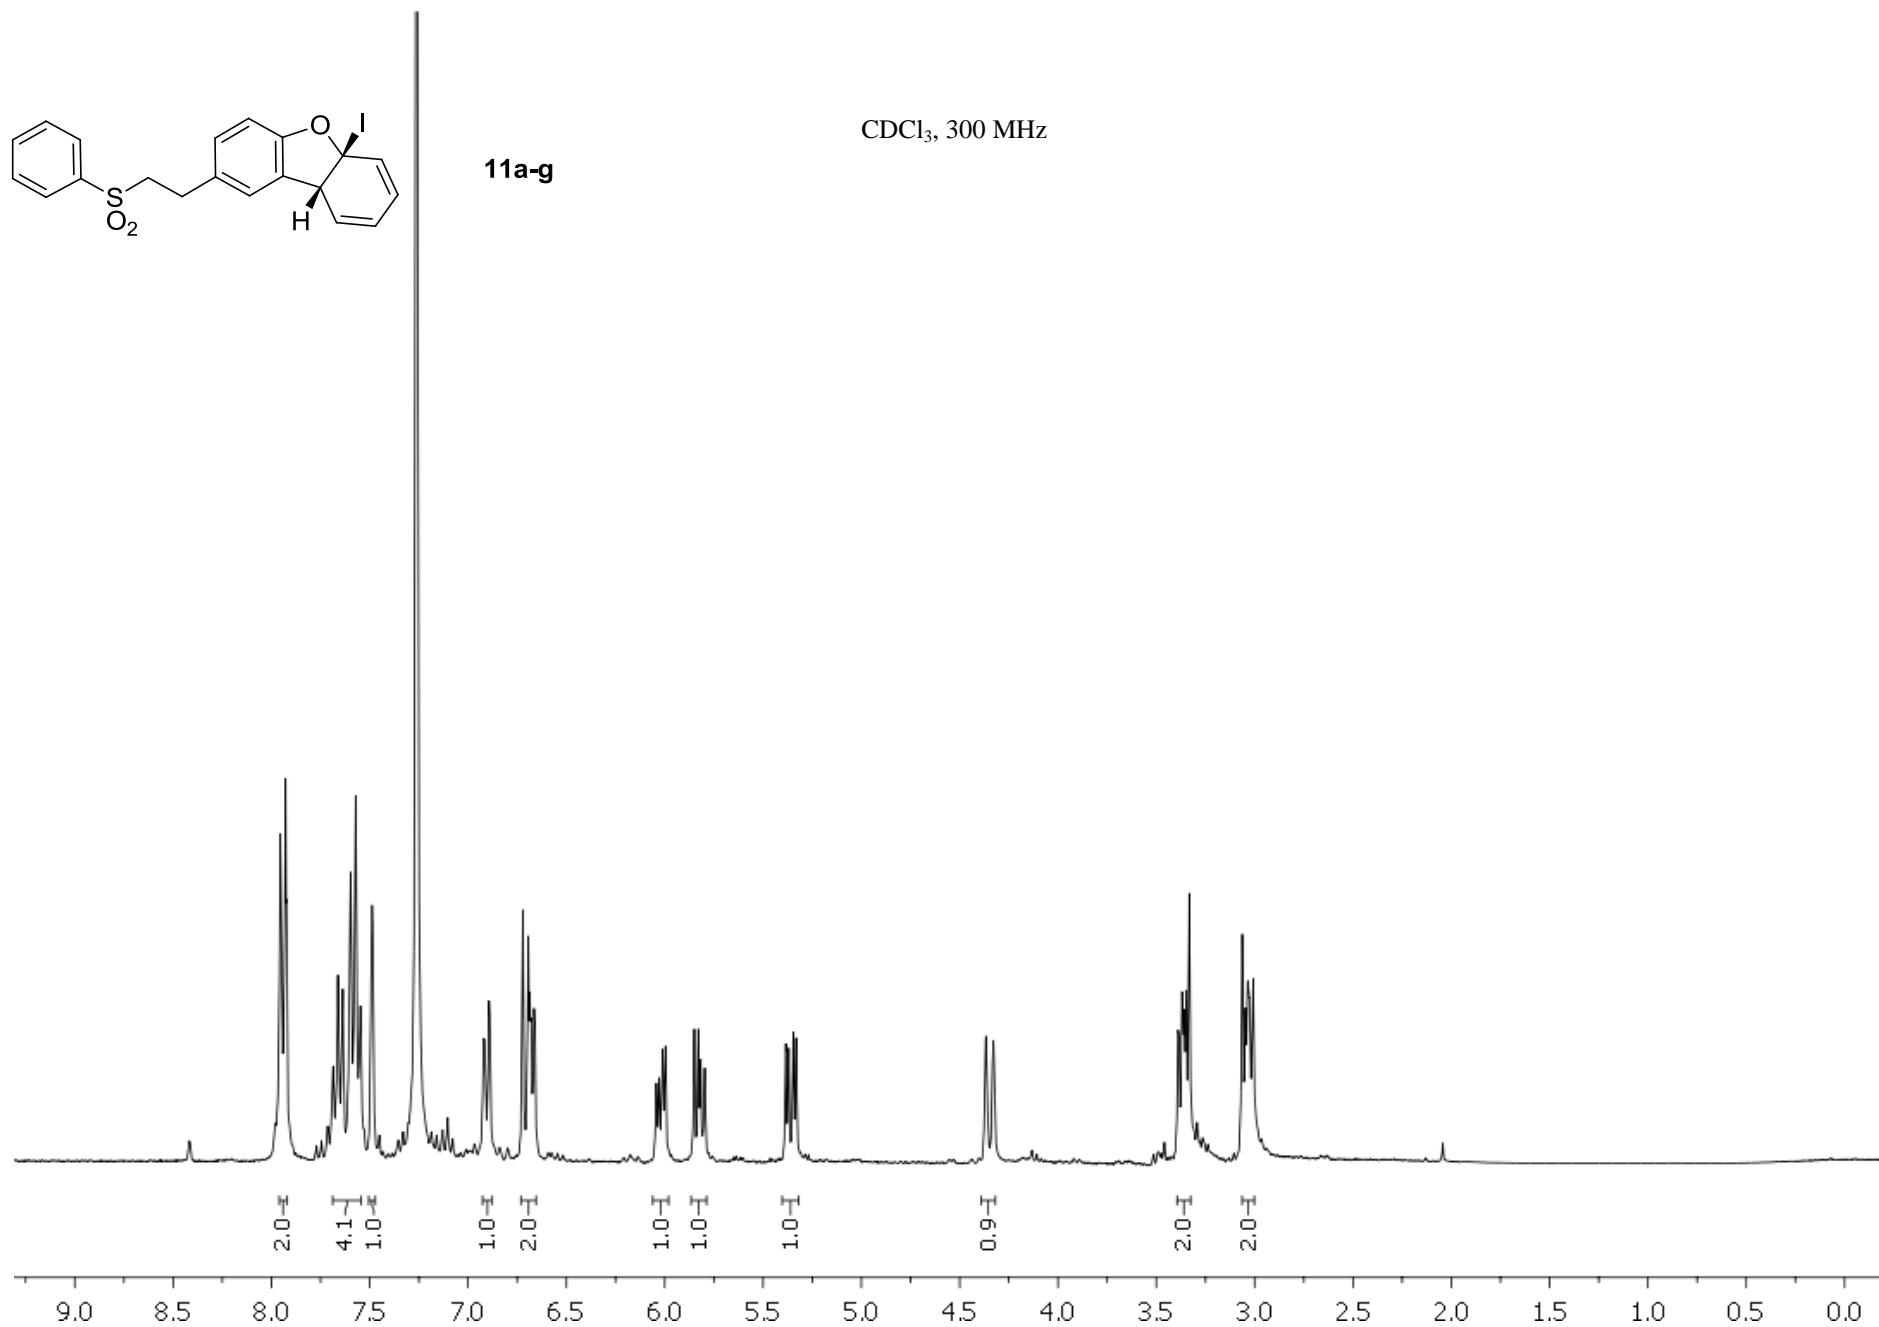

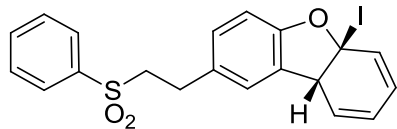

**11a-g**

CDCl<sub>3</sub>, 300 MHz

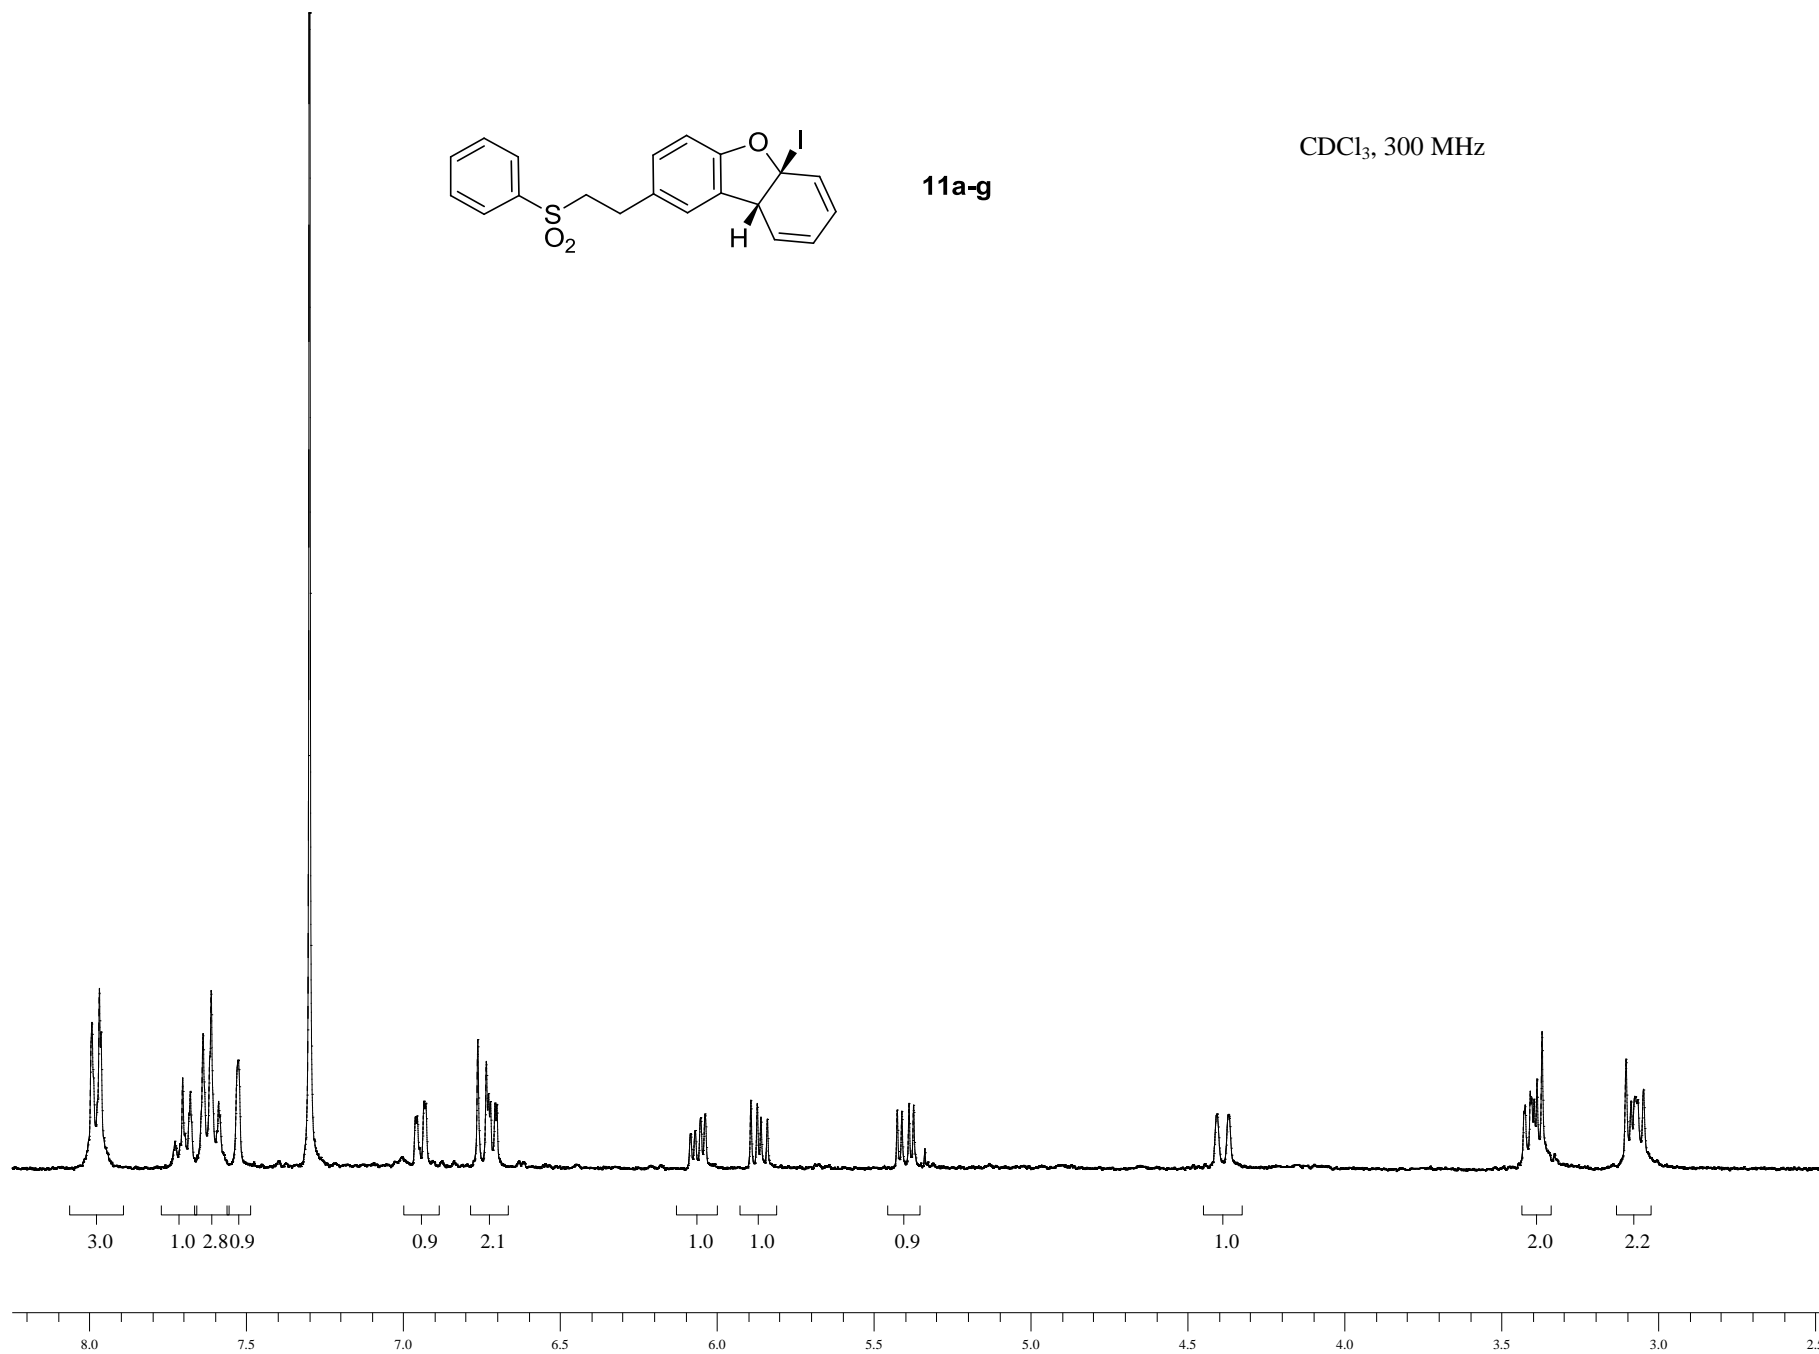

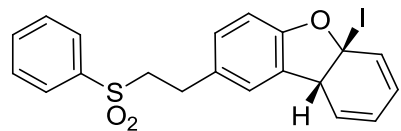

**11a-g**

CDCl<sub>3</sub>, 75 MHz

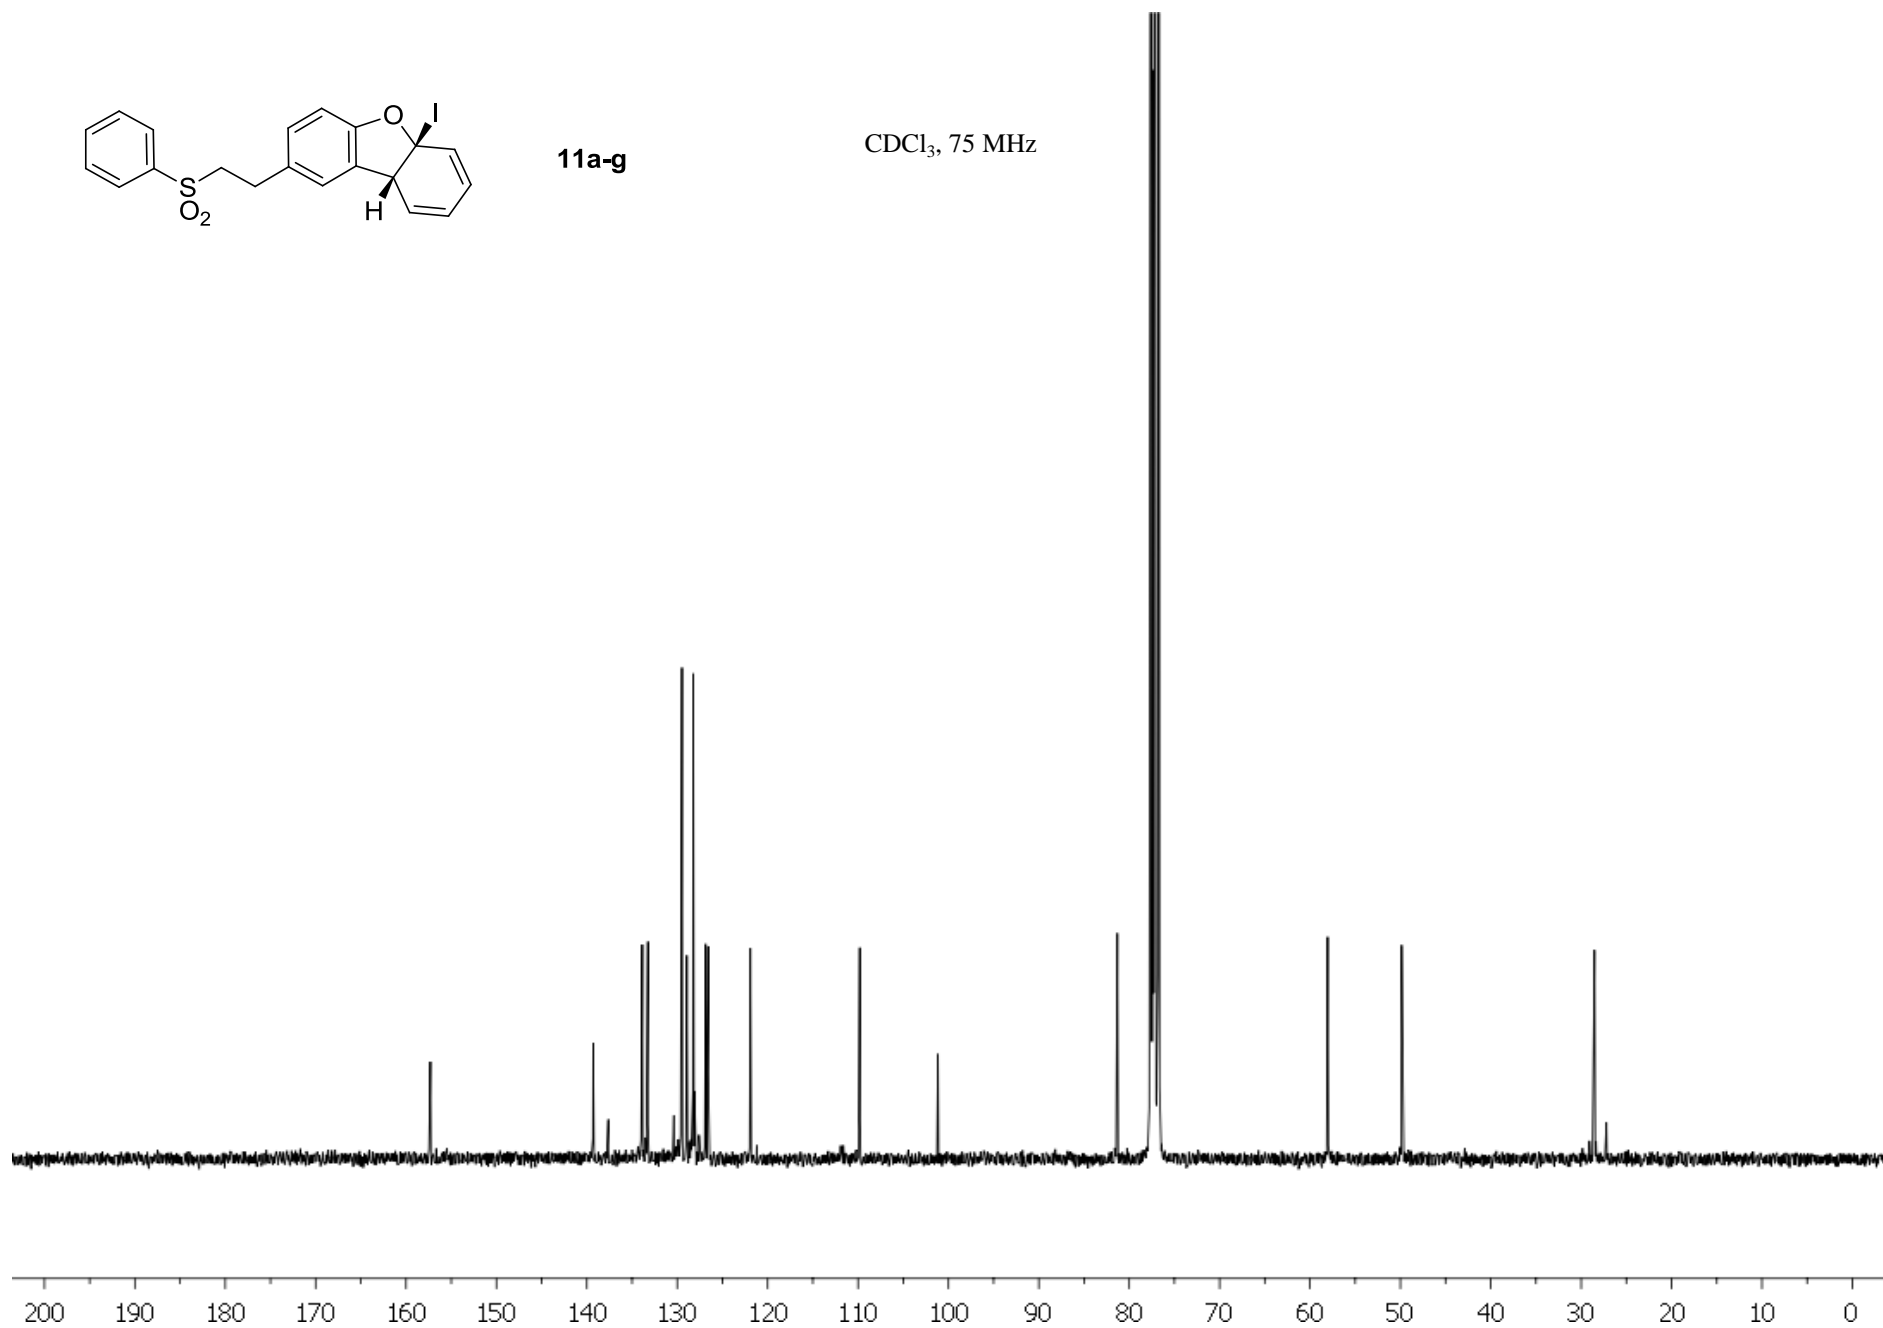

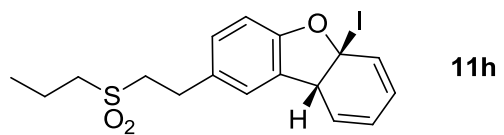

CDCl<sub>3</sub>, 300 MHz

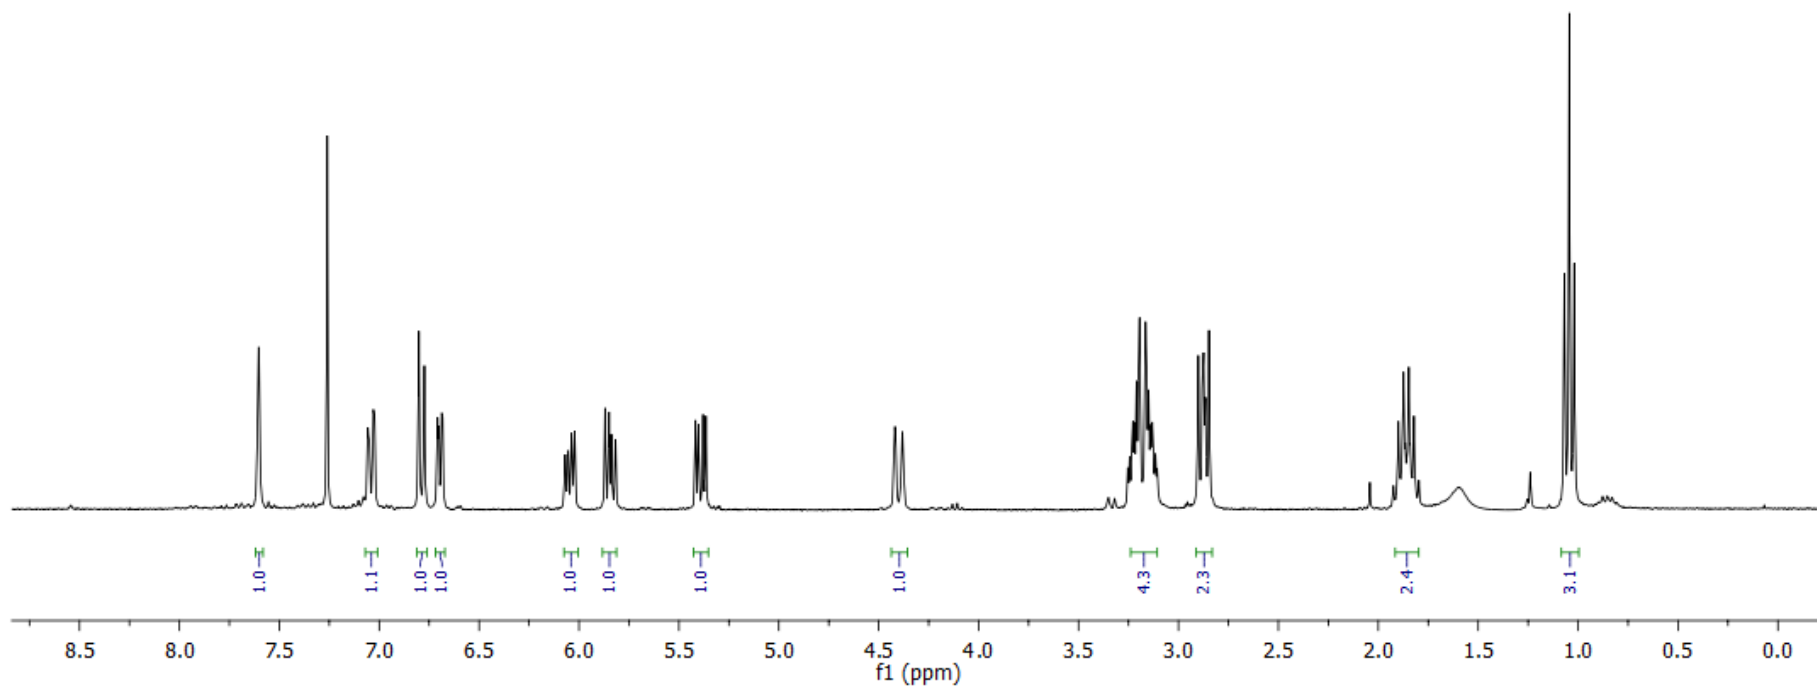

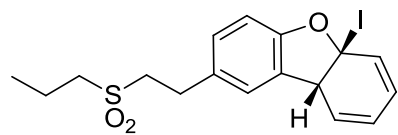

**11h**

CDCl<sub>3</sub>, 75 MHz

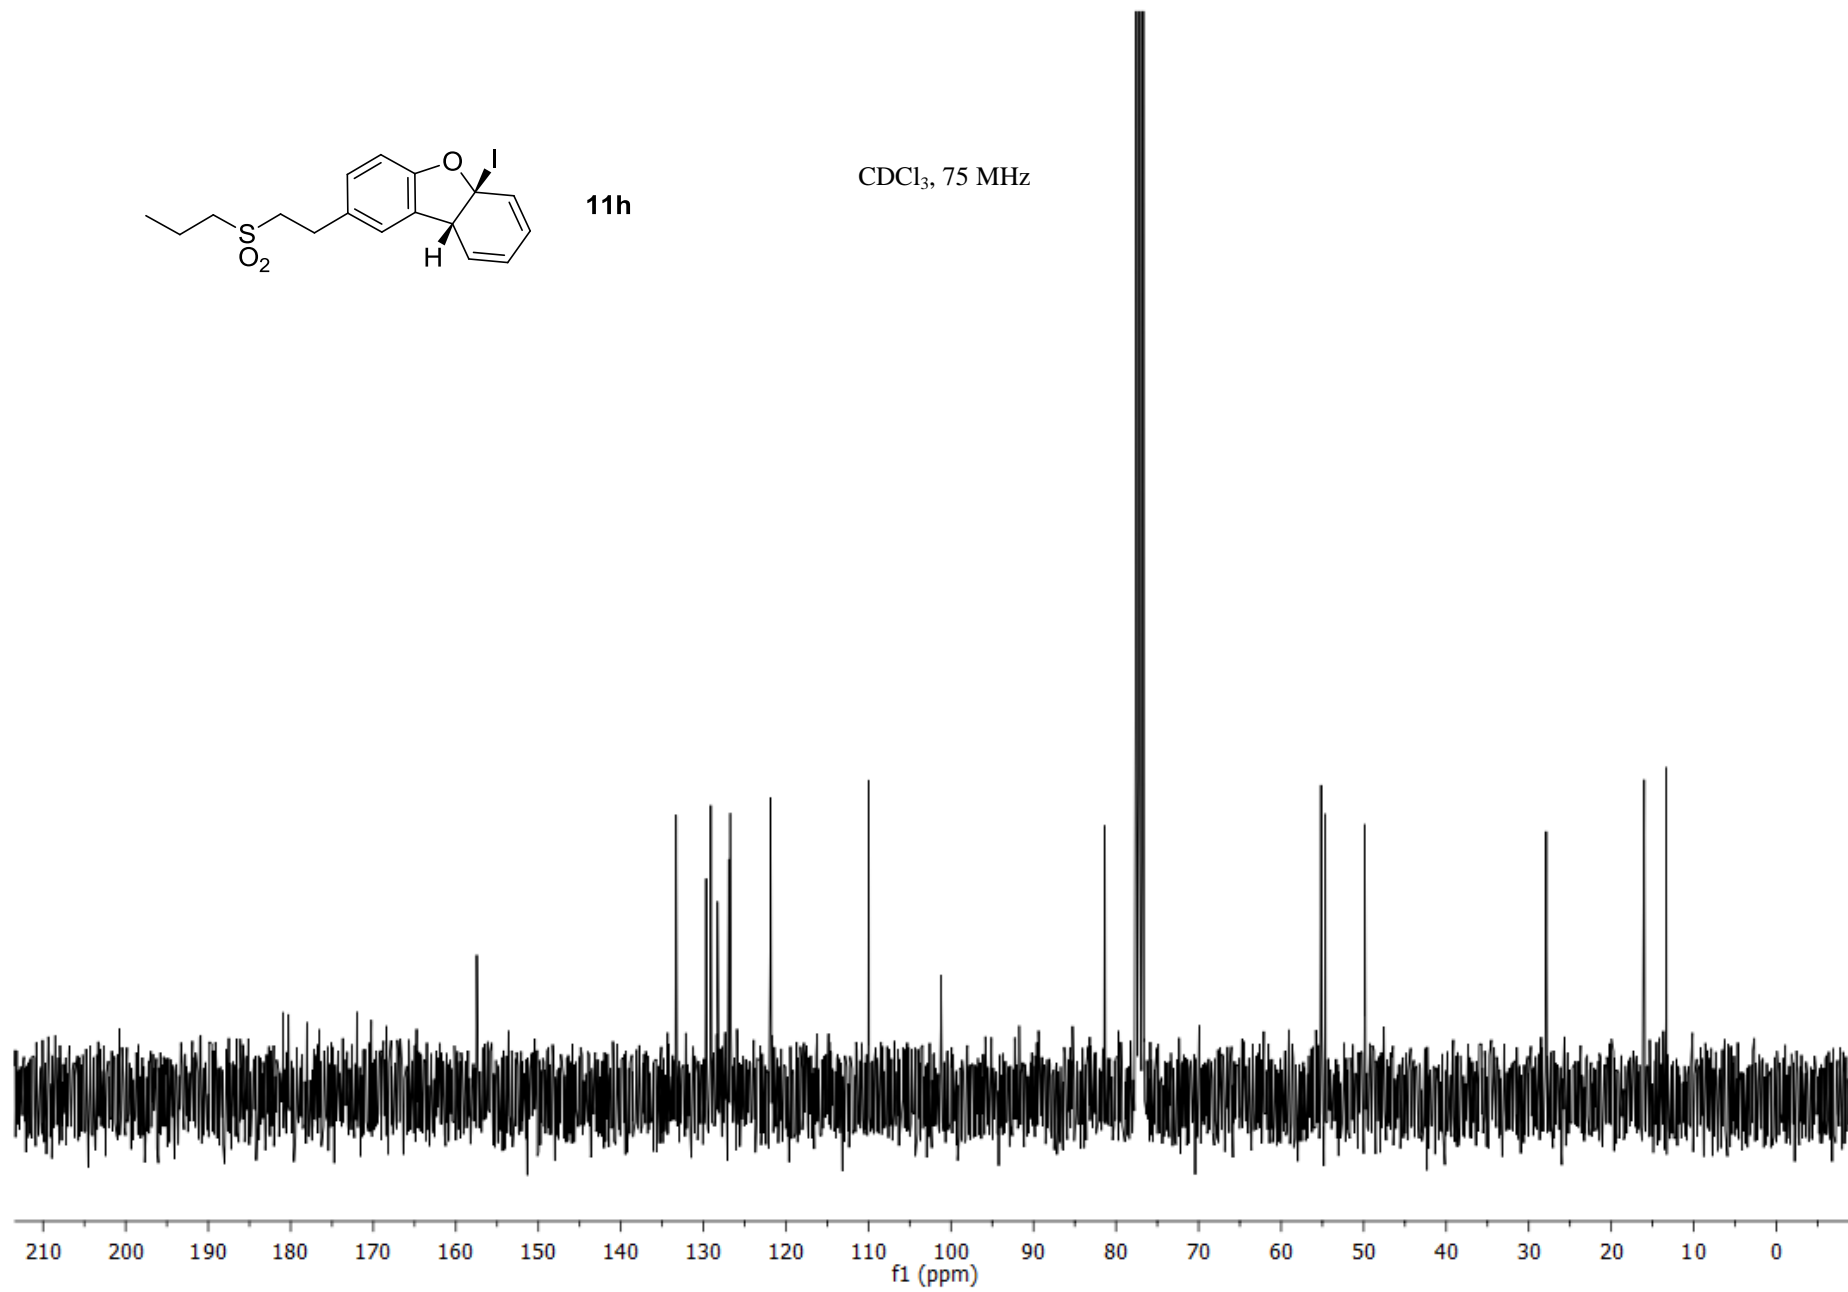

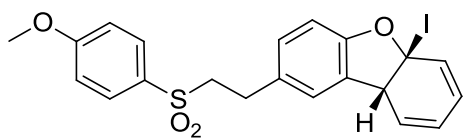

11i

CDCl<sub>3</sub>, 300 MHz

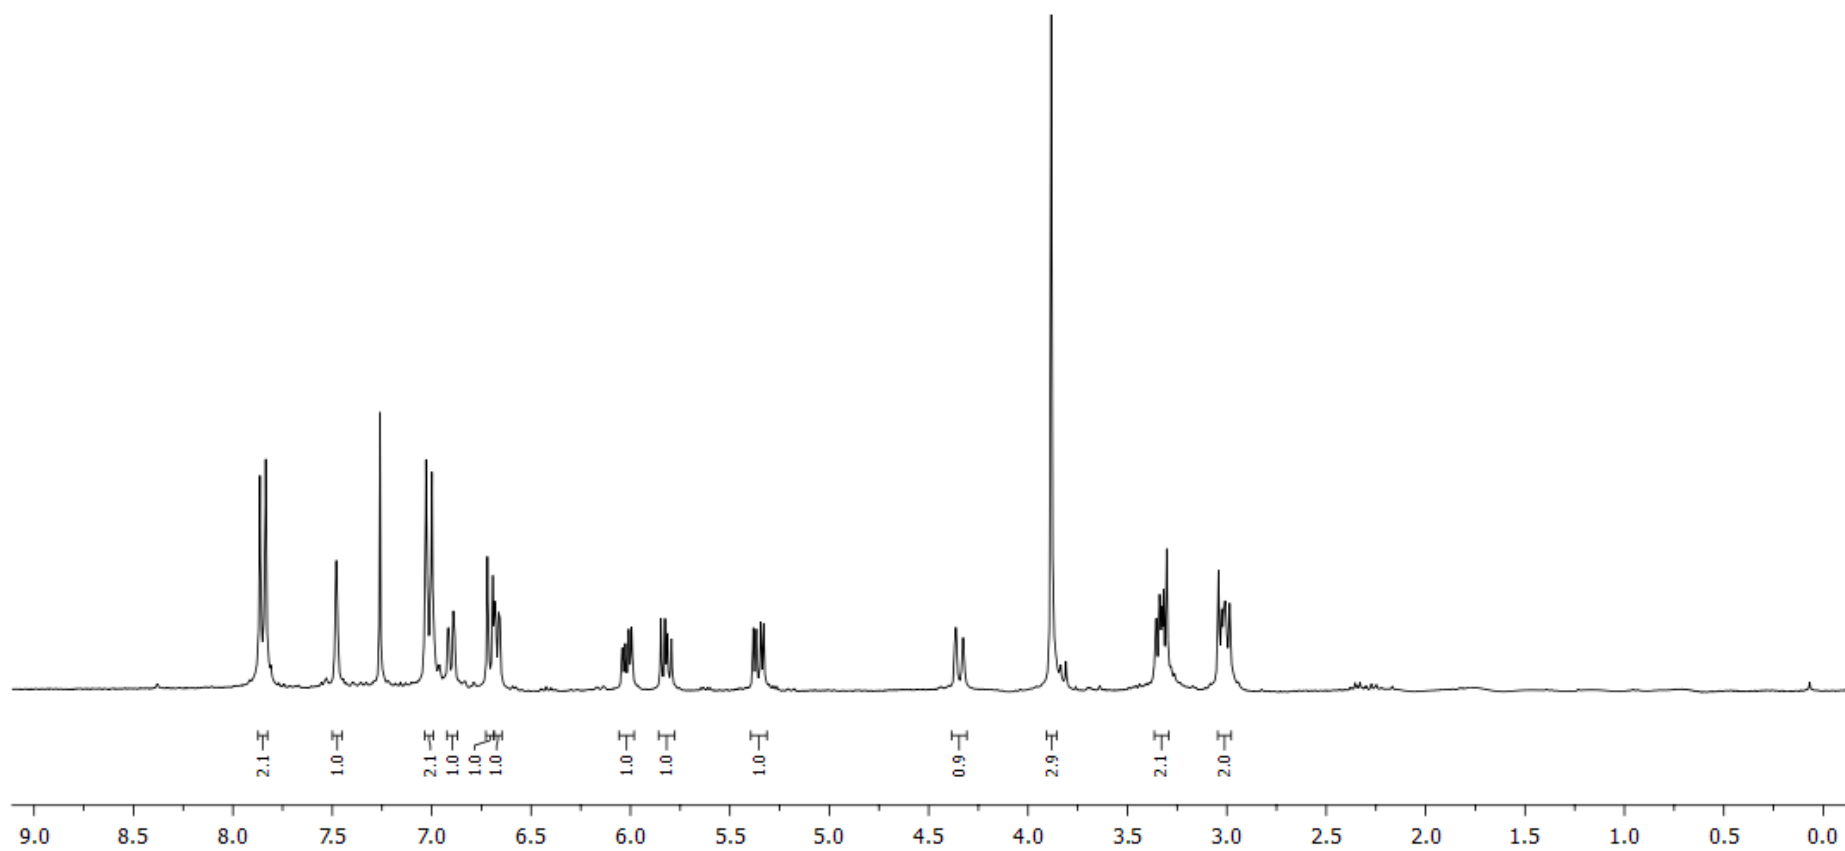



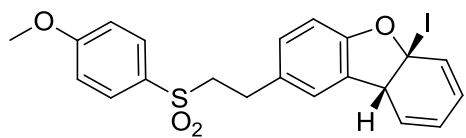

11i

CDCl<sub>3</sub>, 75 MHz

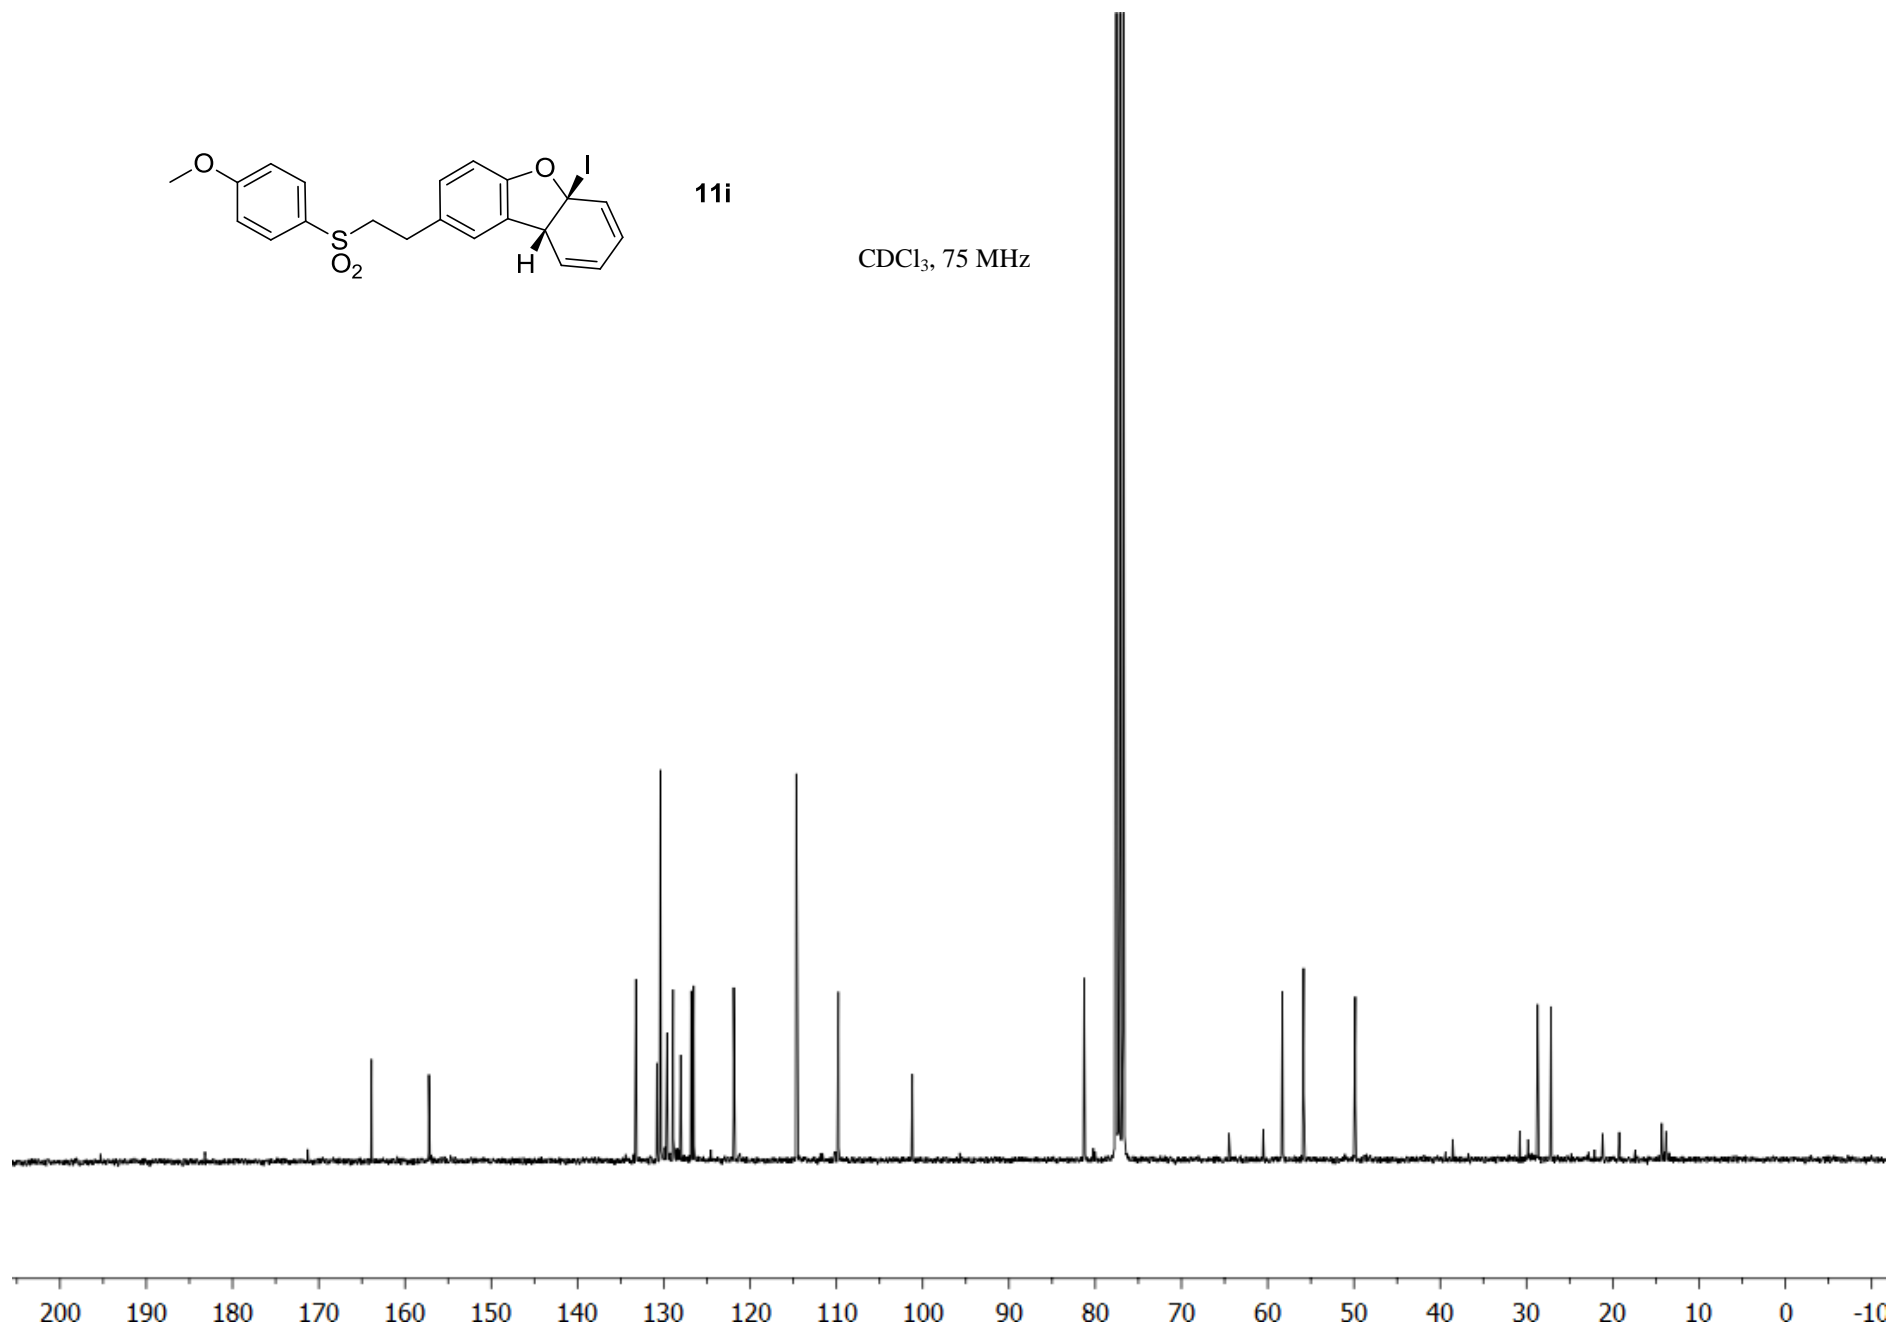

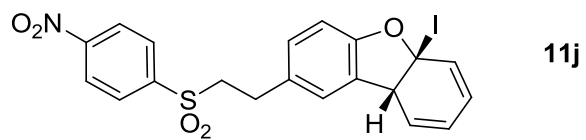

CDCl<sub>3</sub>, 300 MHz

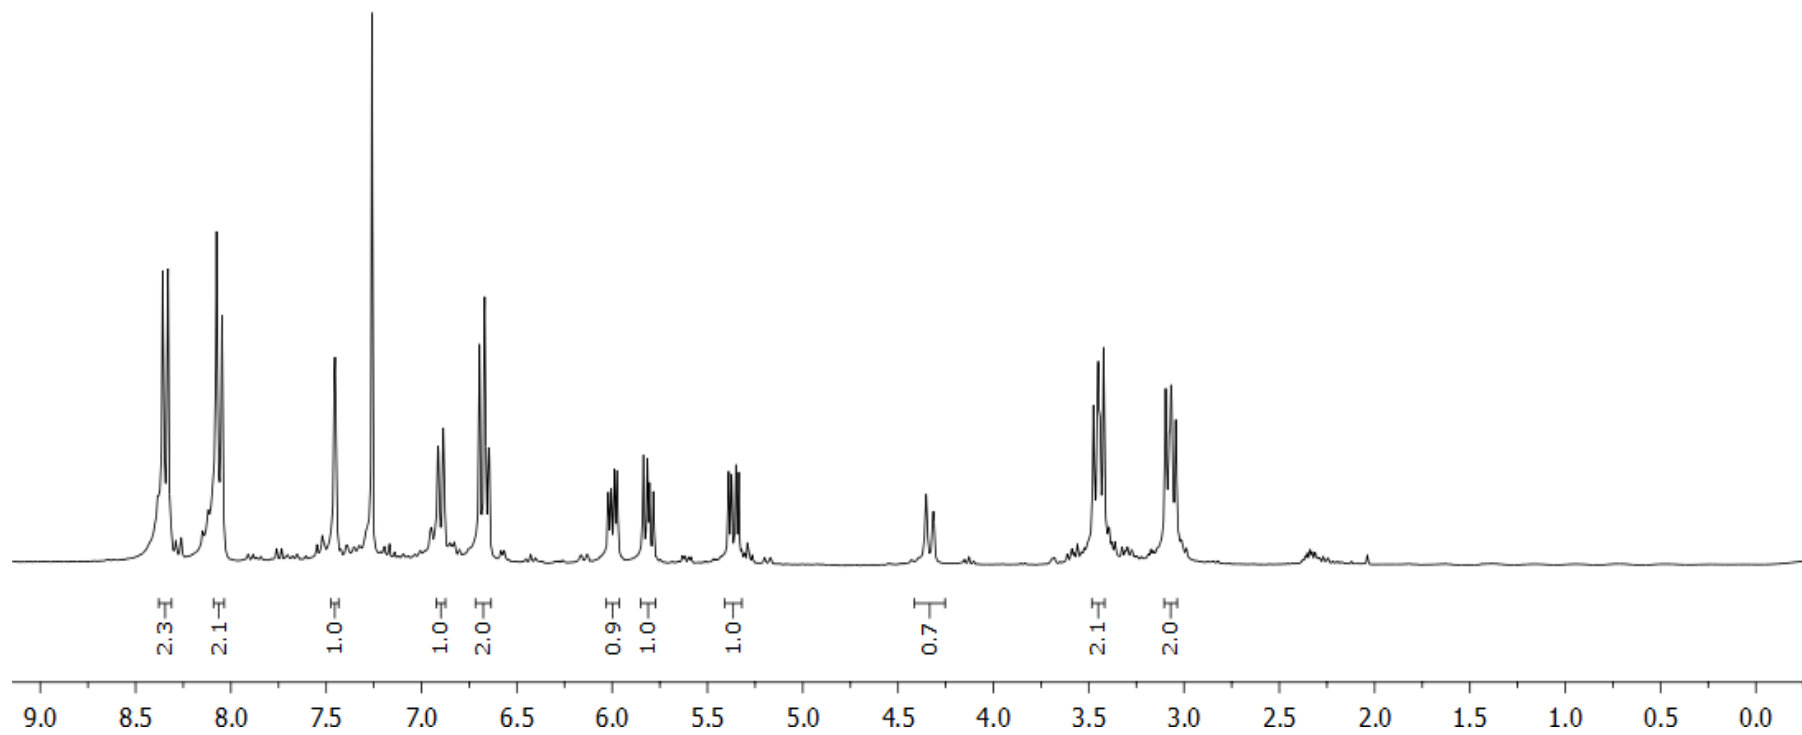

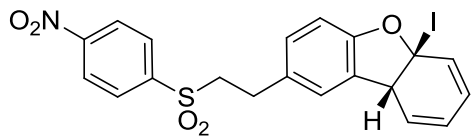

11j

CDCl<sub>3</sub>, 75 MHz

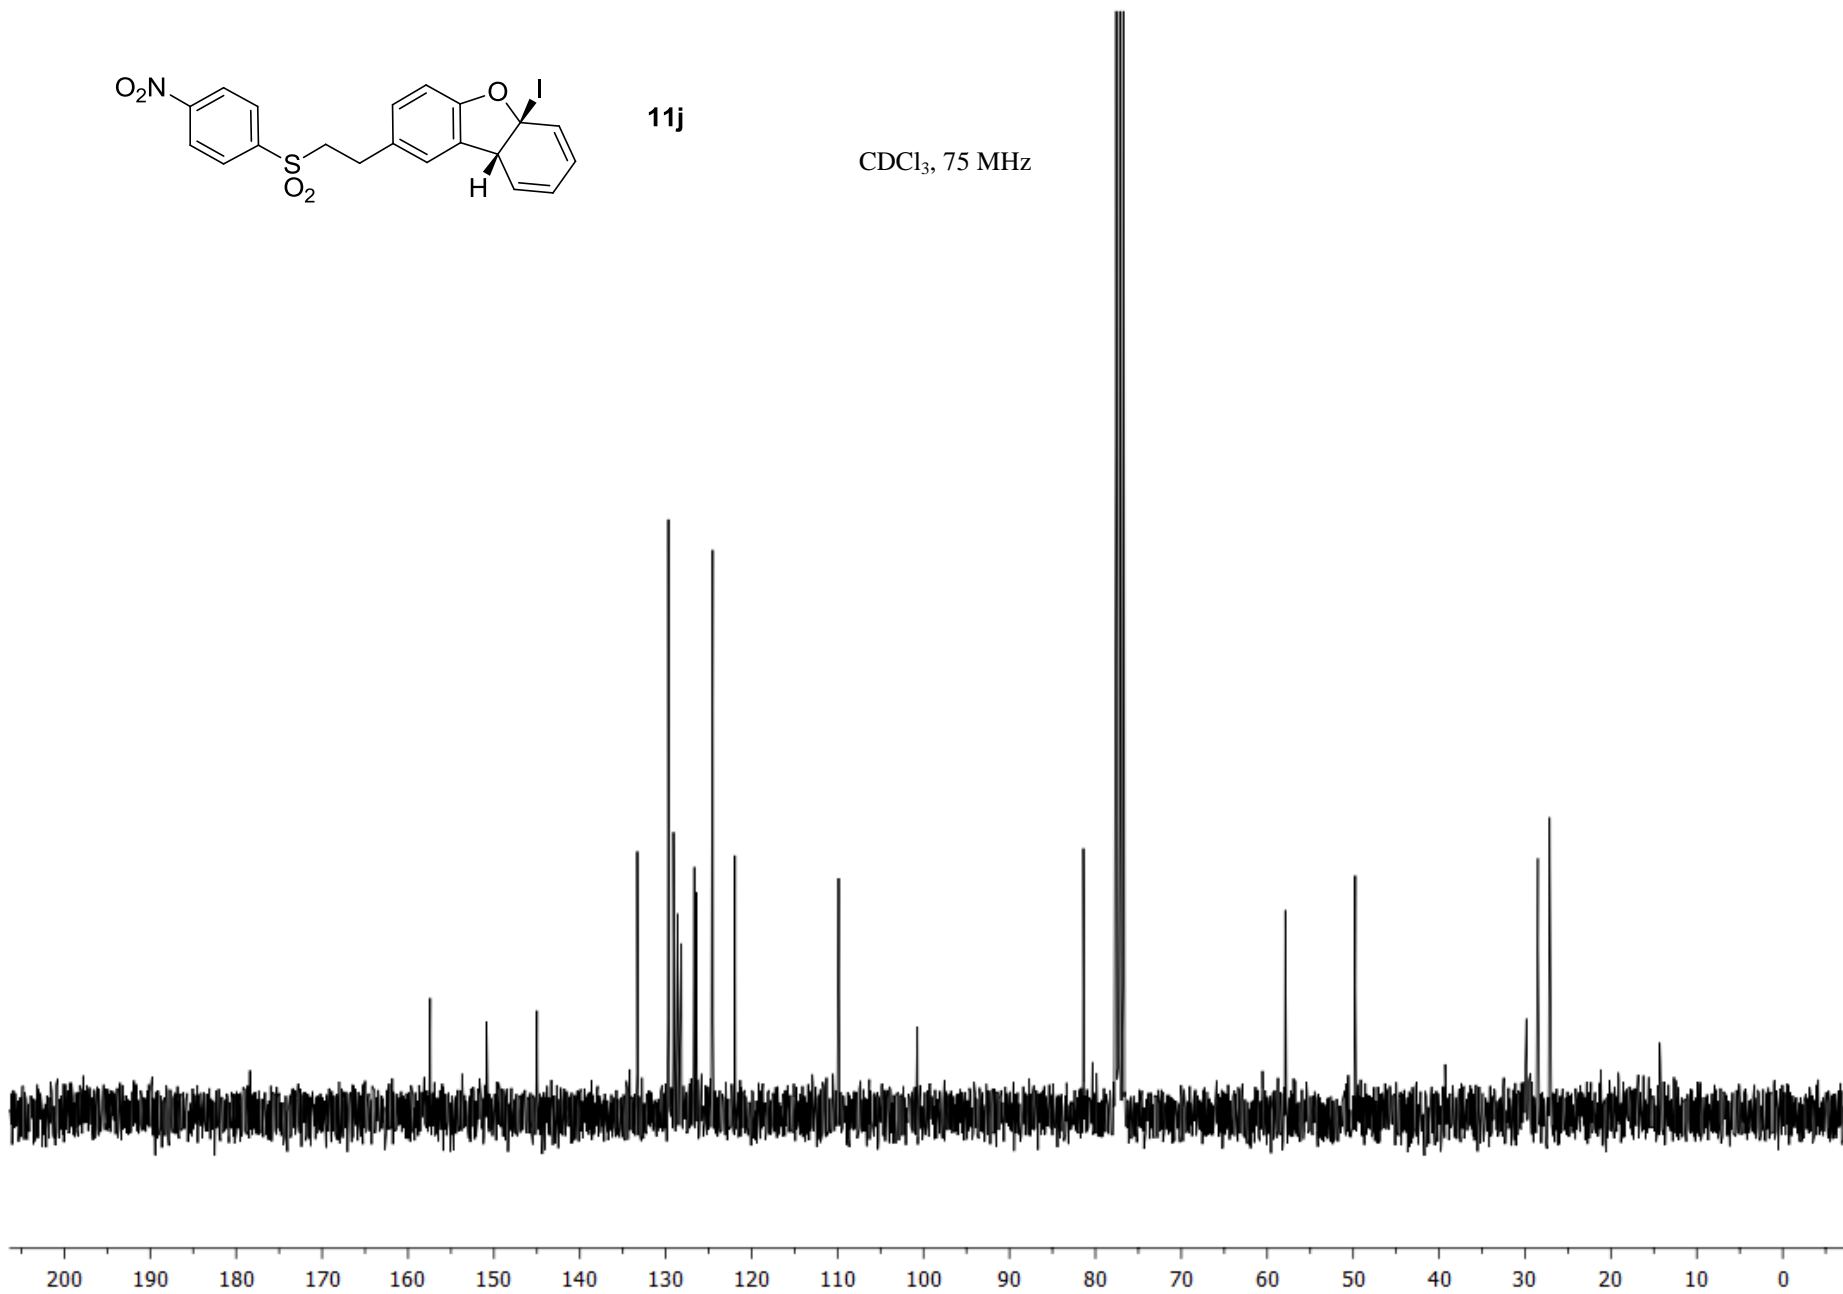

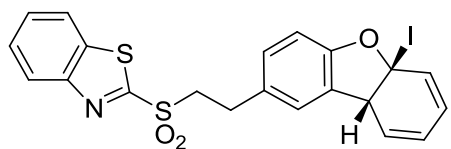

**11k**

CDCl<sub>3</sub>, 300 MHz

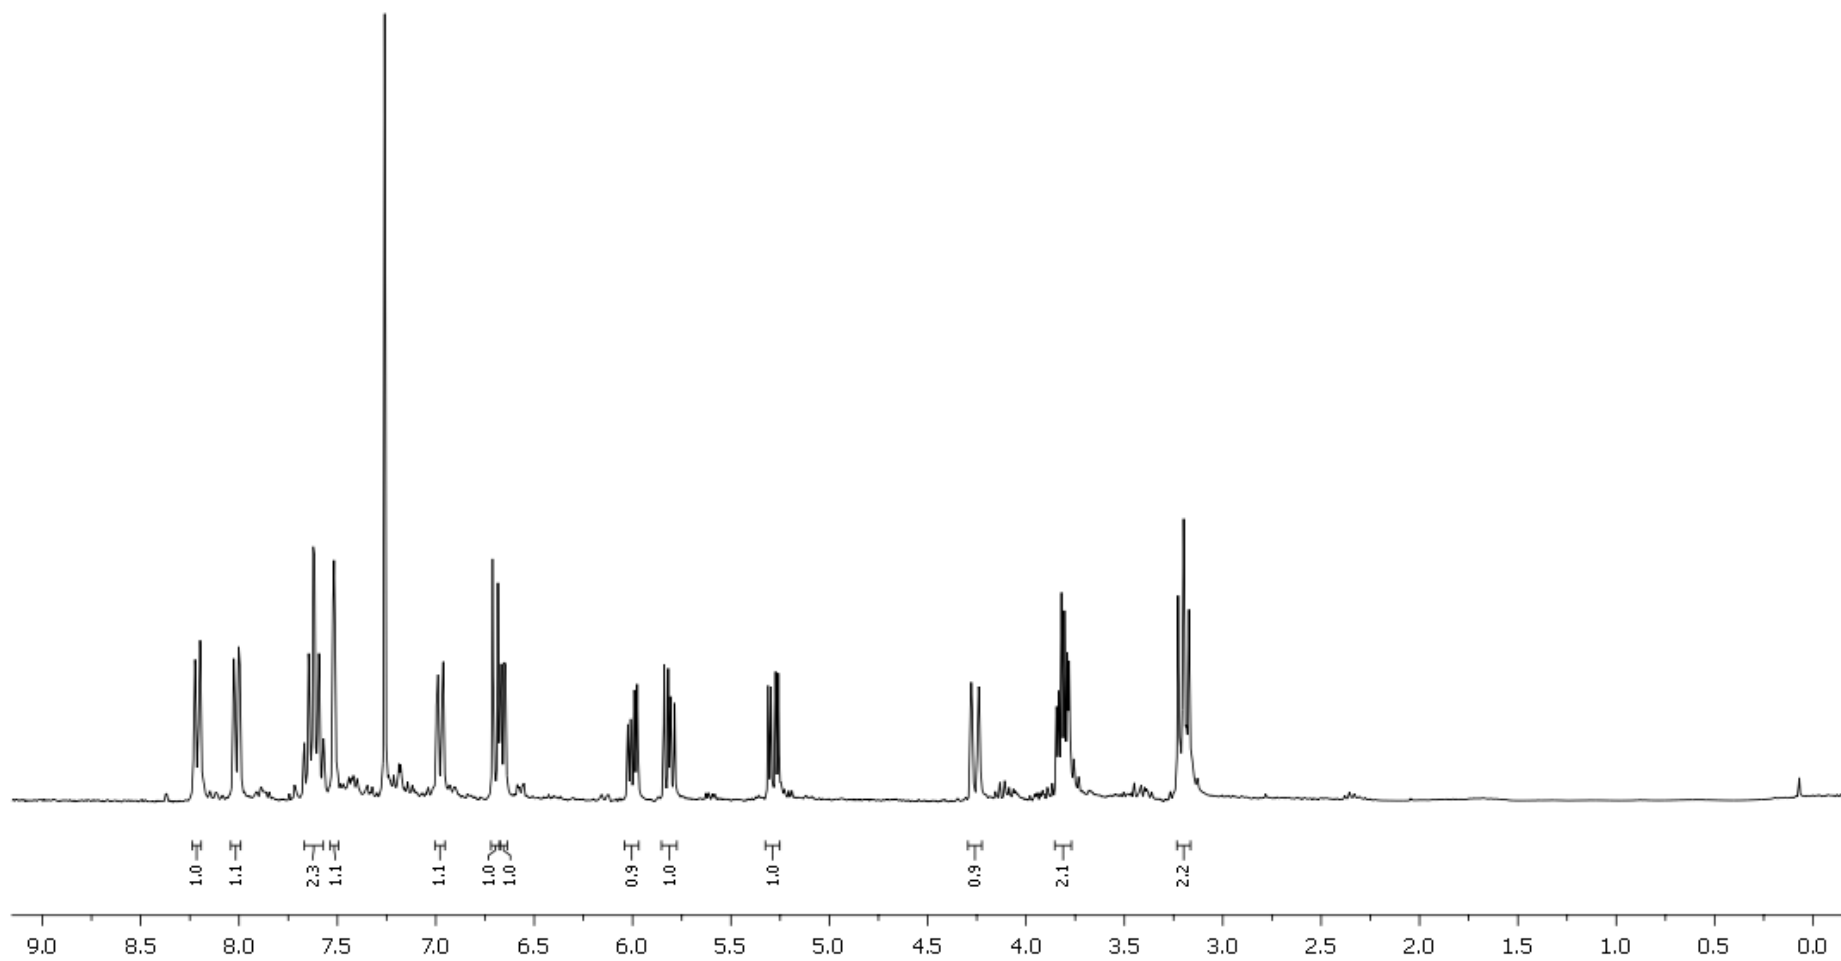

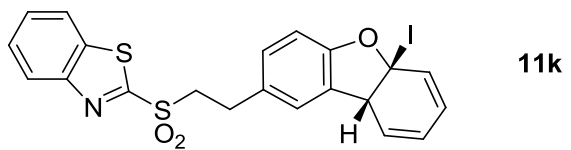

CDCl<sub>3</sub>, 75 MHz

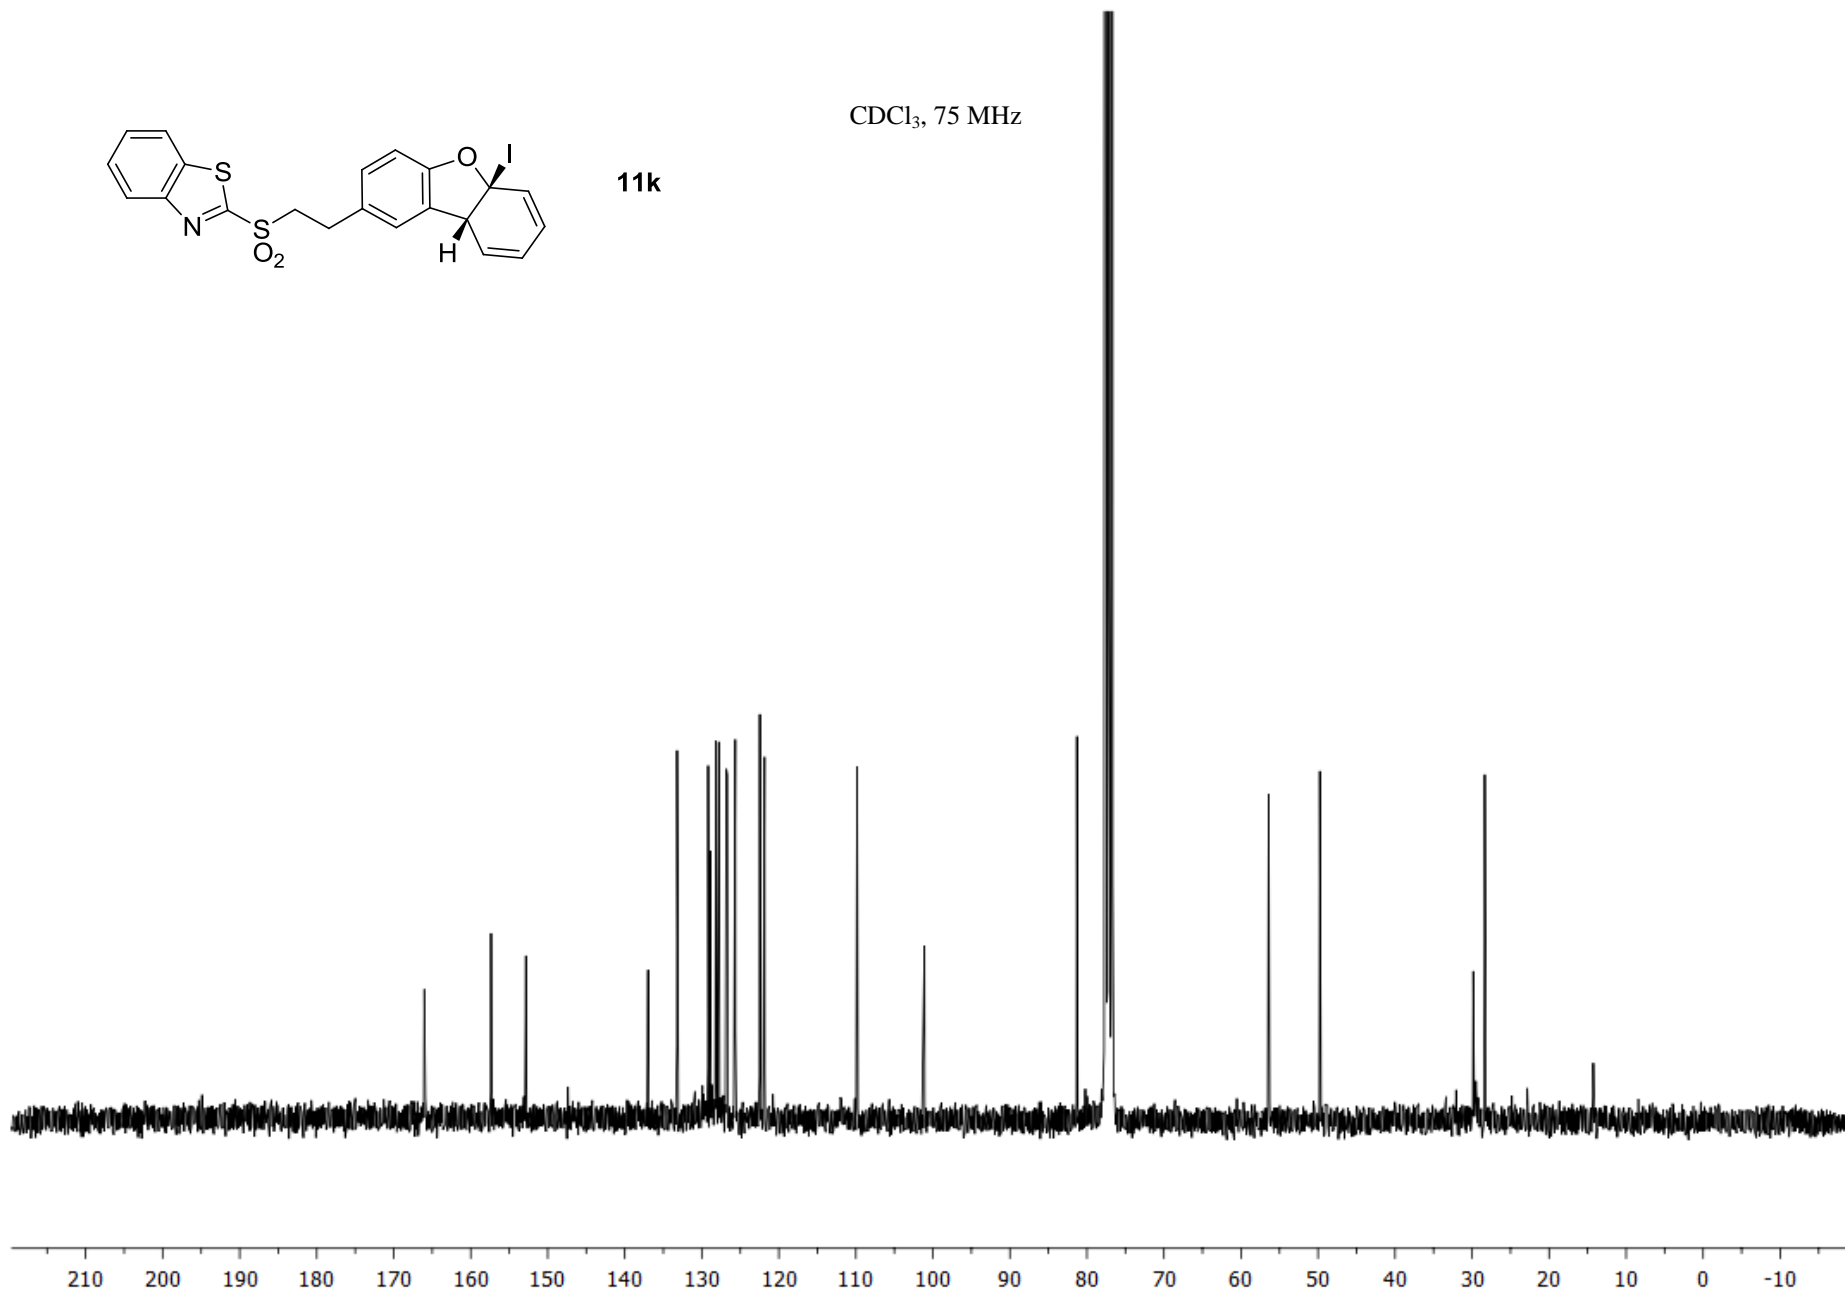

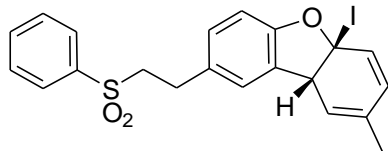

**12b**

CDCl<sub>3</sub>, 300 MHz

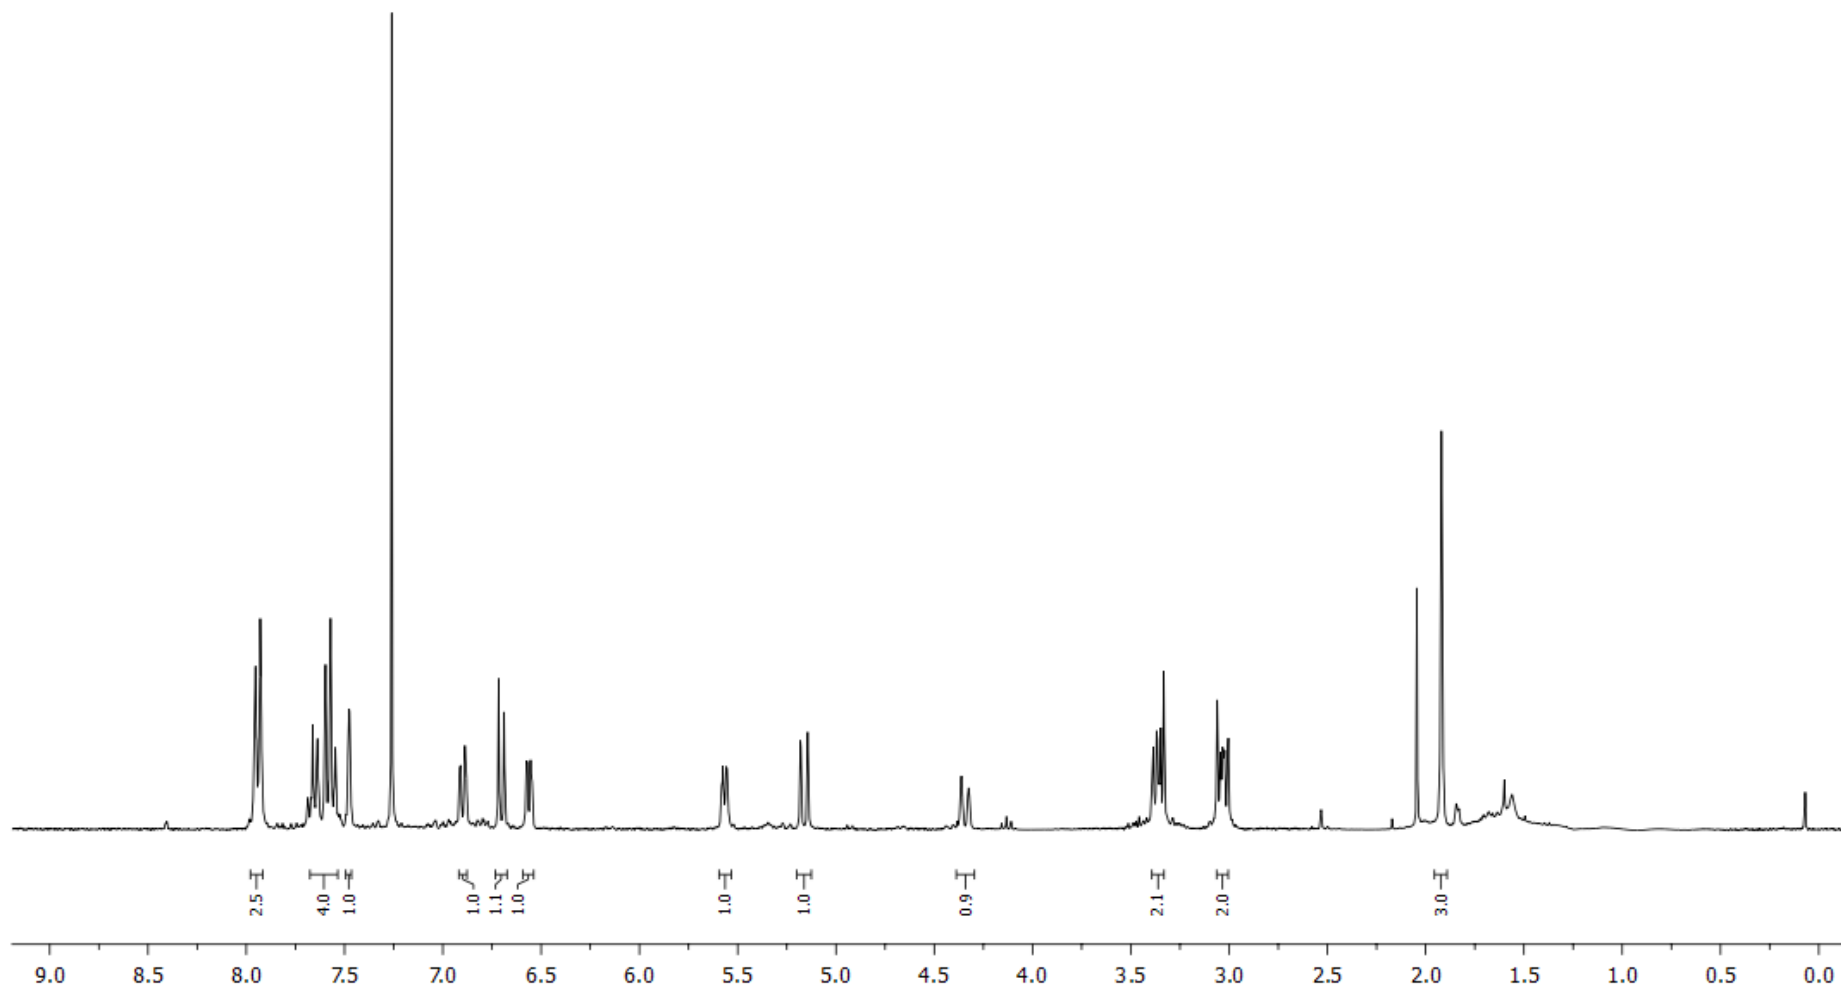

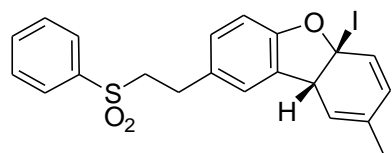

**12b**

CDCl<sub>3</sub>, 75 MHz

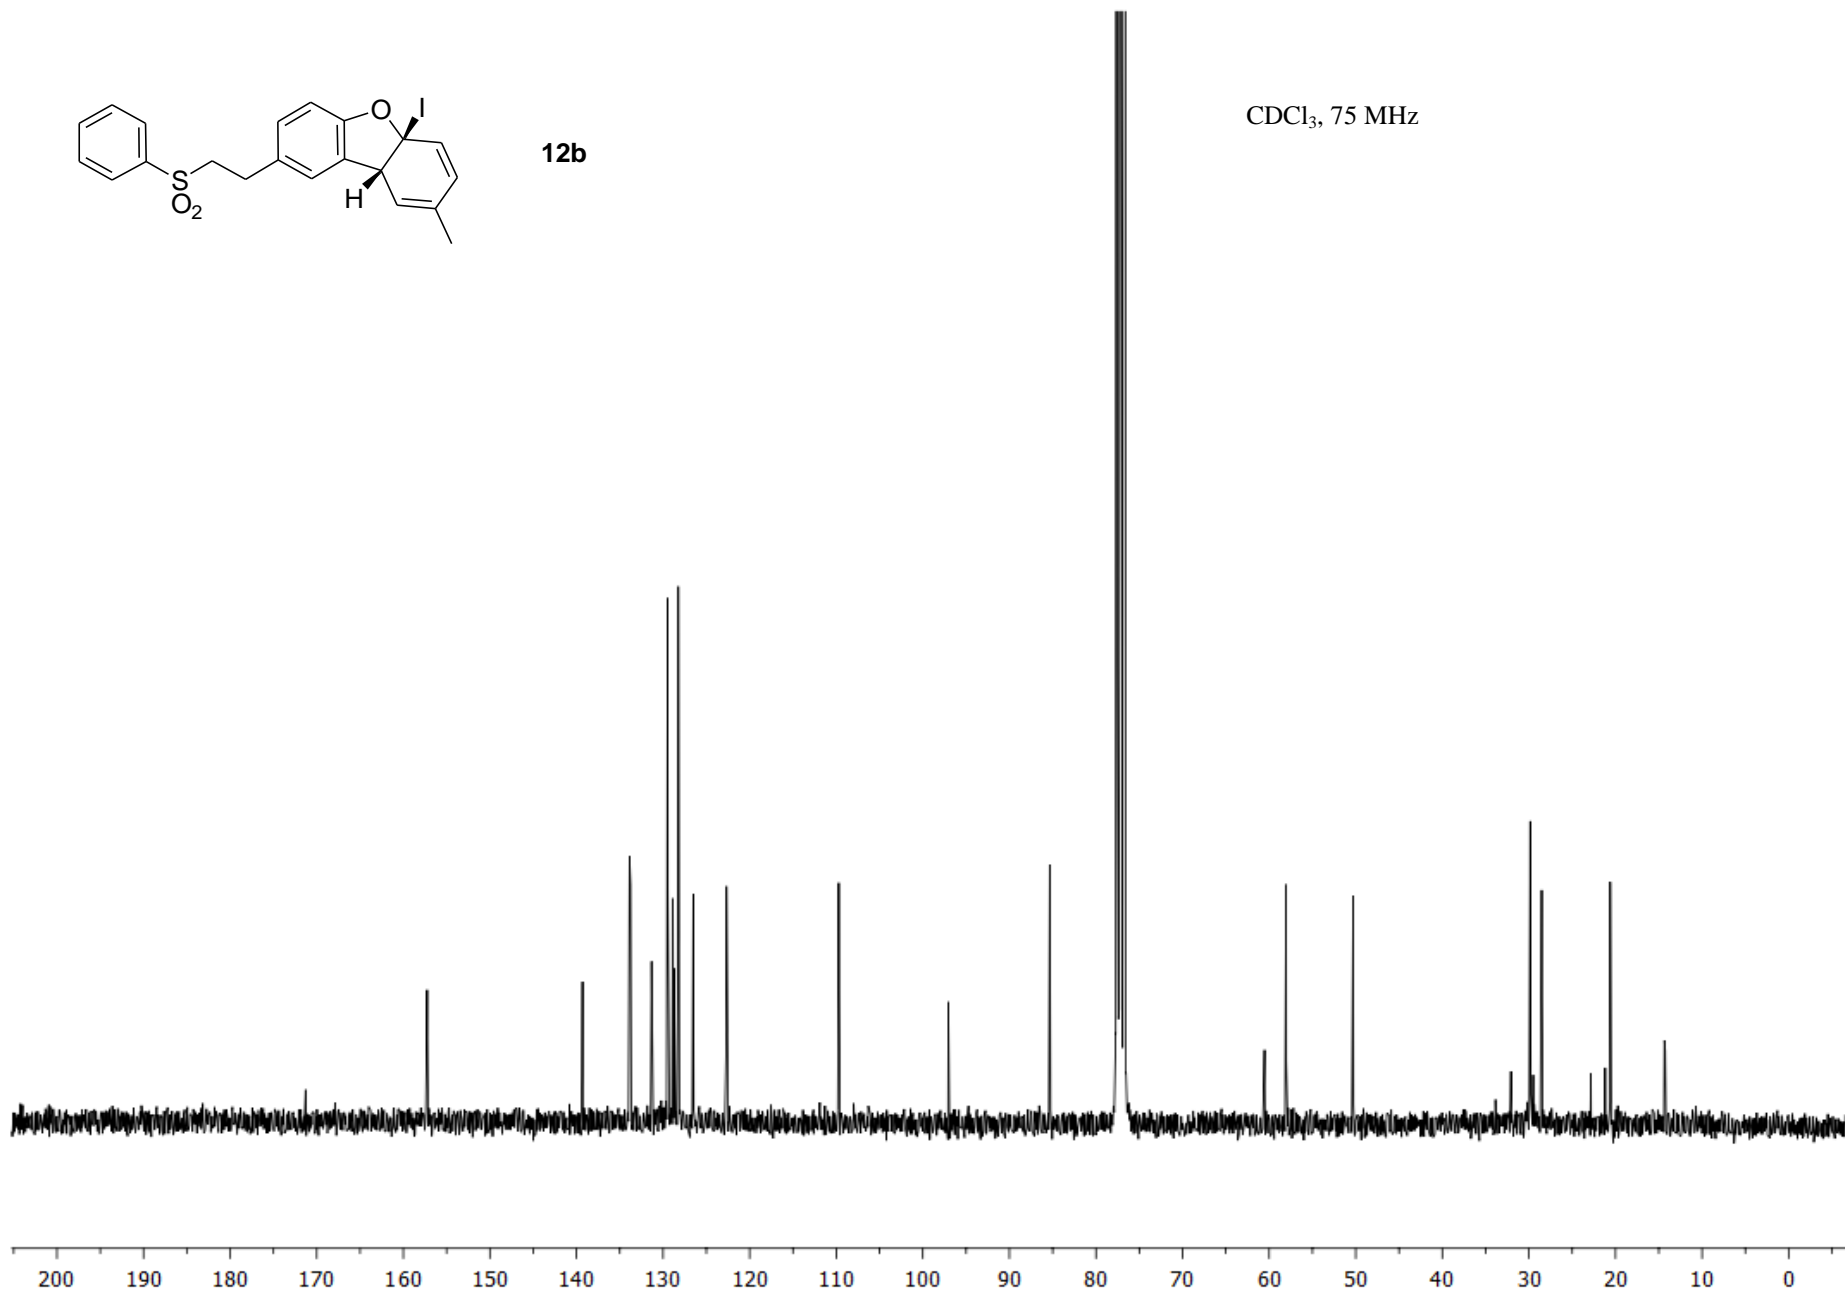

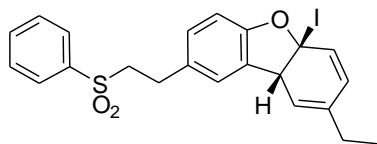

12c

CDCl<sub>3</sub>, 300 MHz

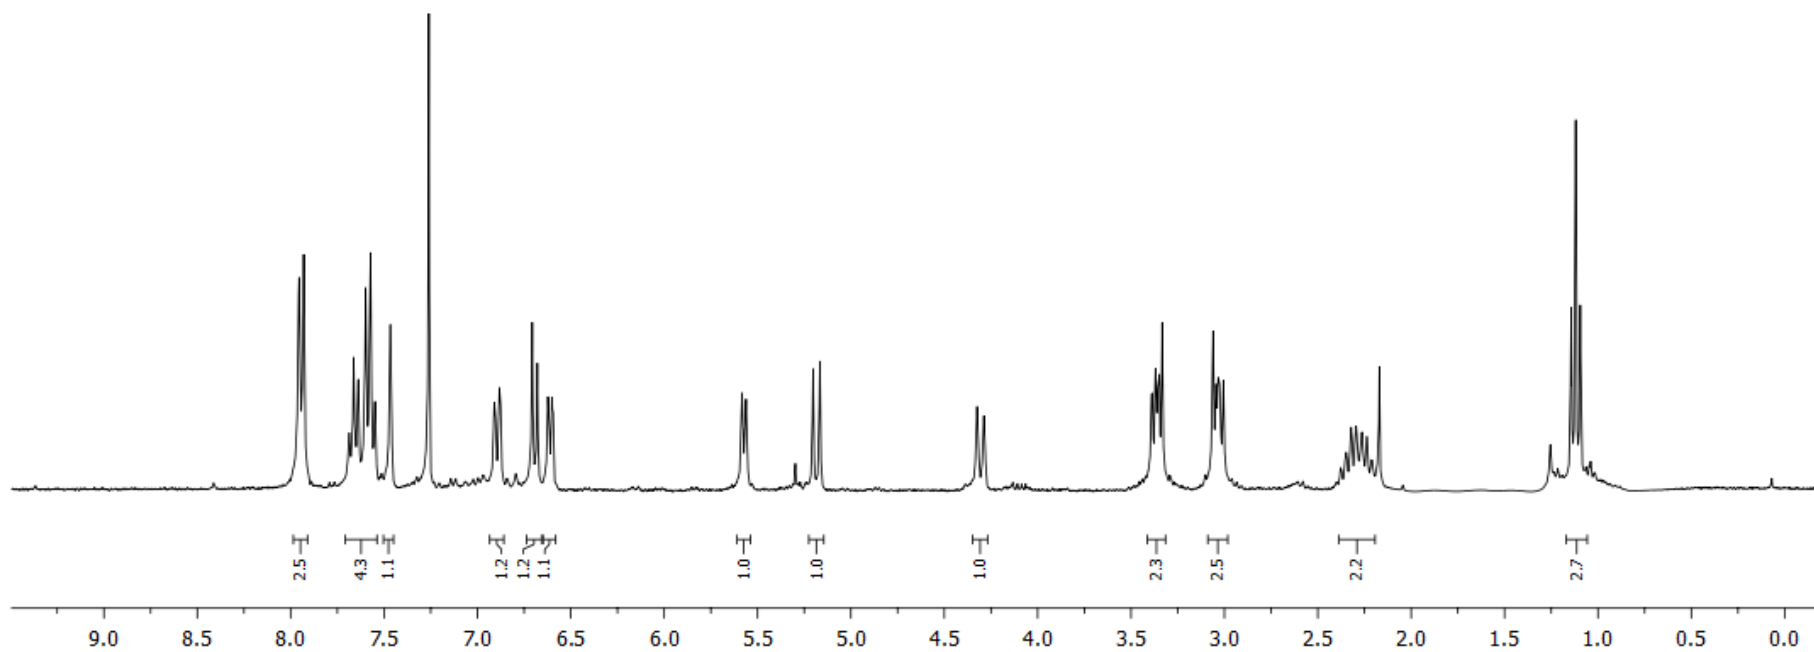



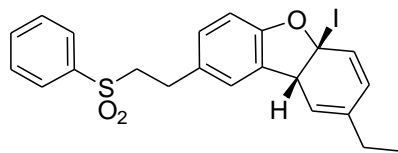

**12c**

CDCl<sub>3</sub>, 75 MHz

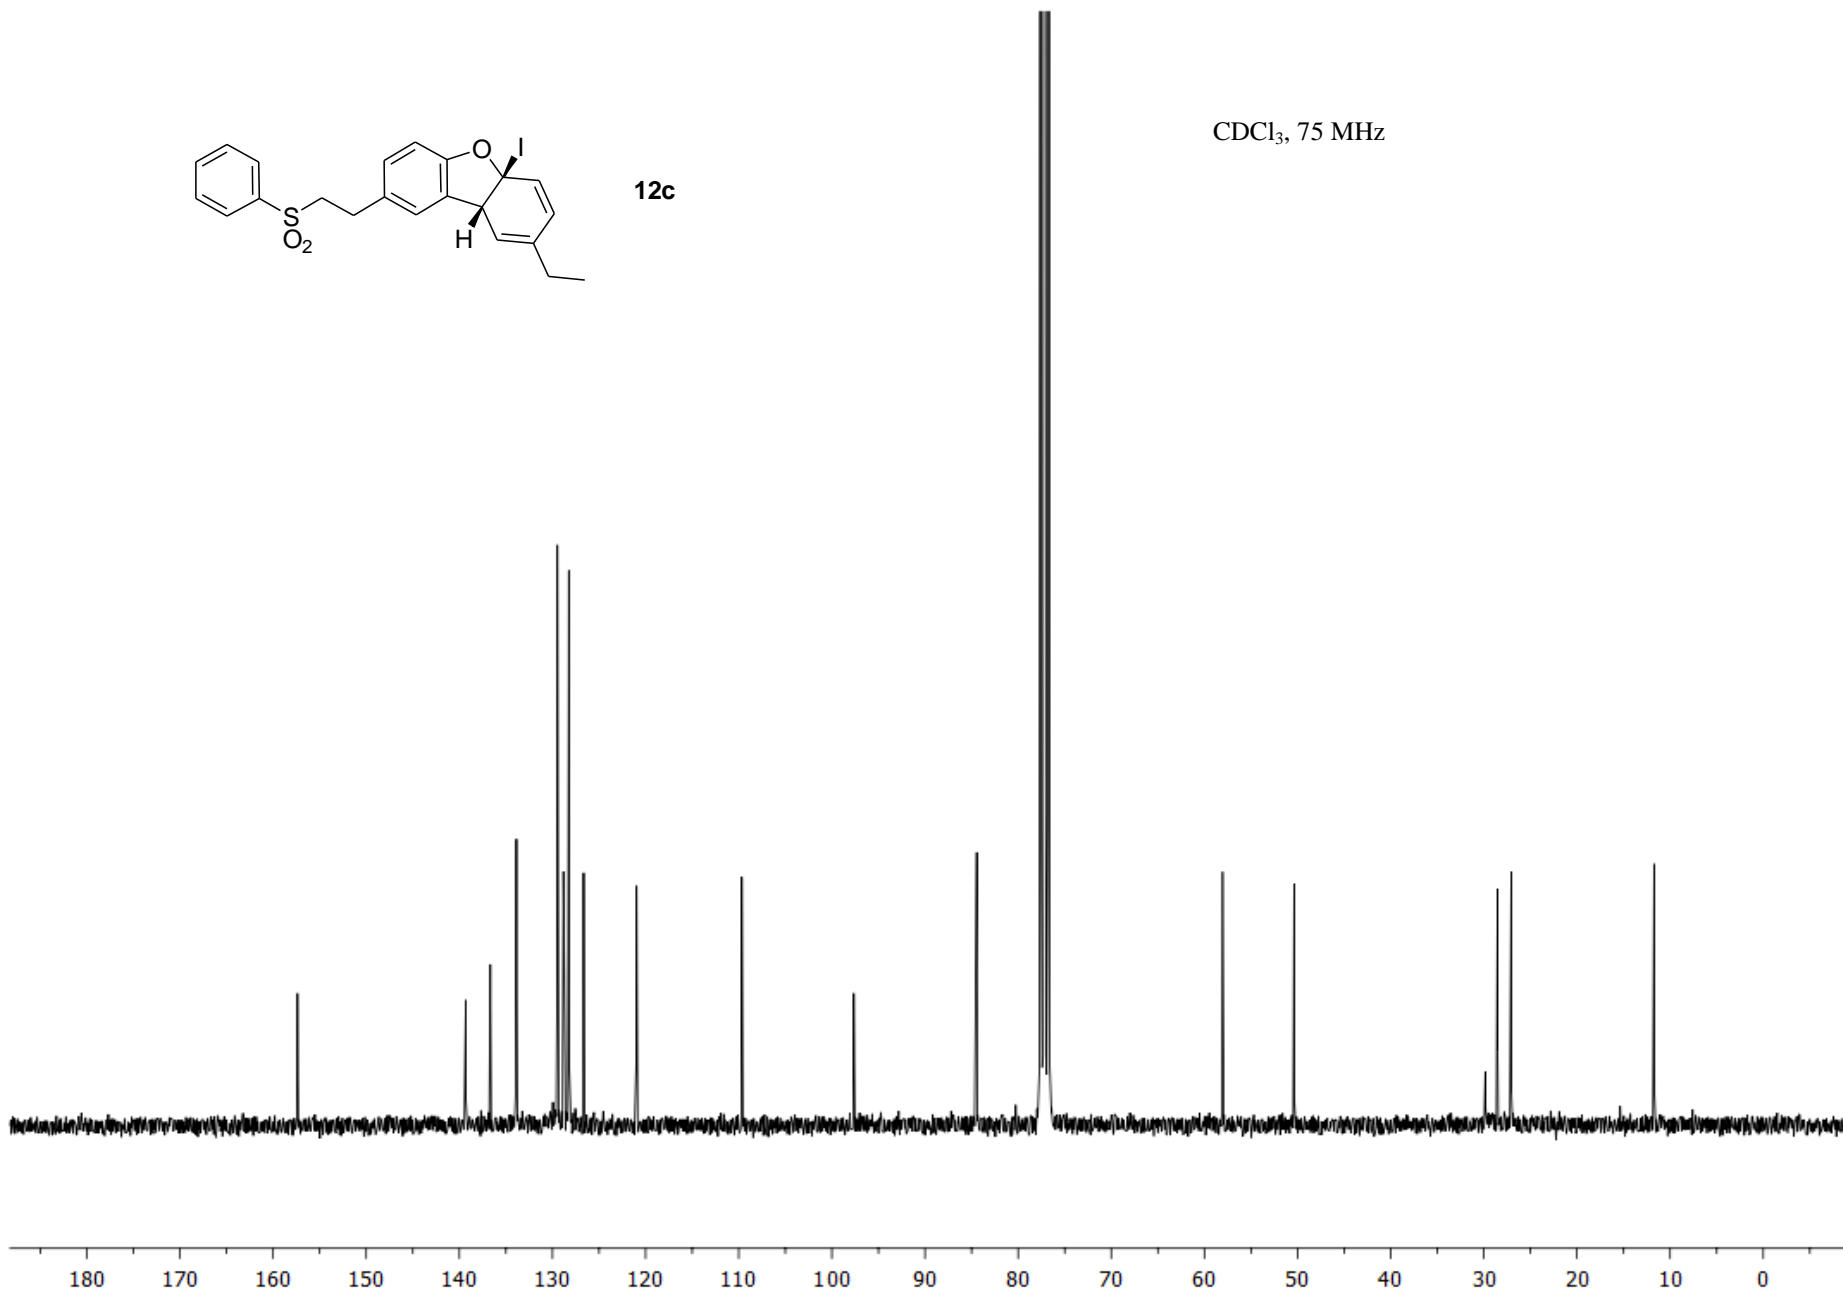

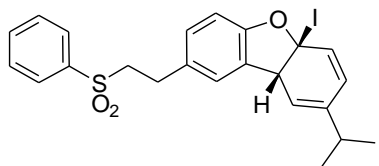

12d

CDCl<sub>3</sub>, 300 MHz

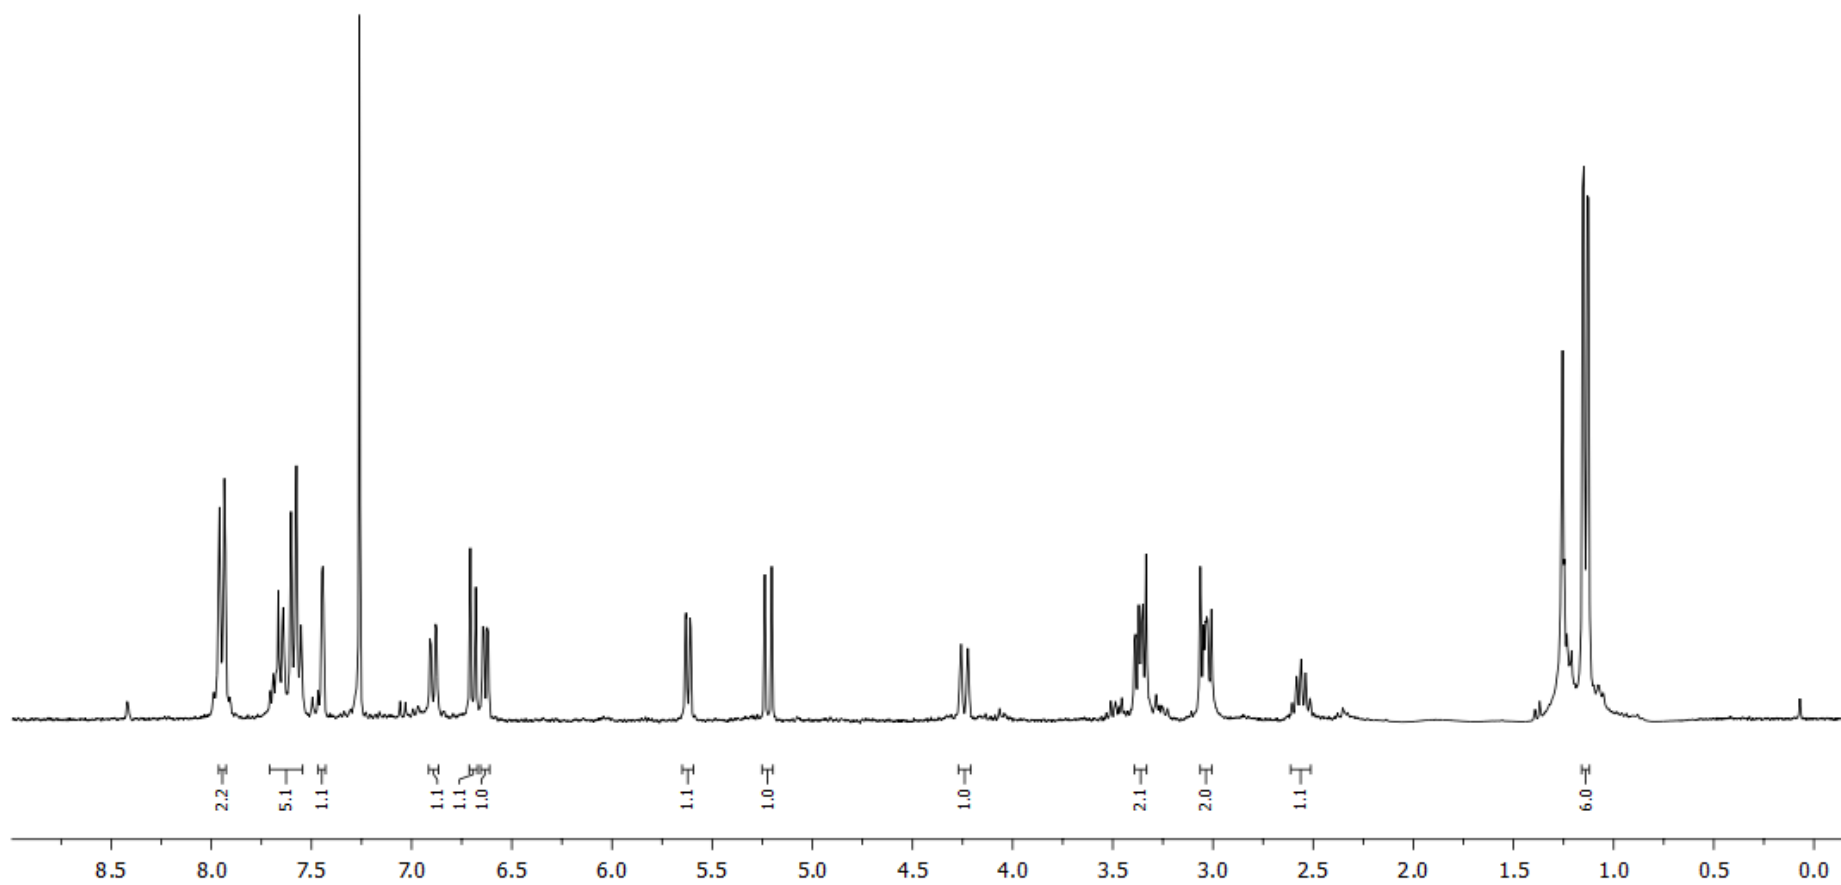

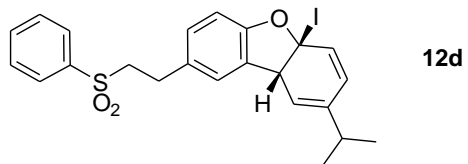

CDCl<sub>3</sub>, 75 MHz

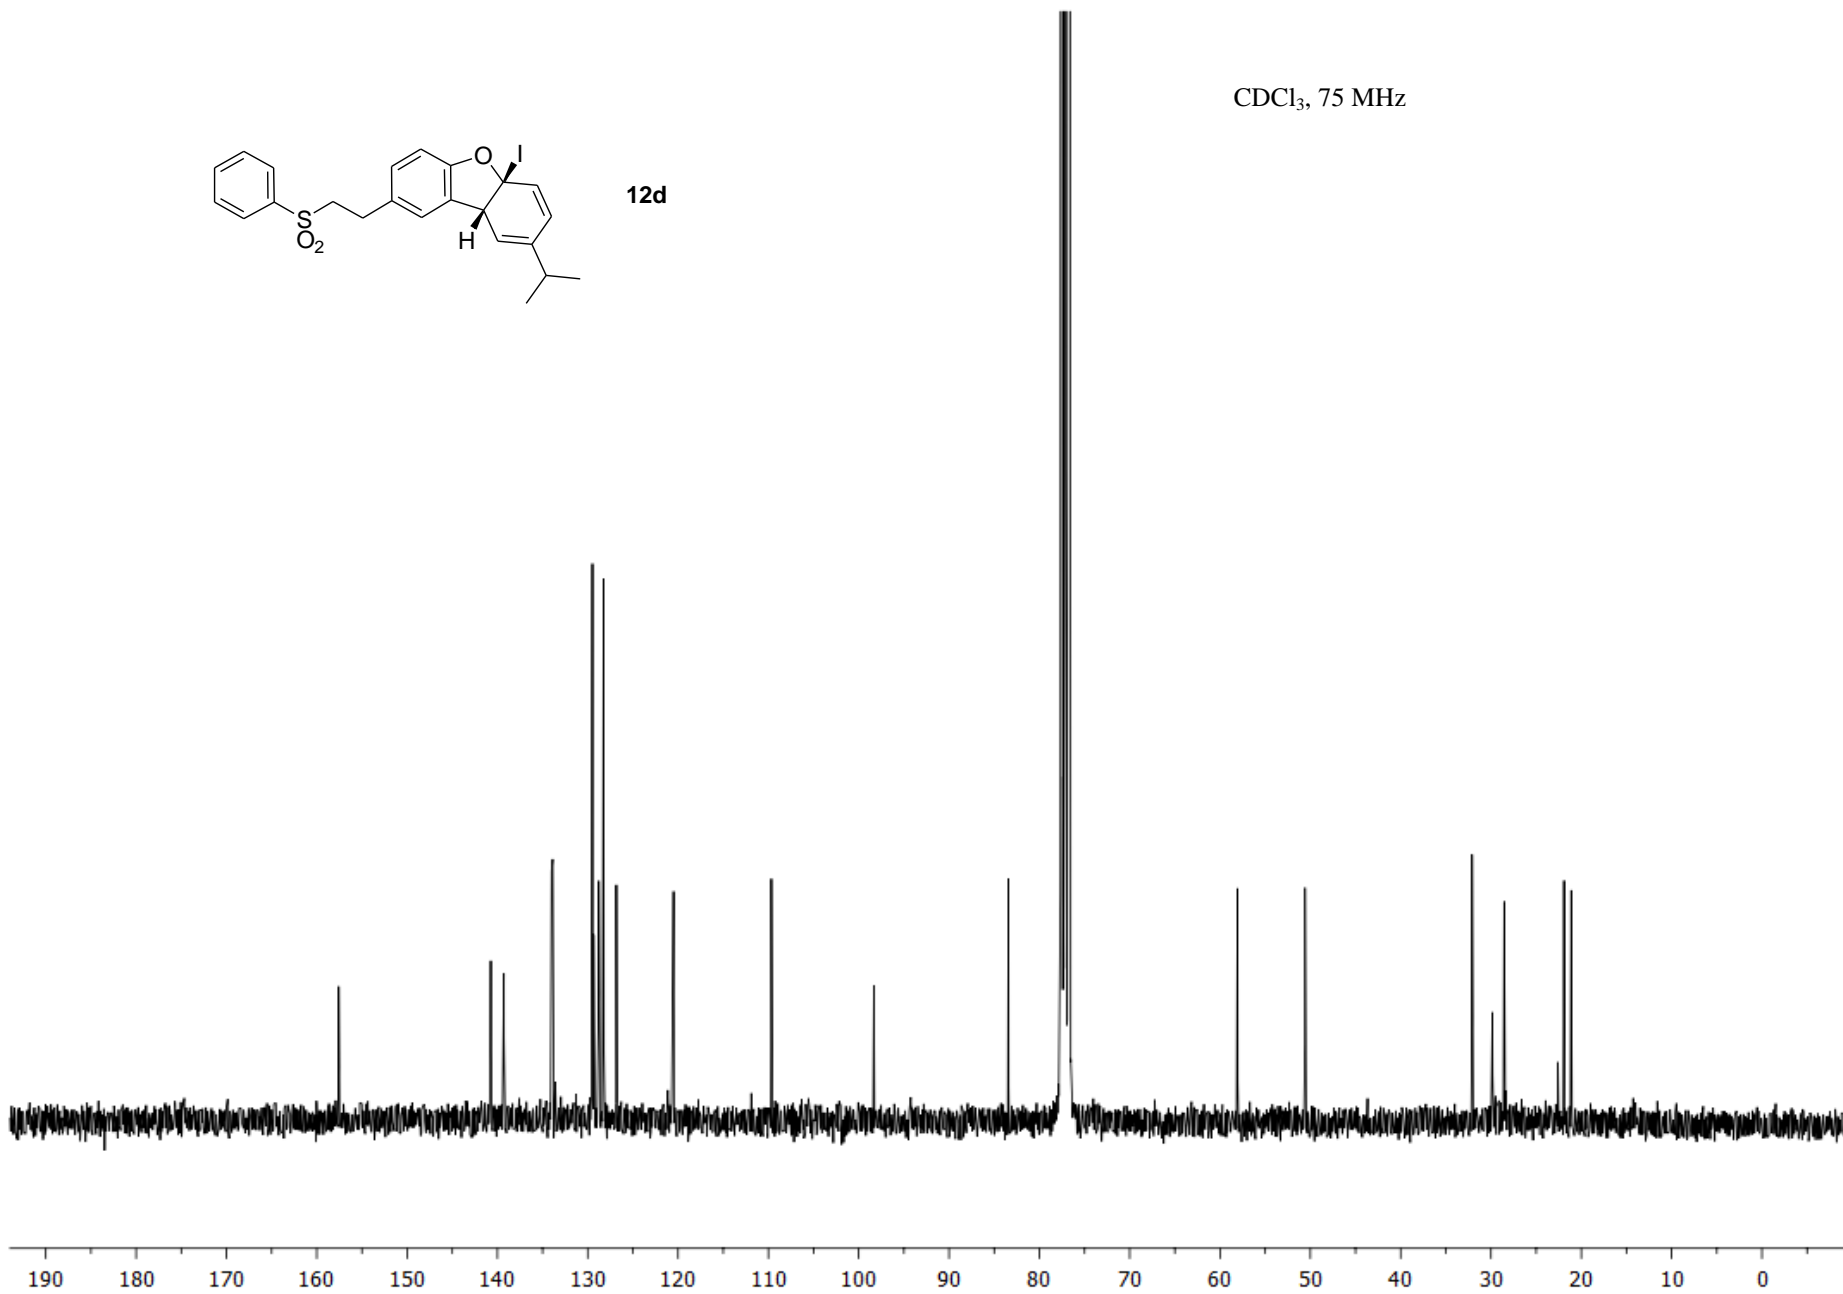

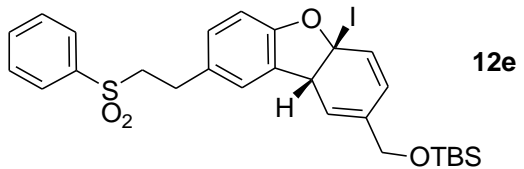

CDCl<sub>3</sub>, 300 MHz

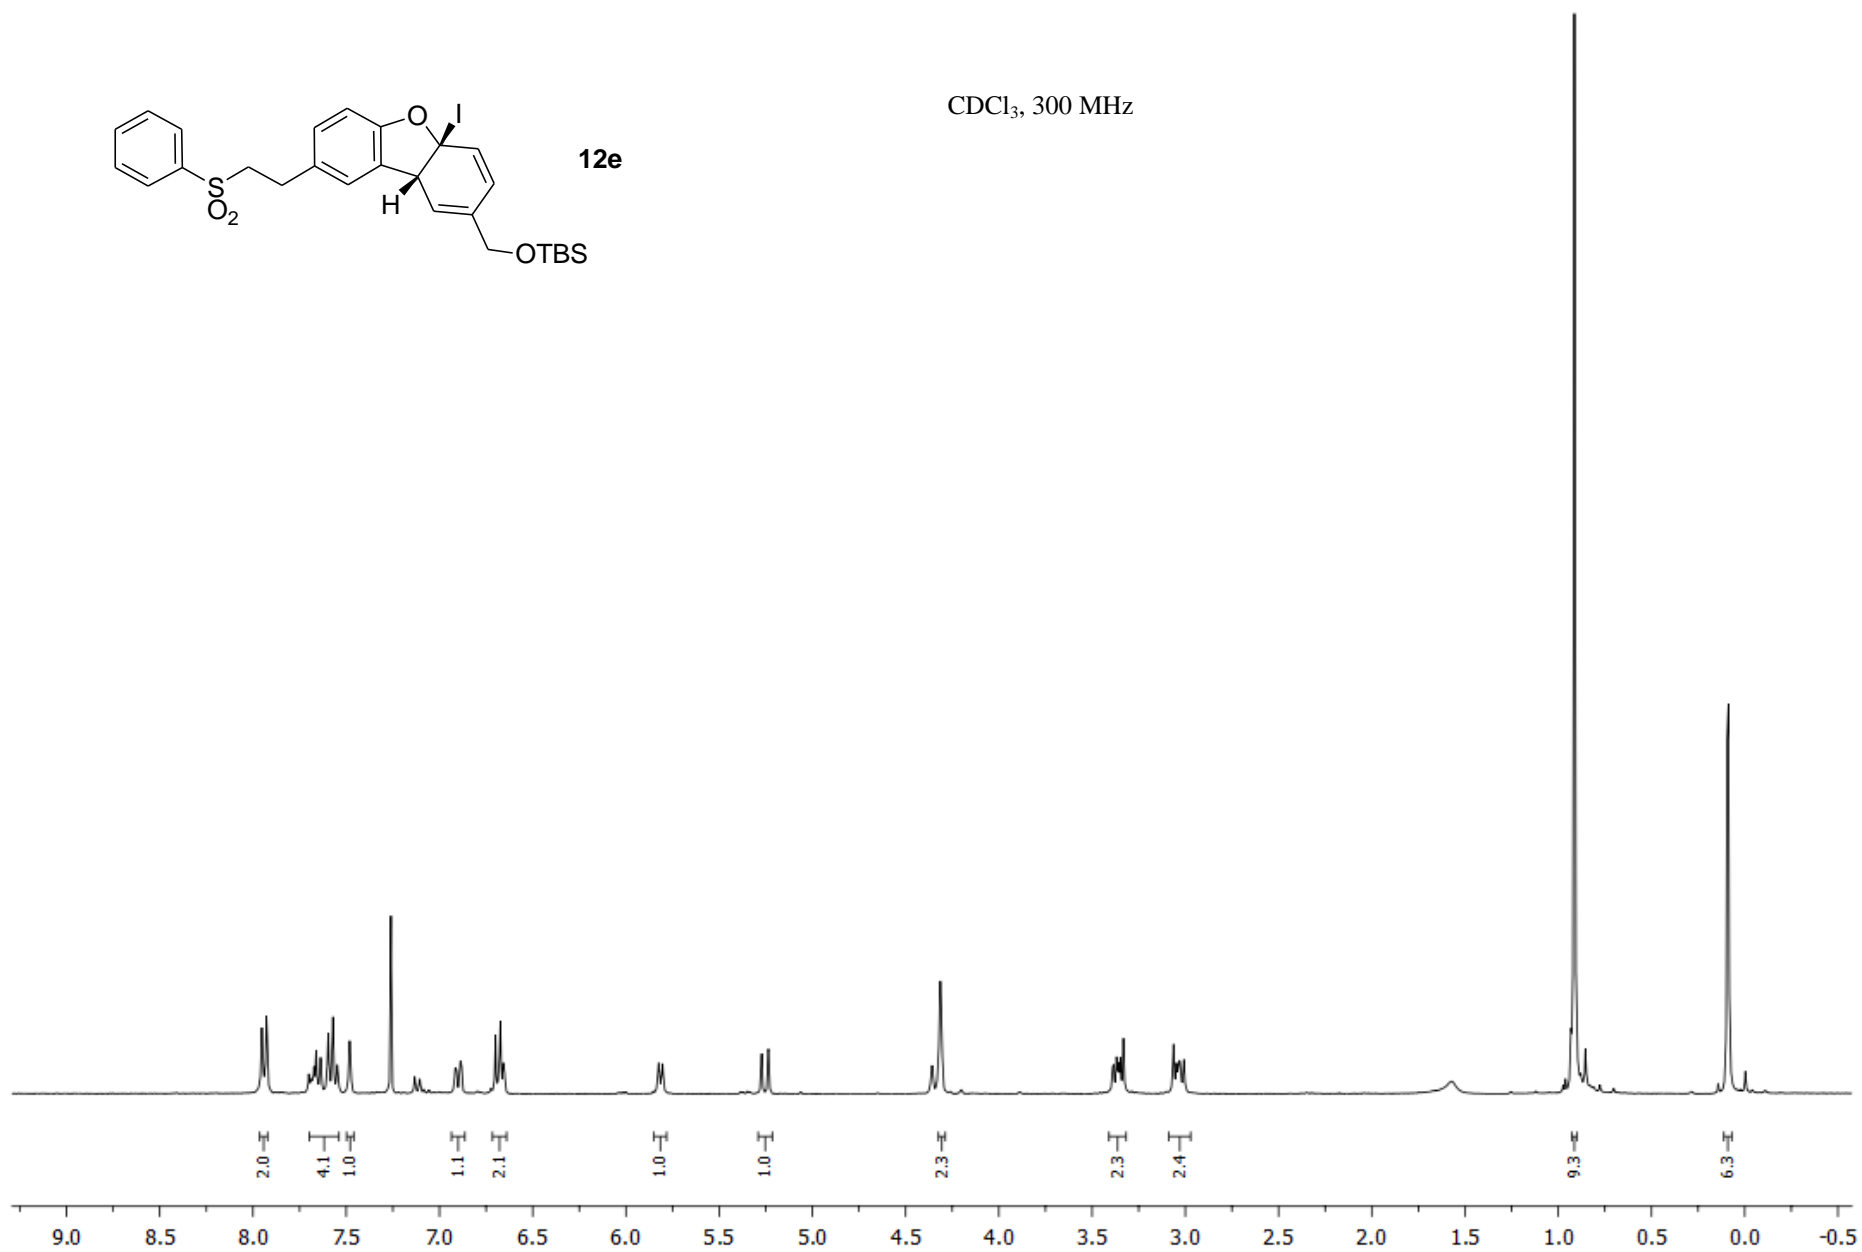

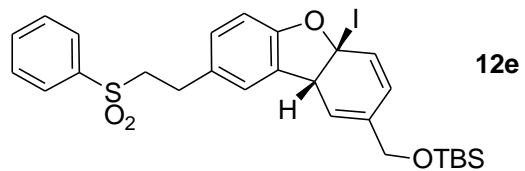

CDCl<sub>3</sub>, 75 MHz

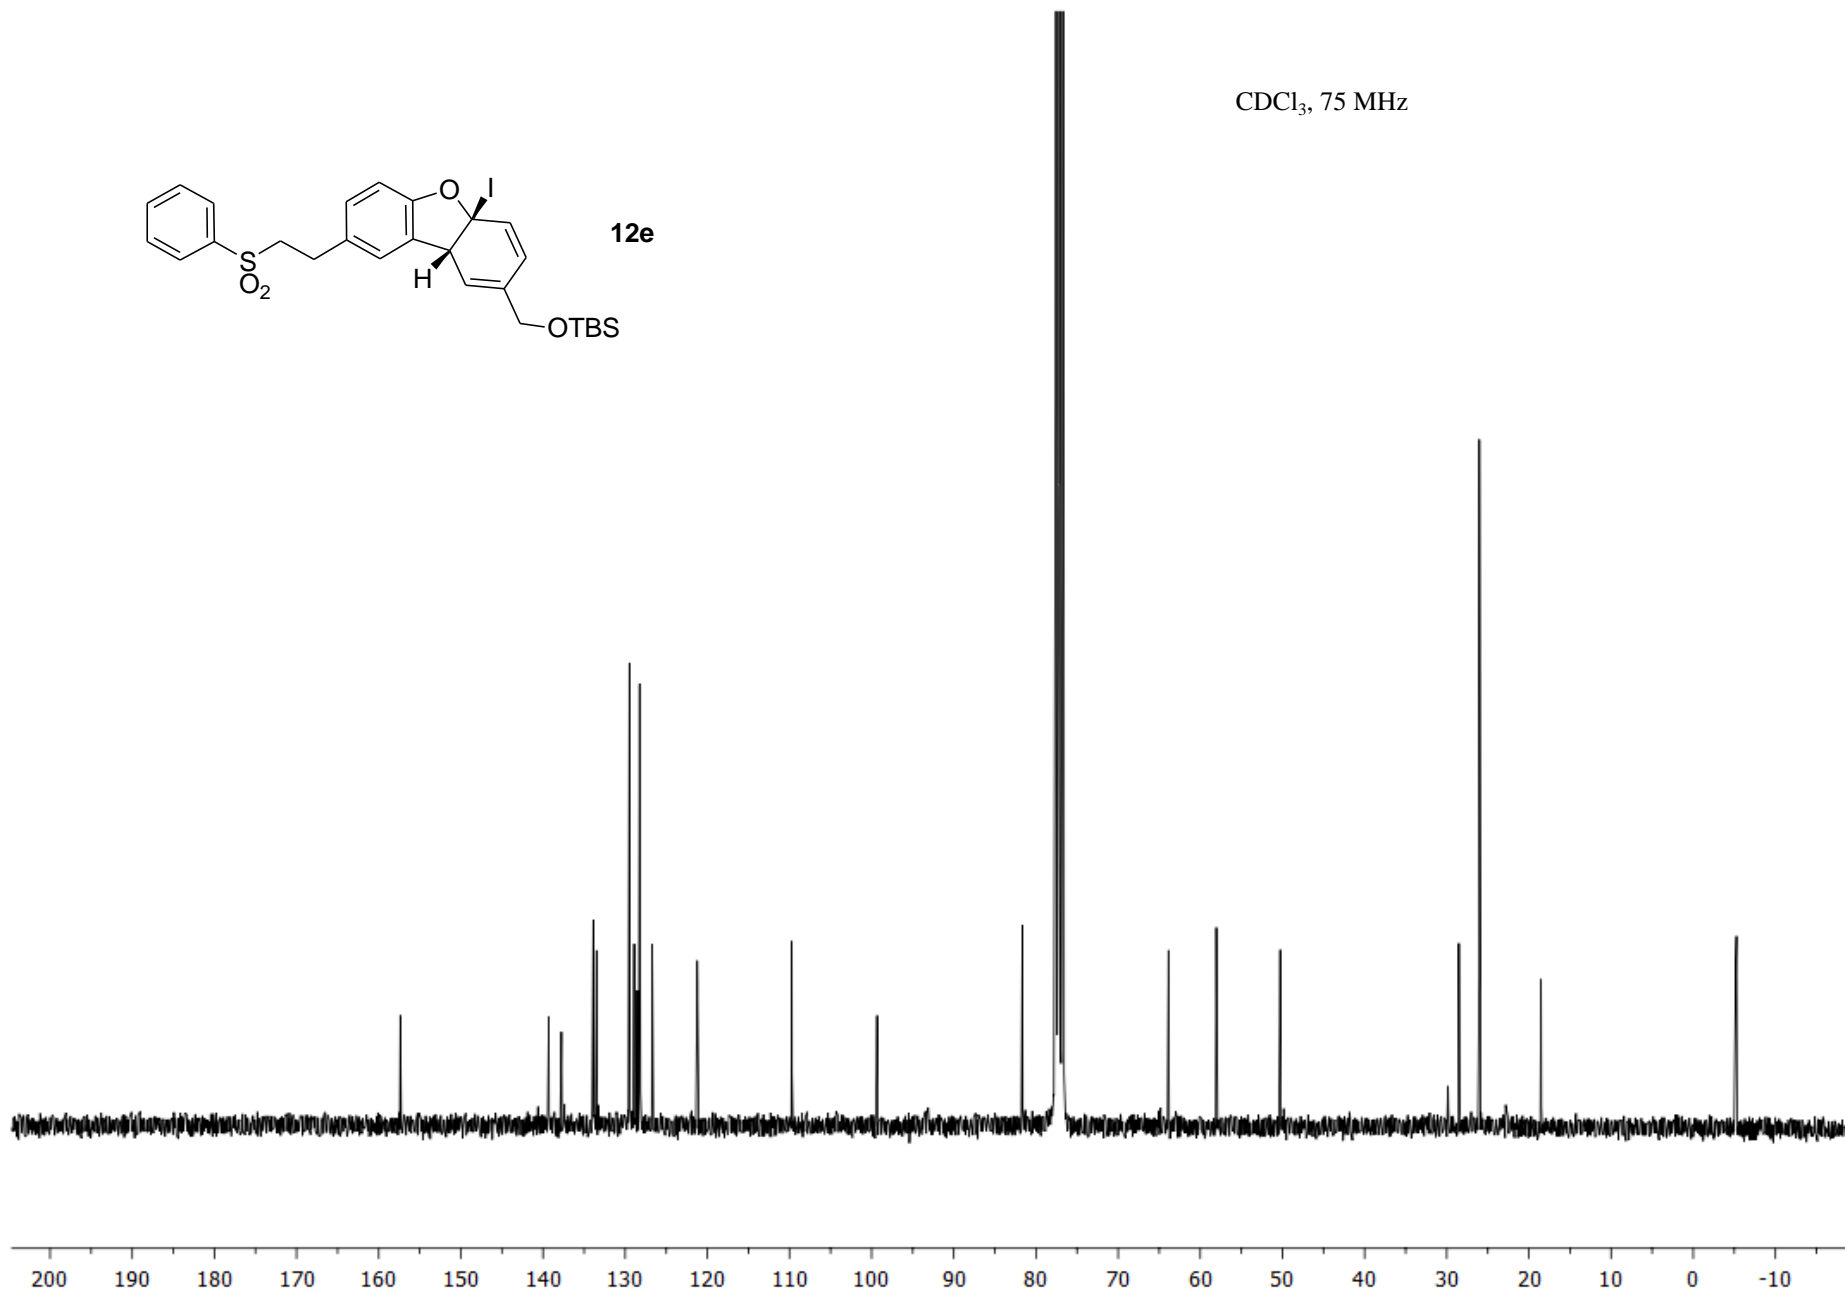

CDCl<sub>3</sub>, 300 MHz

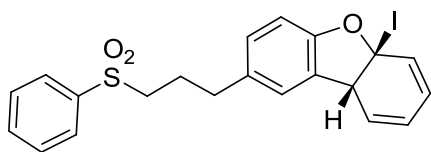

12f

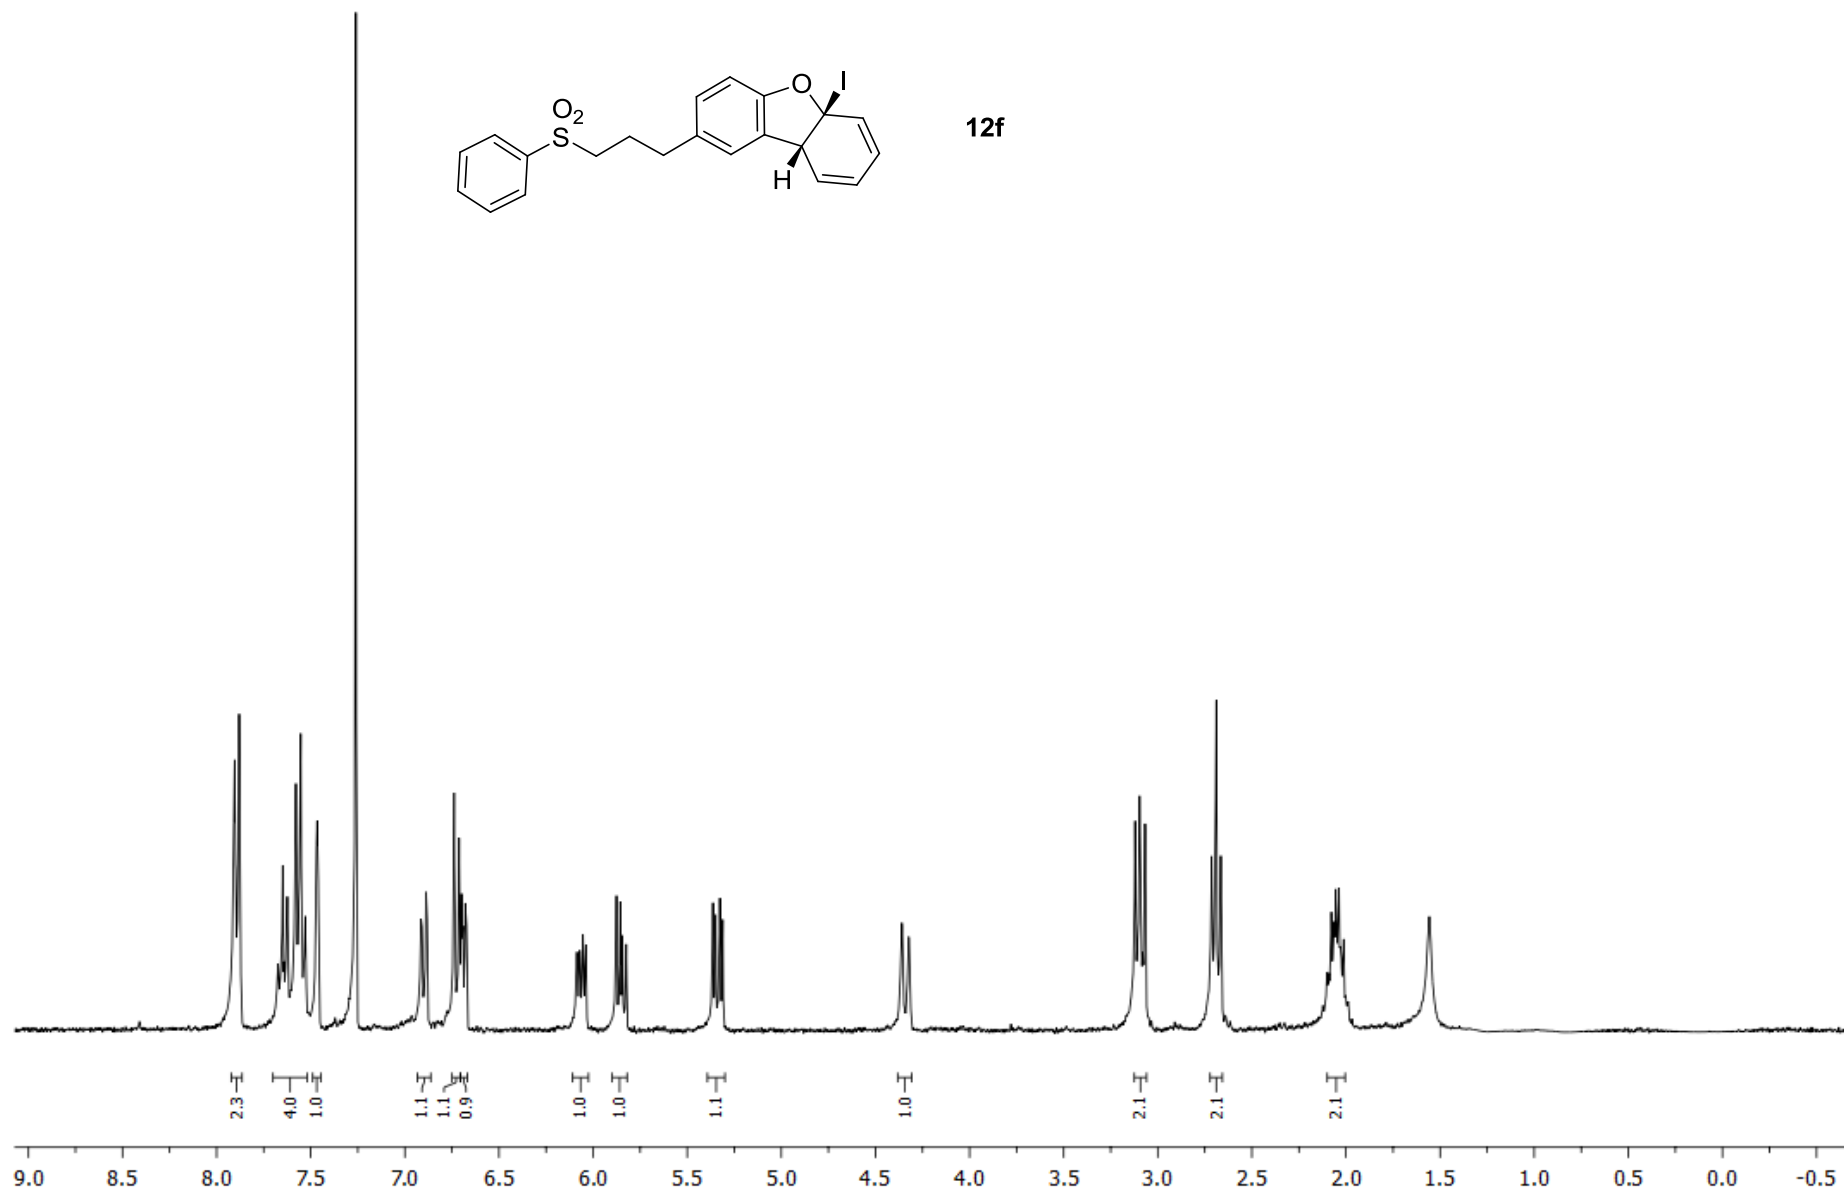

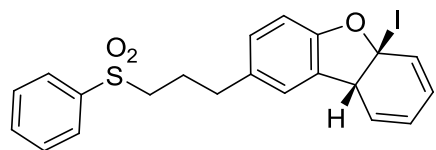

**12f**

CDCl<sub>3</sub>, 75 MHz

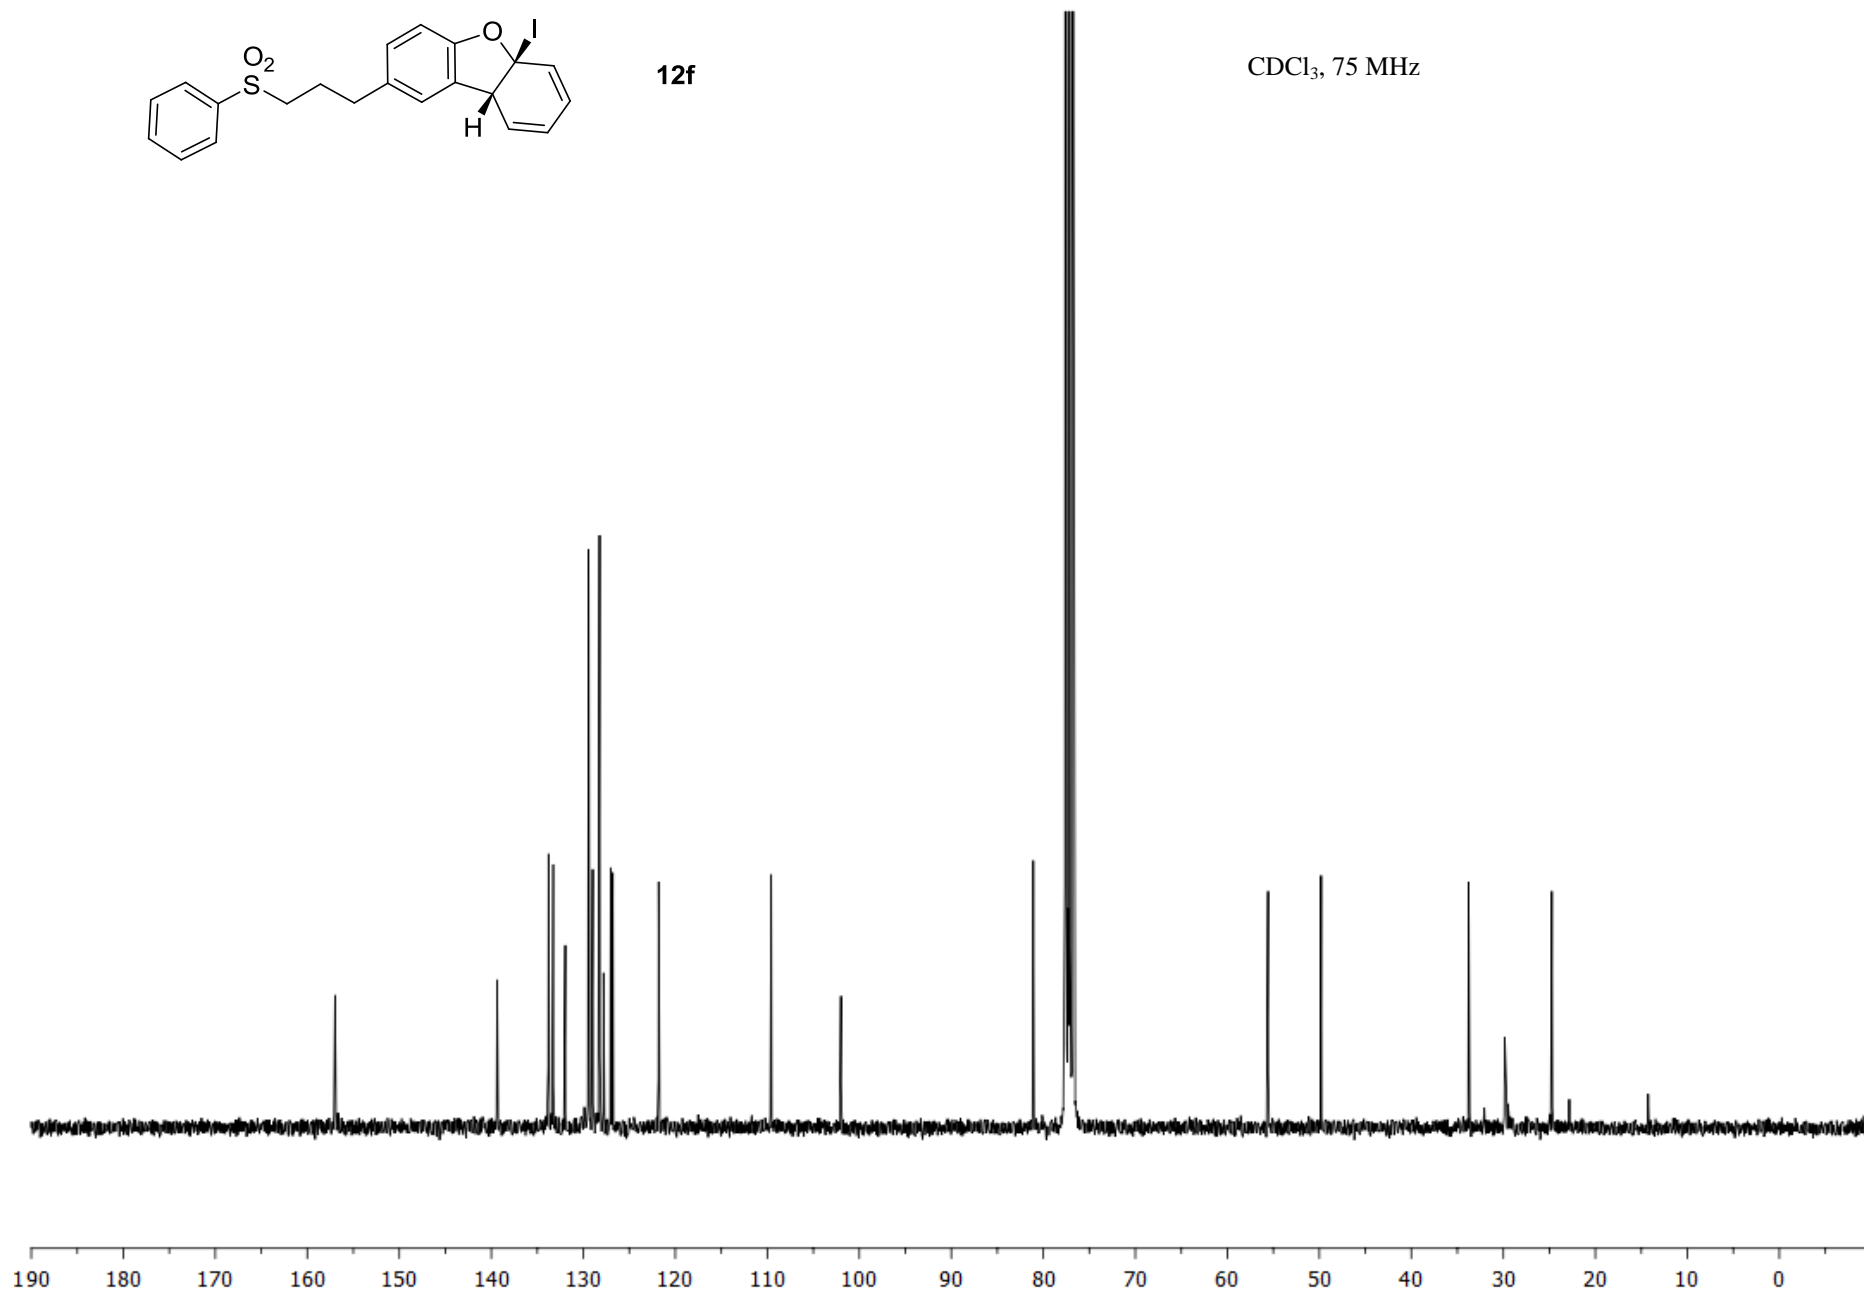

CDCl<sub>3</sub>, 300 MHz

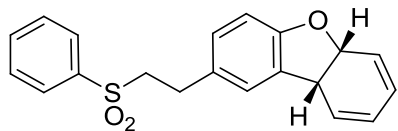

12g

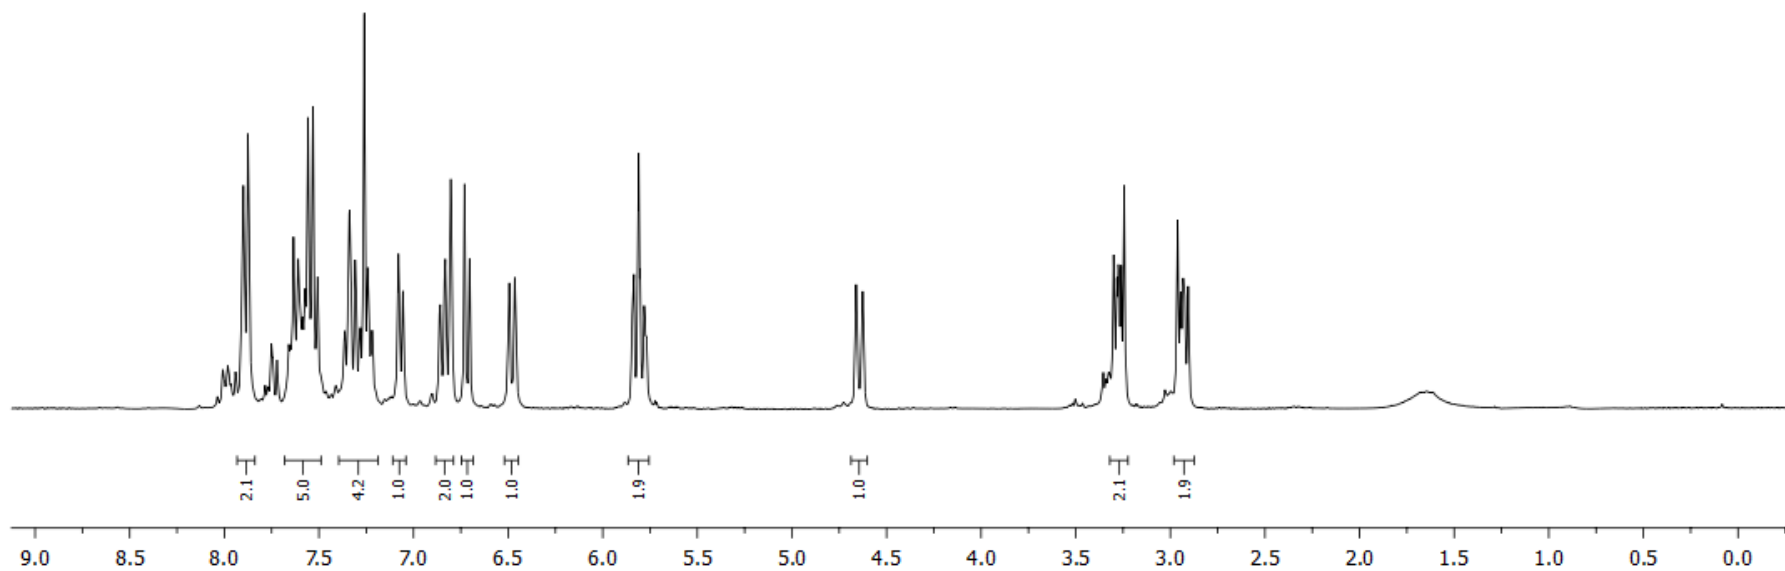



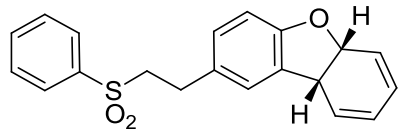

**12g**

CDCl<sub>3</sub>, 75 MHz

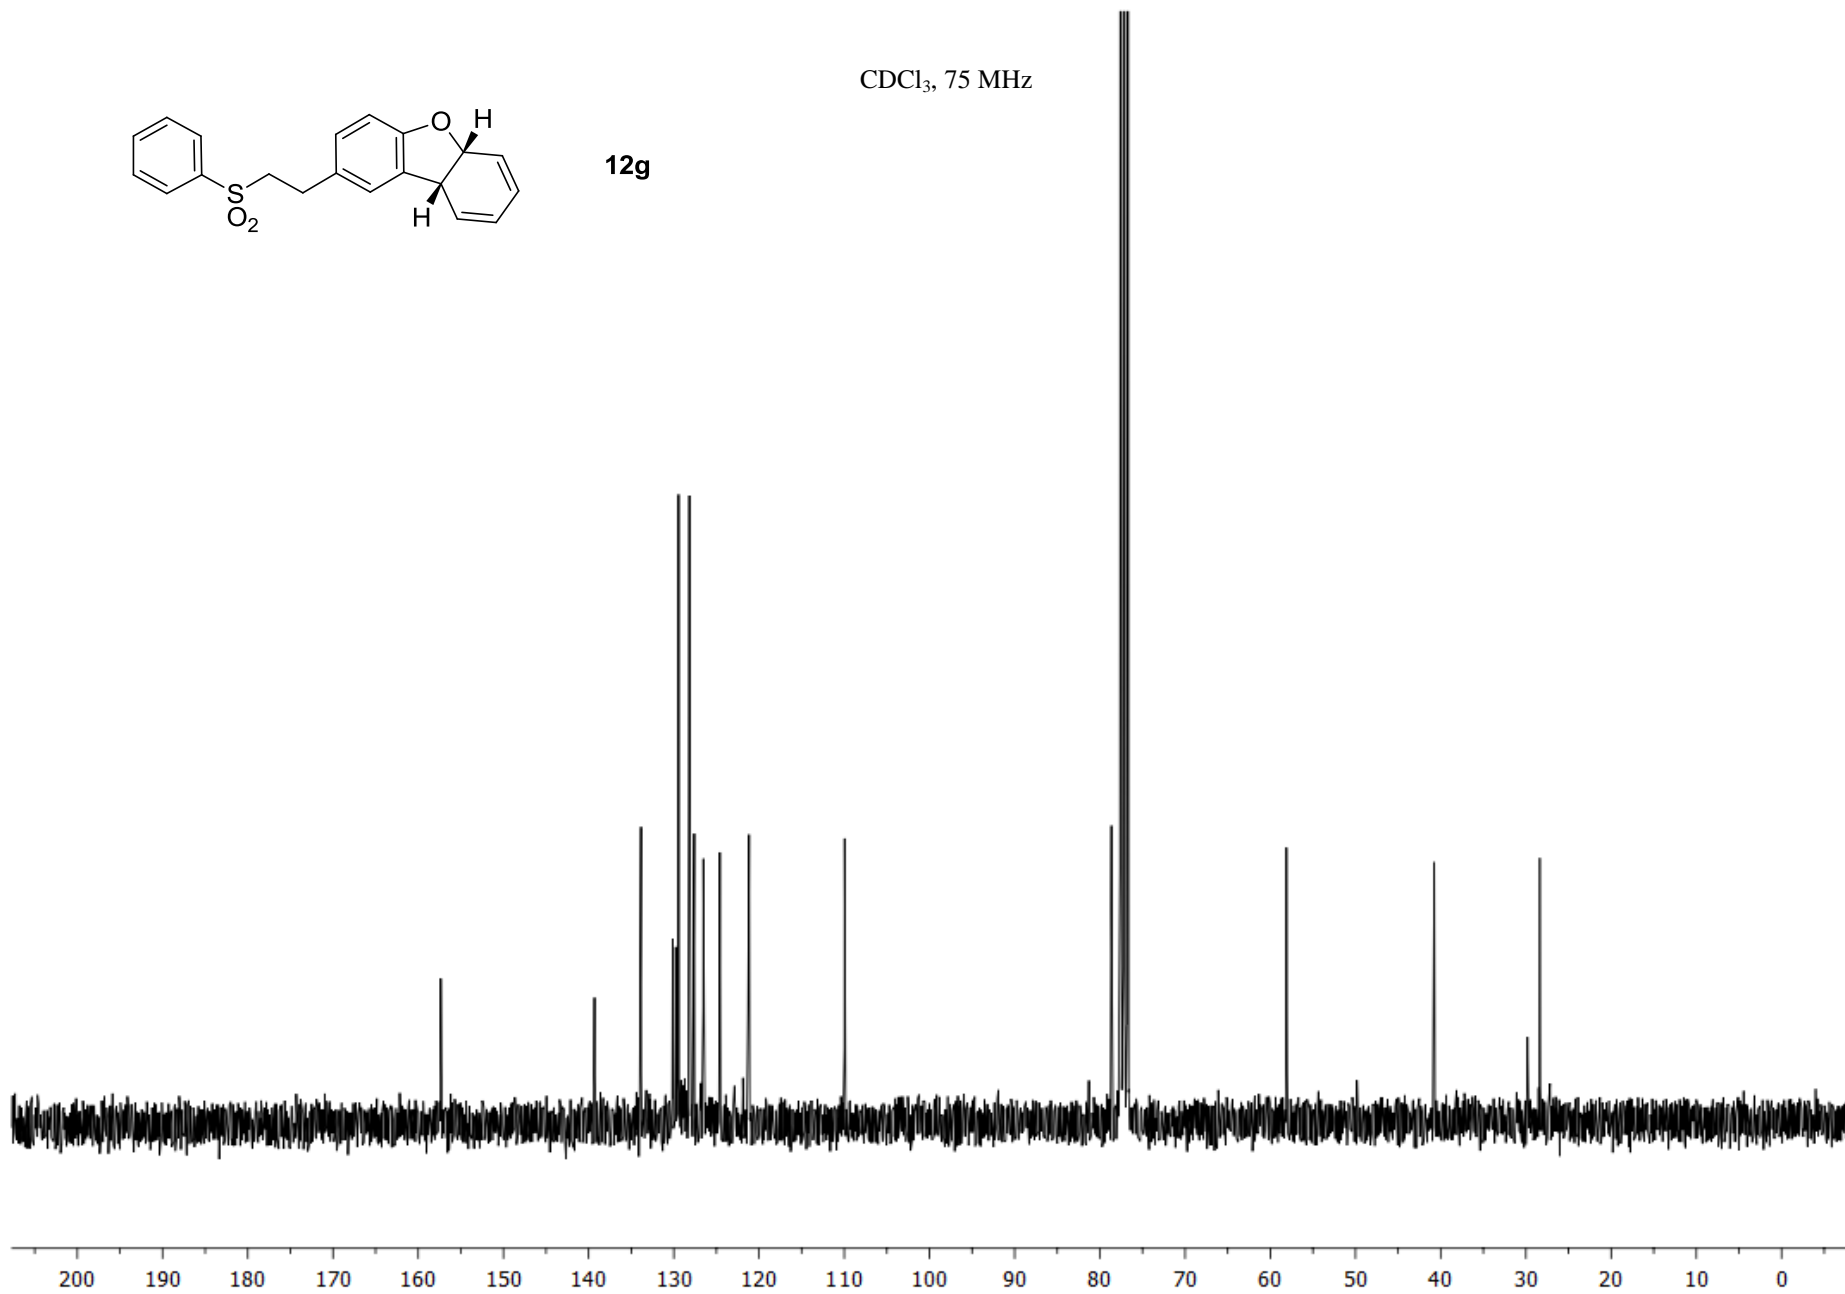

CDCl<sub>3</sub>, 300 MHz

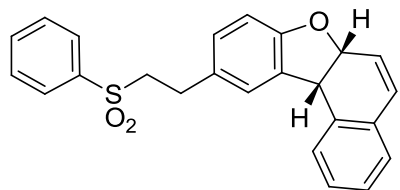

12h

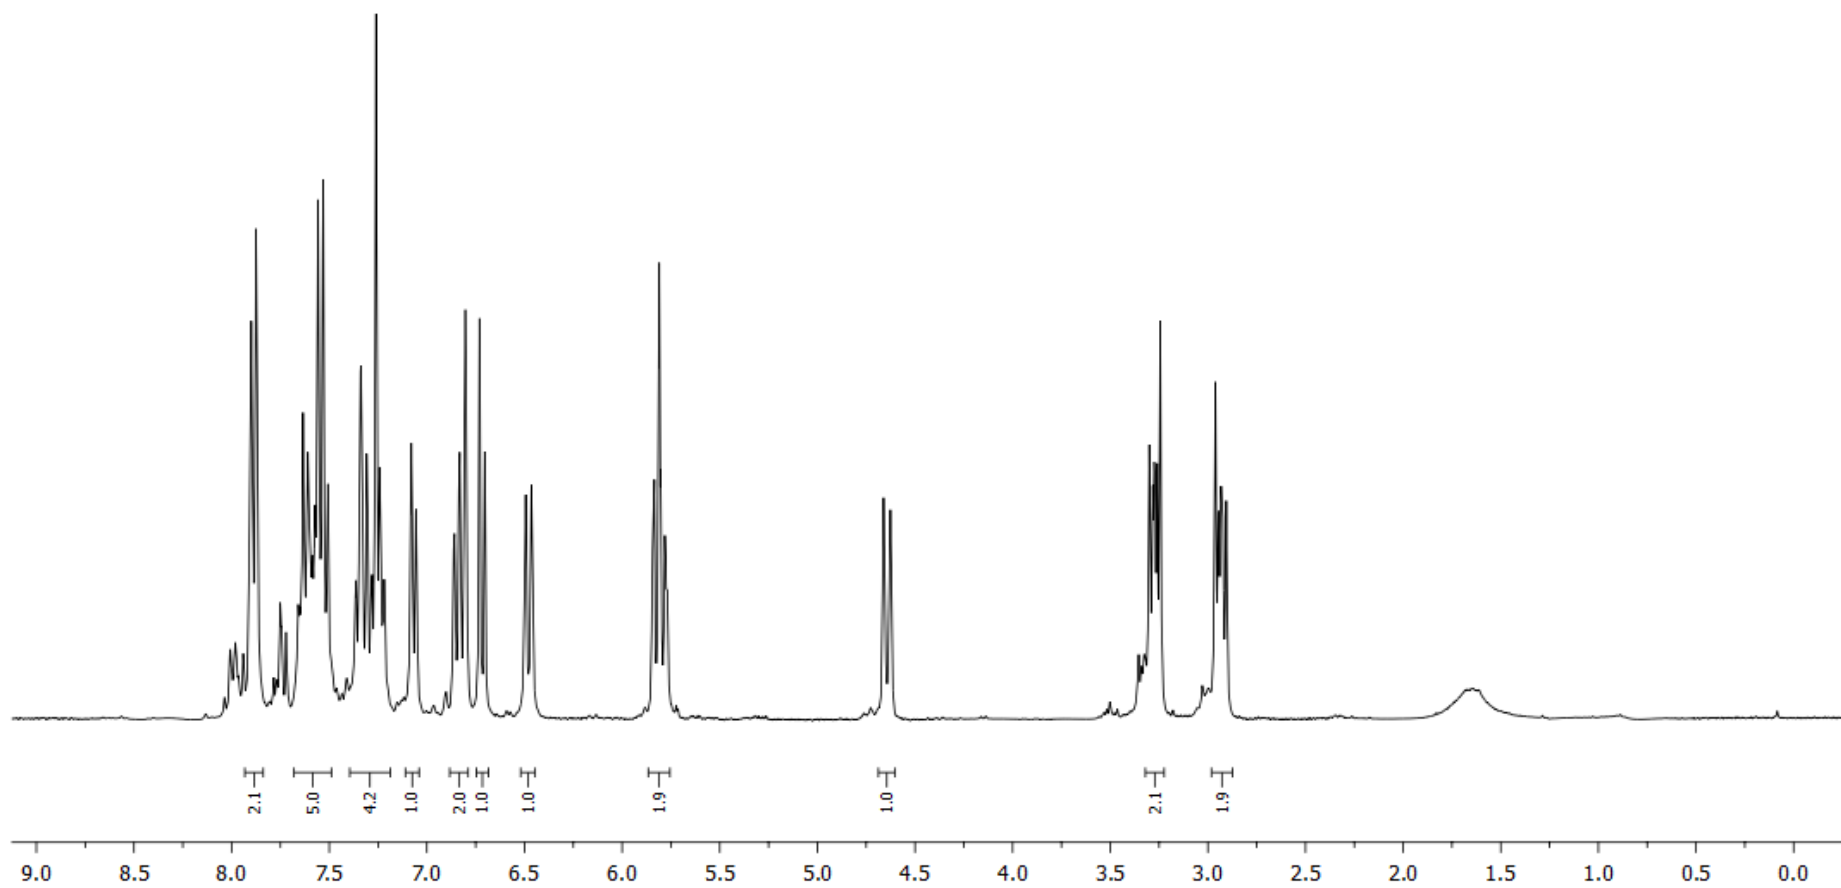

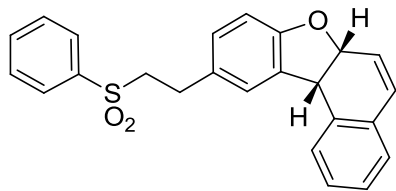

**12h**

CDCl<sub>3</sub>, 75 MHz

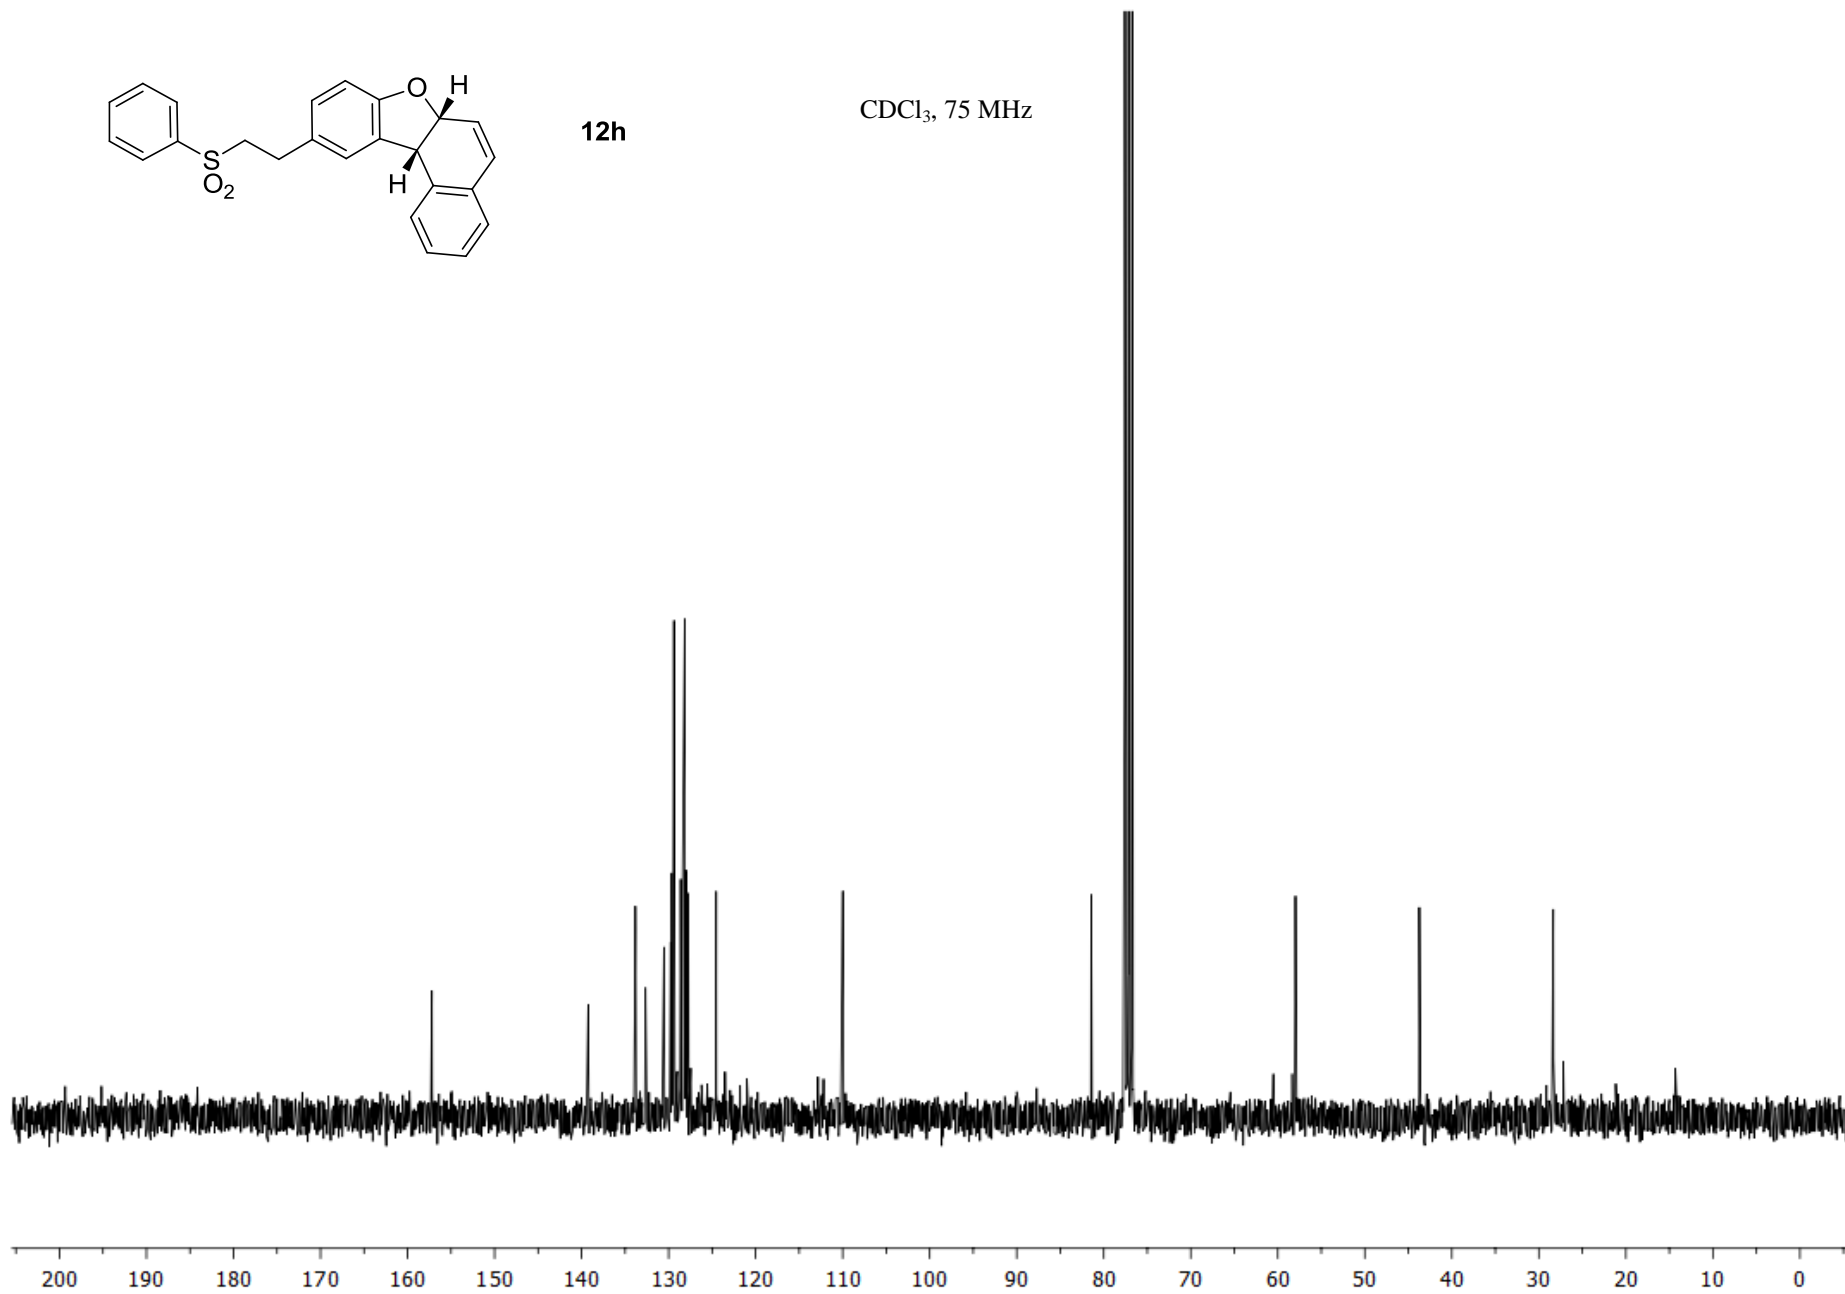

CDCl<sub>3</sub>, 300 MHz

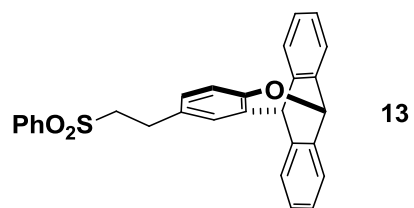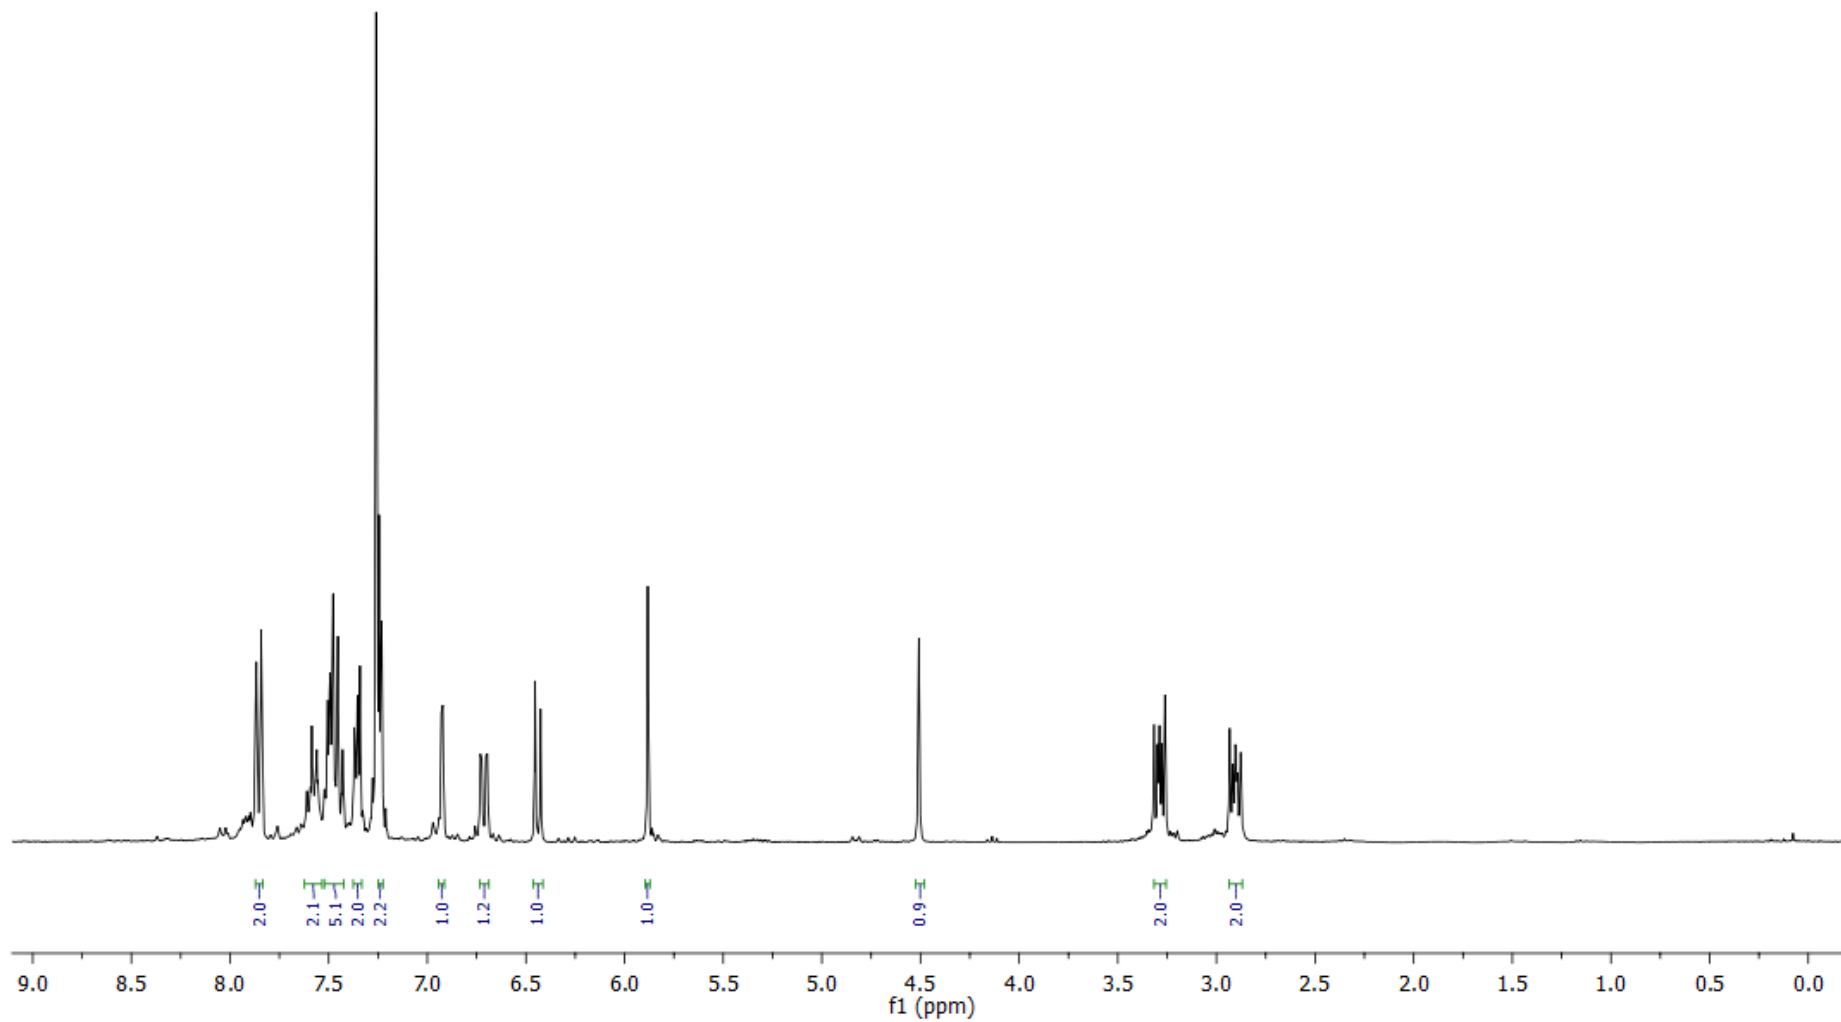

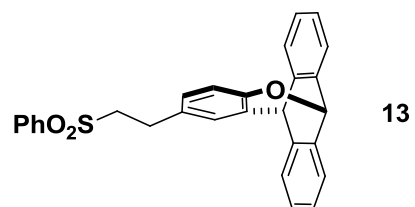

CDCl<sub>3</sub>, 75 MHz

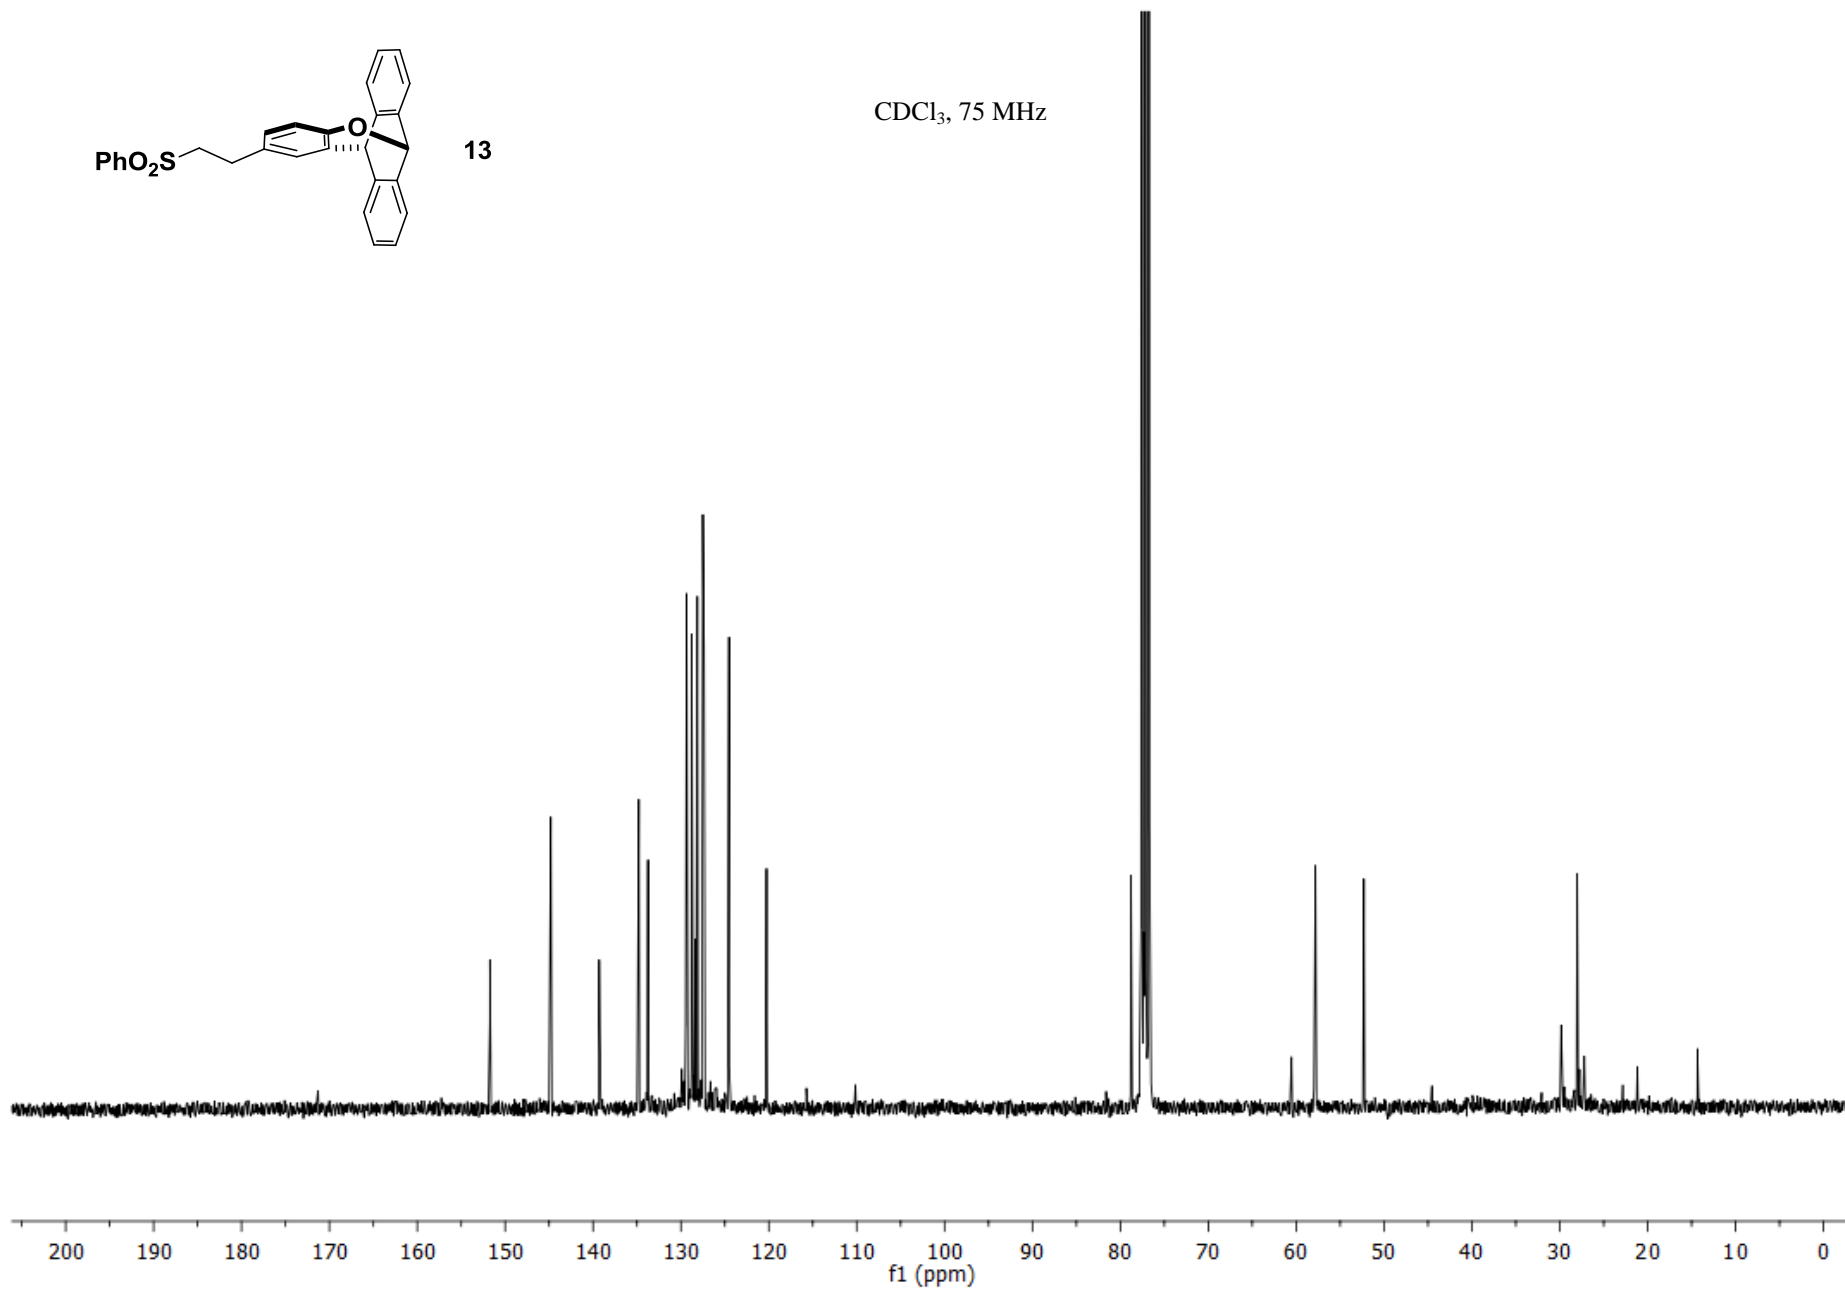

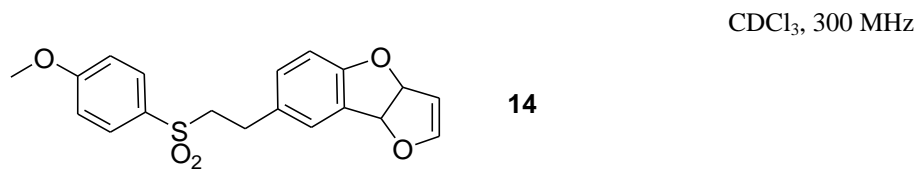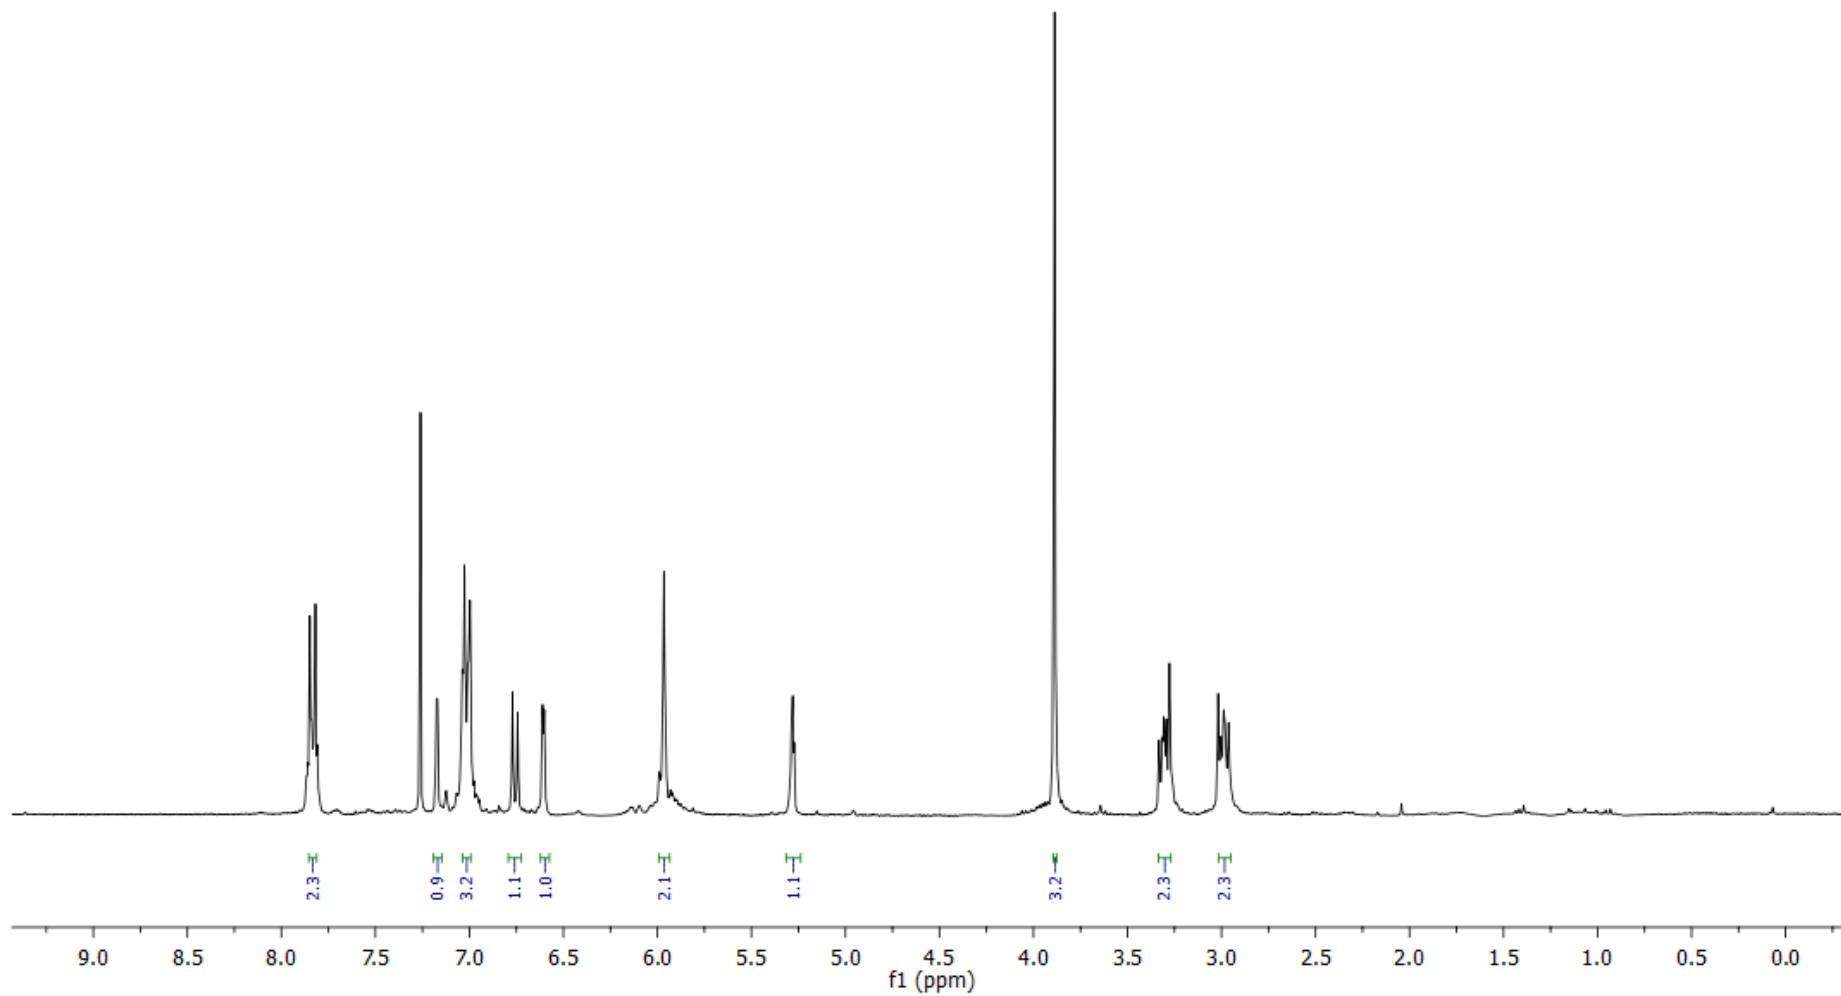

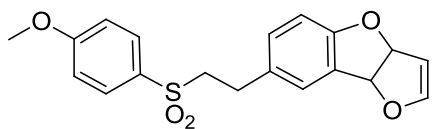

14

CDCl<sub>3</sub>, 75 MHz

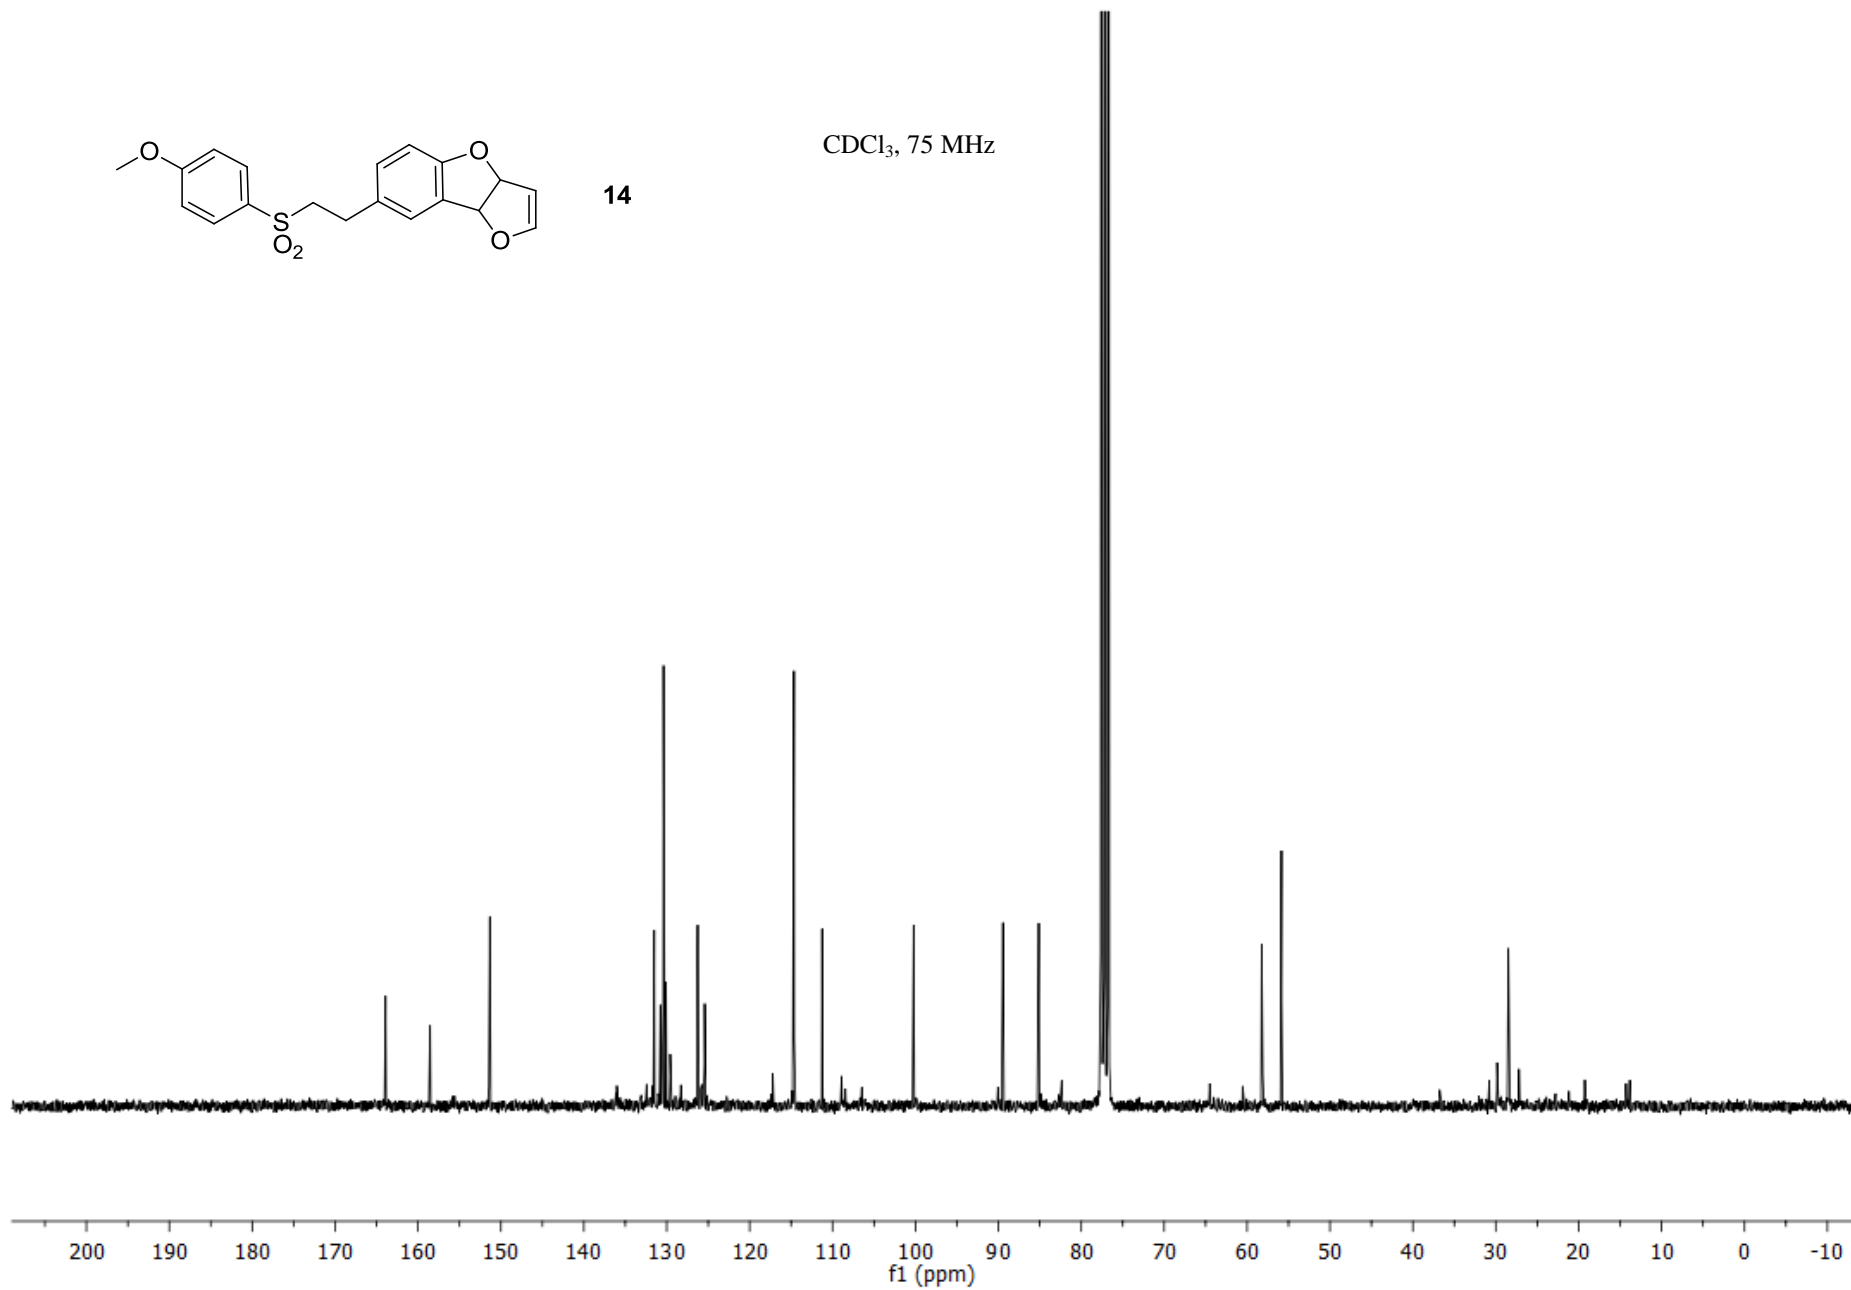

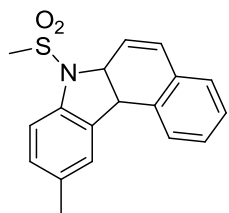

**17a**

CDCl<sub>3</sub>, 300 MHz

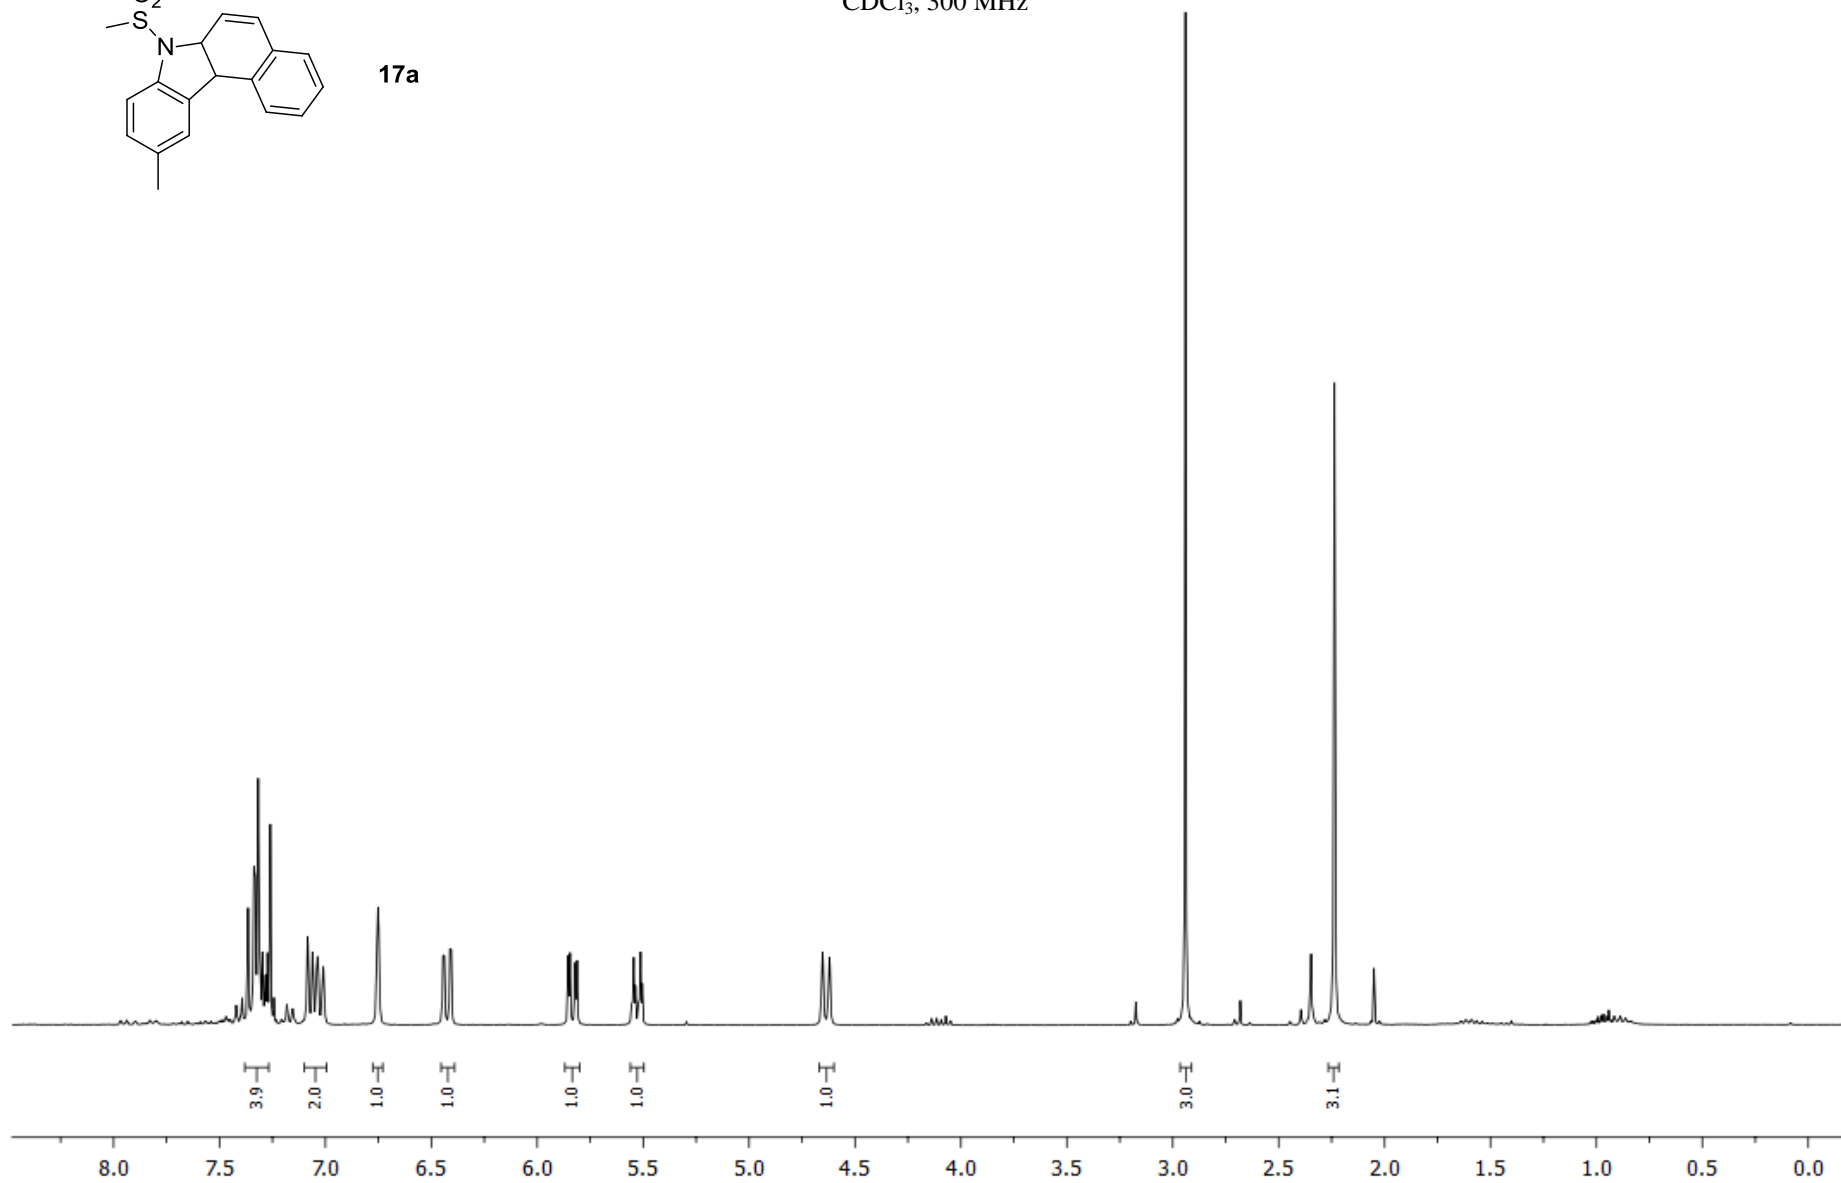



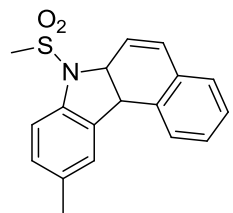

17a

CDCl<sub>3</sub>, 75 MHz

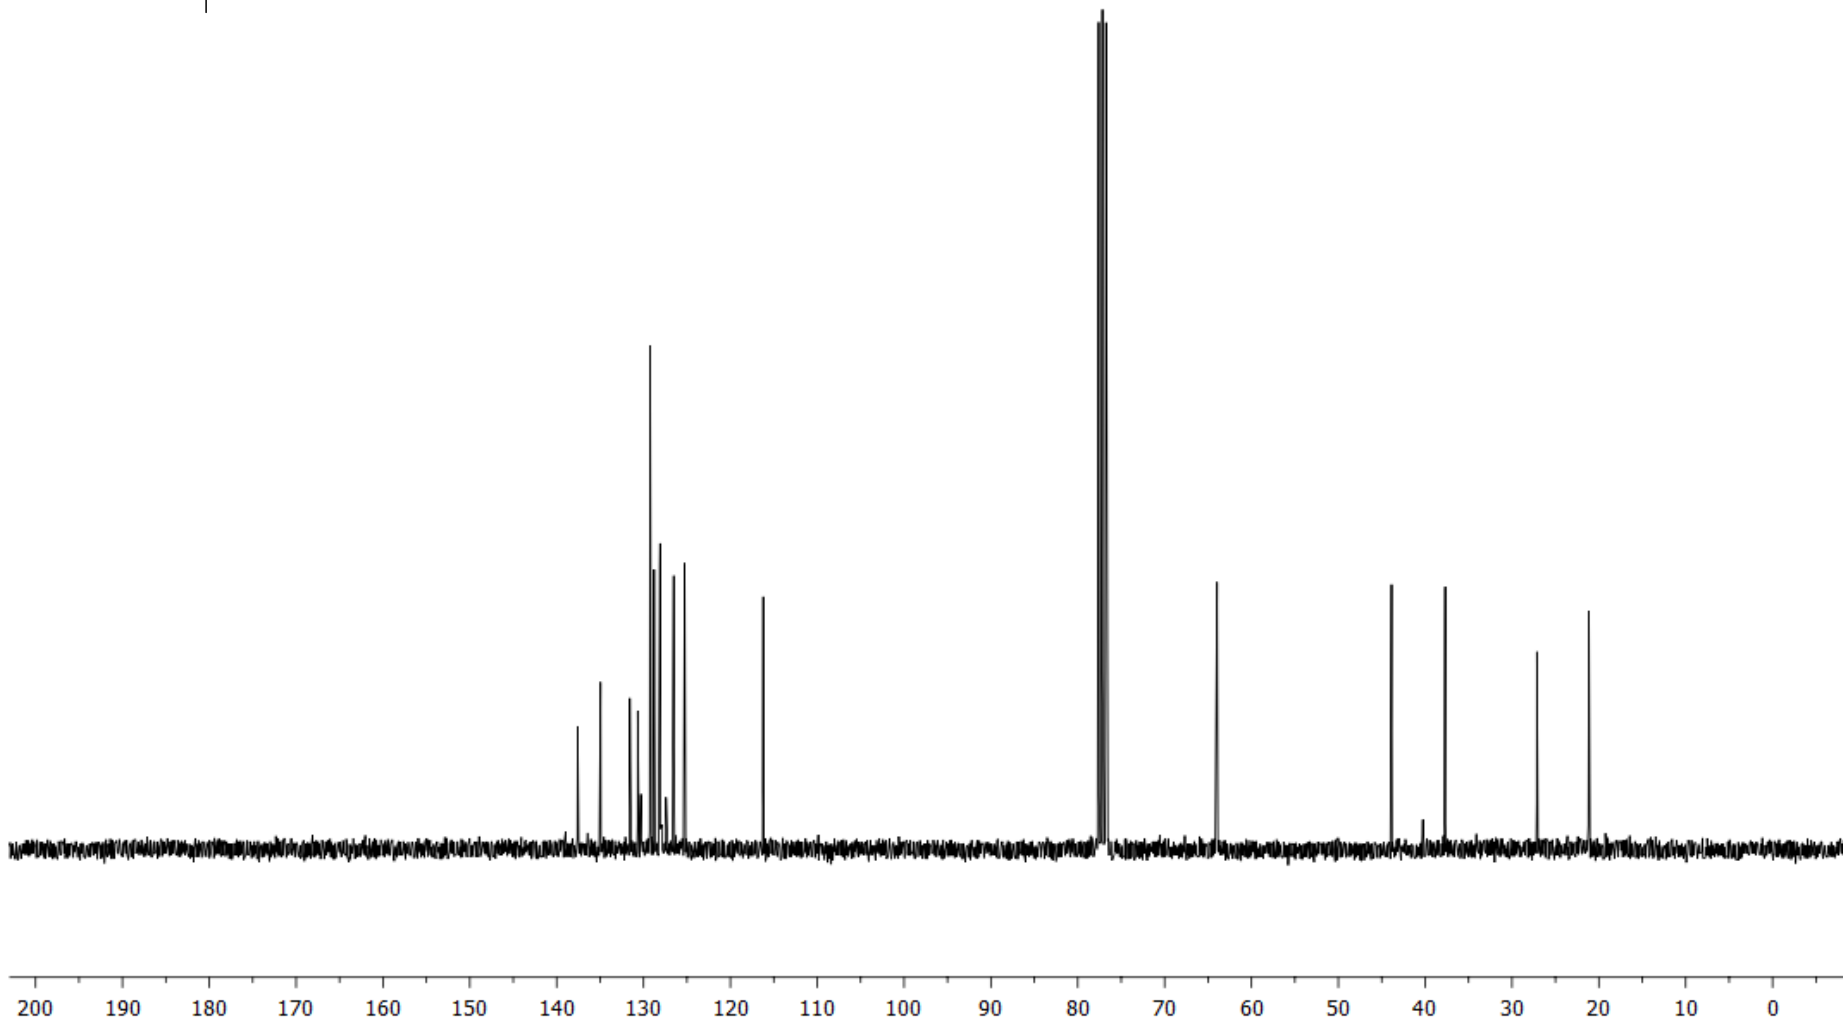

CDCl<sub>3</sub>, 300 MHz

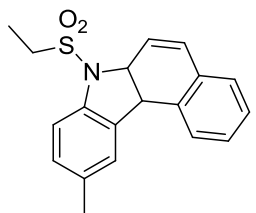

**17b**

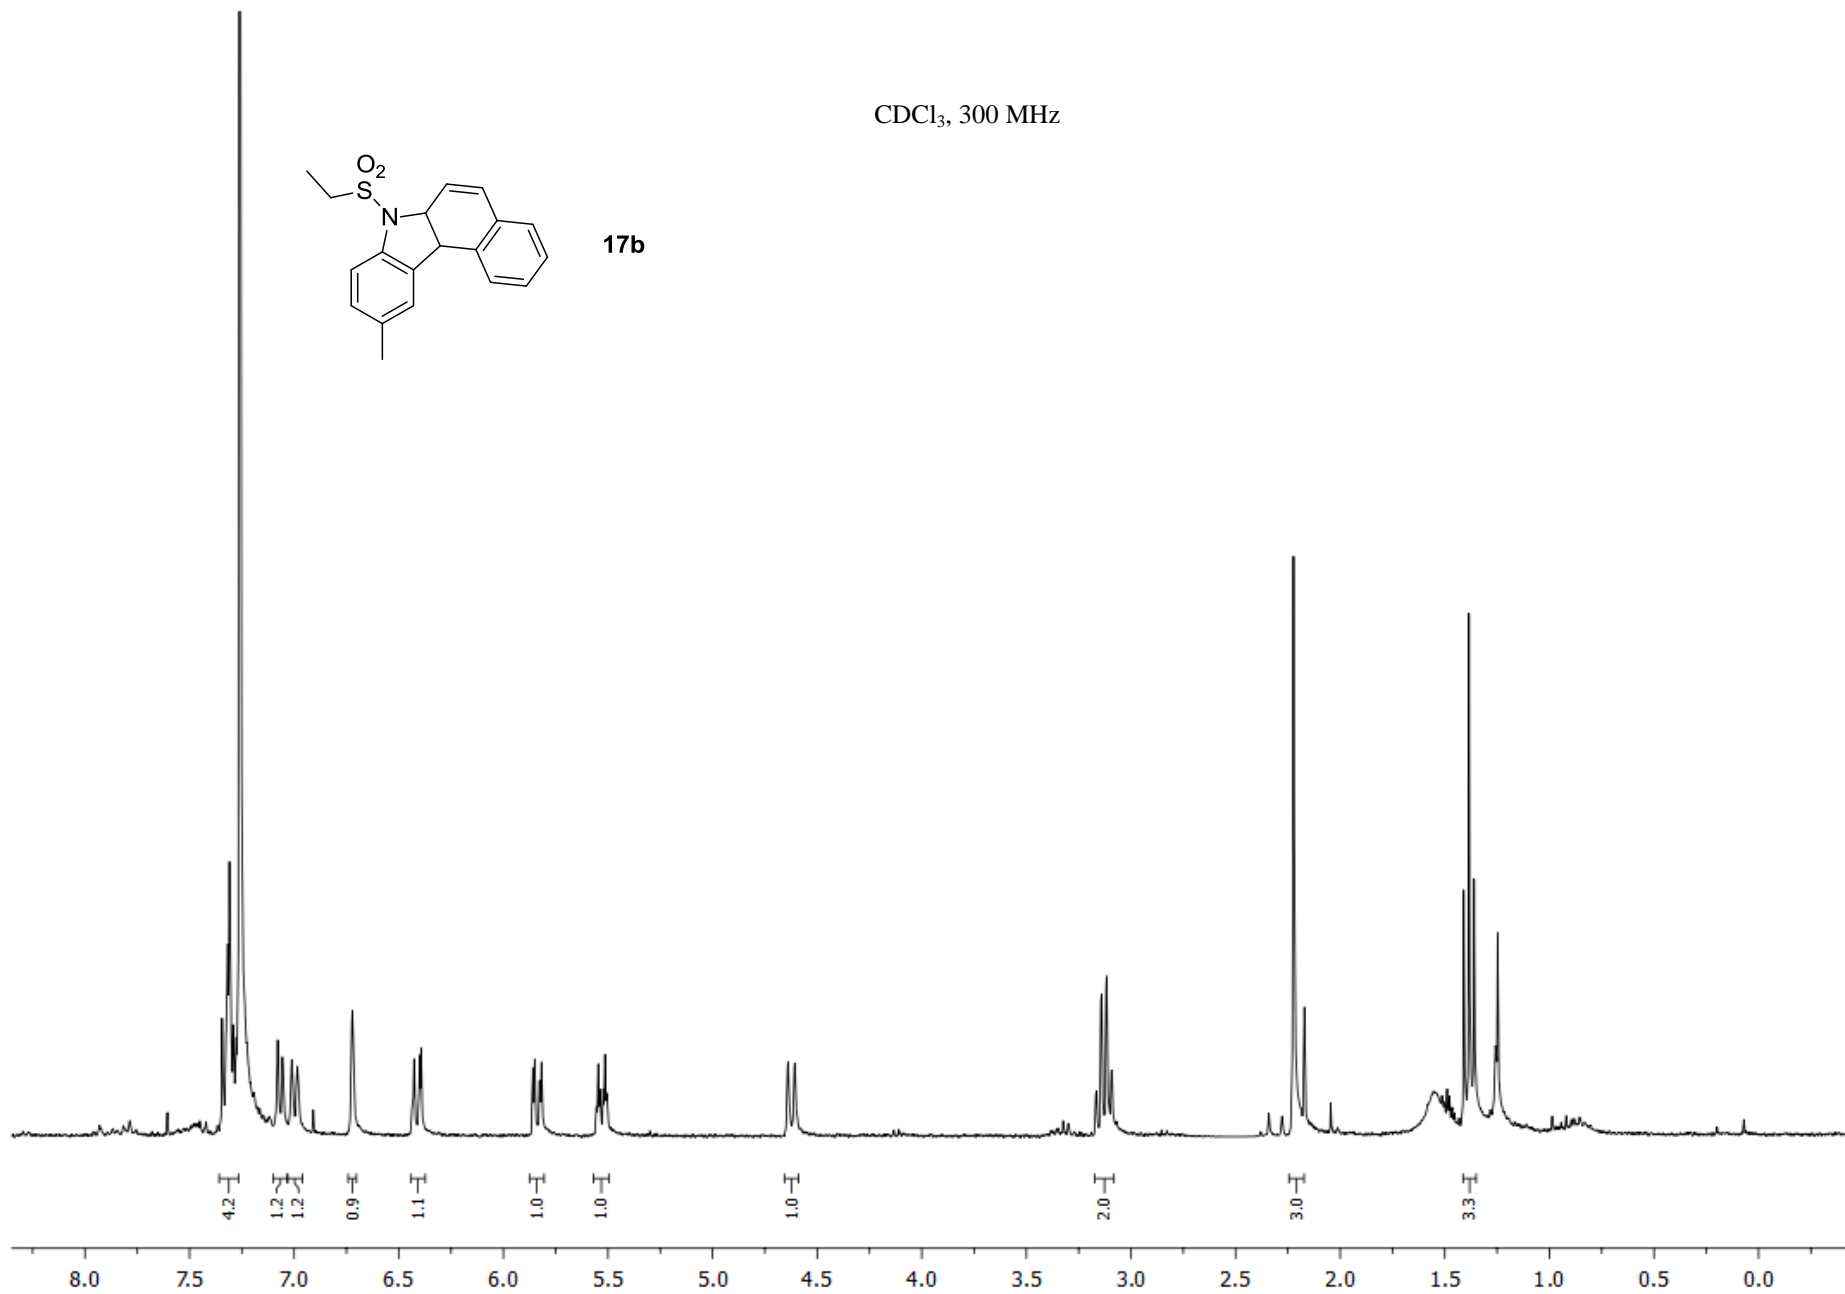

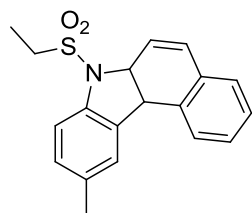

**17b**

CDCl<sub>3</sub>, 75 MHz

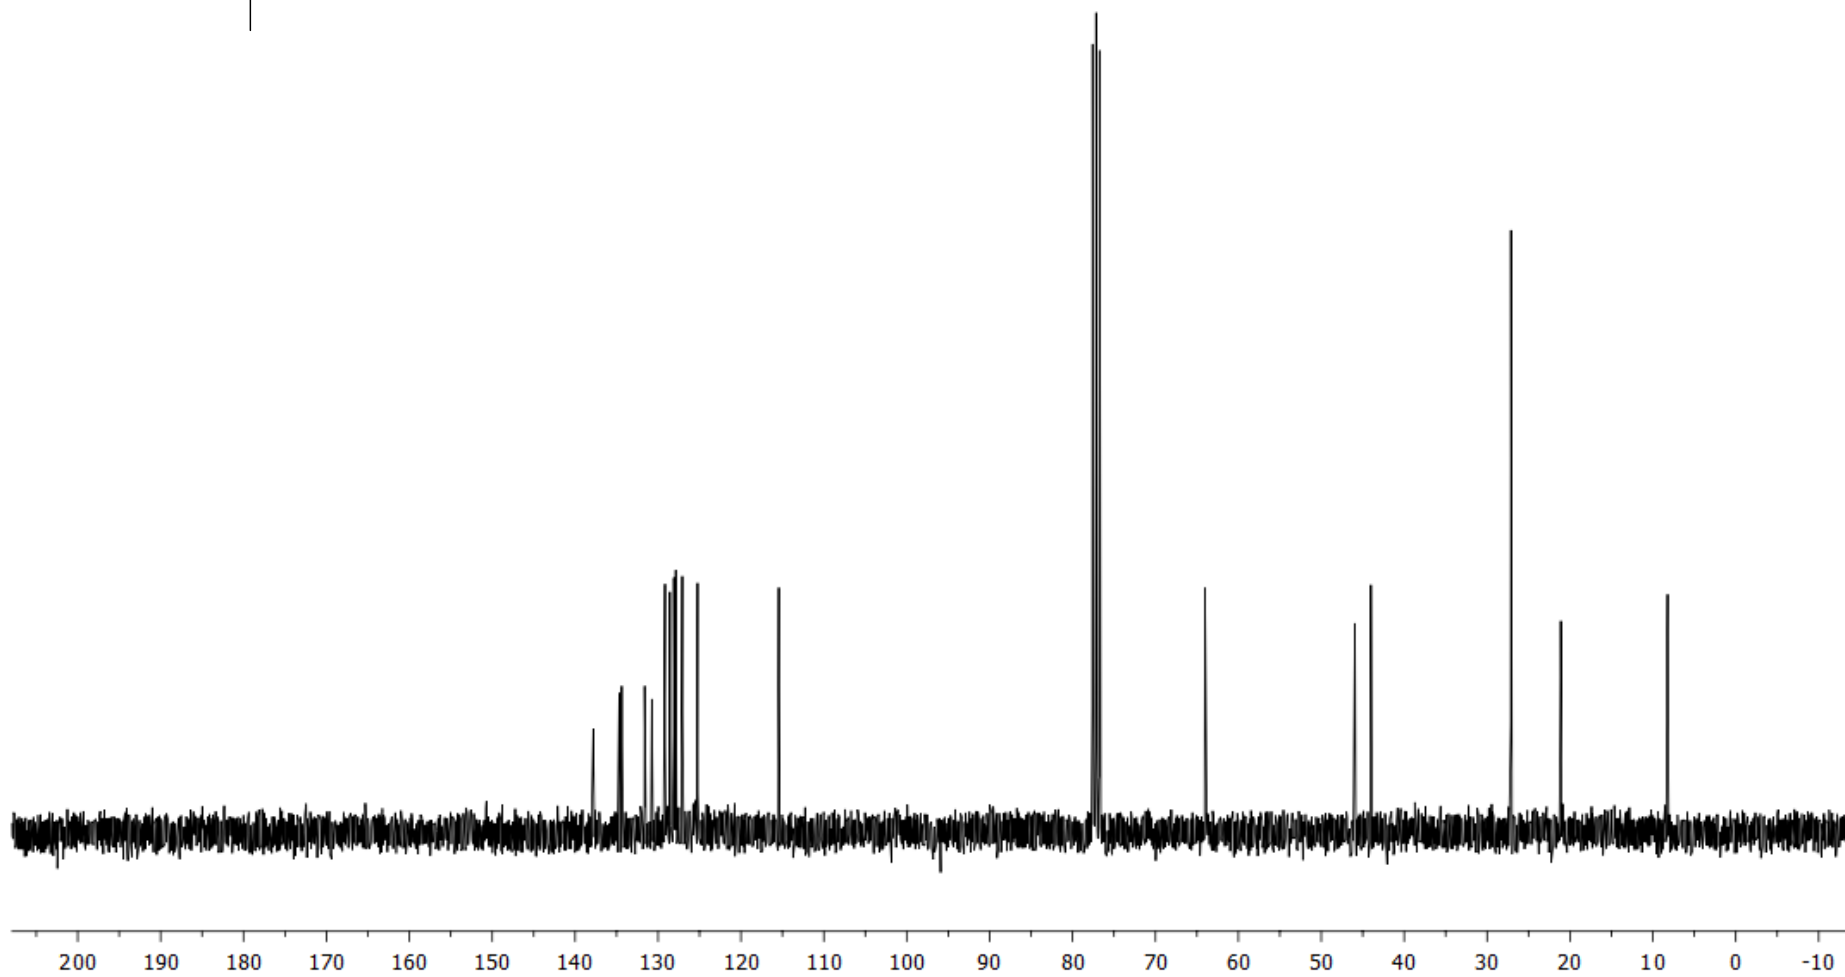

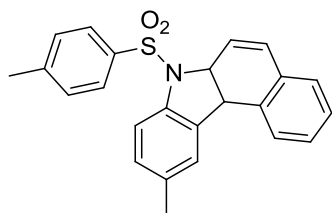

17c

CDCl<sub>3</sub>, 300 MHz

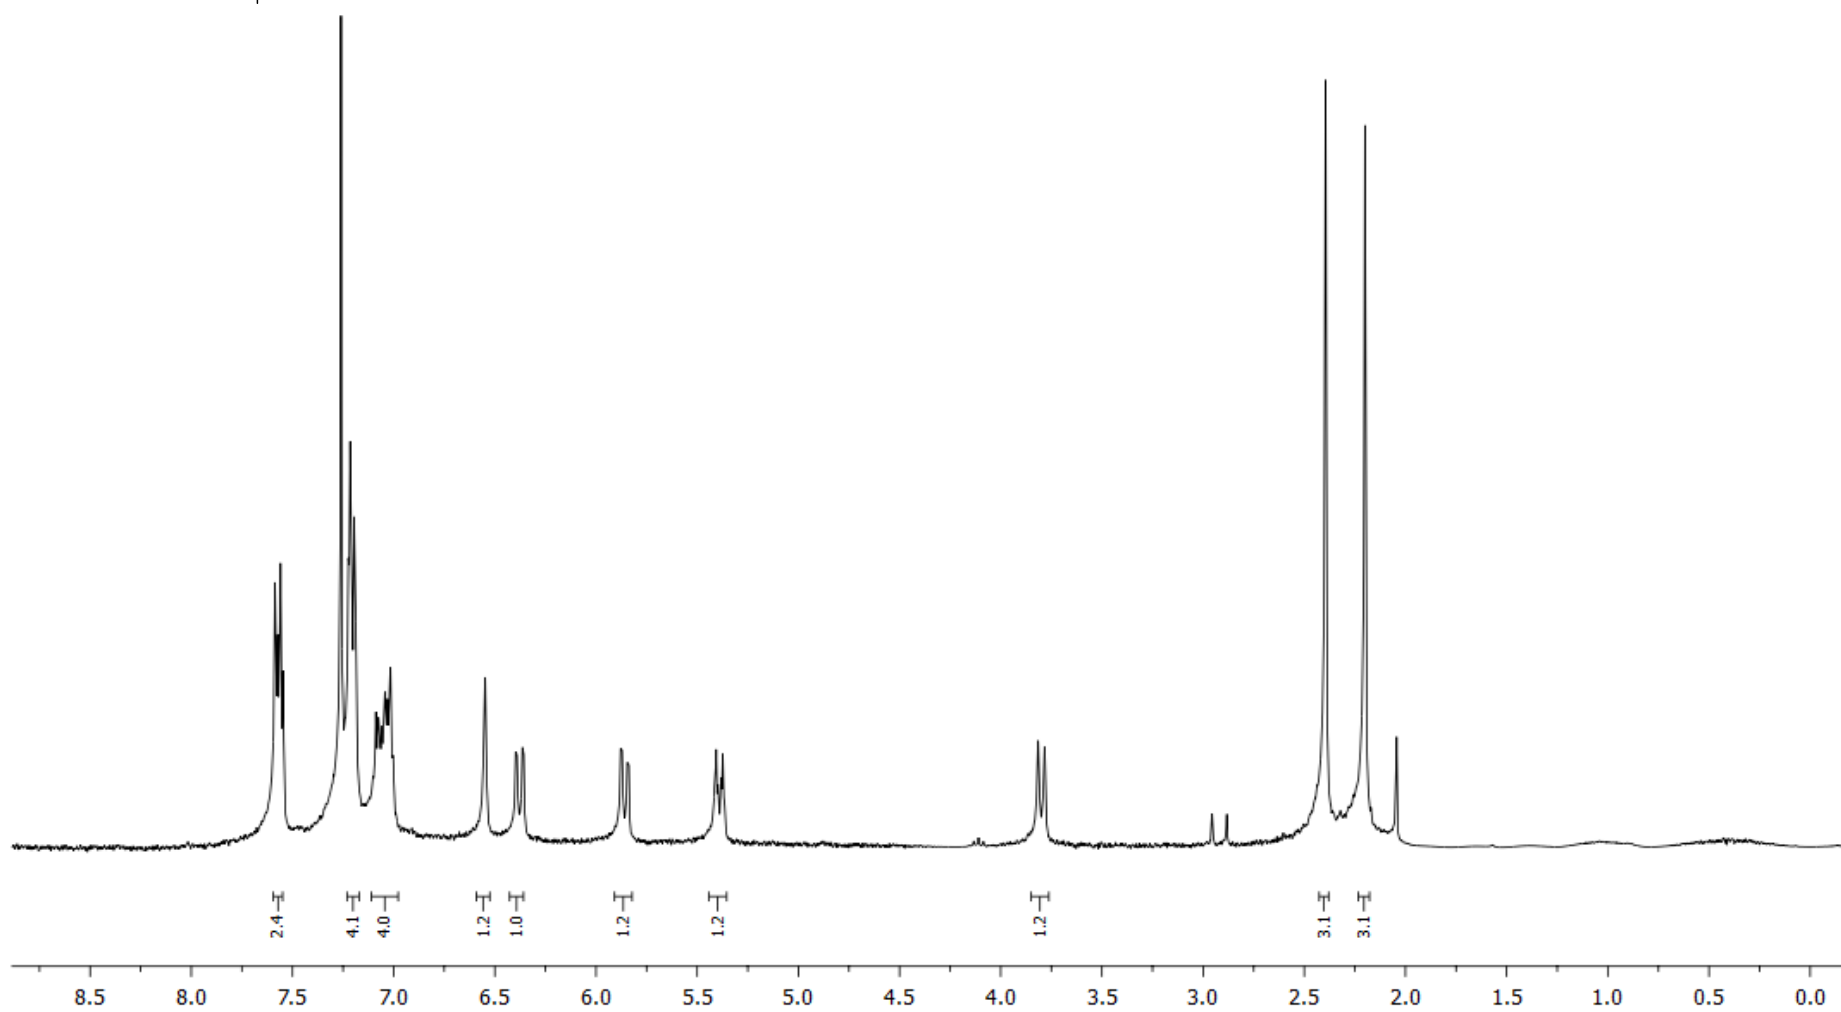

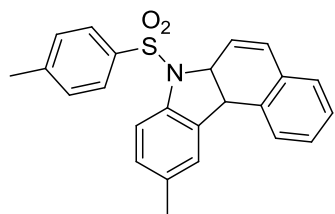

**17c**

CDCl<sub>3</sub>, 75 MHz

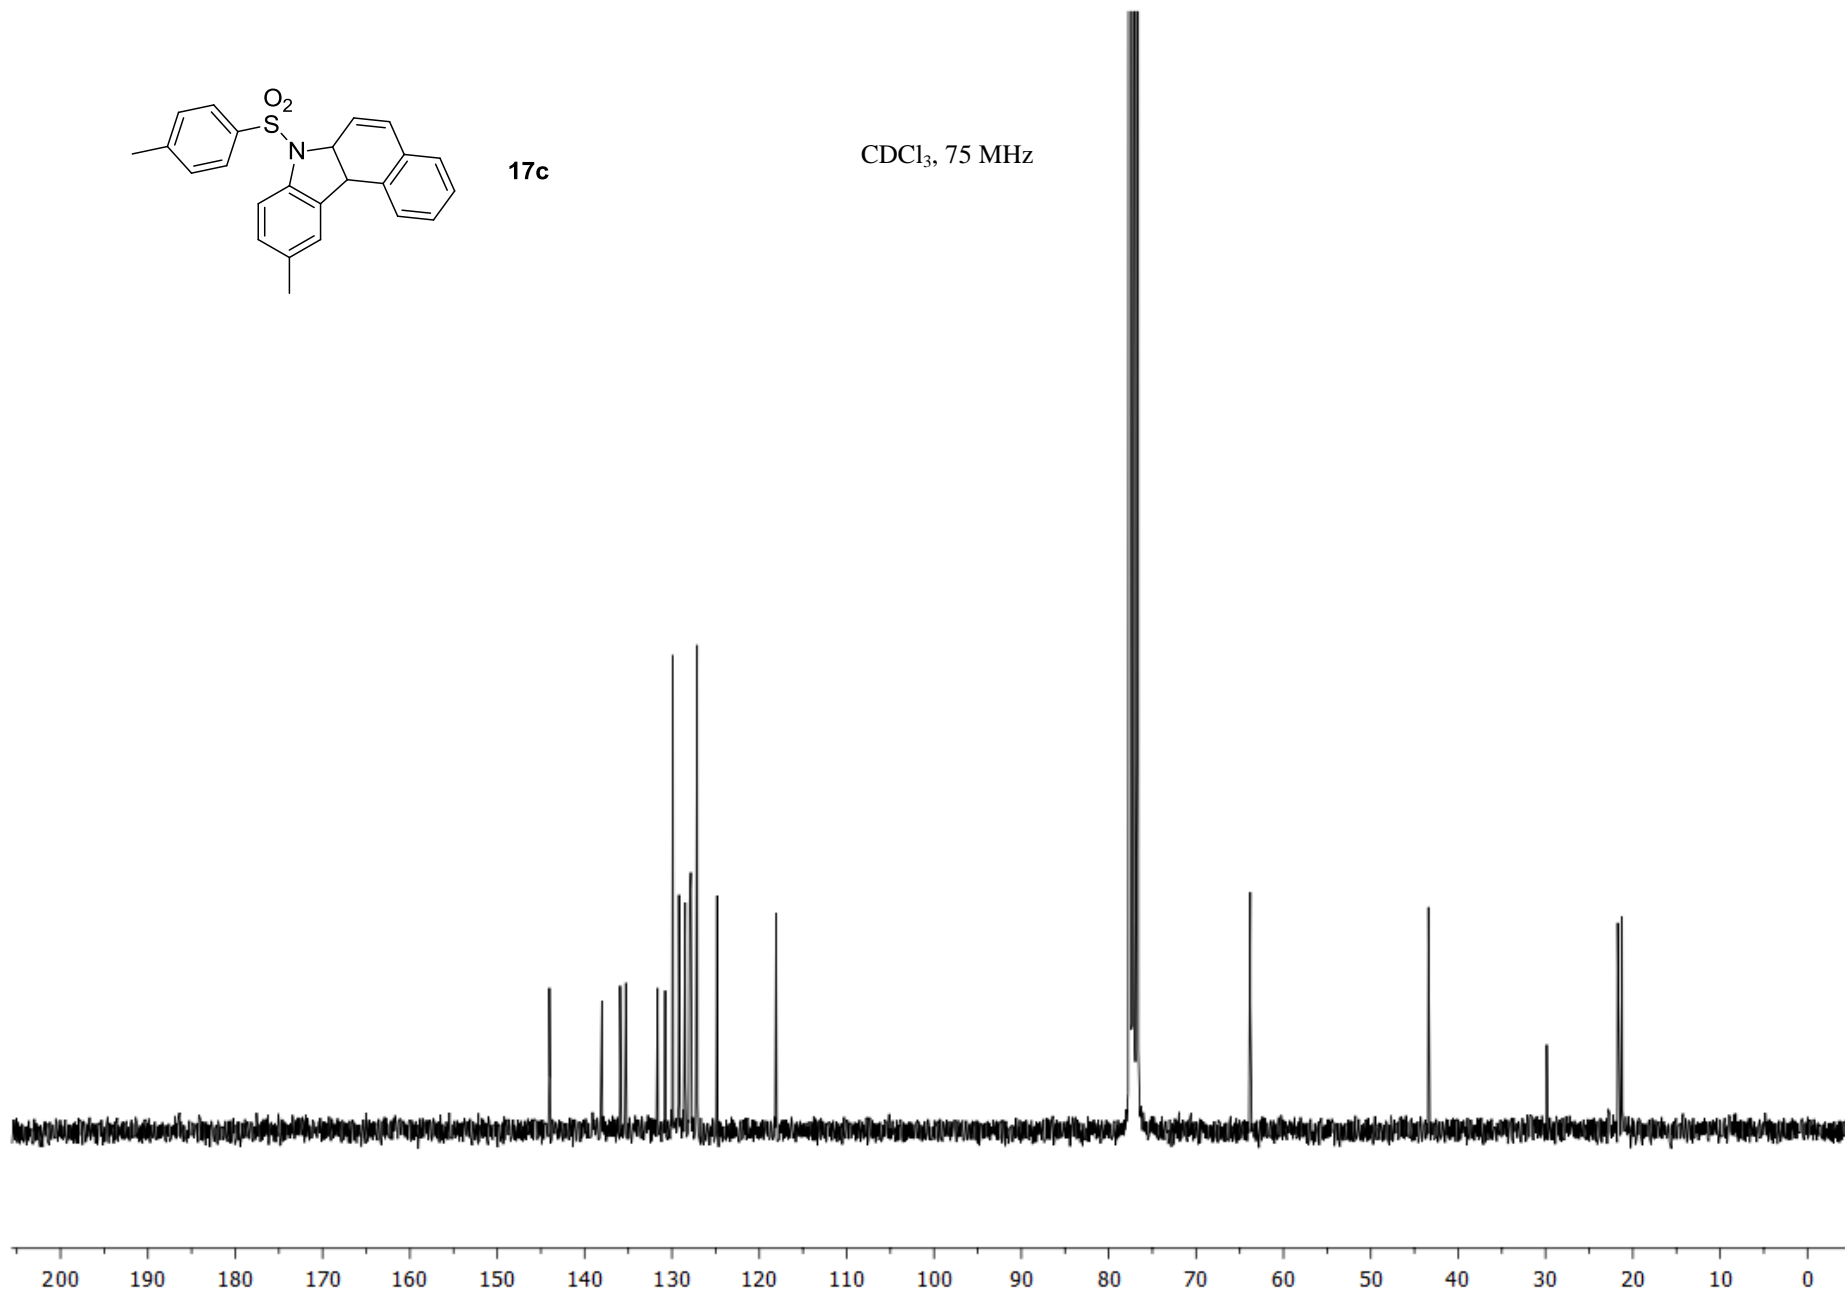

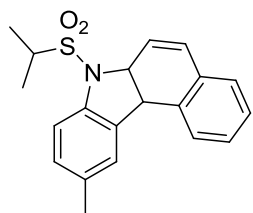

**17d**

CDCl<sub>3</sub>, 300 MHz

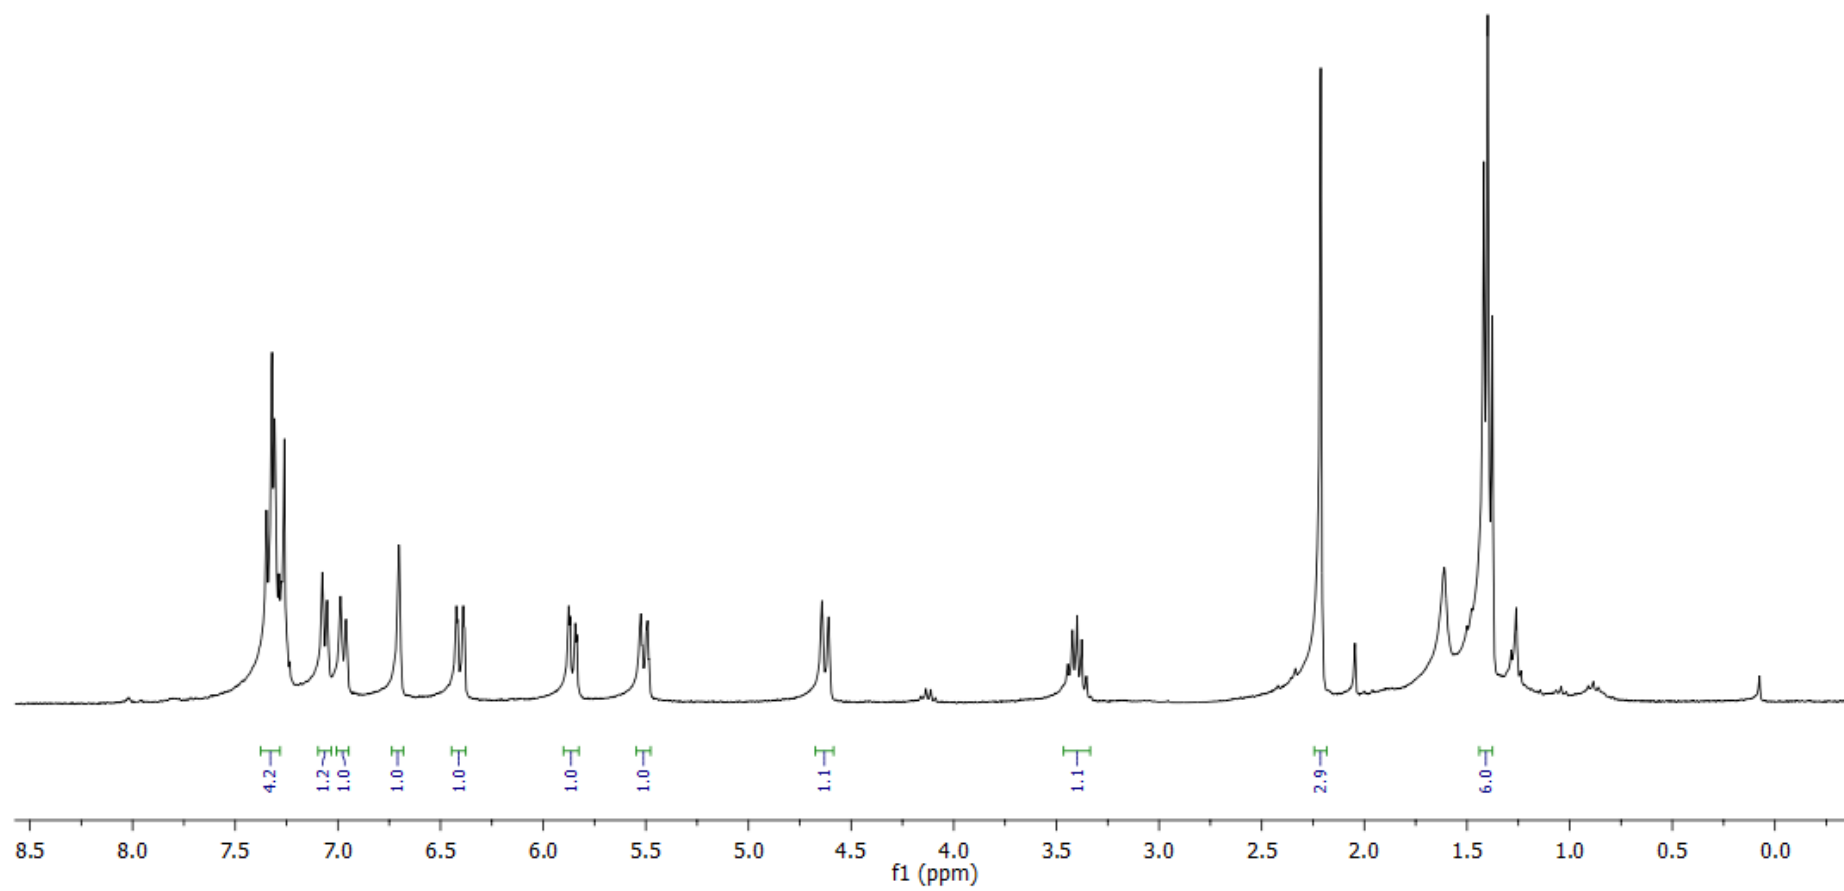

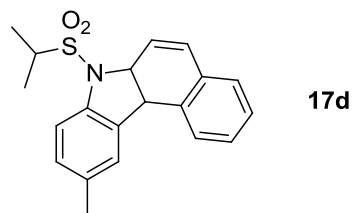

CDCl<sub>3</sub>, 75 MHz

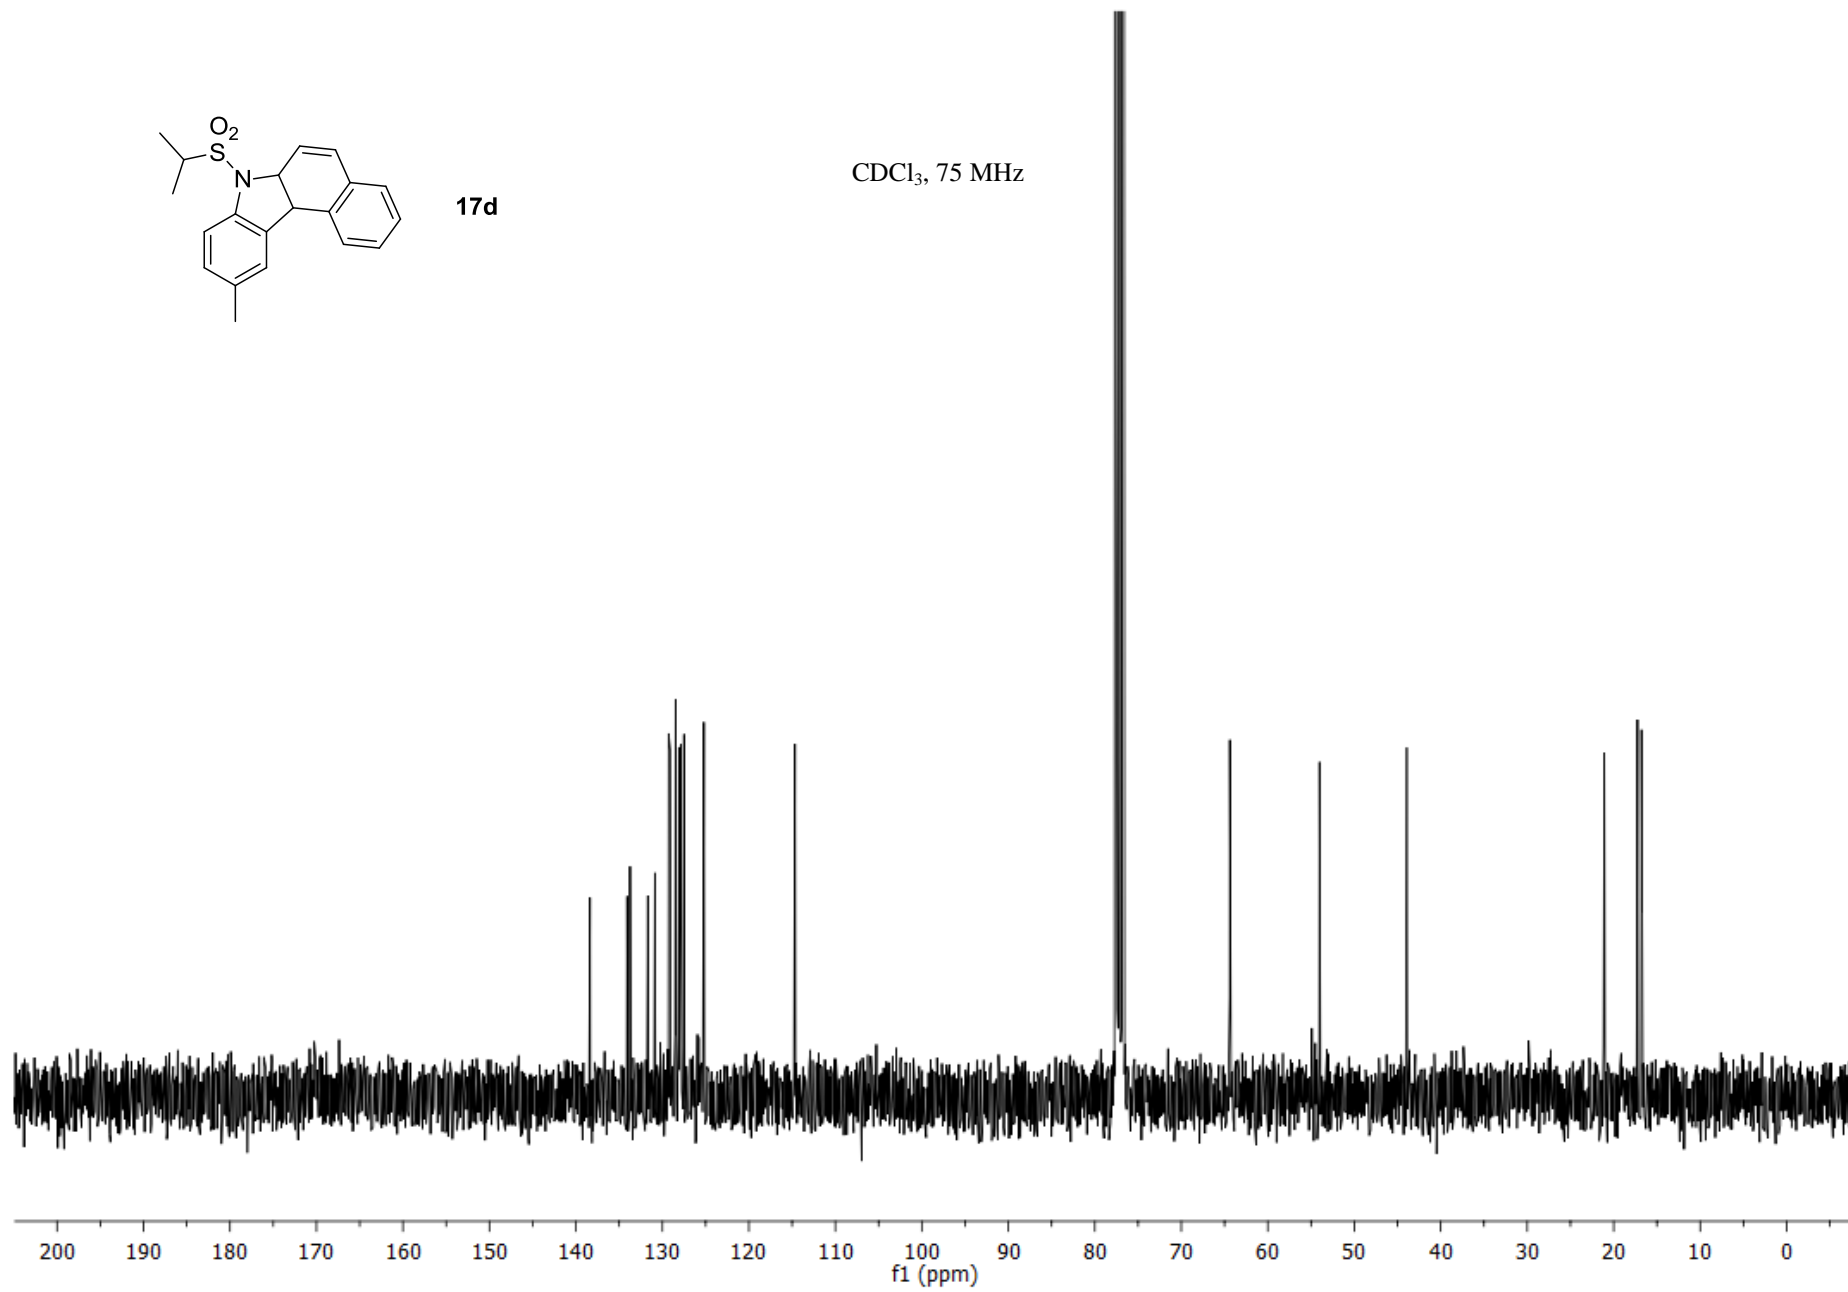

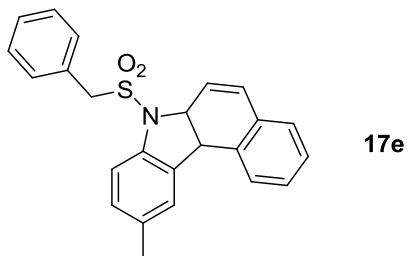

CDCl<sub>3</sub>, 300 MHz

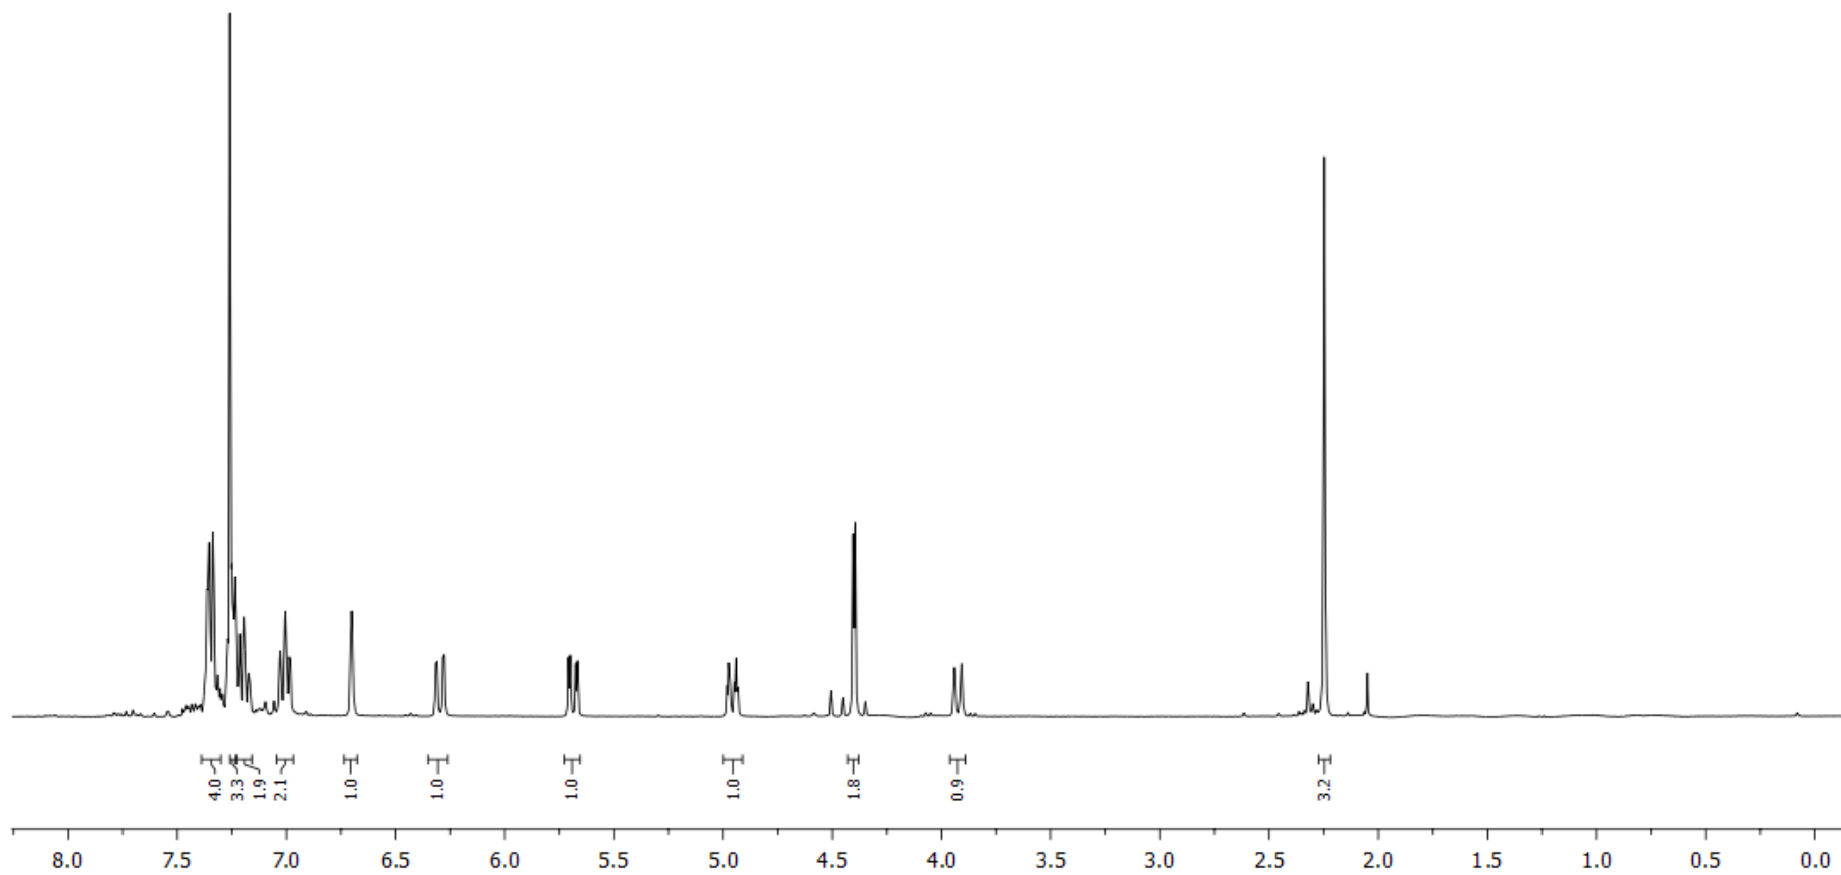



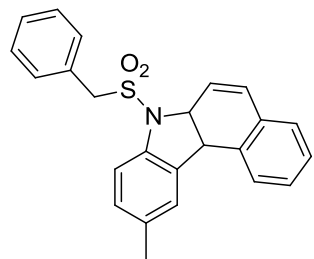

17e

CDCl<sub>3</sub>, 75 MHz

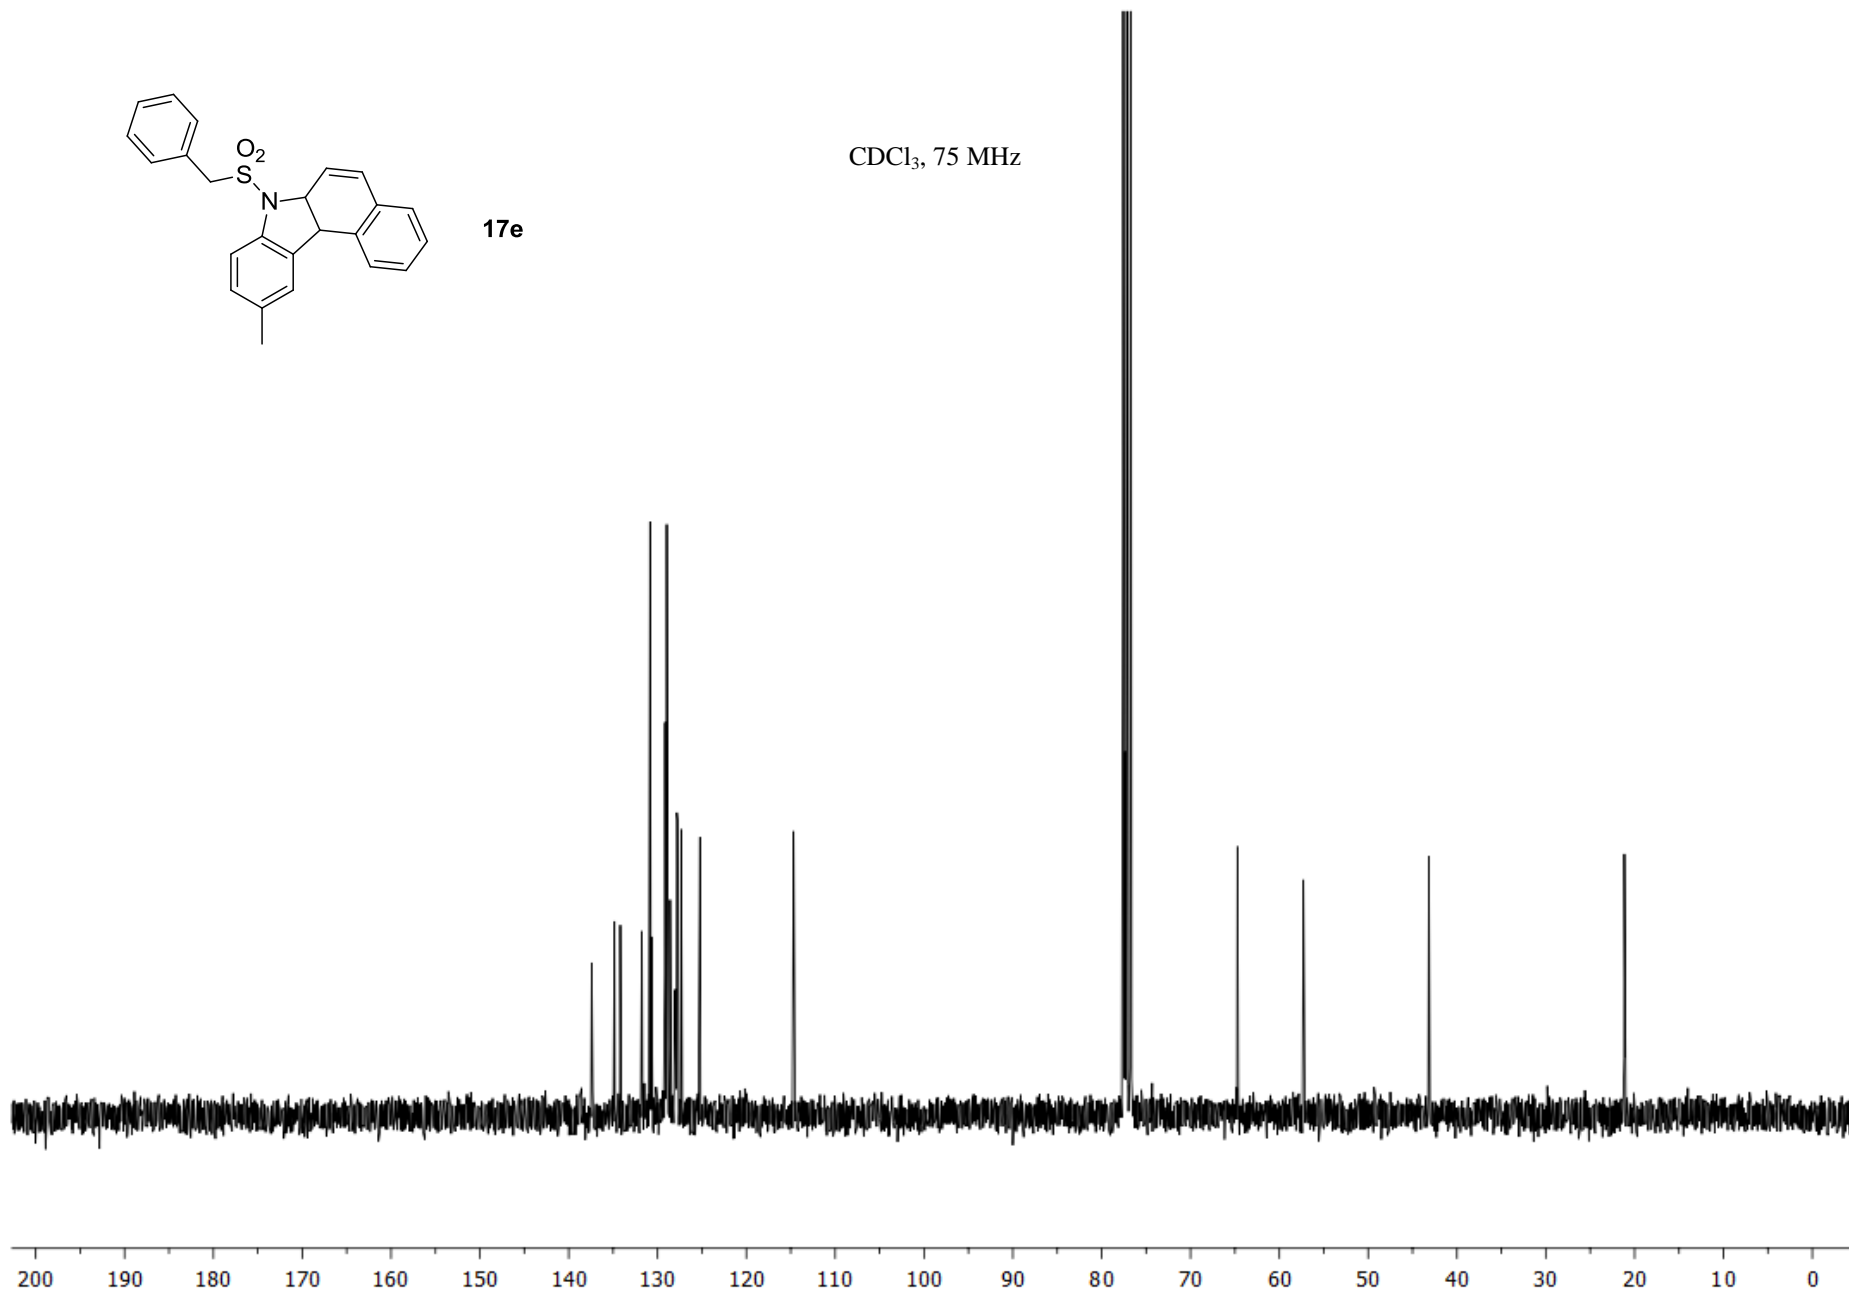

CDCl<sub>3</sub>, 300 MHz

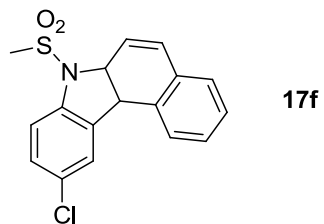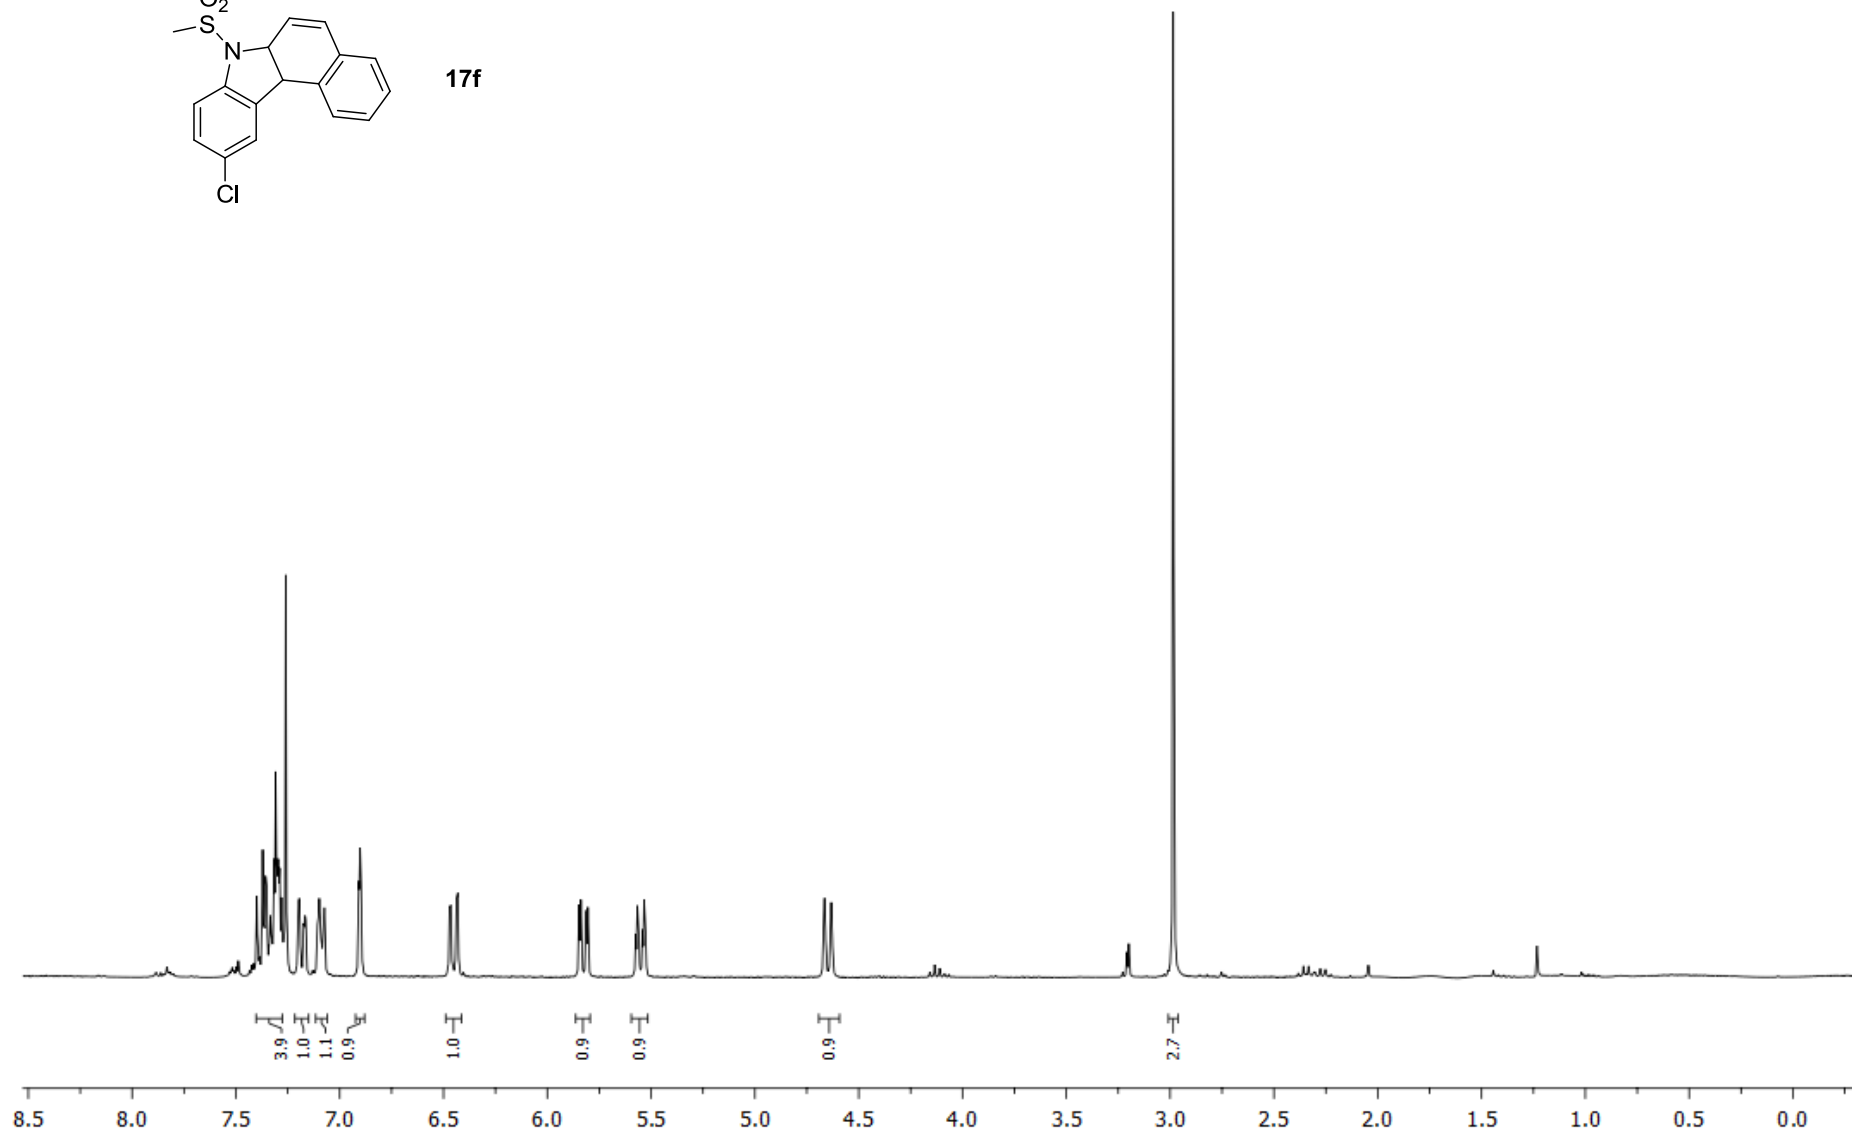

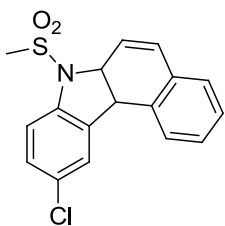

**17f**

CDCl<sub>3</sub>, 75 MHz

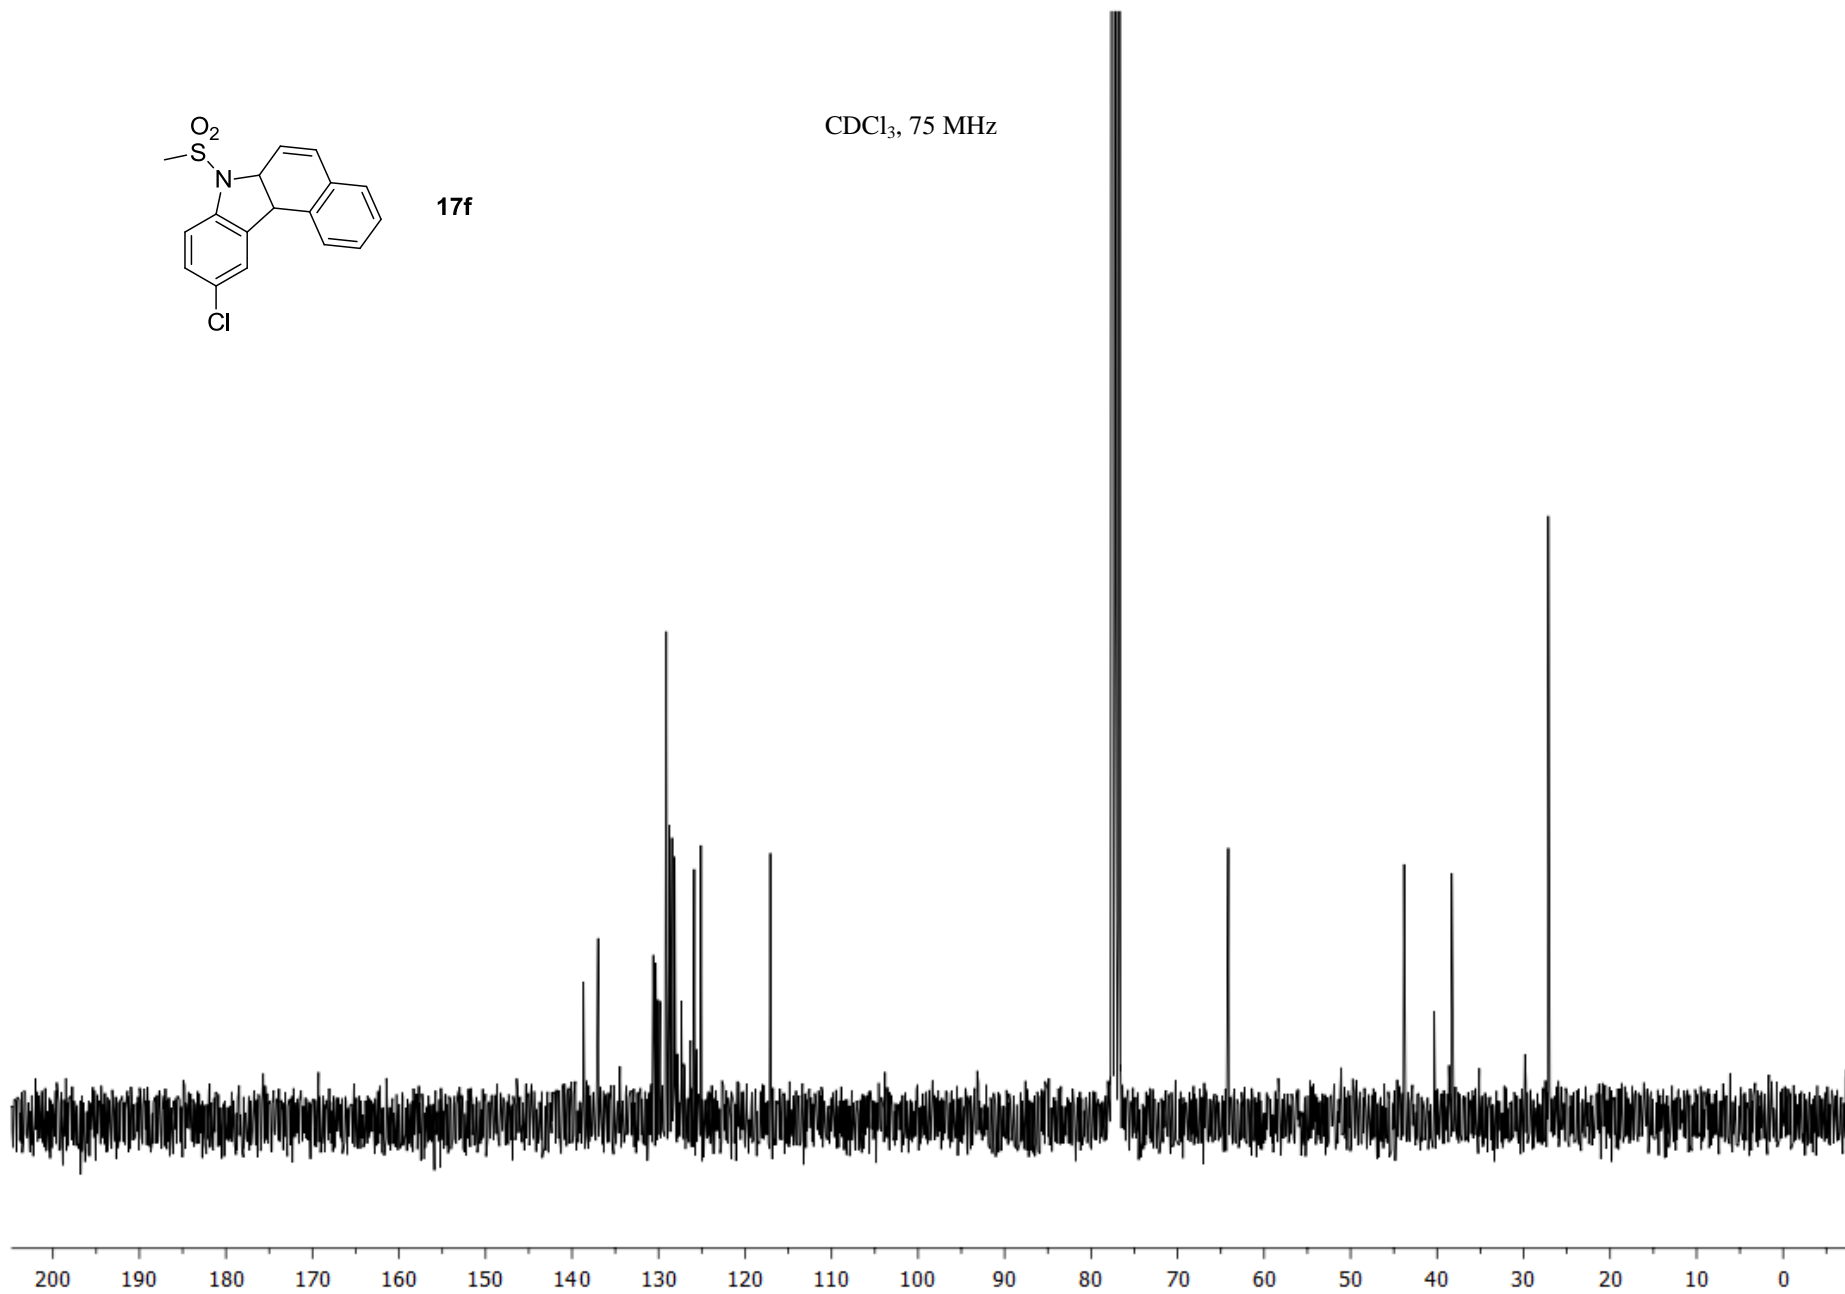

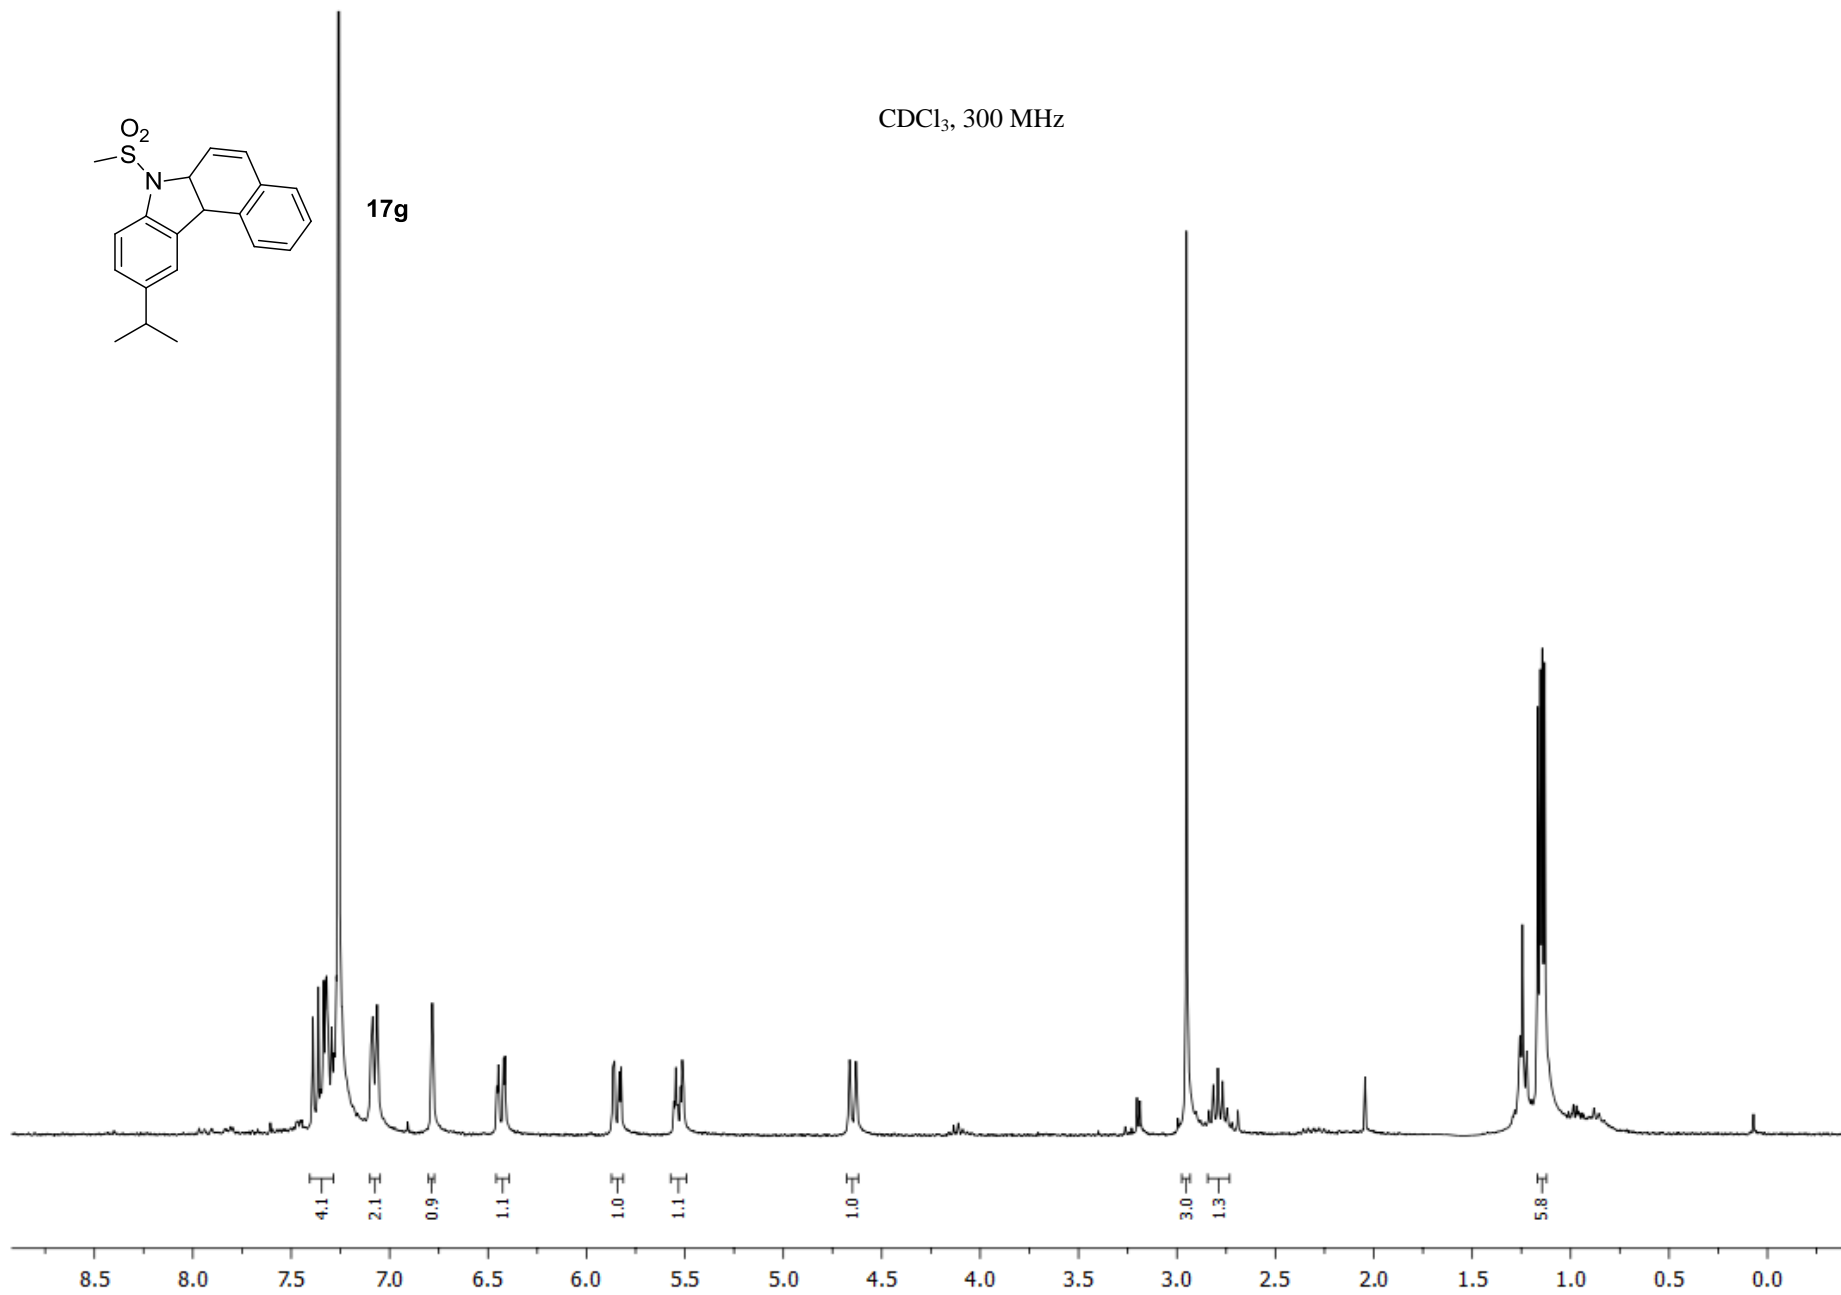

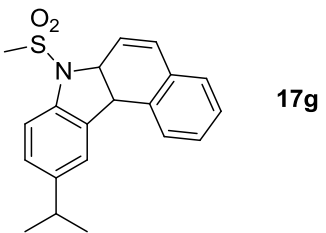

CDCl<sub>3</sub>, 75 MHz

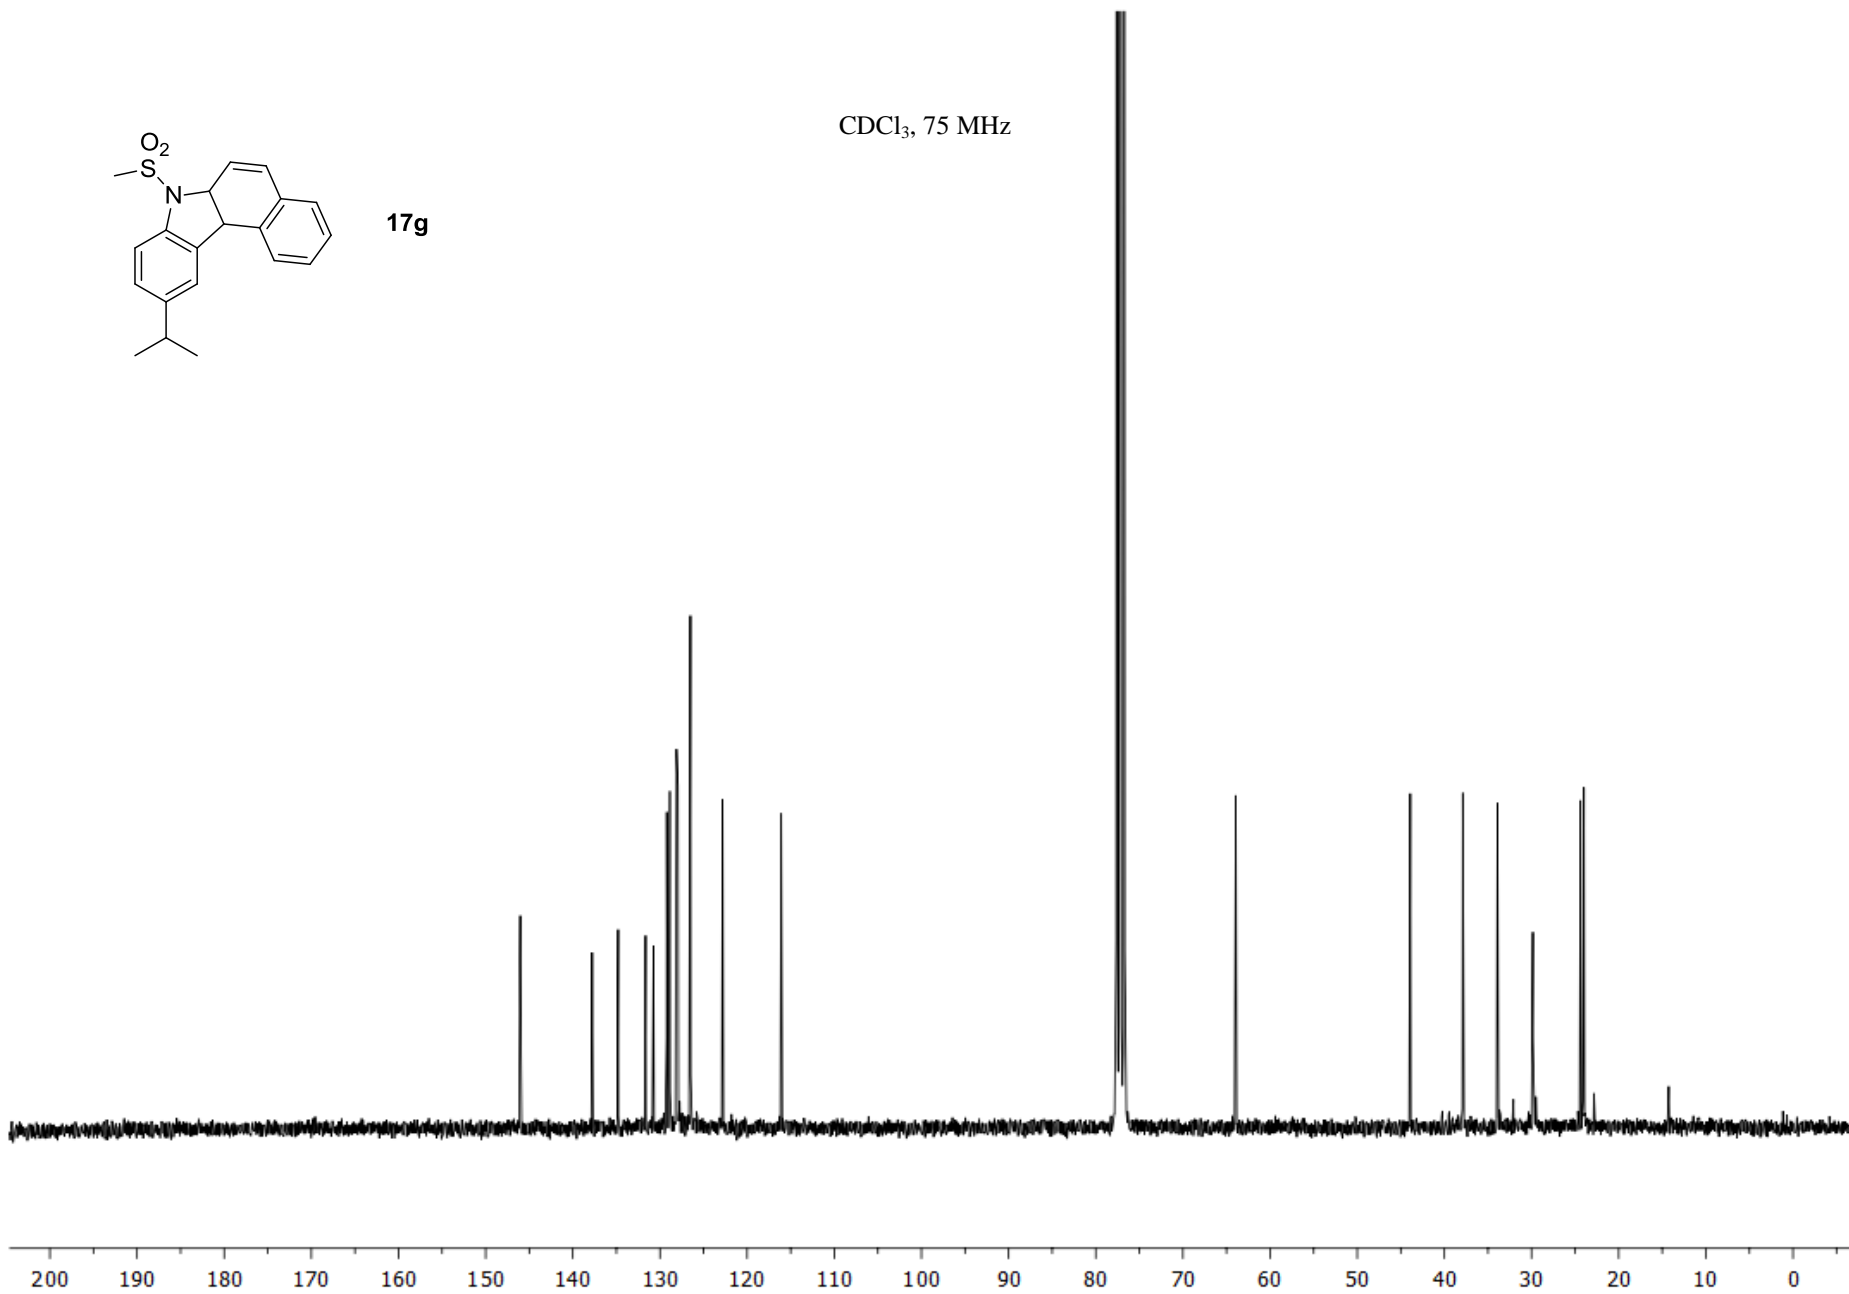

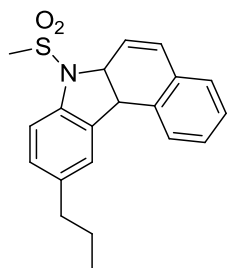

**17h**

CDCl<sub>3</sub>, 300 MHz

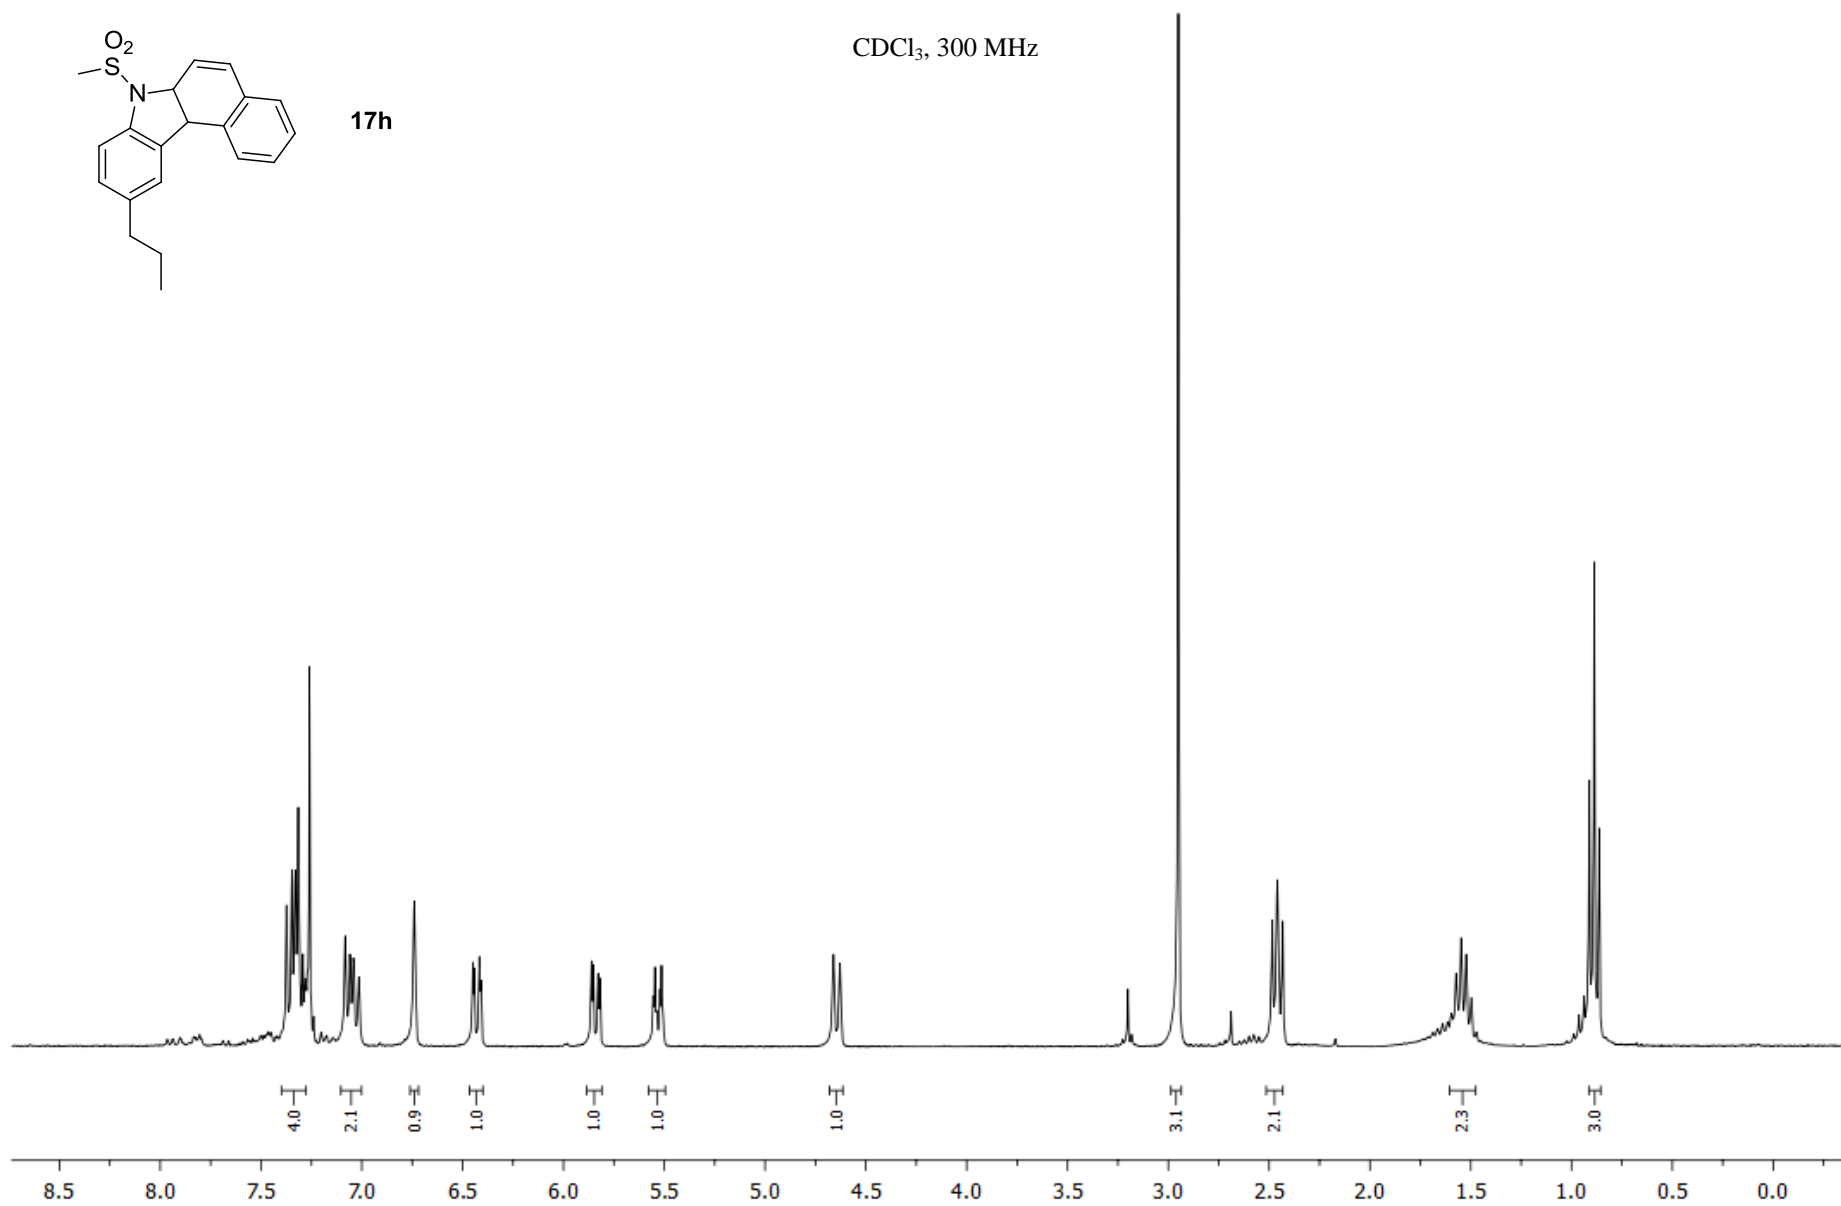

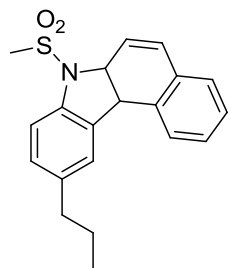

**17h**

CDCl<sub>3</sub>, 75 MHz

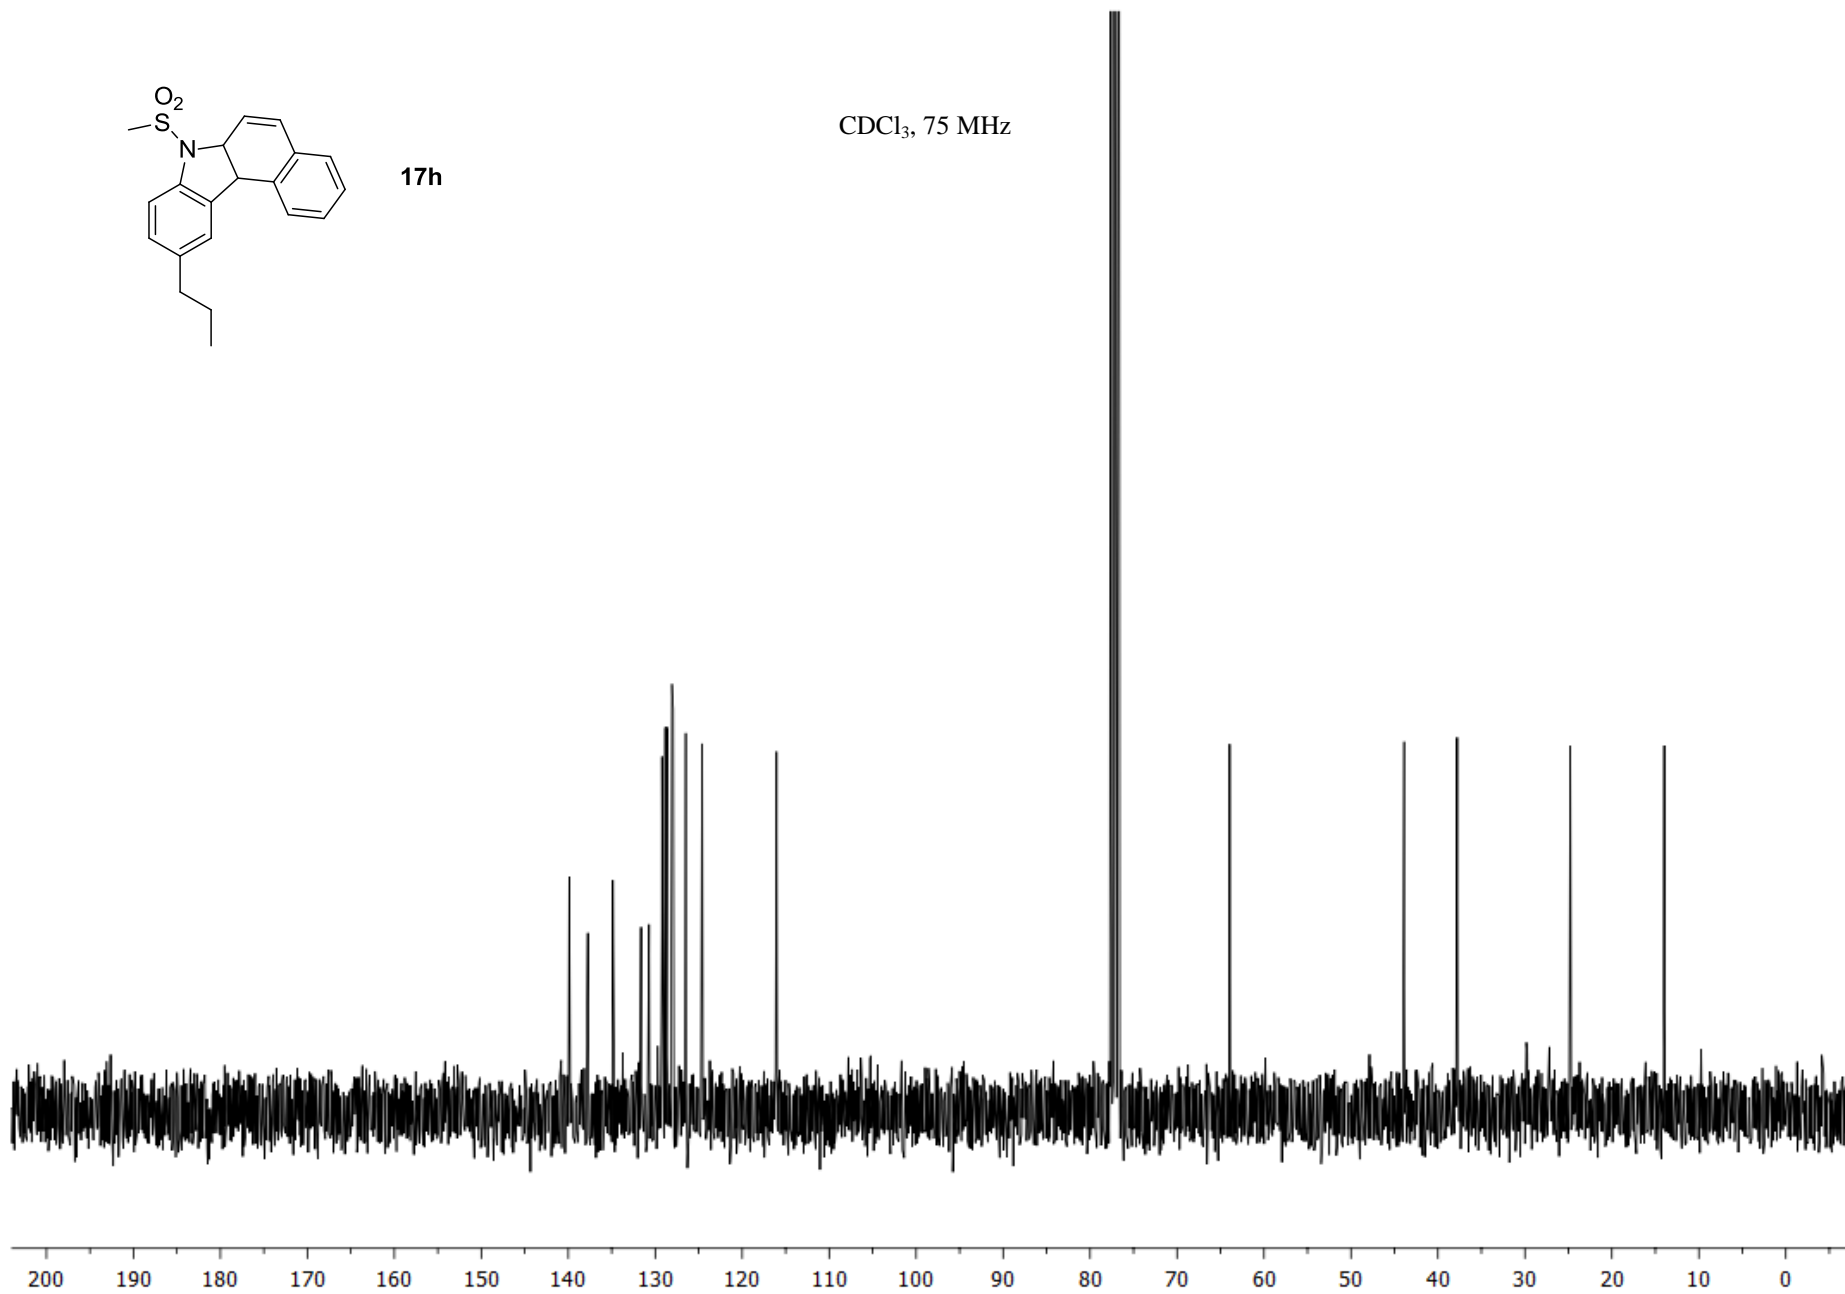

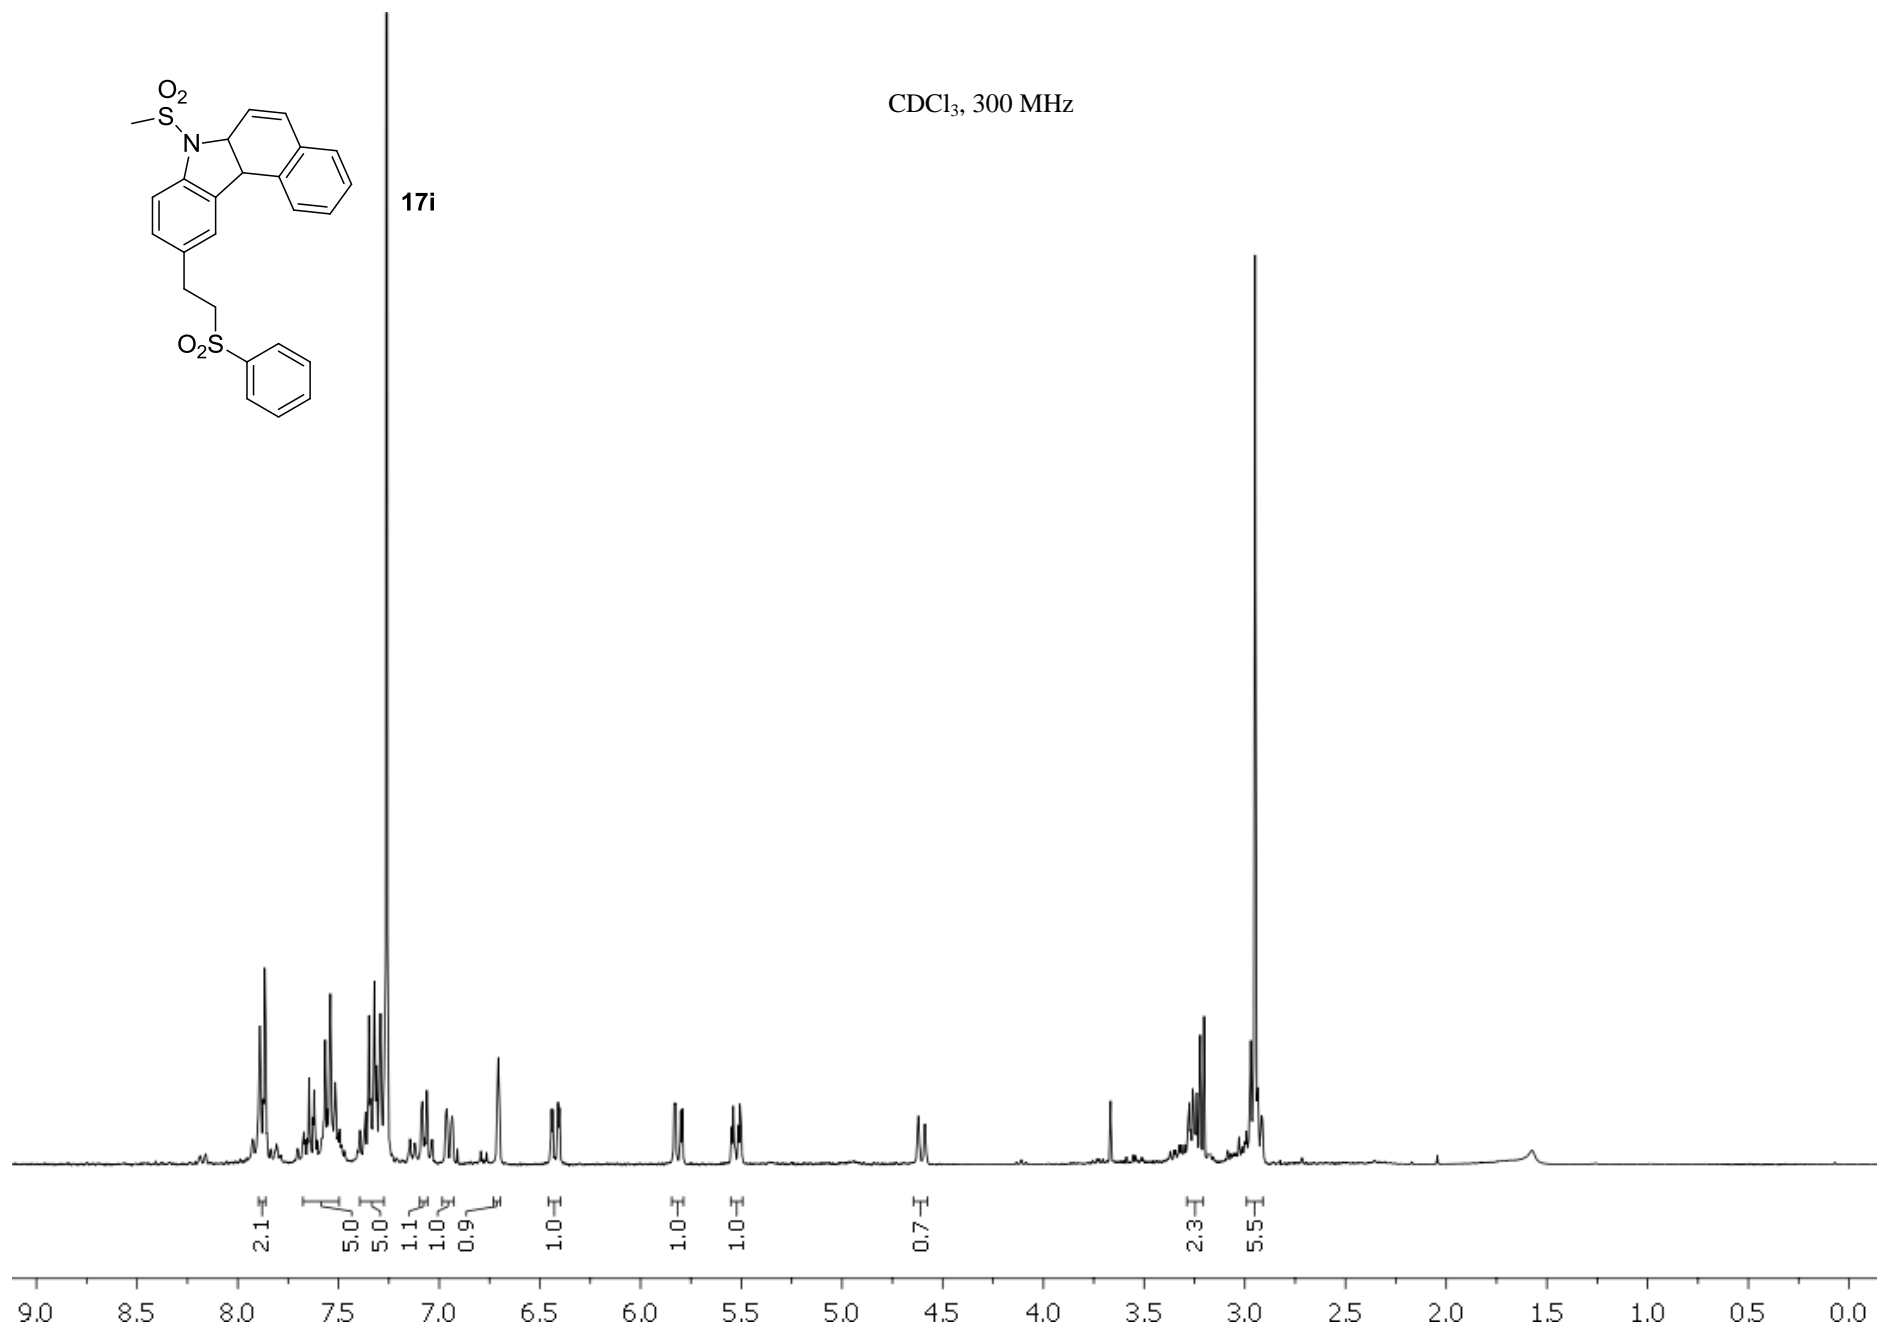



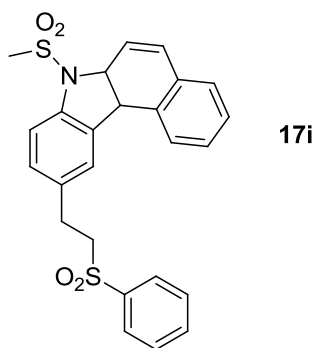

CDCl<sub>3</sub>, 75 MHz

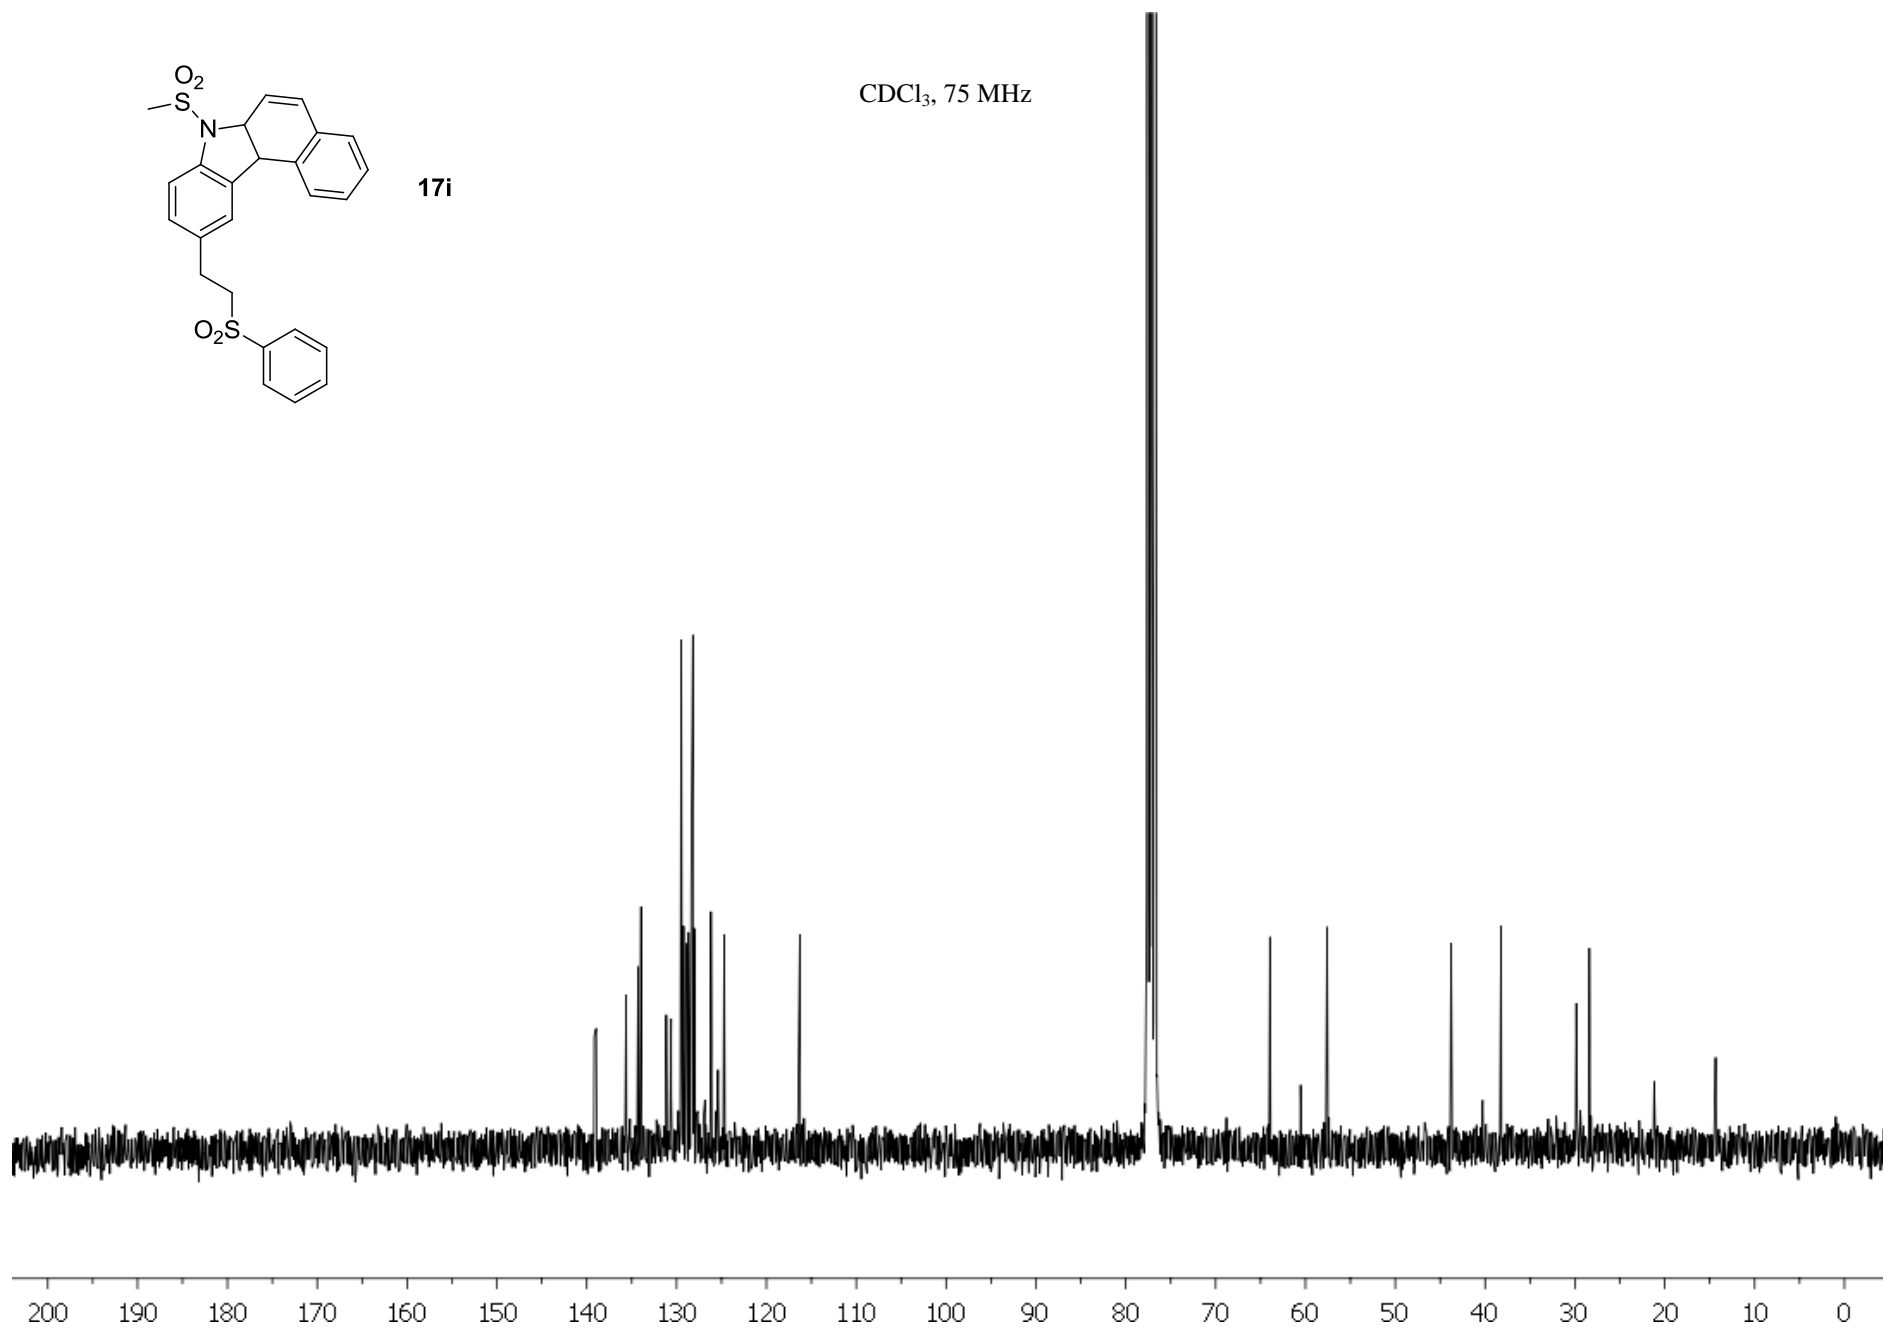

CDCl<sub>3</sub>, 300 MHz

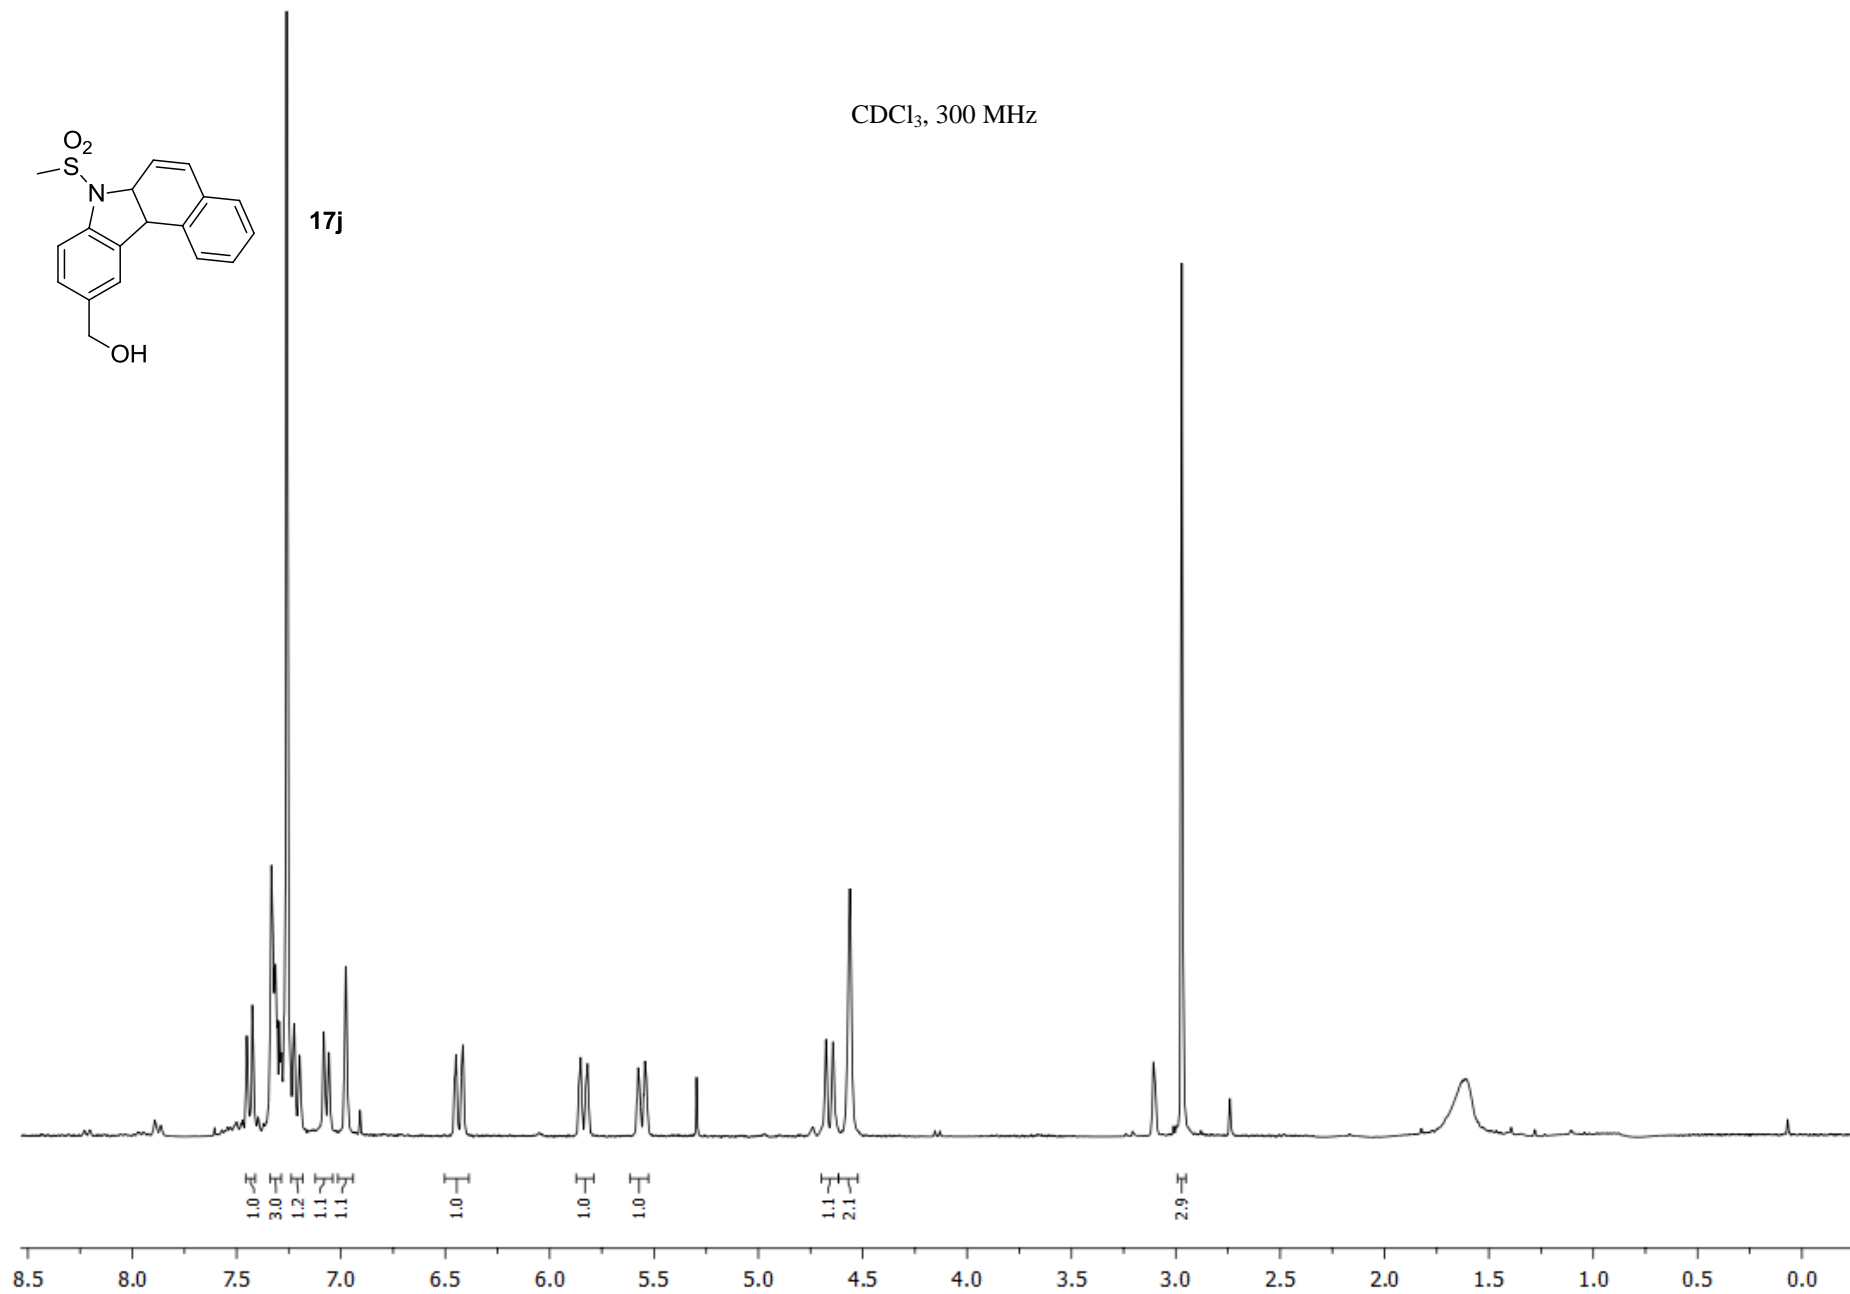

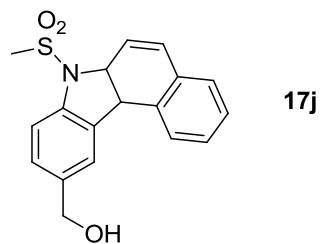

CDCl<sub>3</sub>, 75 MHz

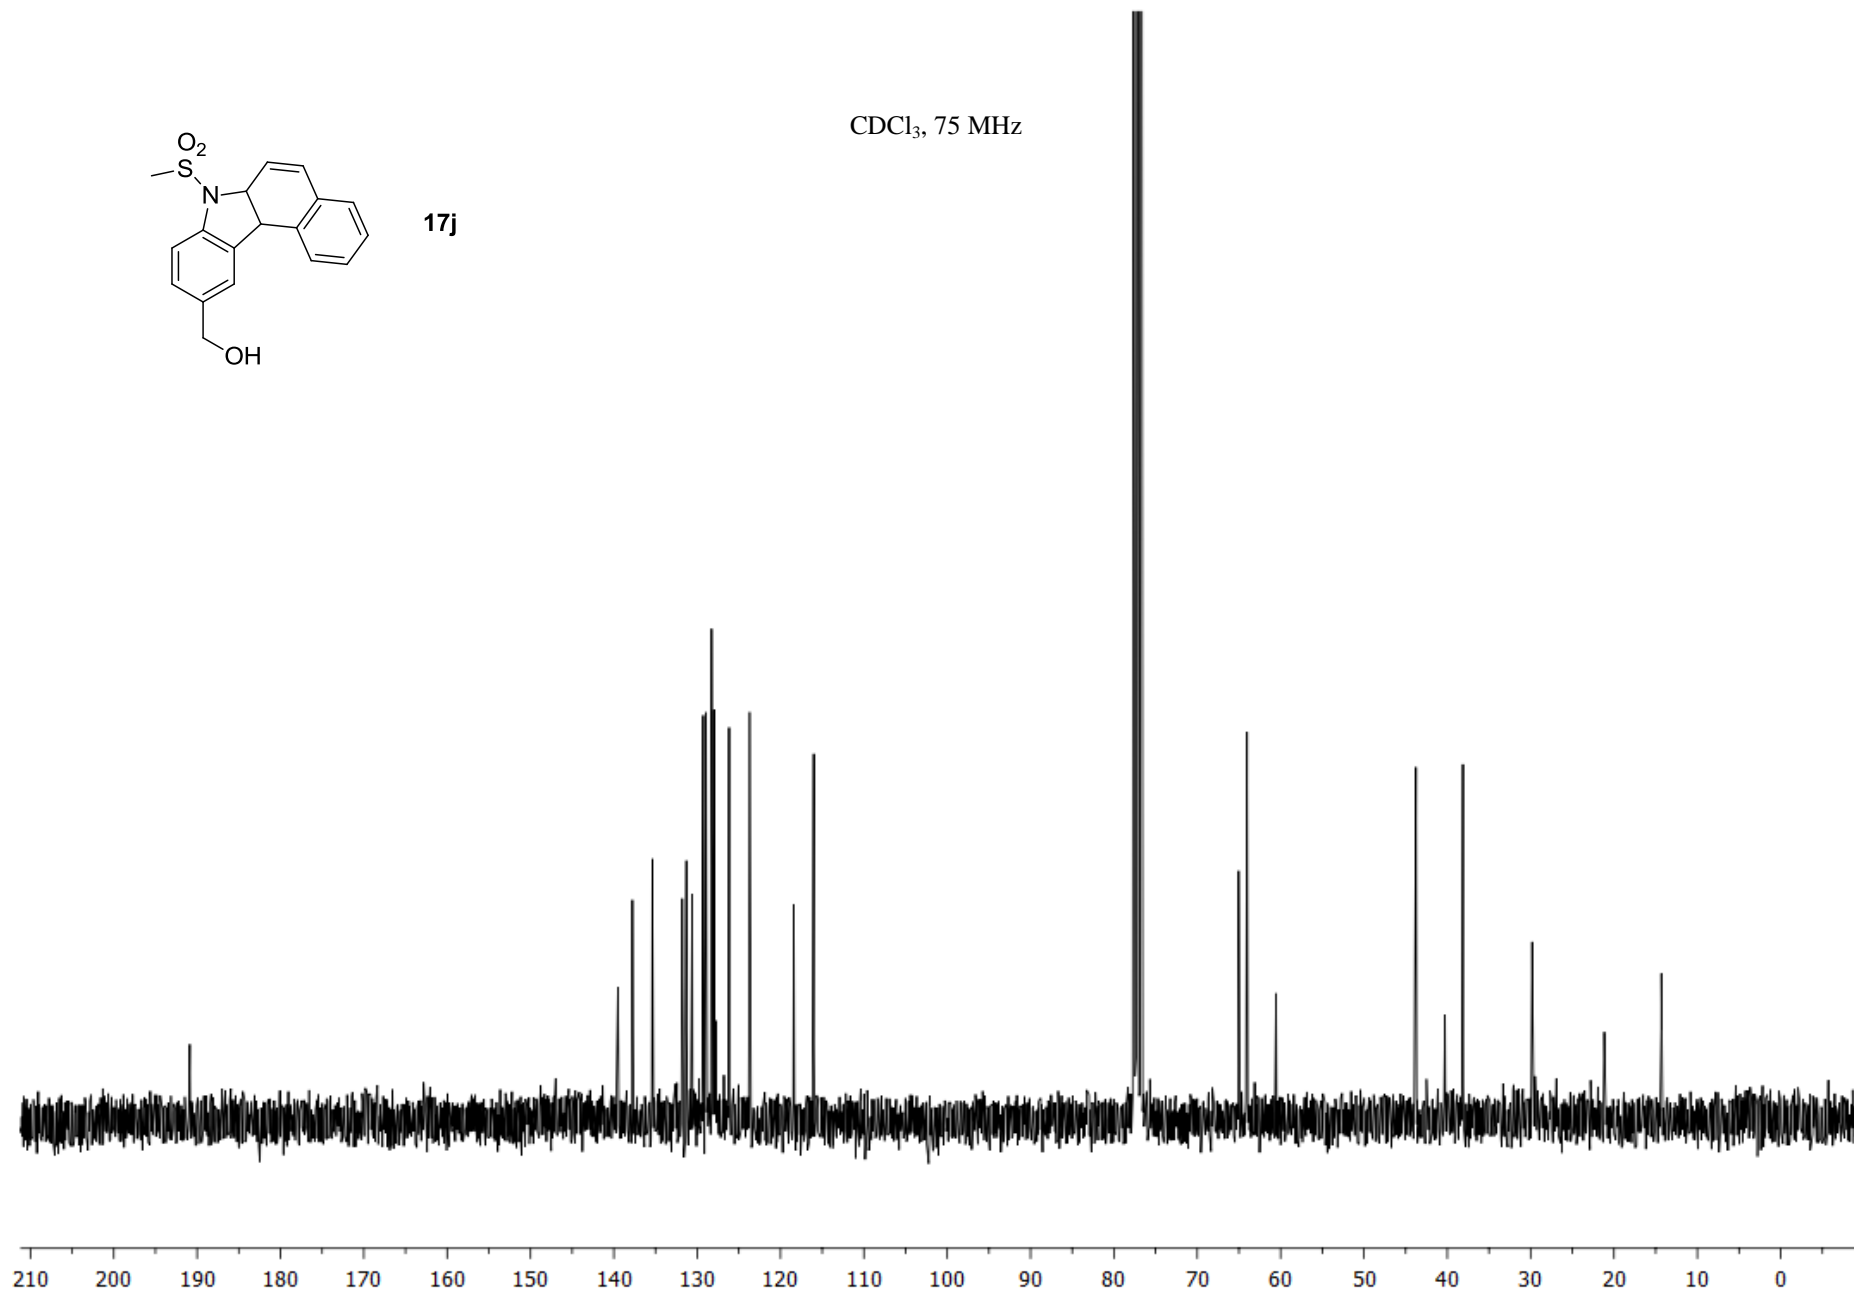

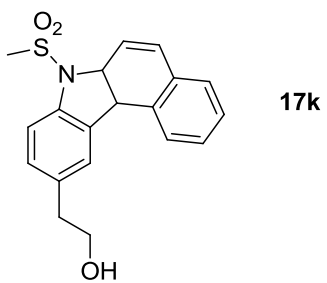

CDCl<sub>3</sub>, 300 MHz

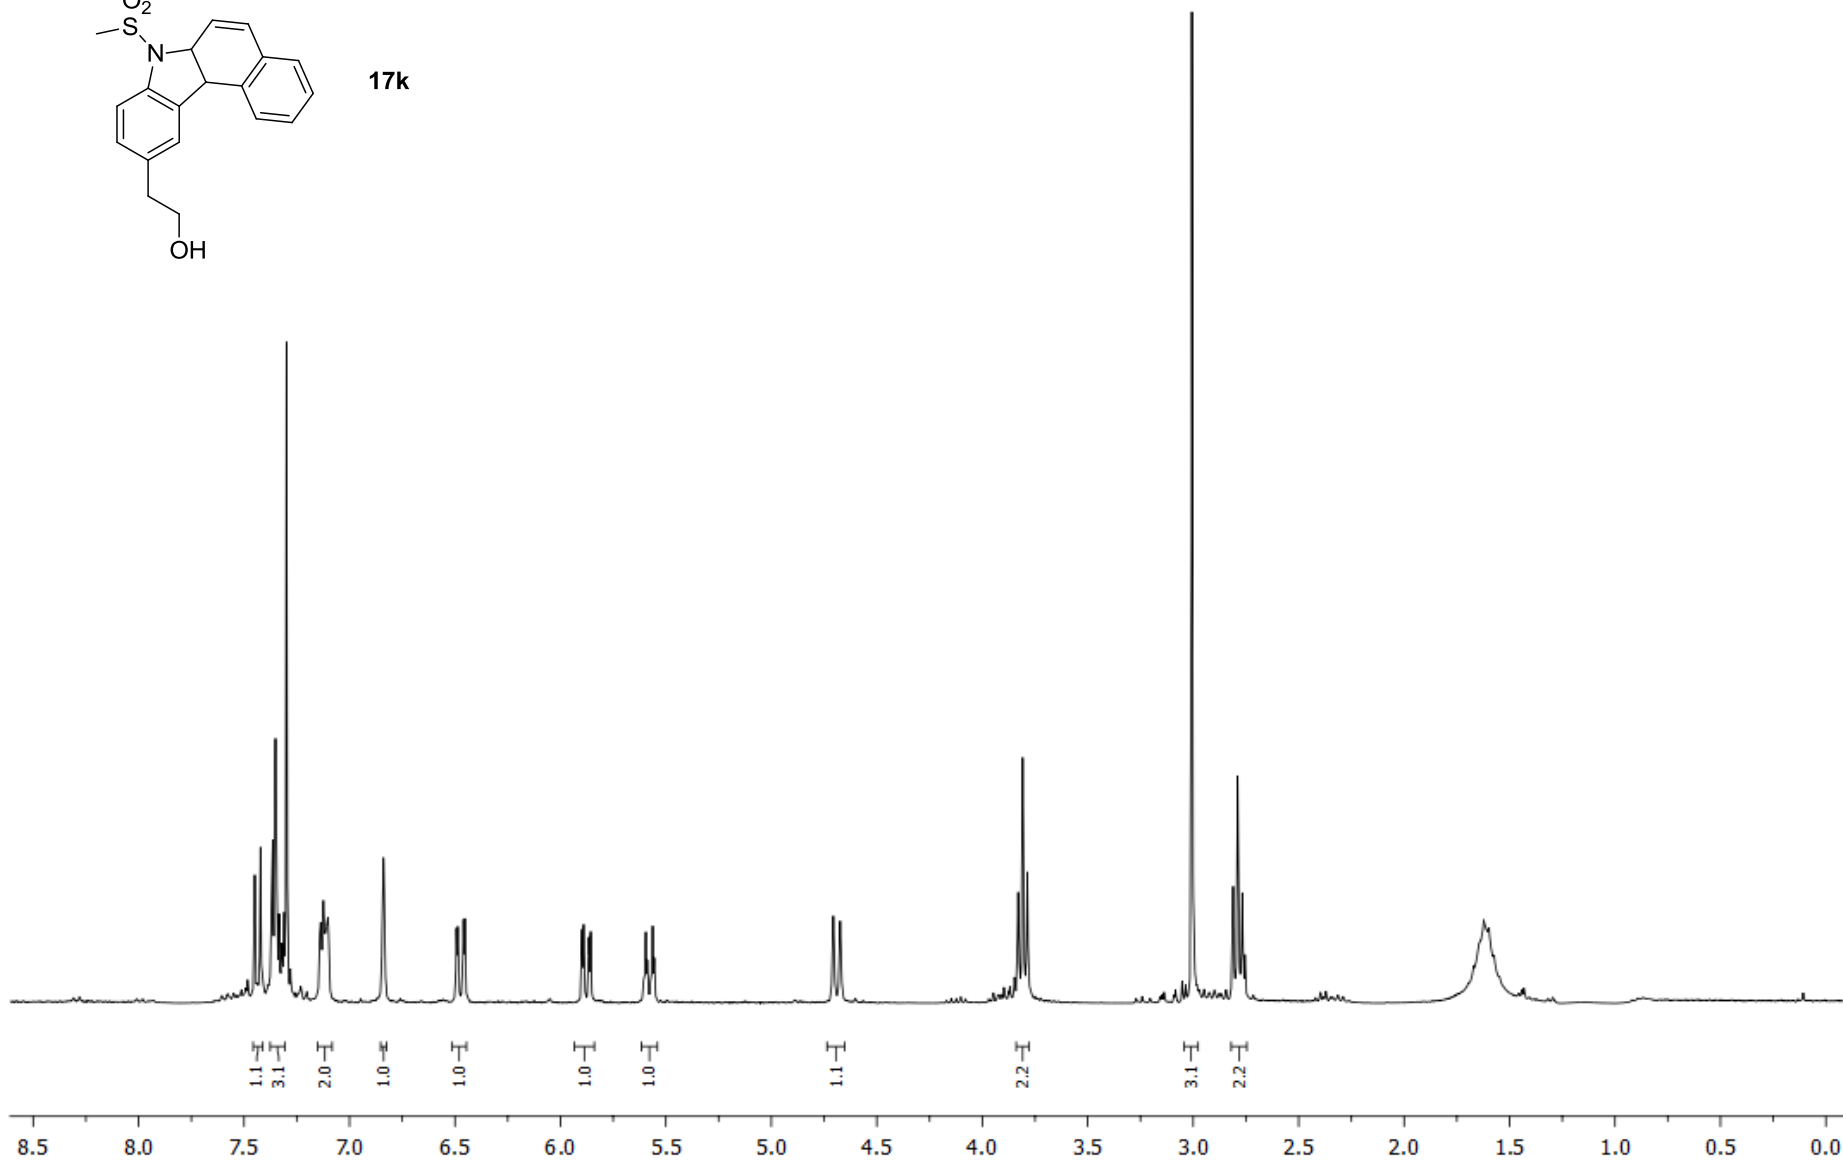

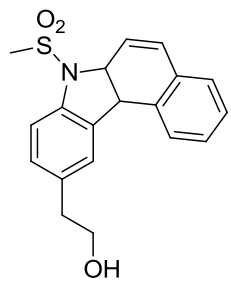

17k

CDCl<sub>3</sub>, 75 MHz

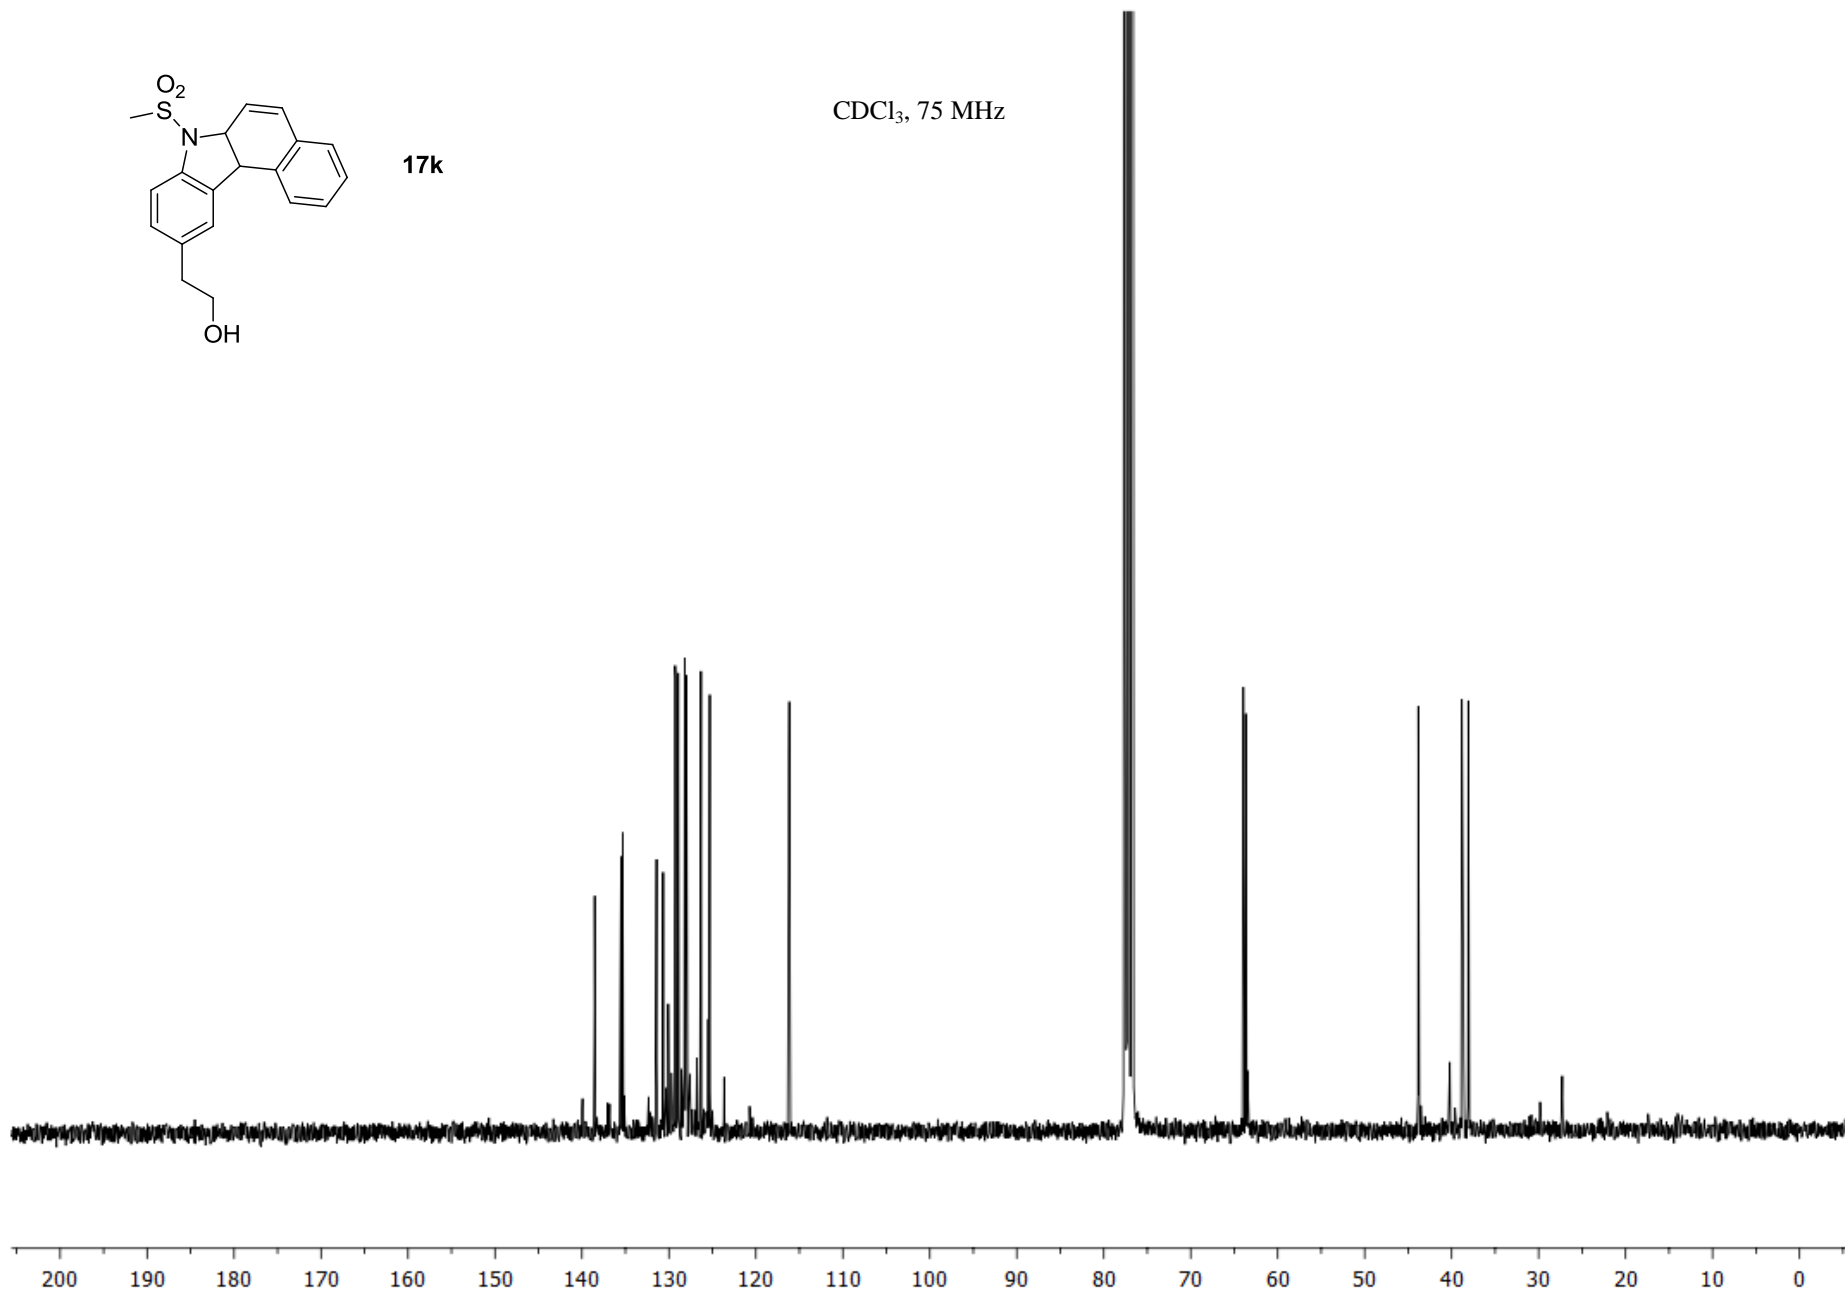

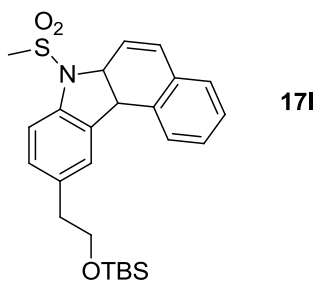

CDCl<sub>3</sub>, 300 MHz

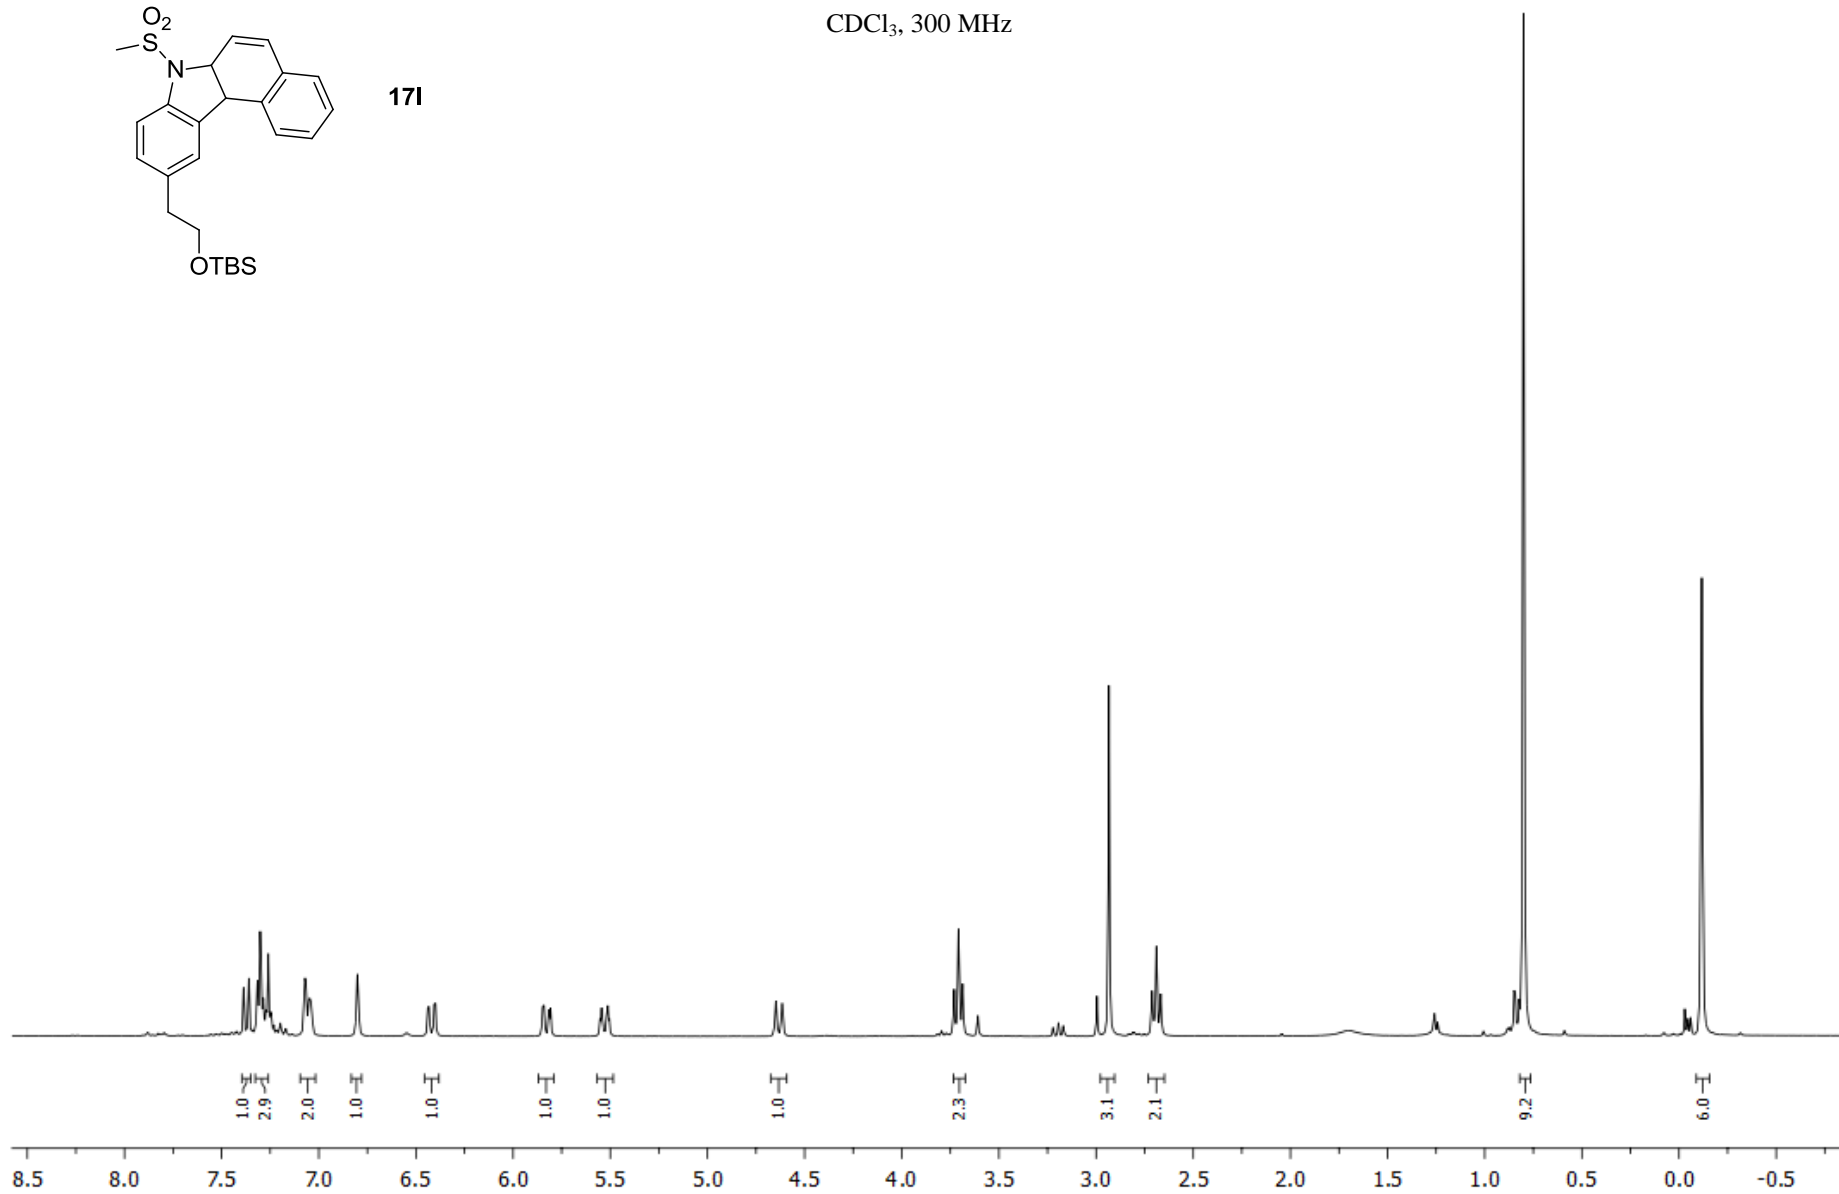

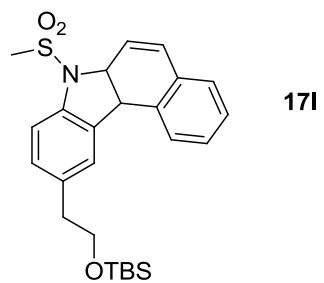

CDCl<sub>3</sub>, 75 MHz

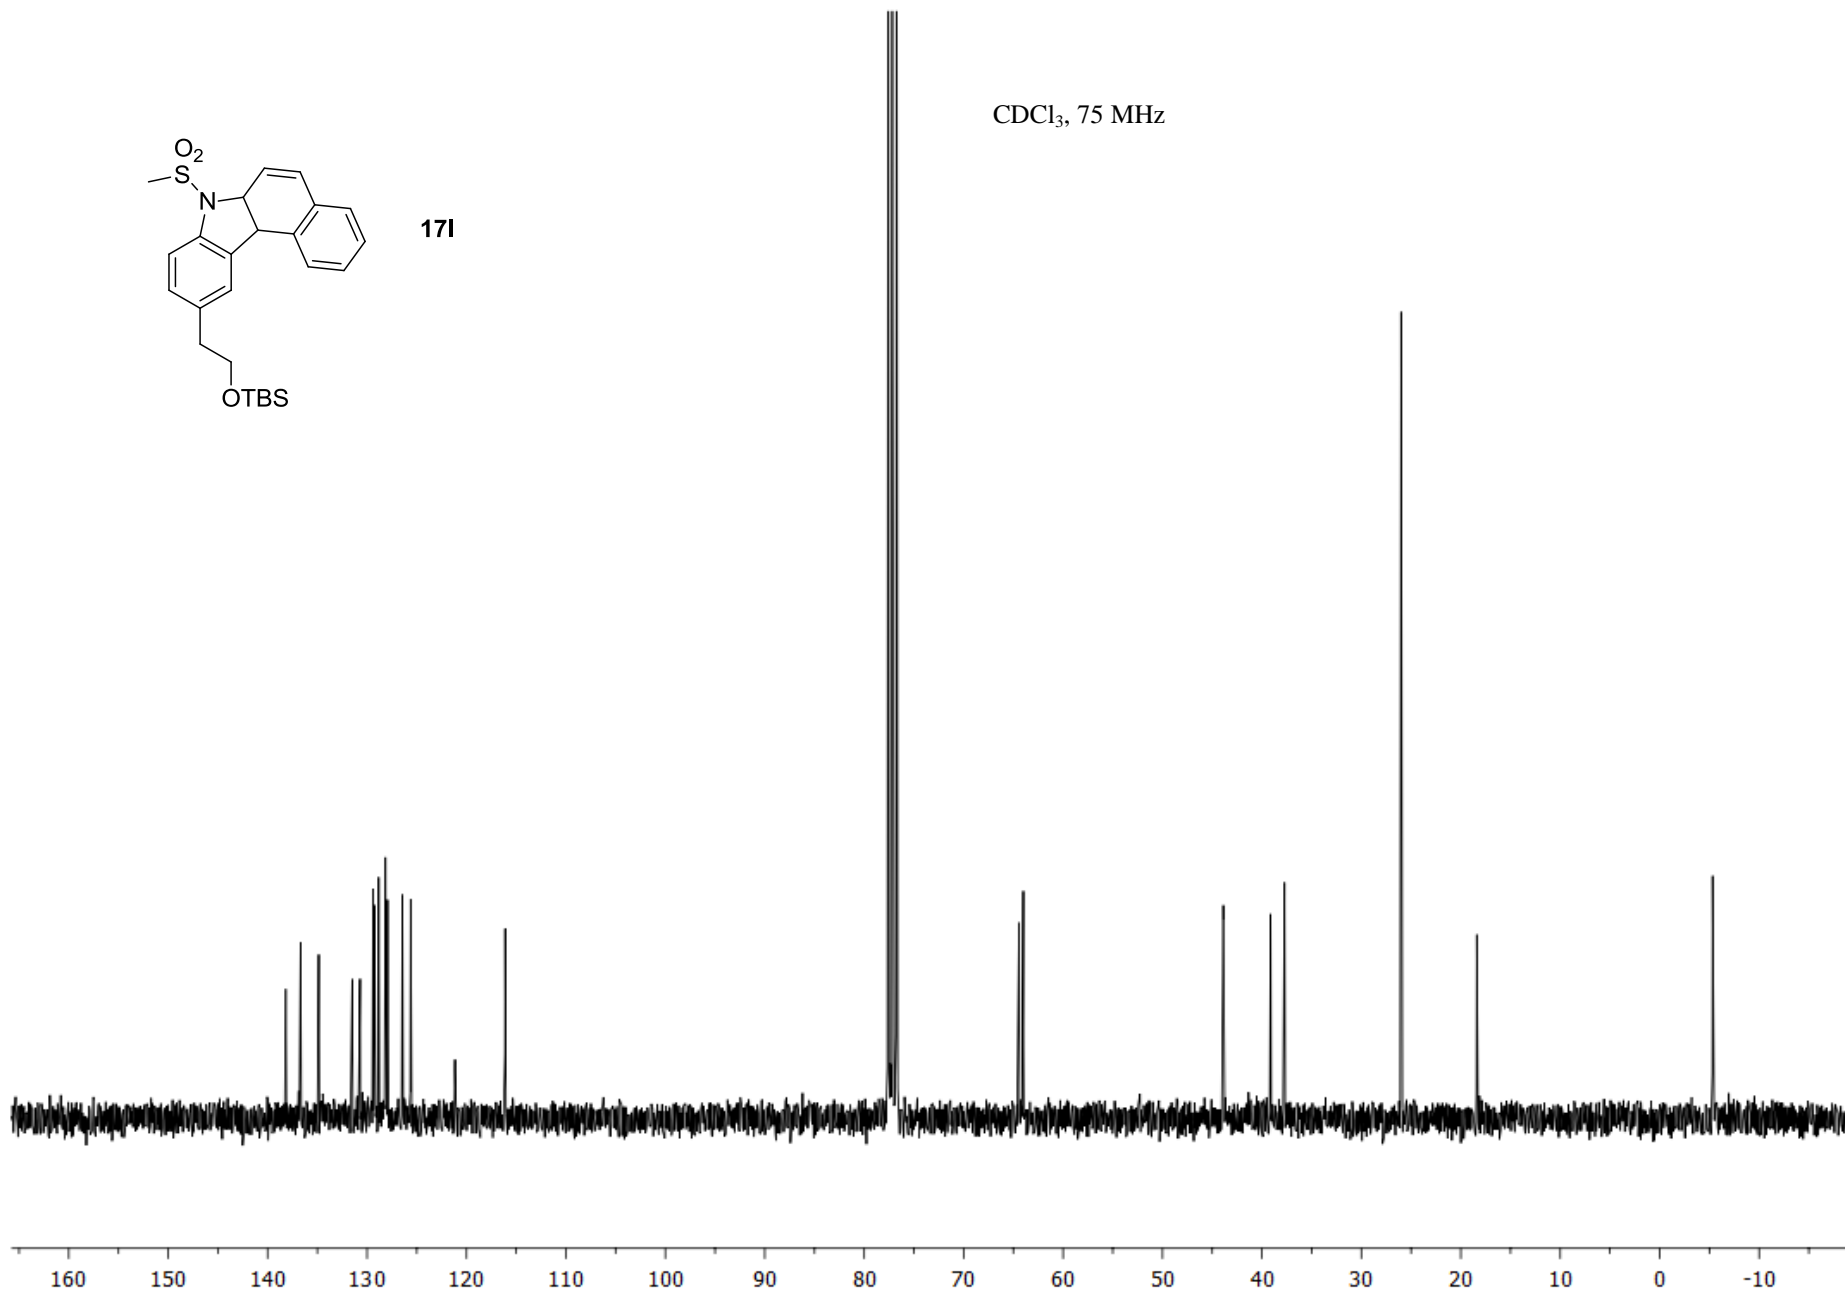

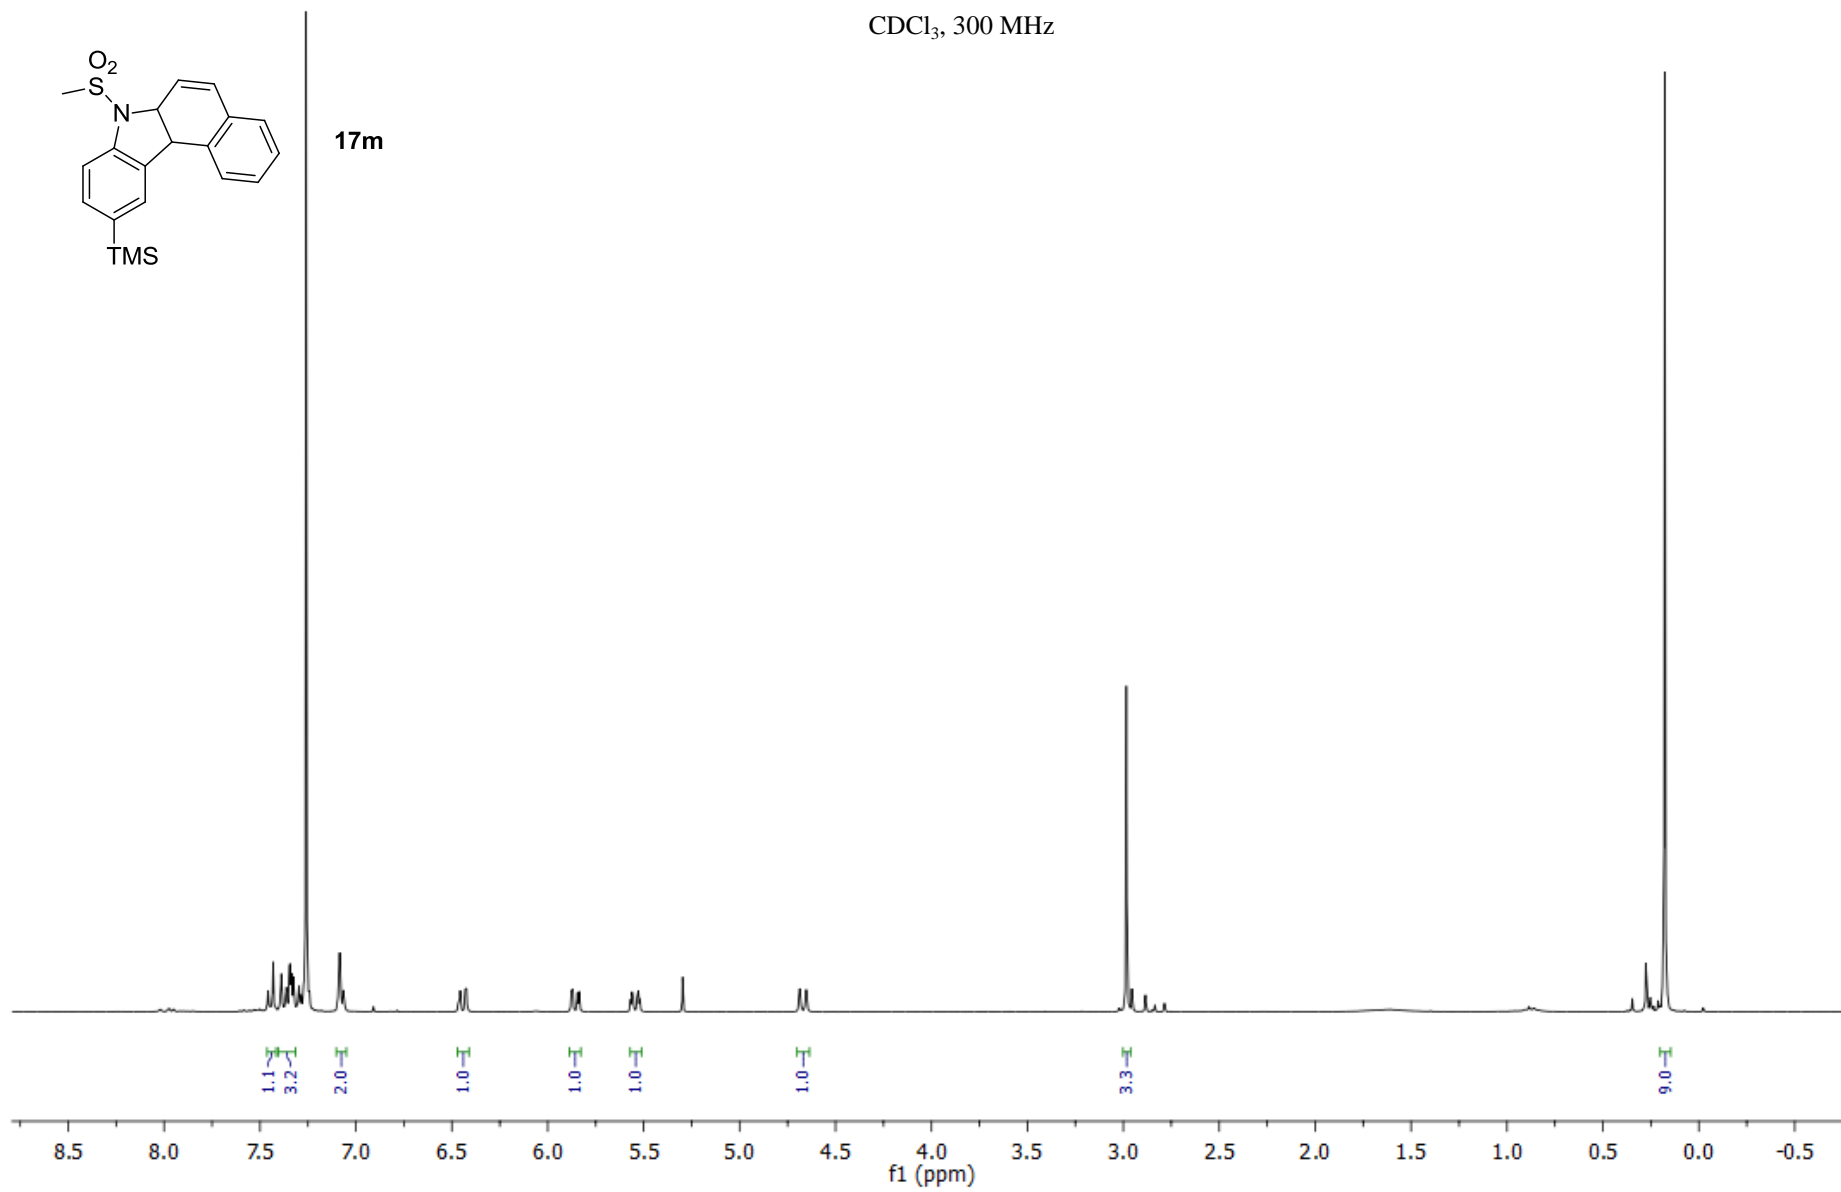



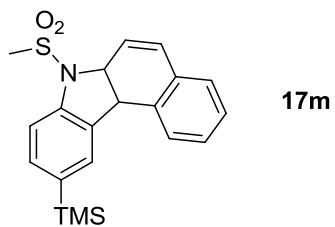

CDCl<sub>3</sub>, 75 MHz

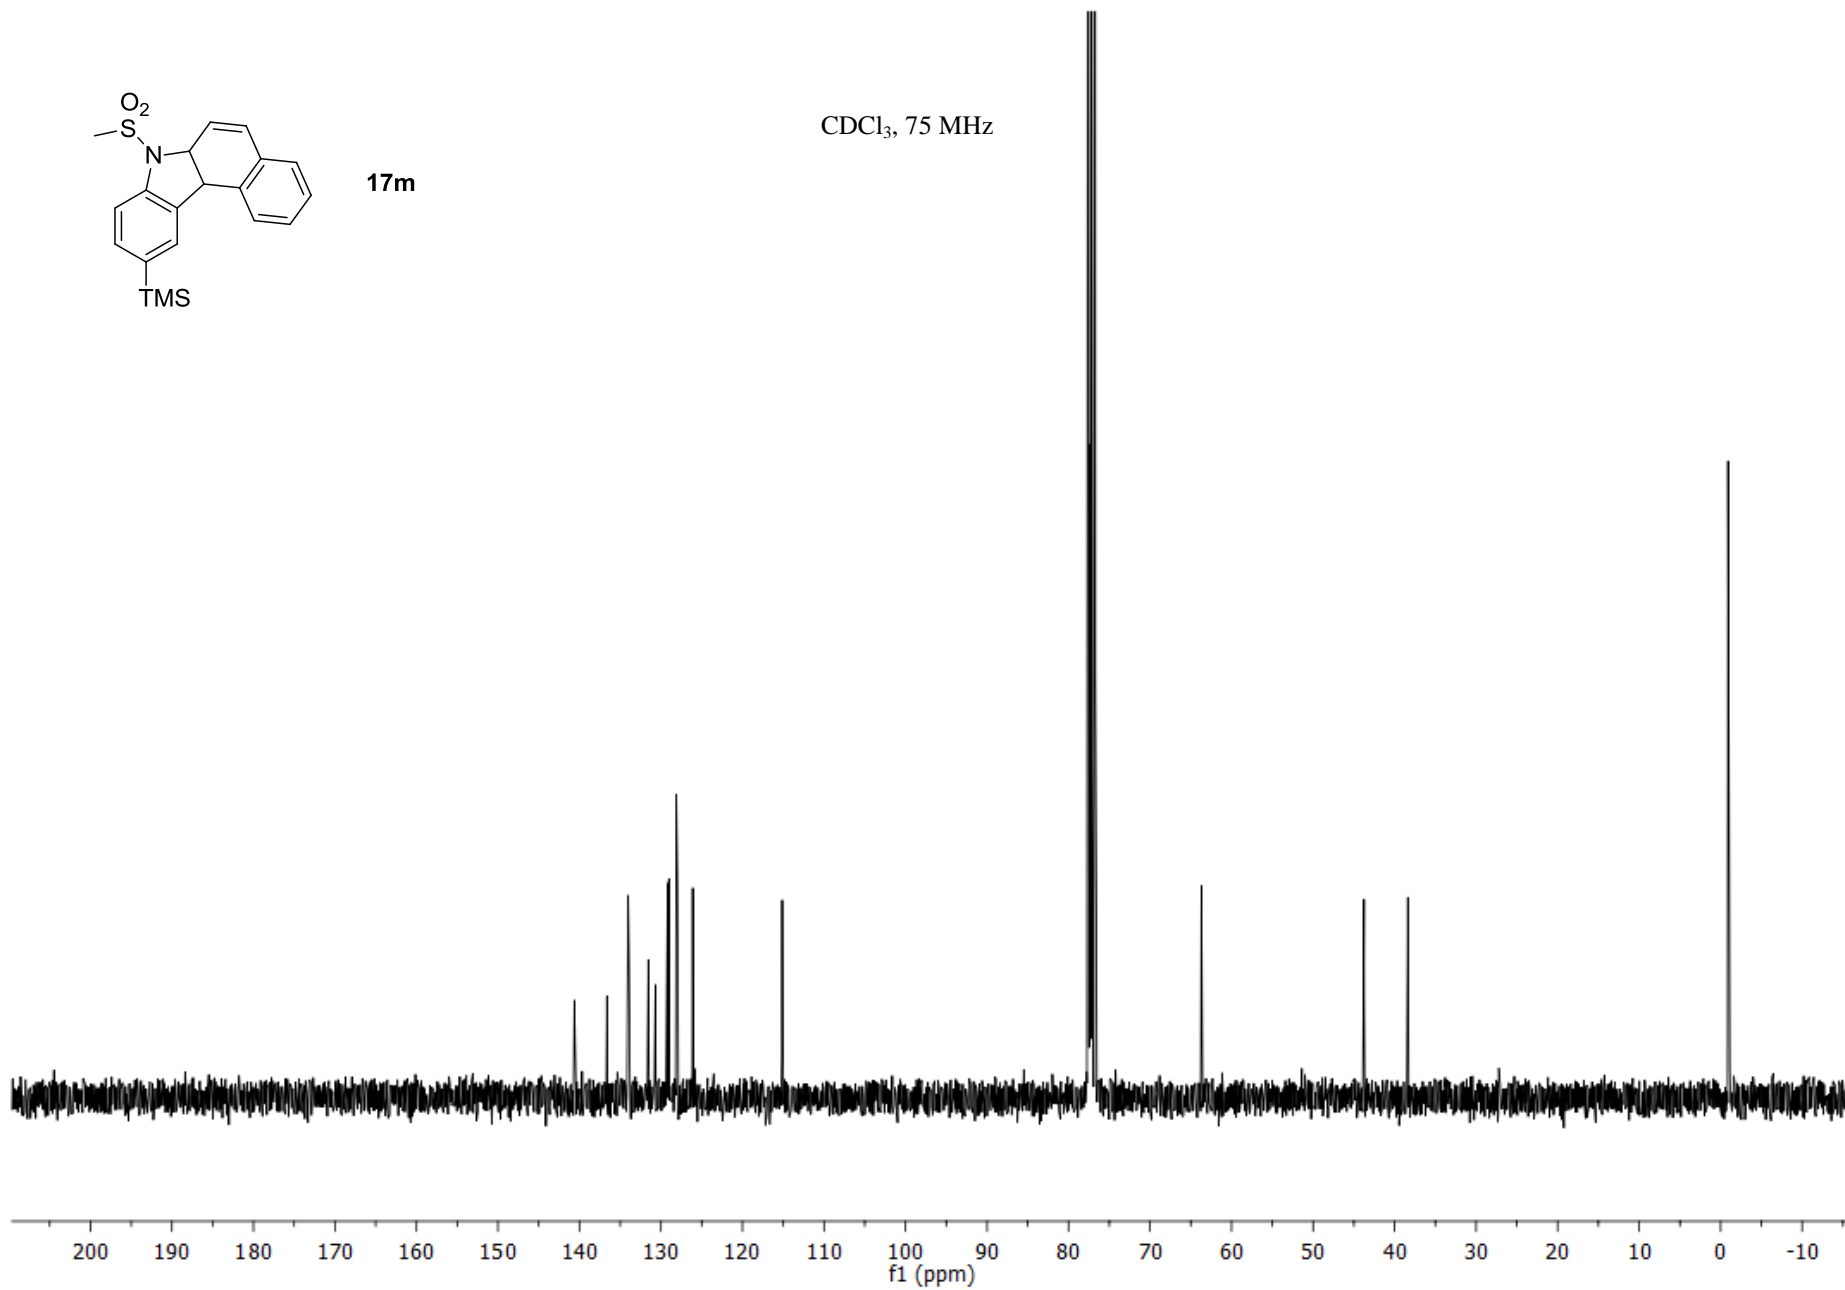

CDCl<sub>3</sub>, 300 MHz

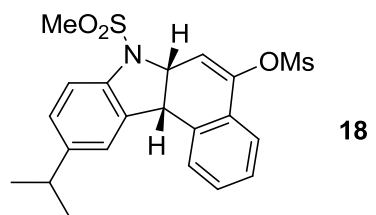

18

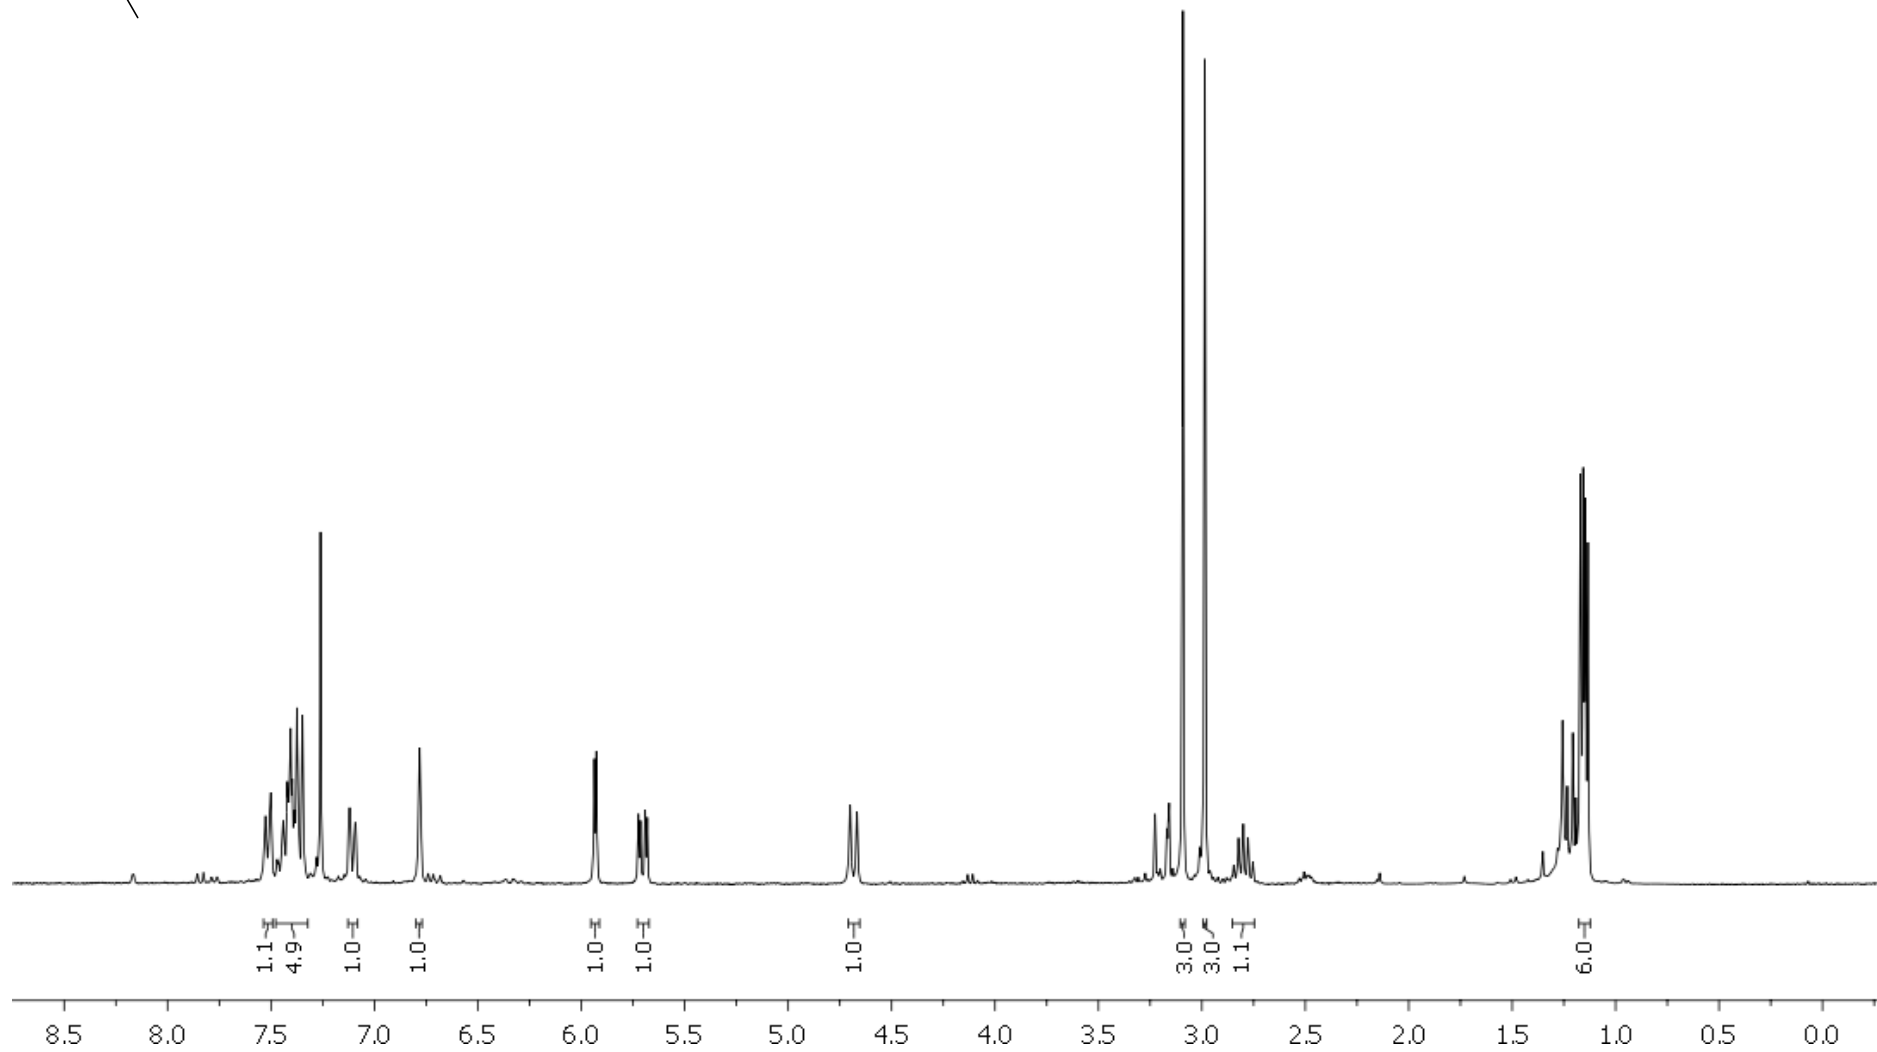

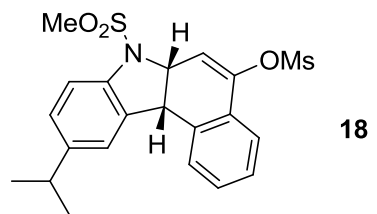

CDCl<sub>3</sub>, 75 MHz

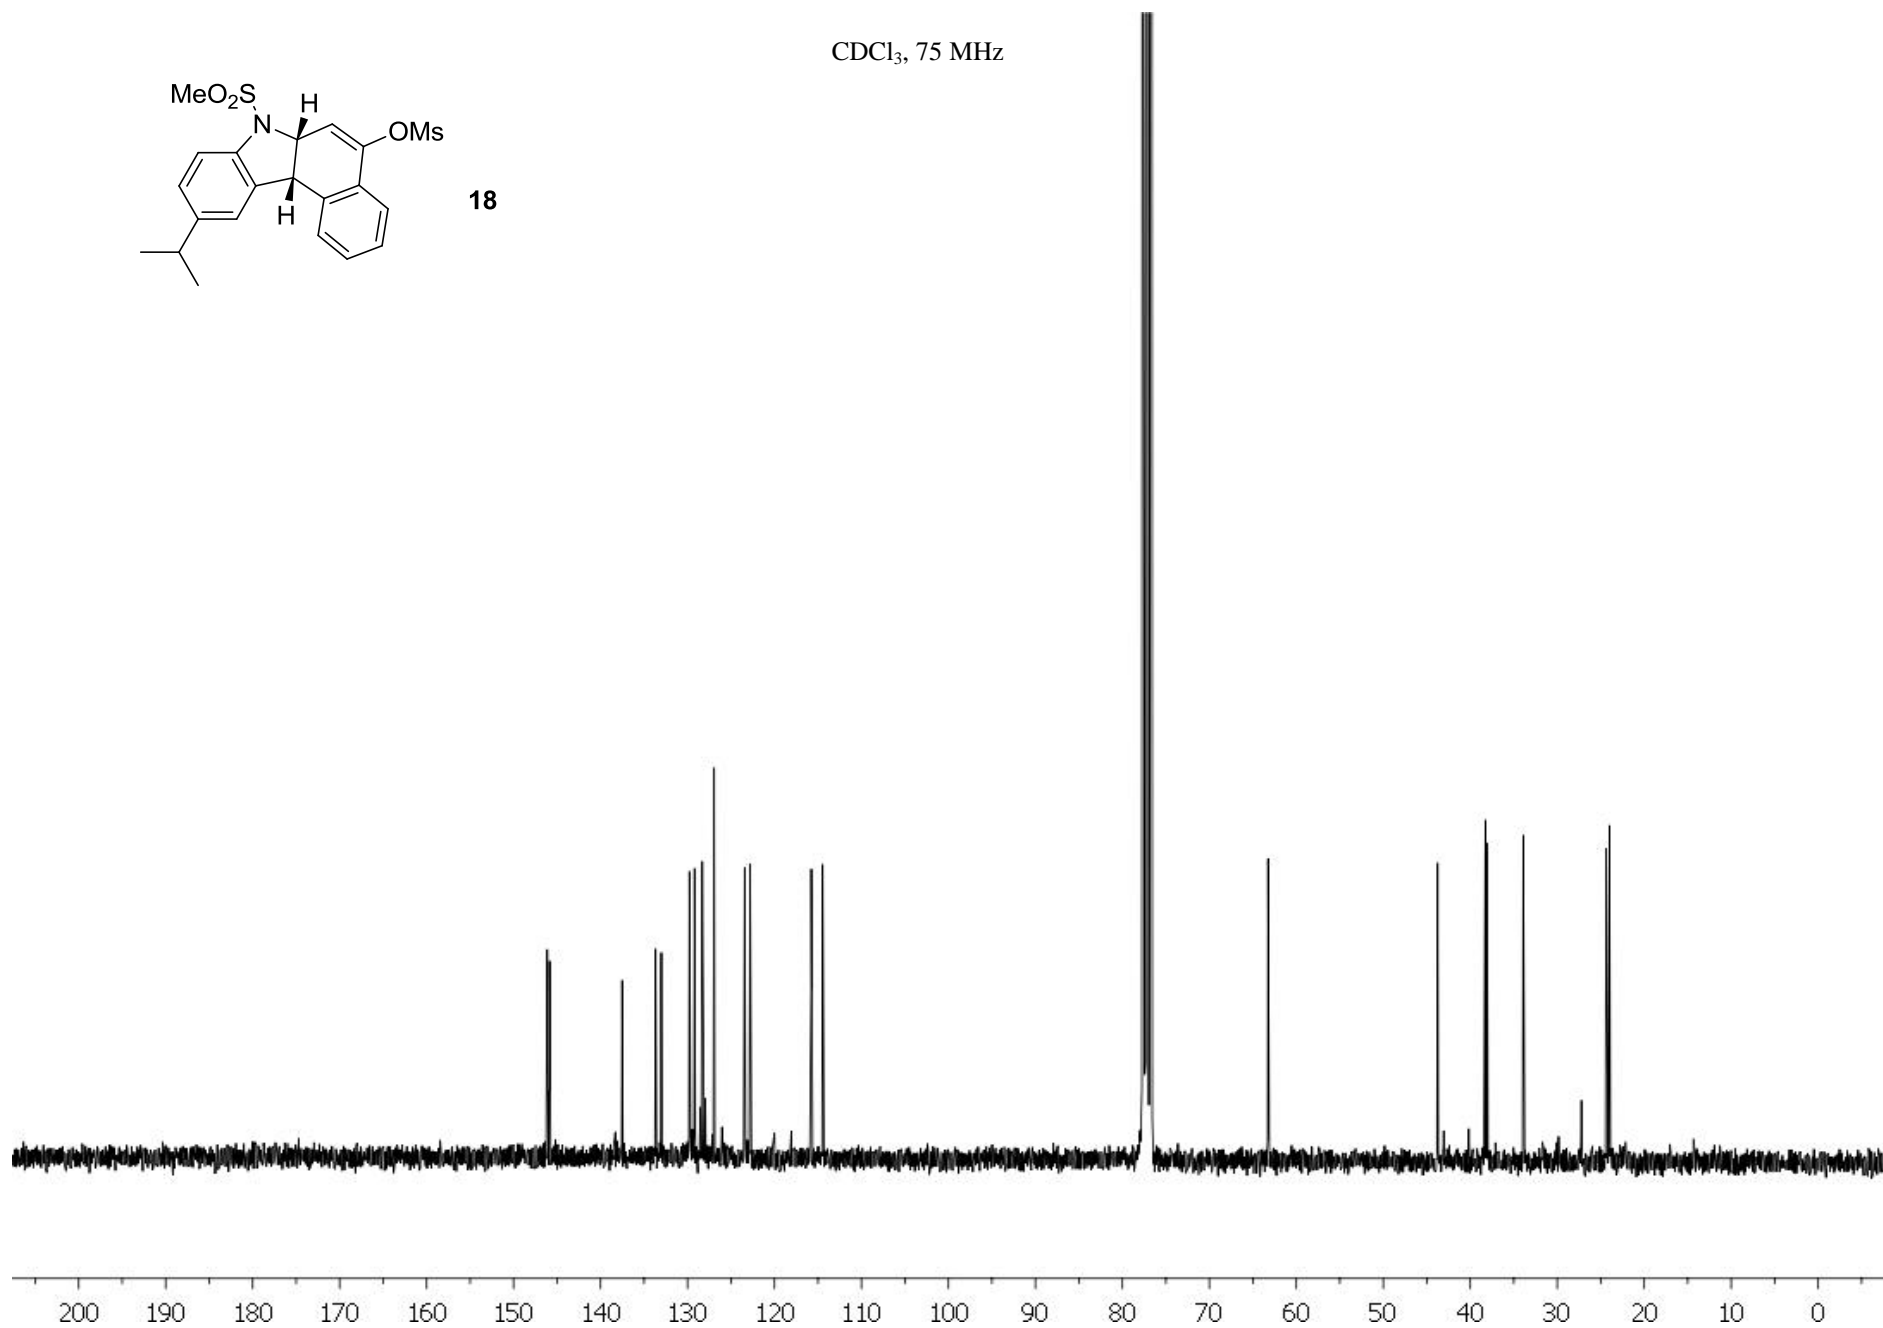

CDCl<sub>3</sub>, 300 MHz

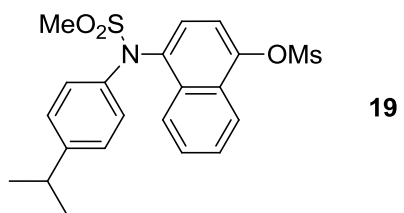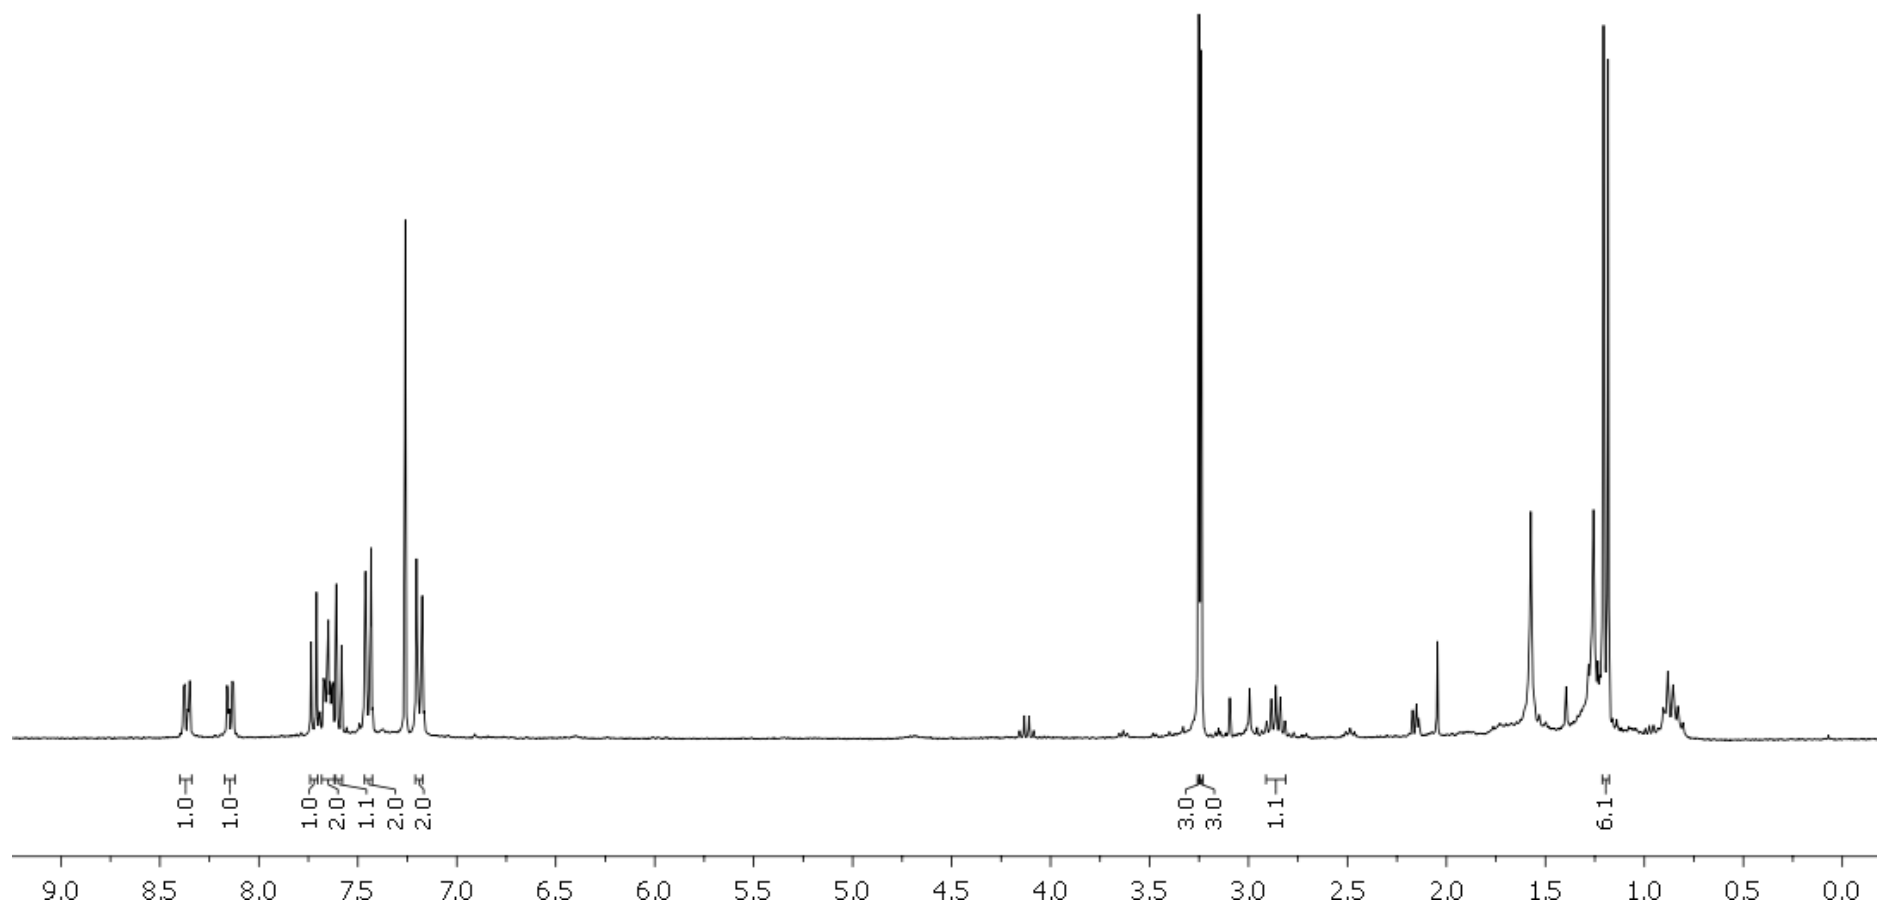

CDCl<sub>3</sub>, 75 MHz

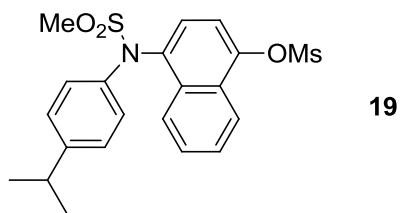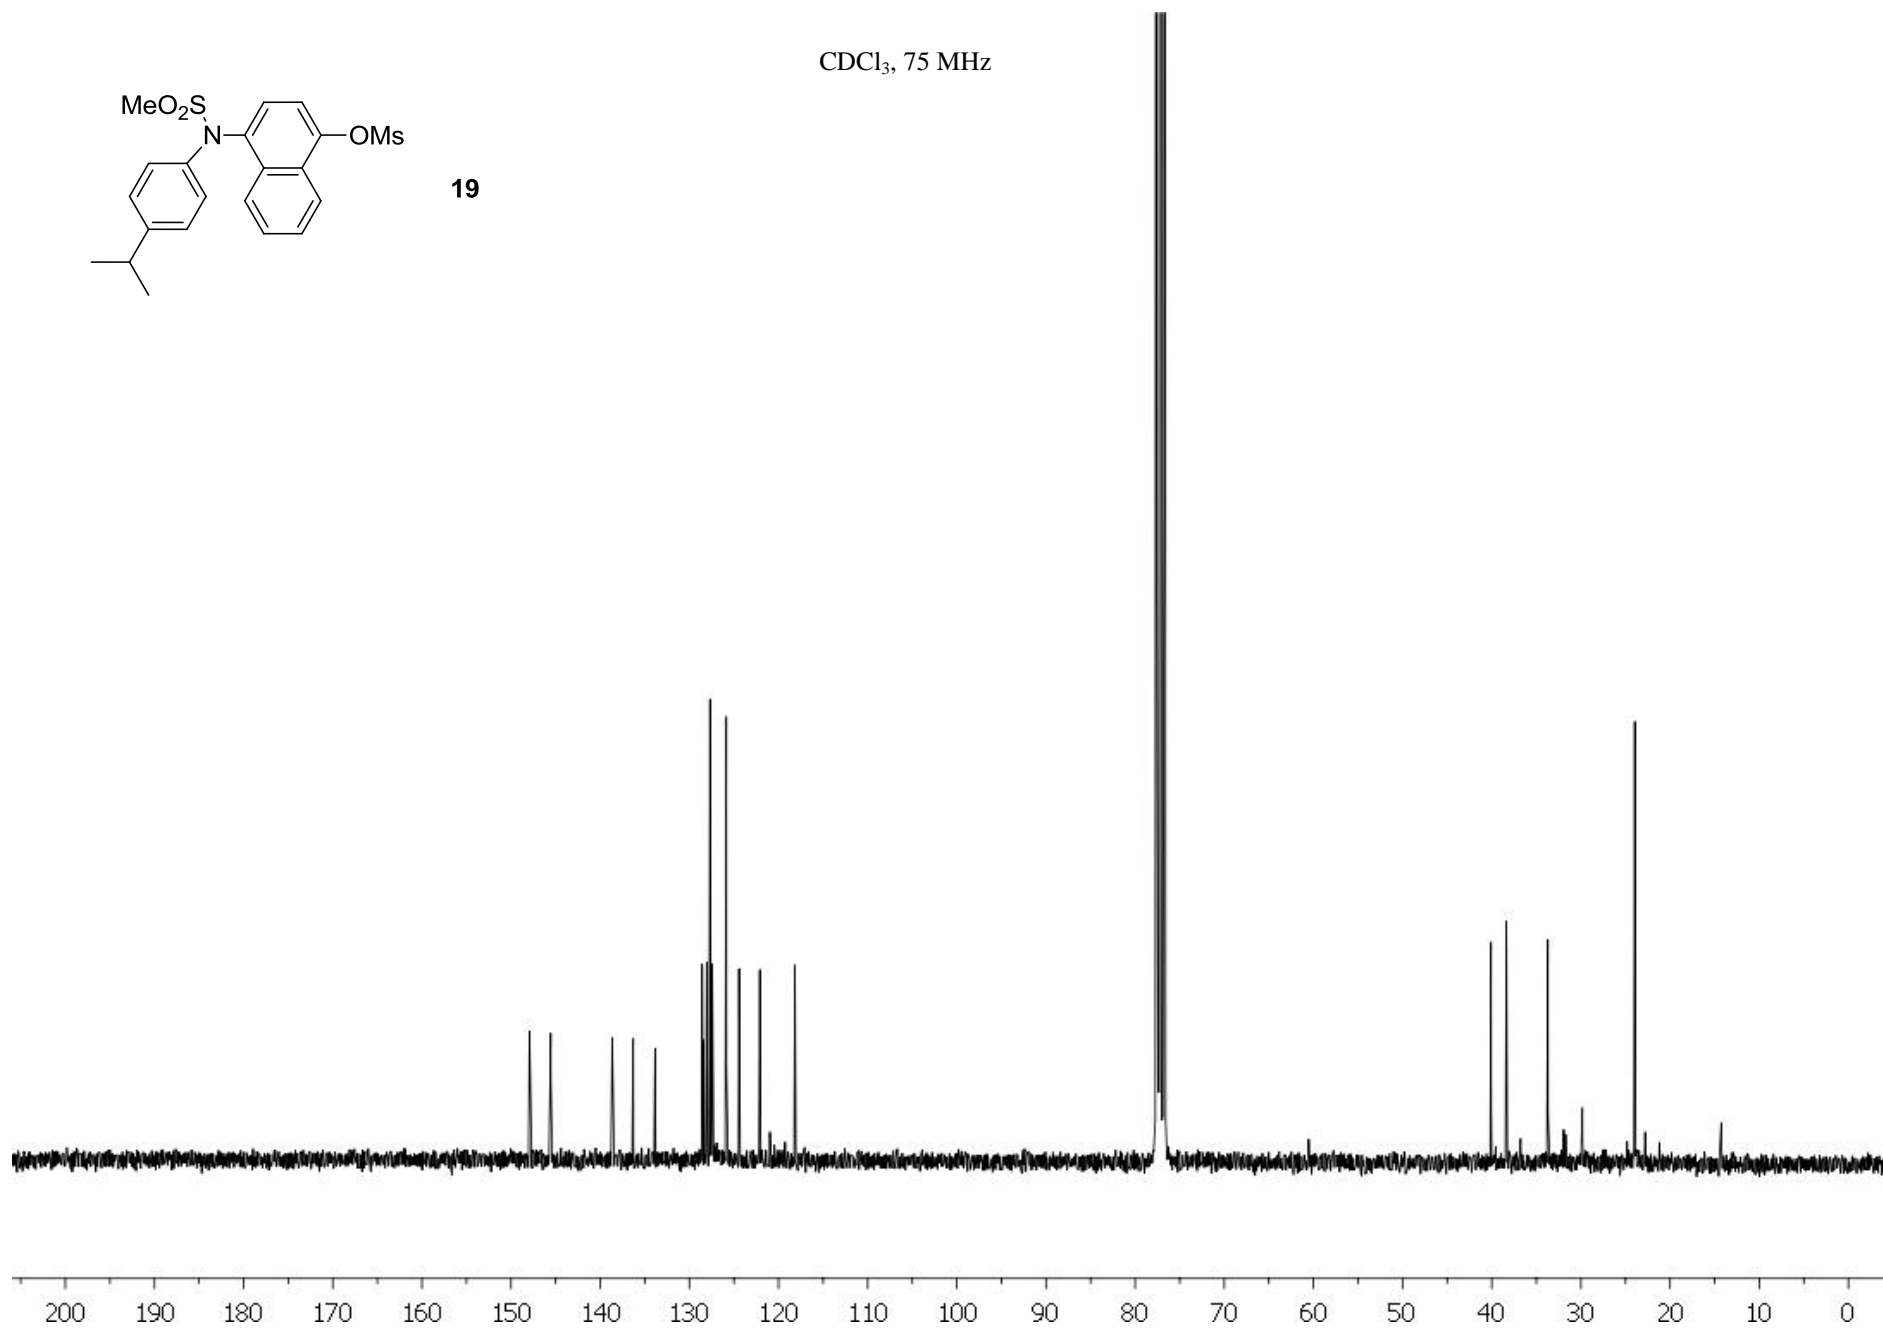

CDCl<sub>3</sub>, 300 MHz

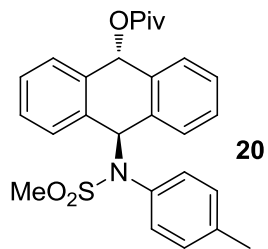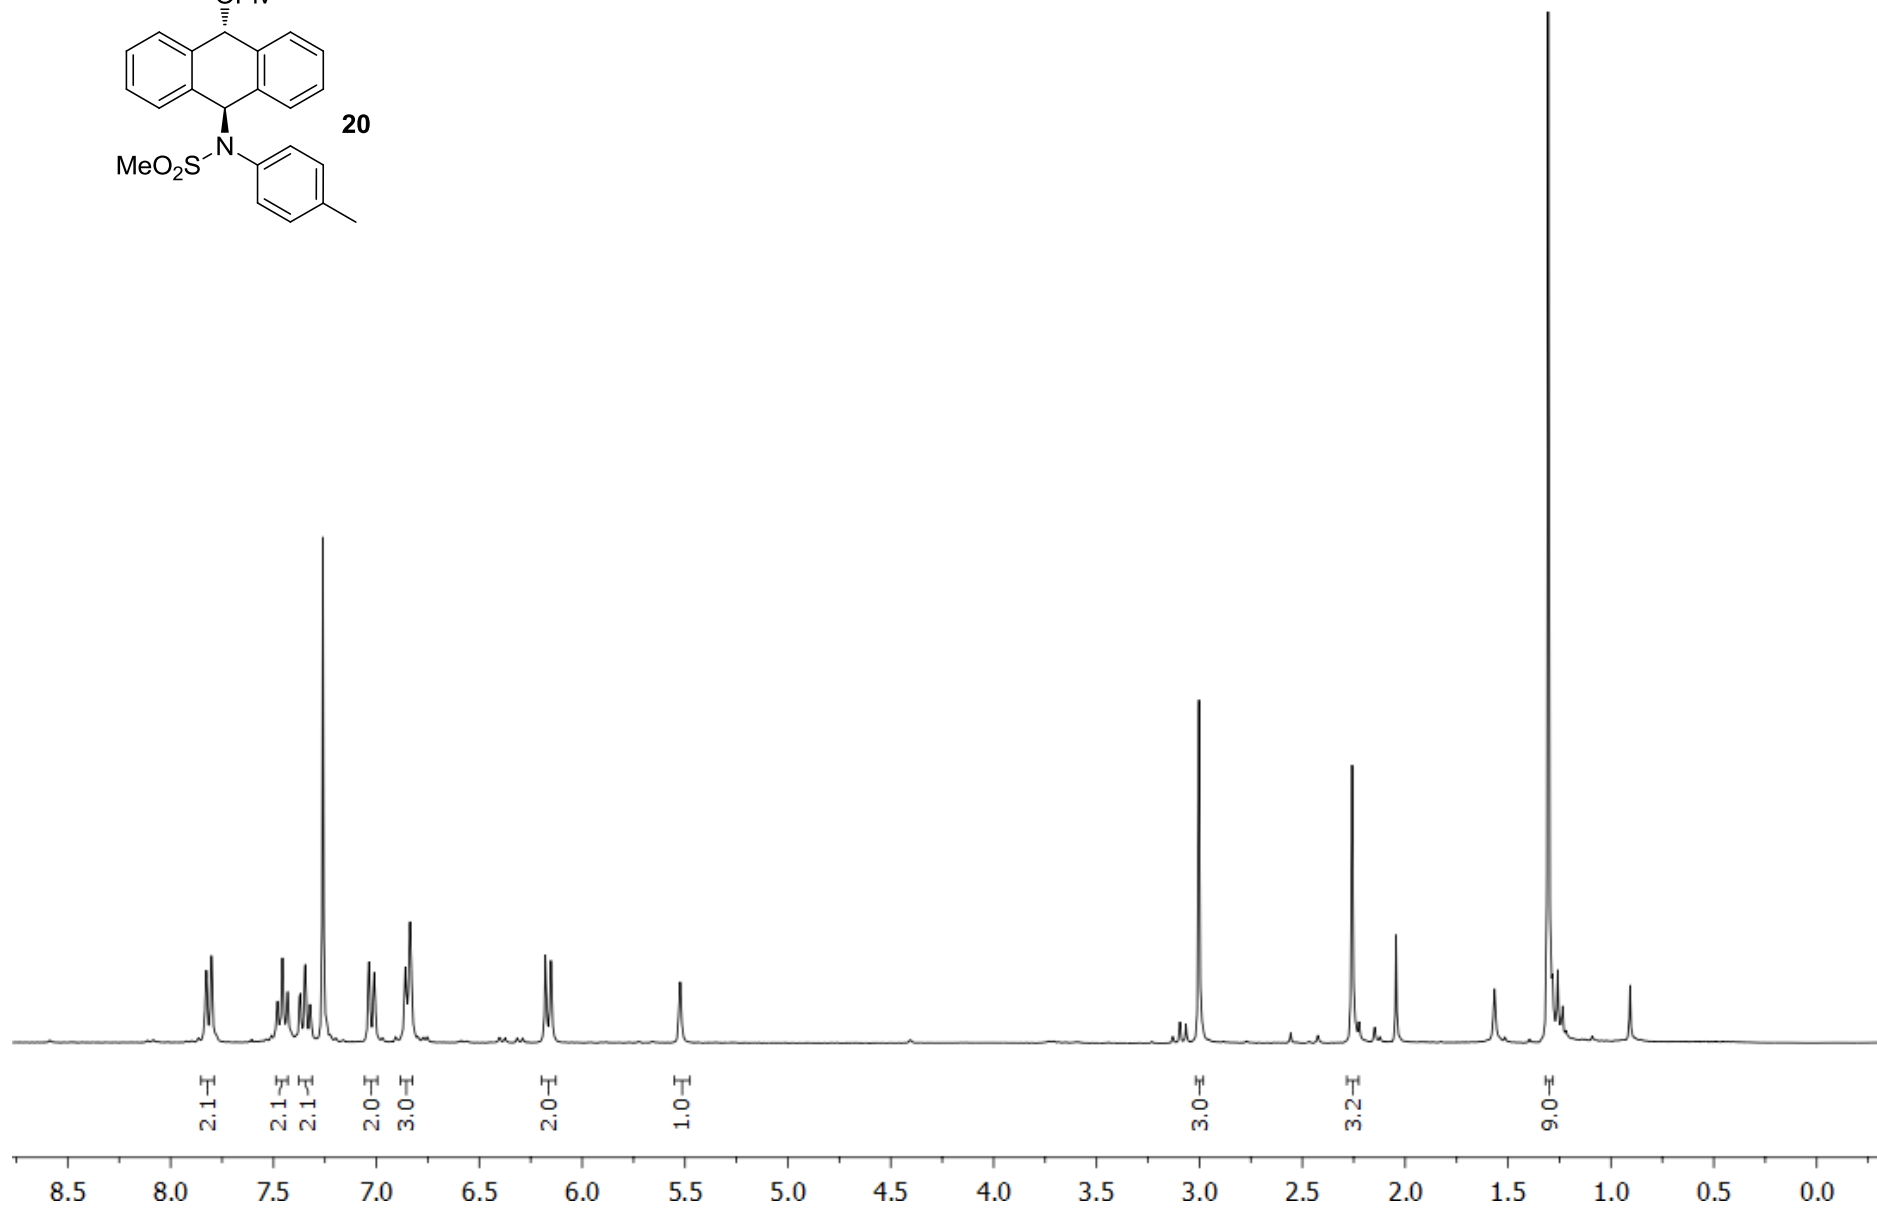

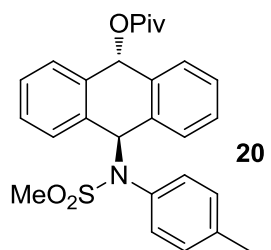

CDCl<sub>3</sub>, 75 MHz

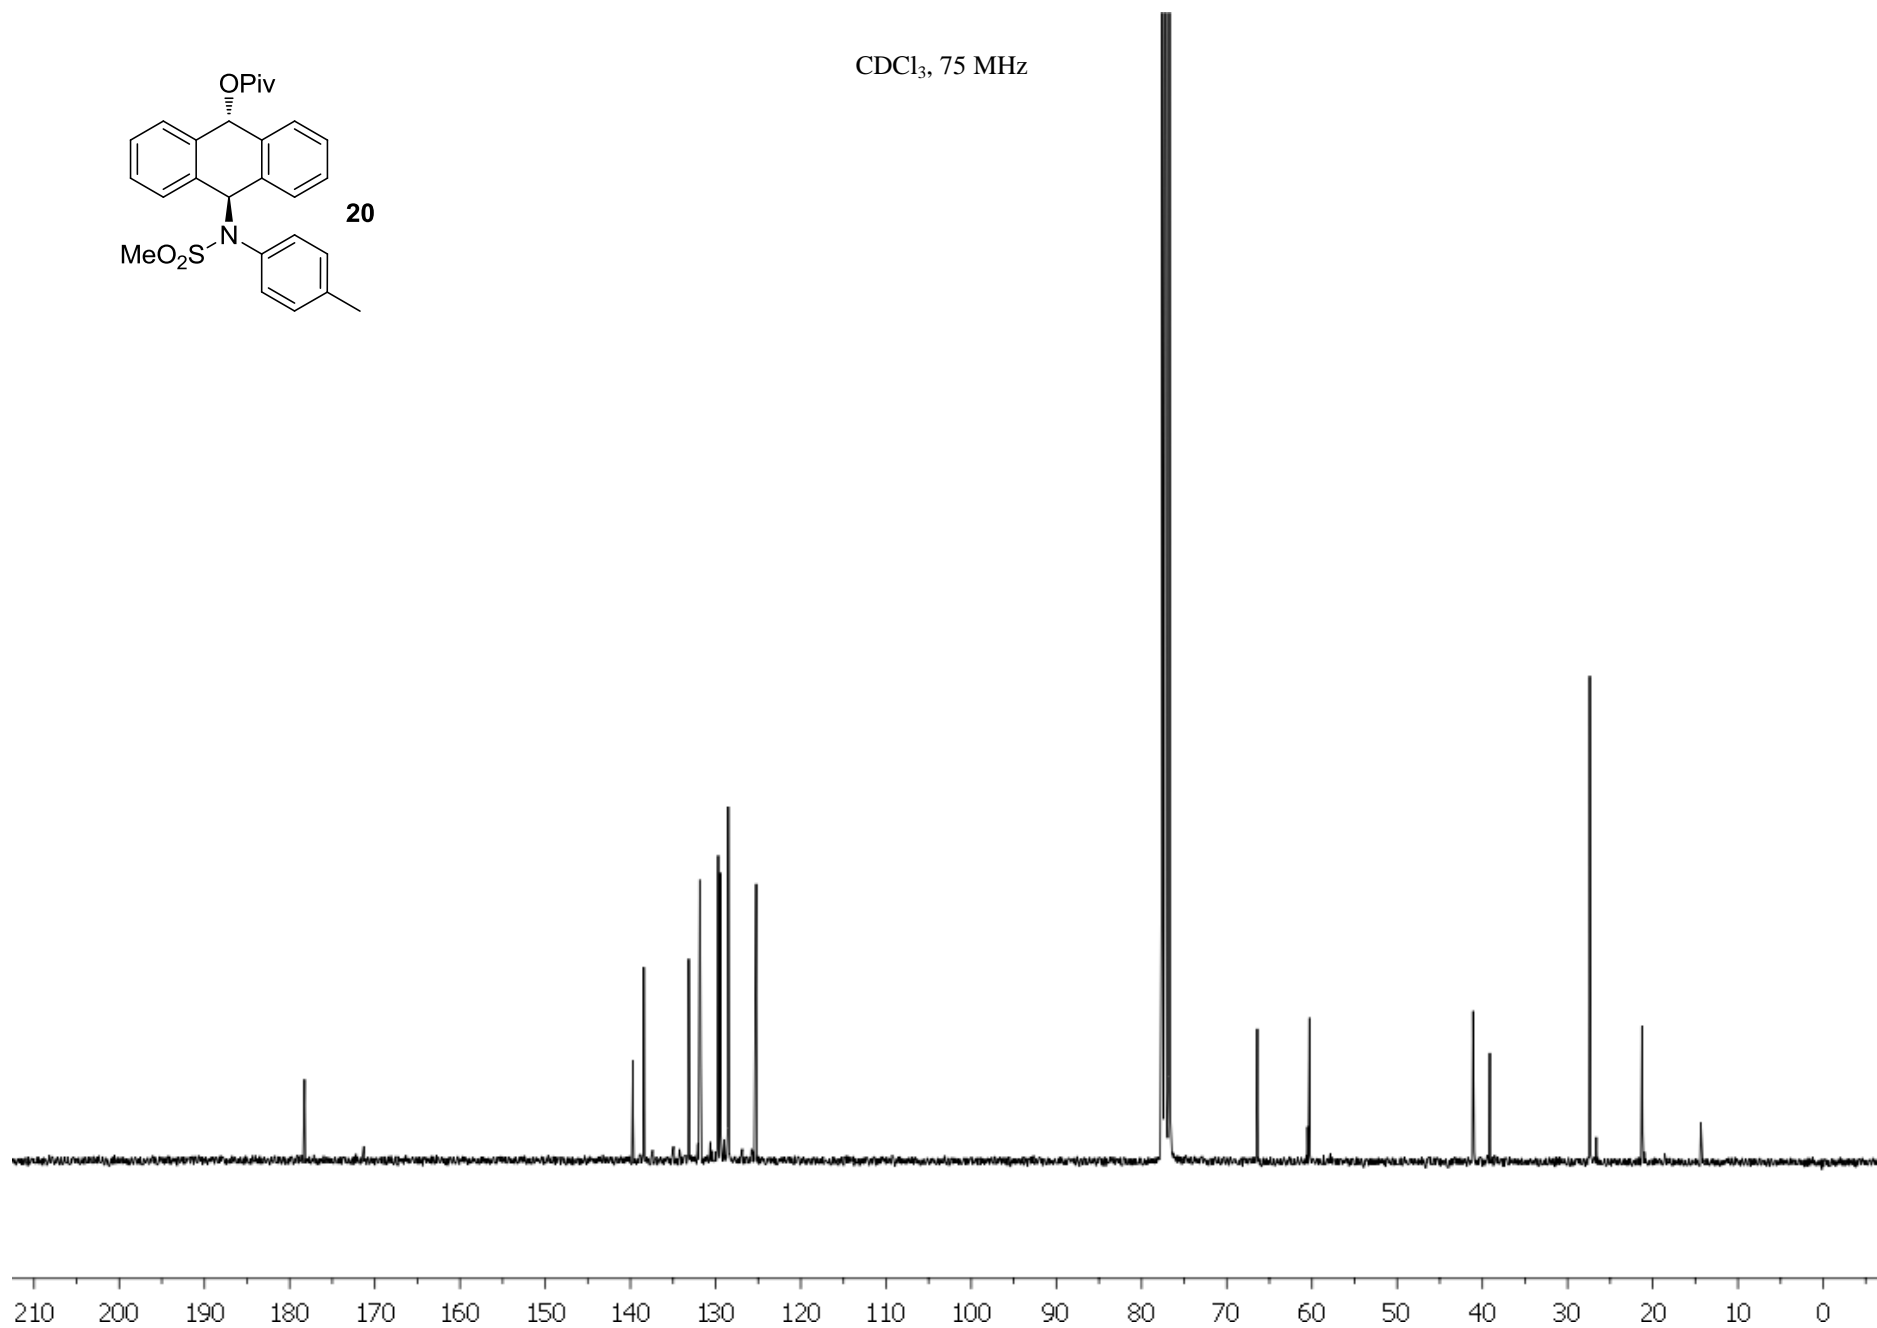

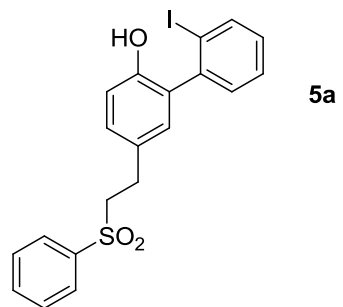

CDCl<sub>3</sub>, 300 MHz

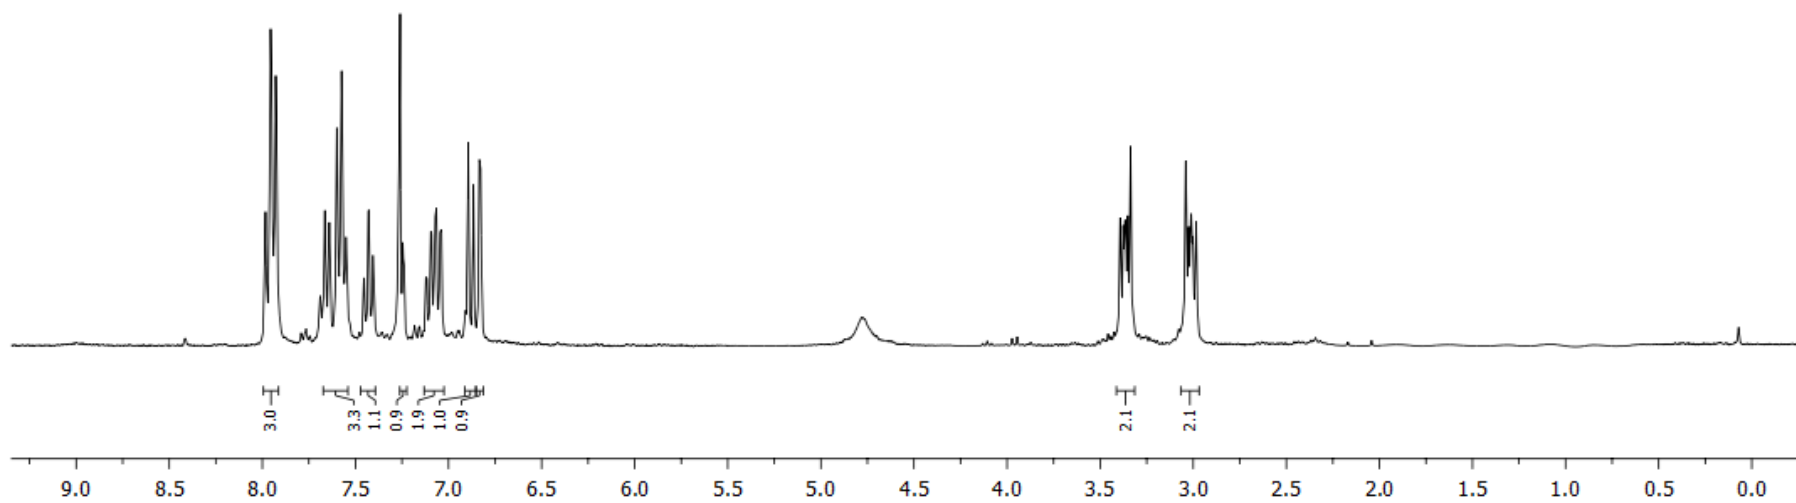



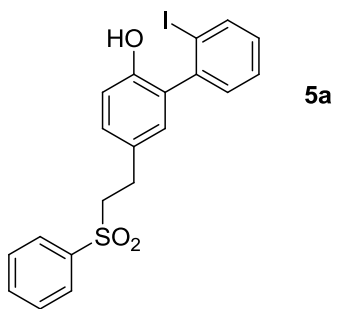

CDCl<sub>3</sub>, 75 MHz

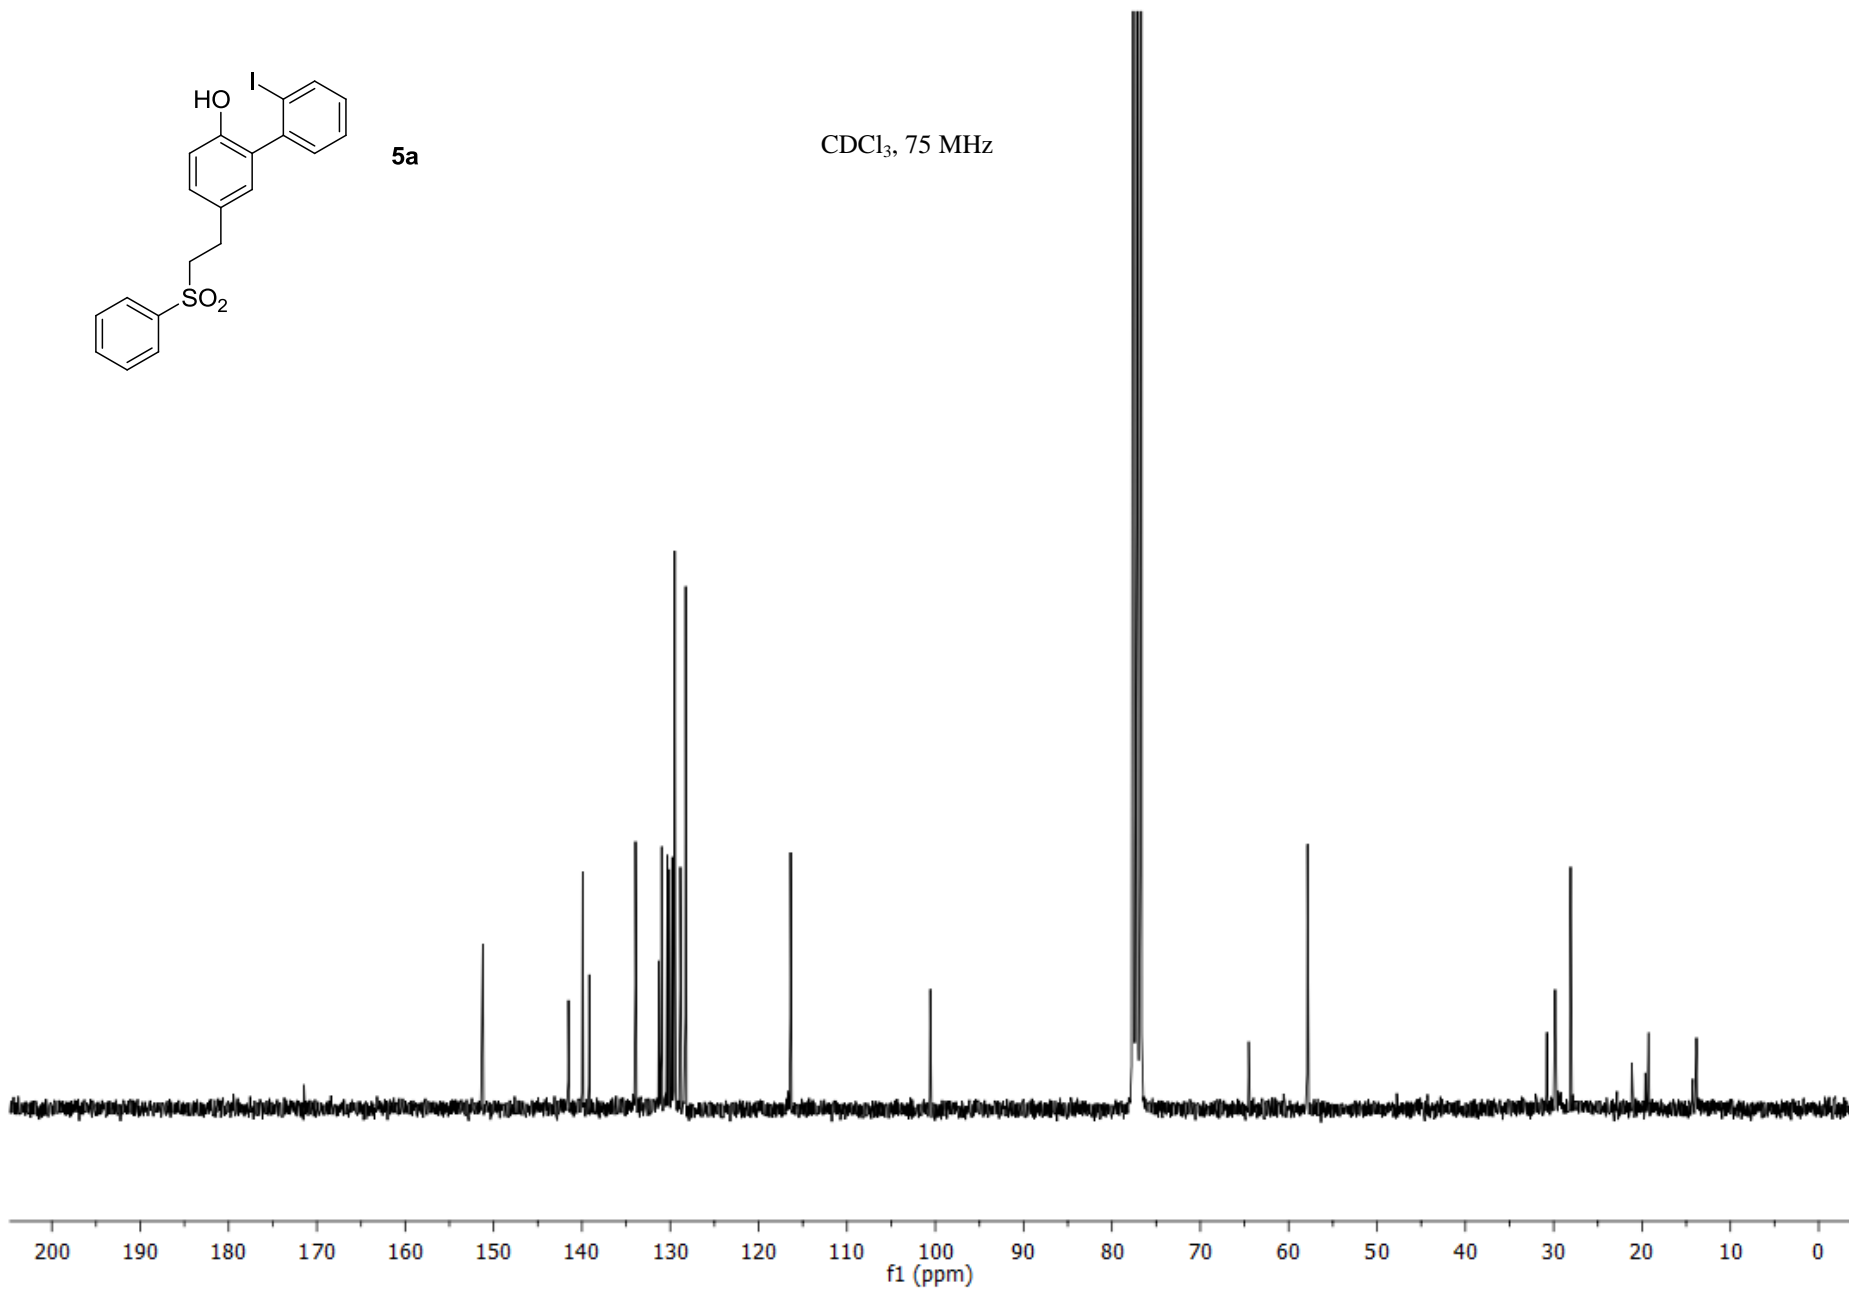

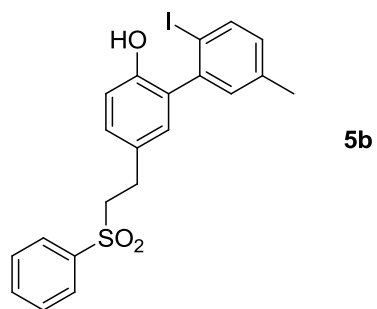

CDCl<sub>3</sub>, 300 MHz

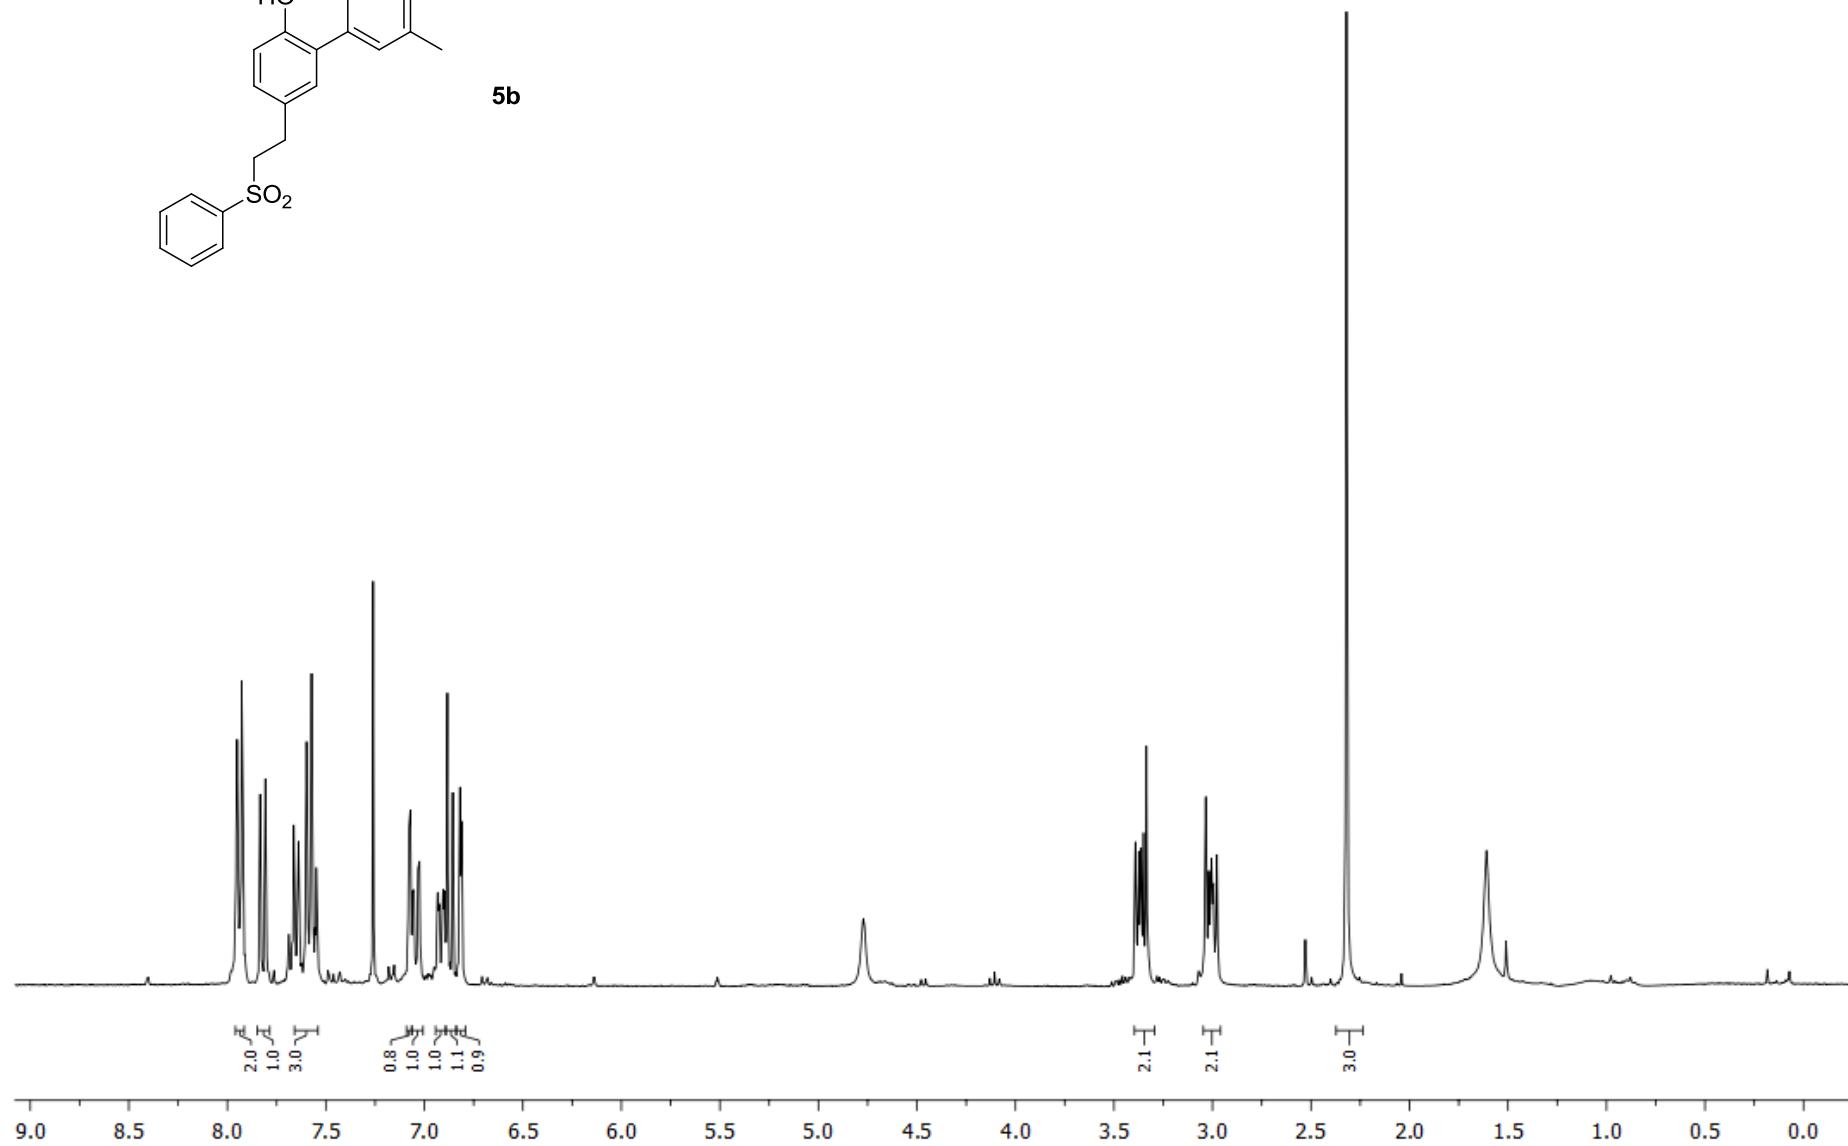

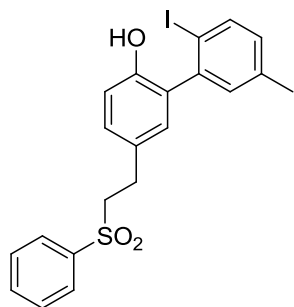

**5b**

CDCl<sub>3</sub>, 75 MHz

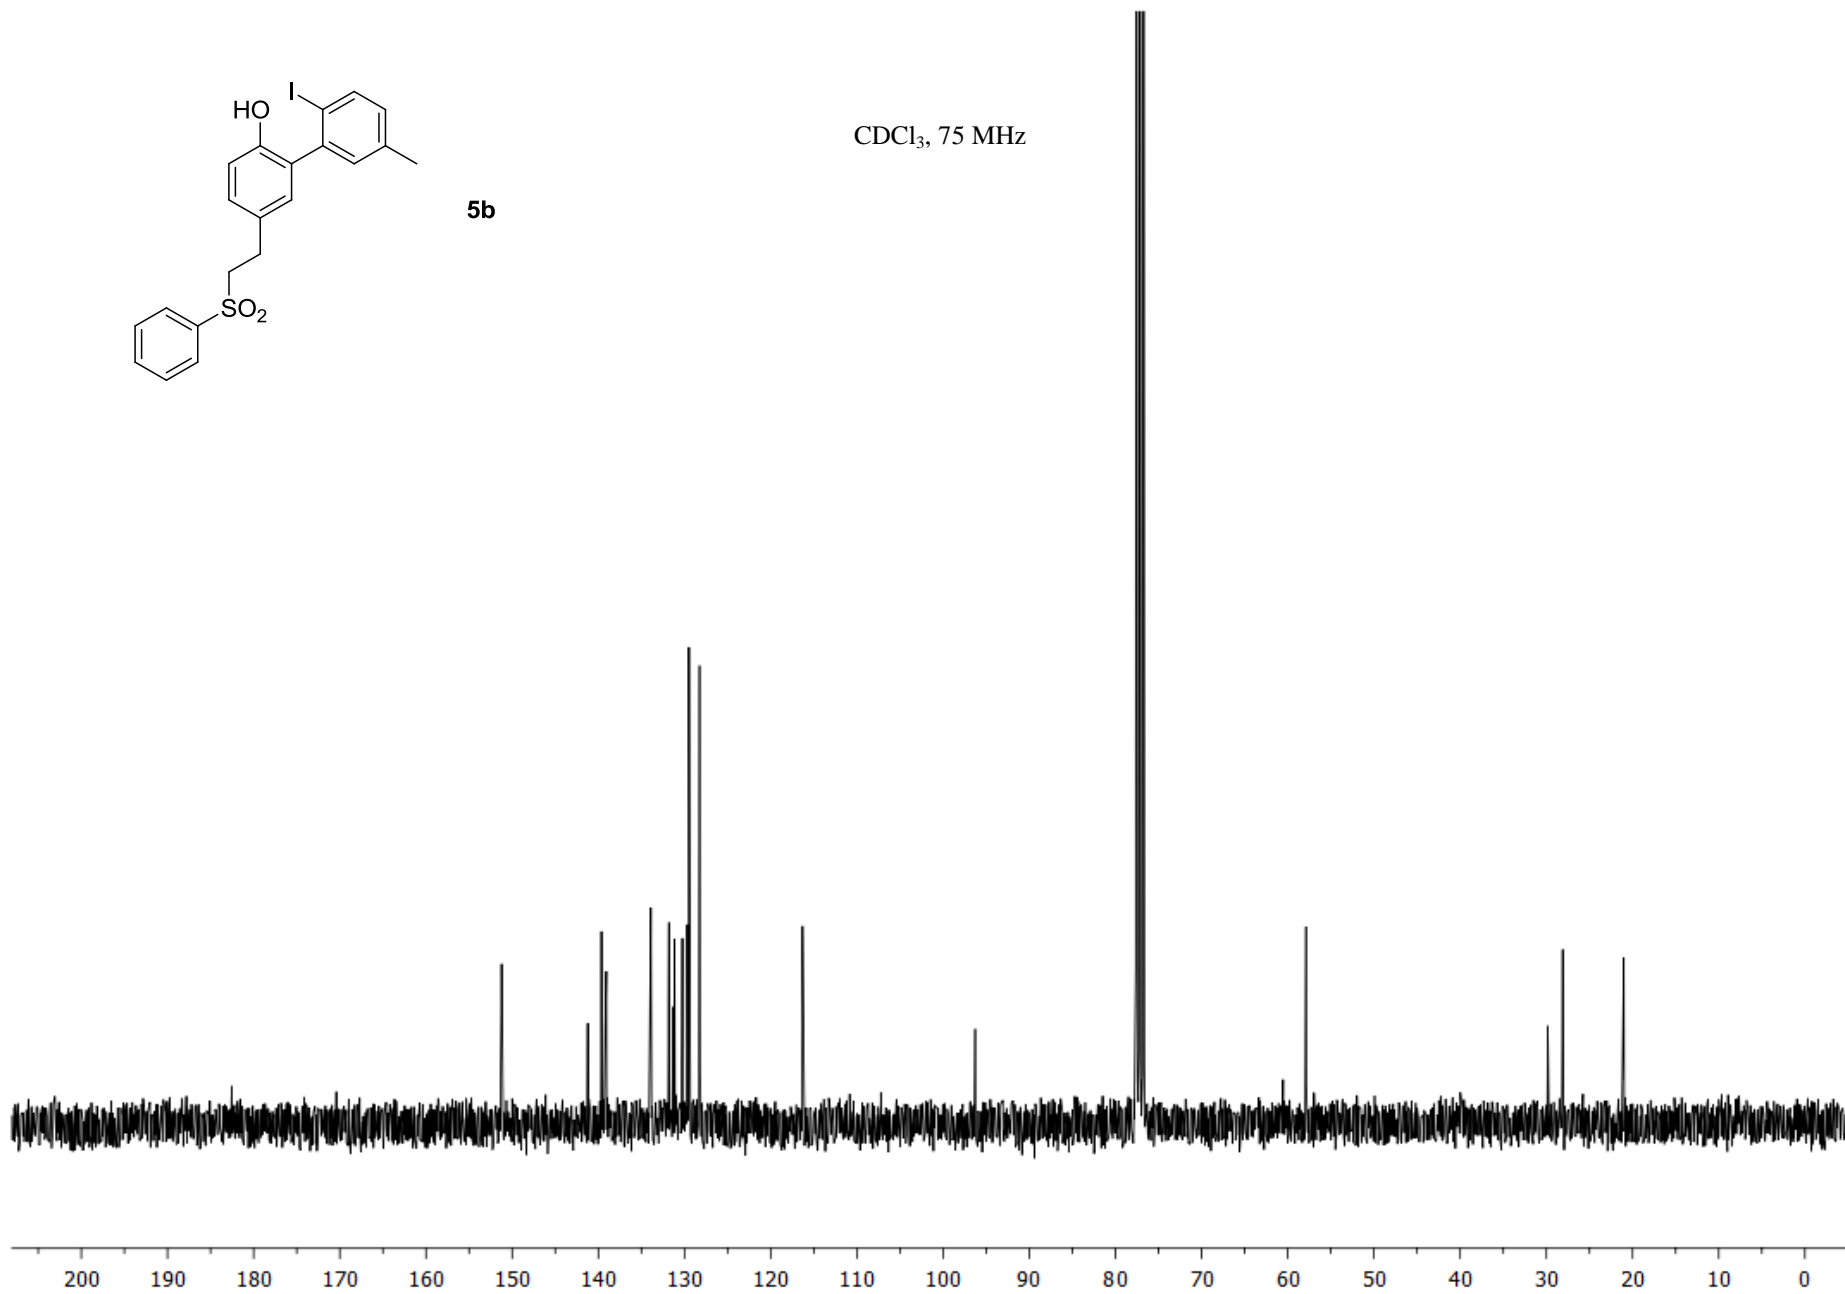

CDCl<sub>3</sub>, 300 MHz

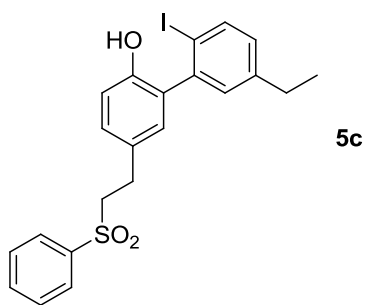

**5c**

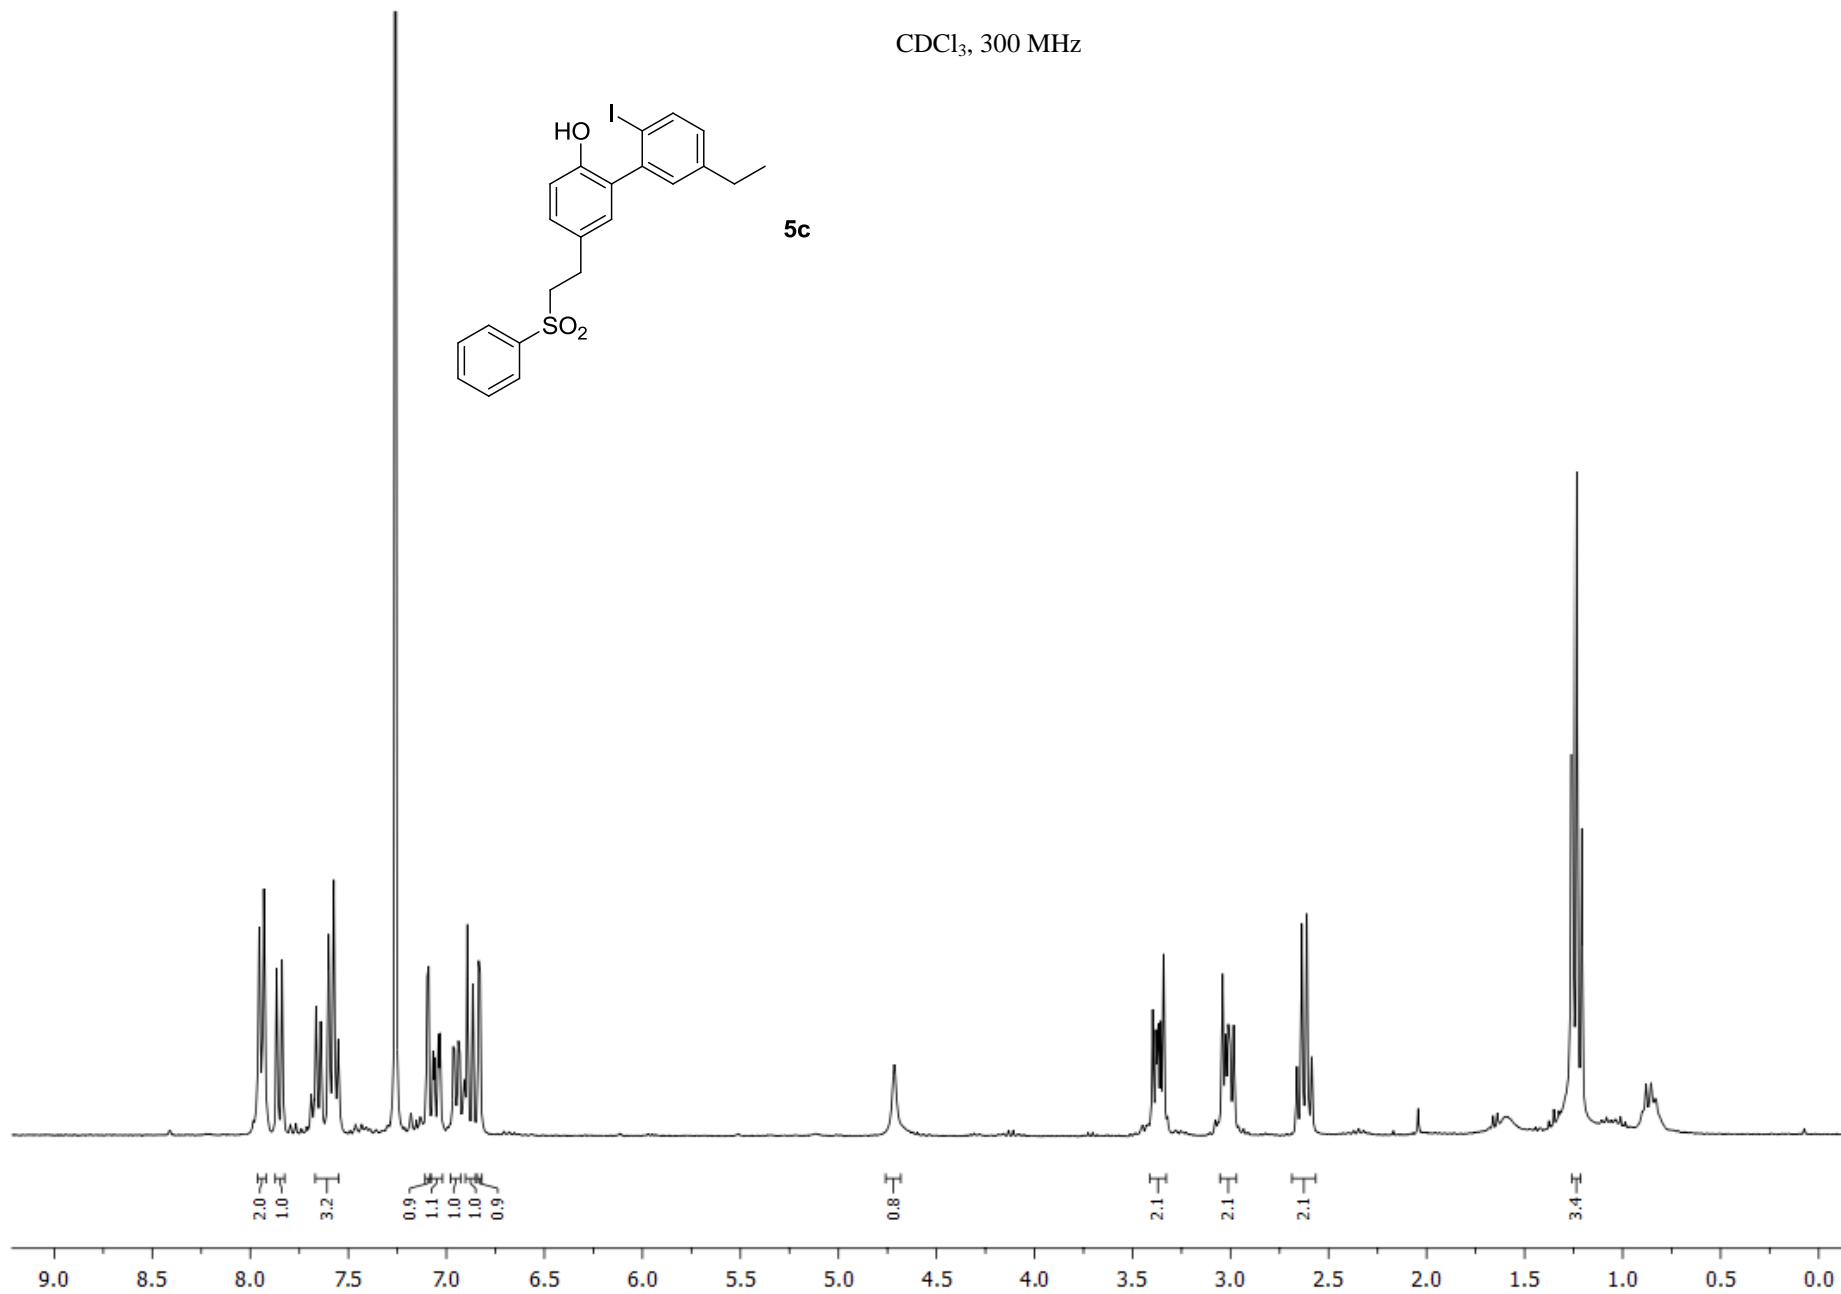

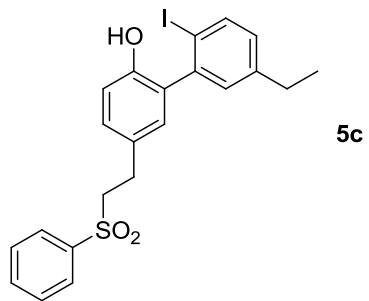

CDCl<sub>3</sub>, 75 MHz

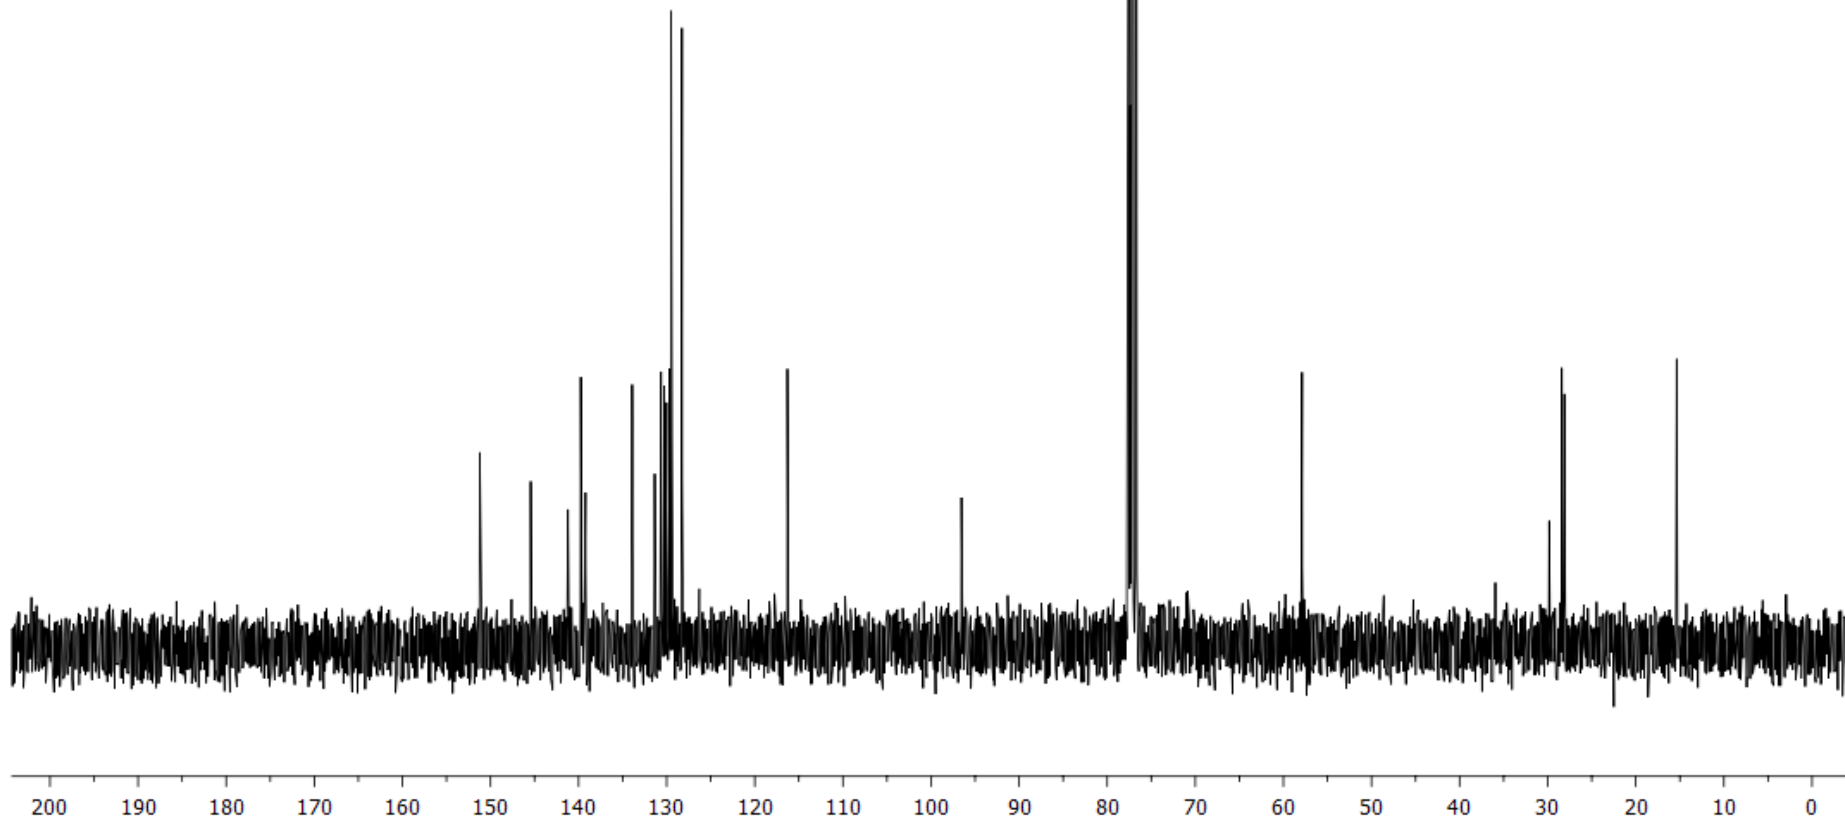

CDCl<sub>3</sub>, 300 MHz

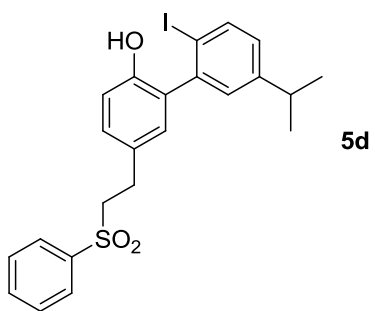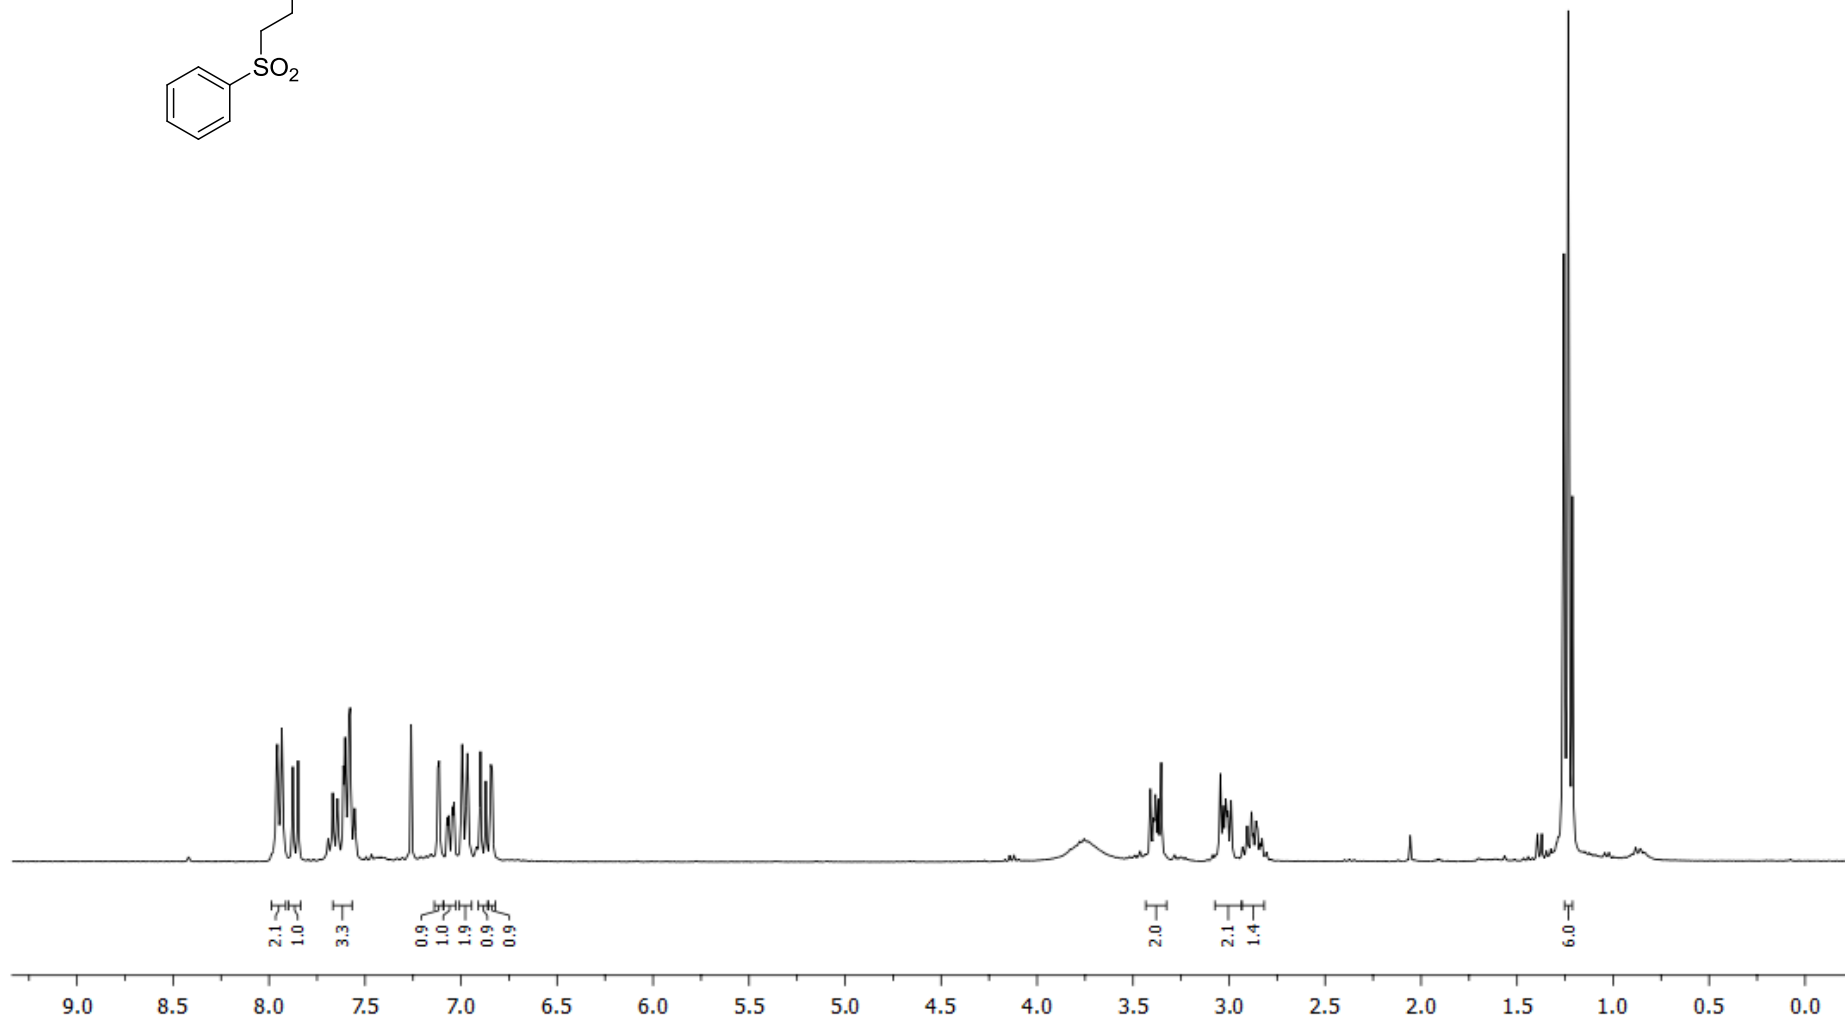

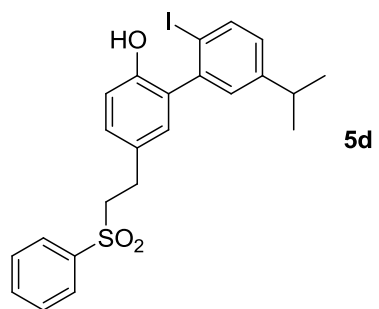

CDCl<sub>3</sub>, 75 MHz

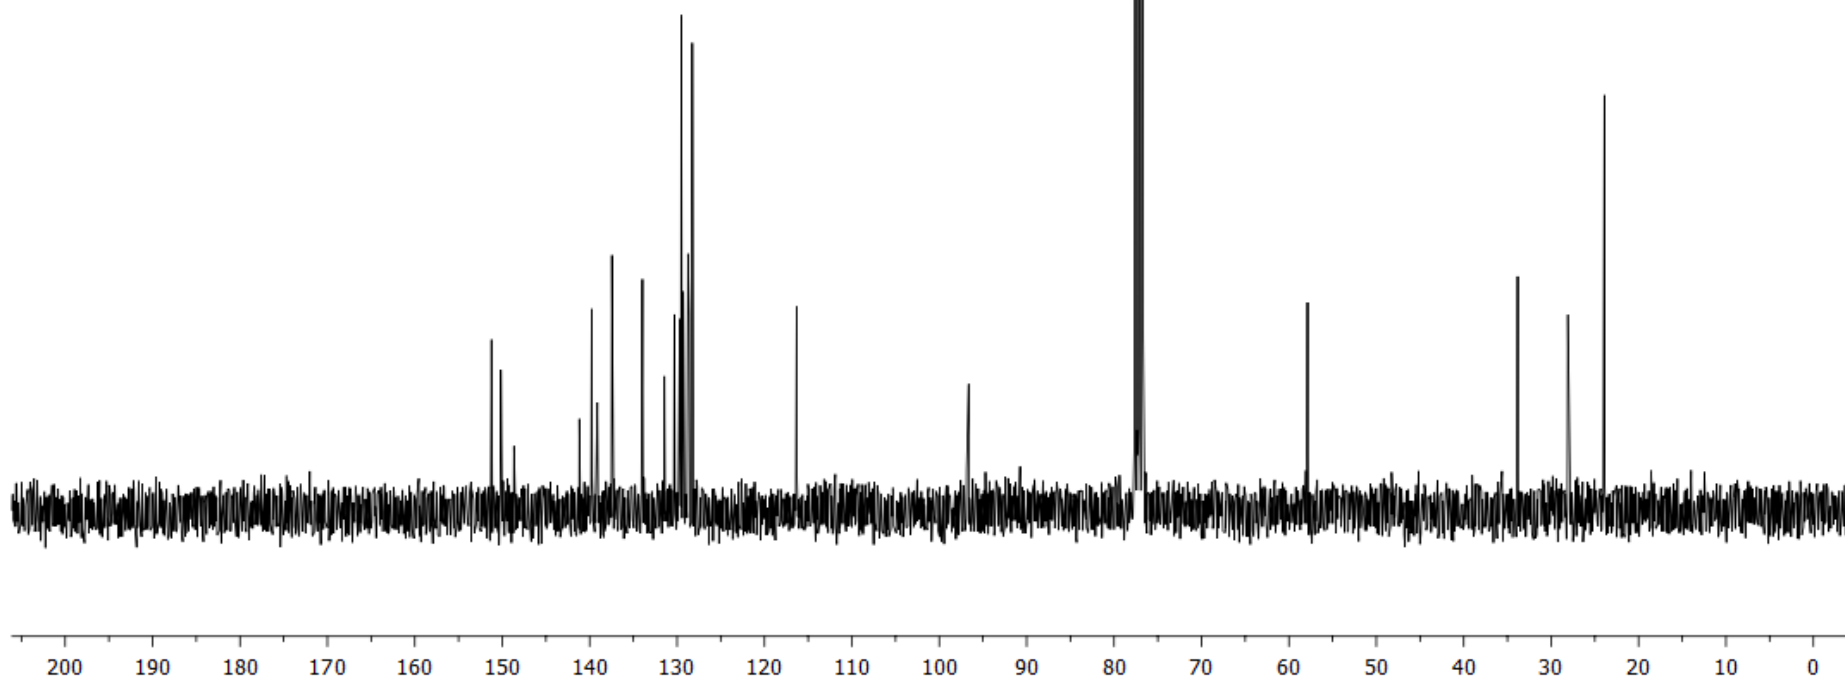

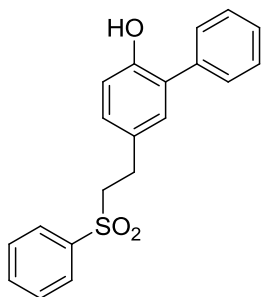

**5e**

CDCl<sub>3</sub>, 300 MHz

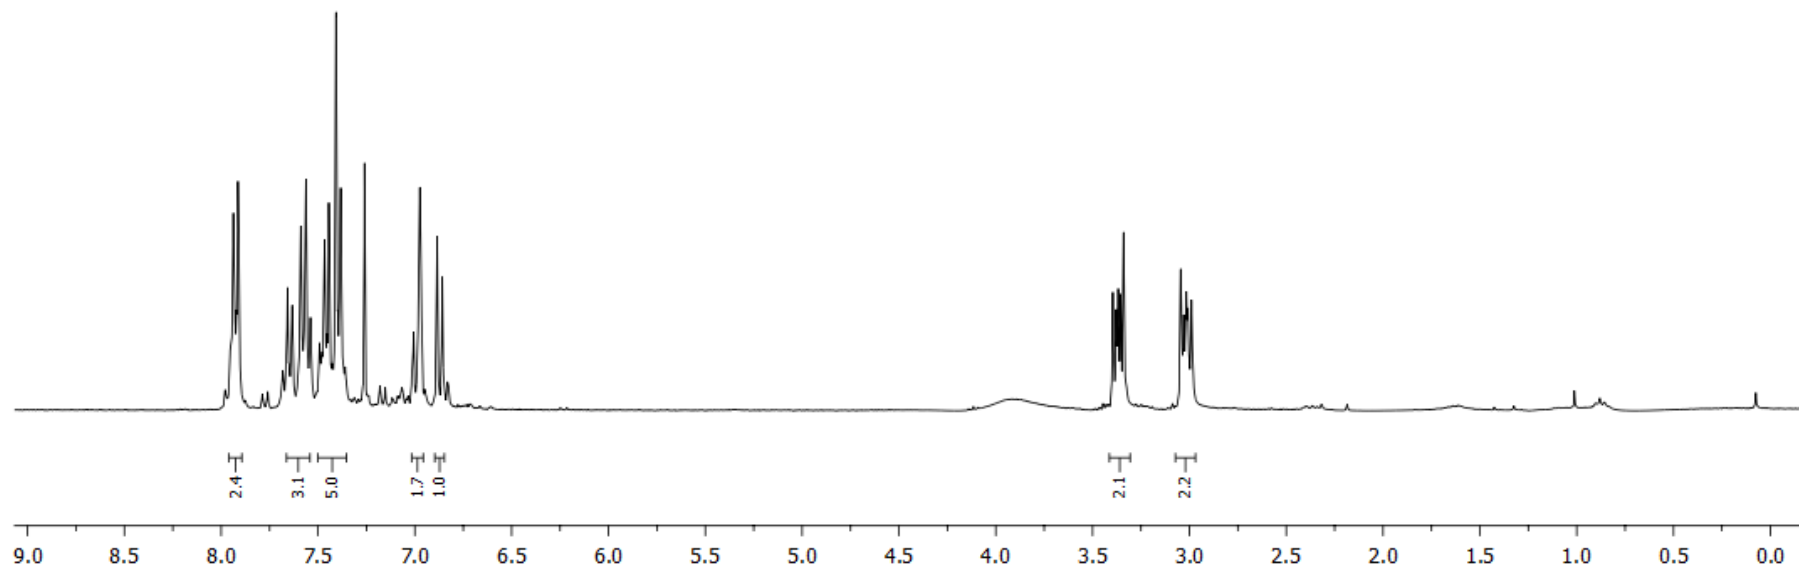



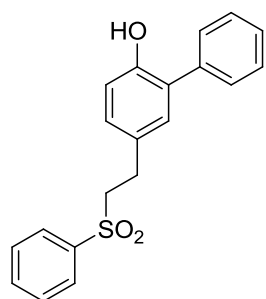

5e

CDCl<sub>3</sub>, 75 MHz

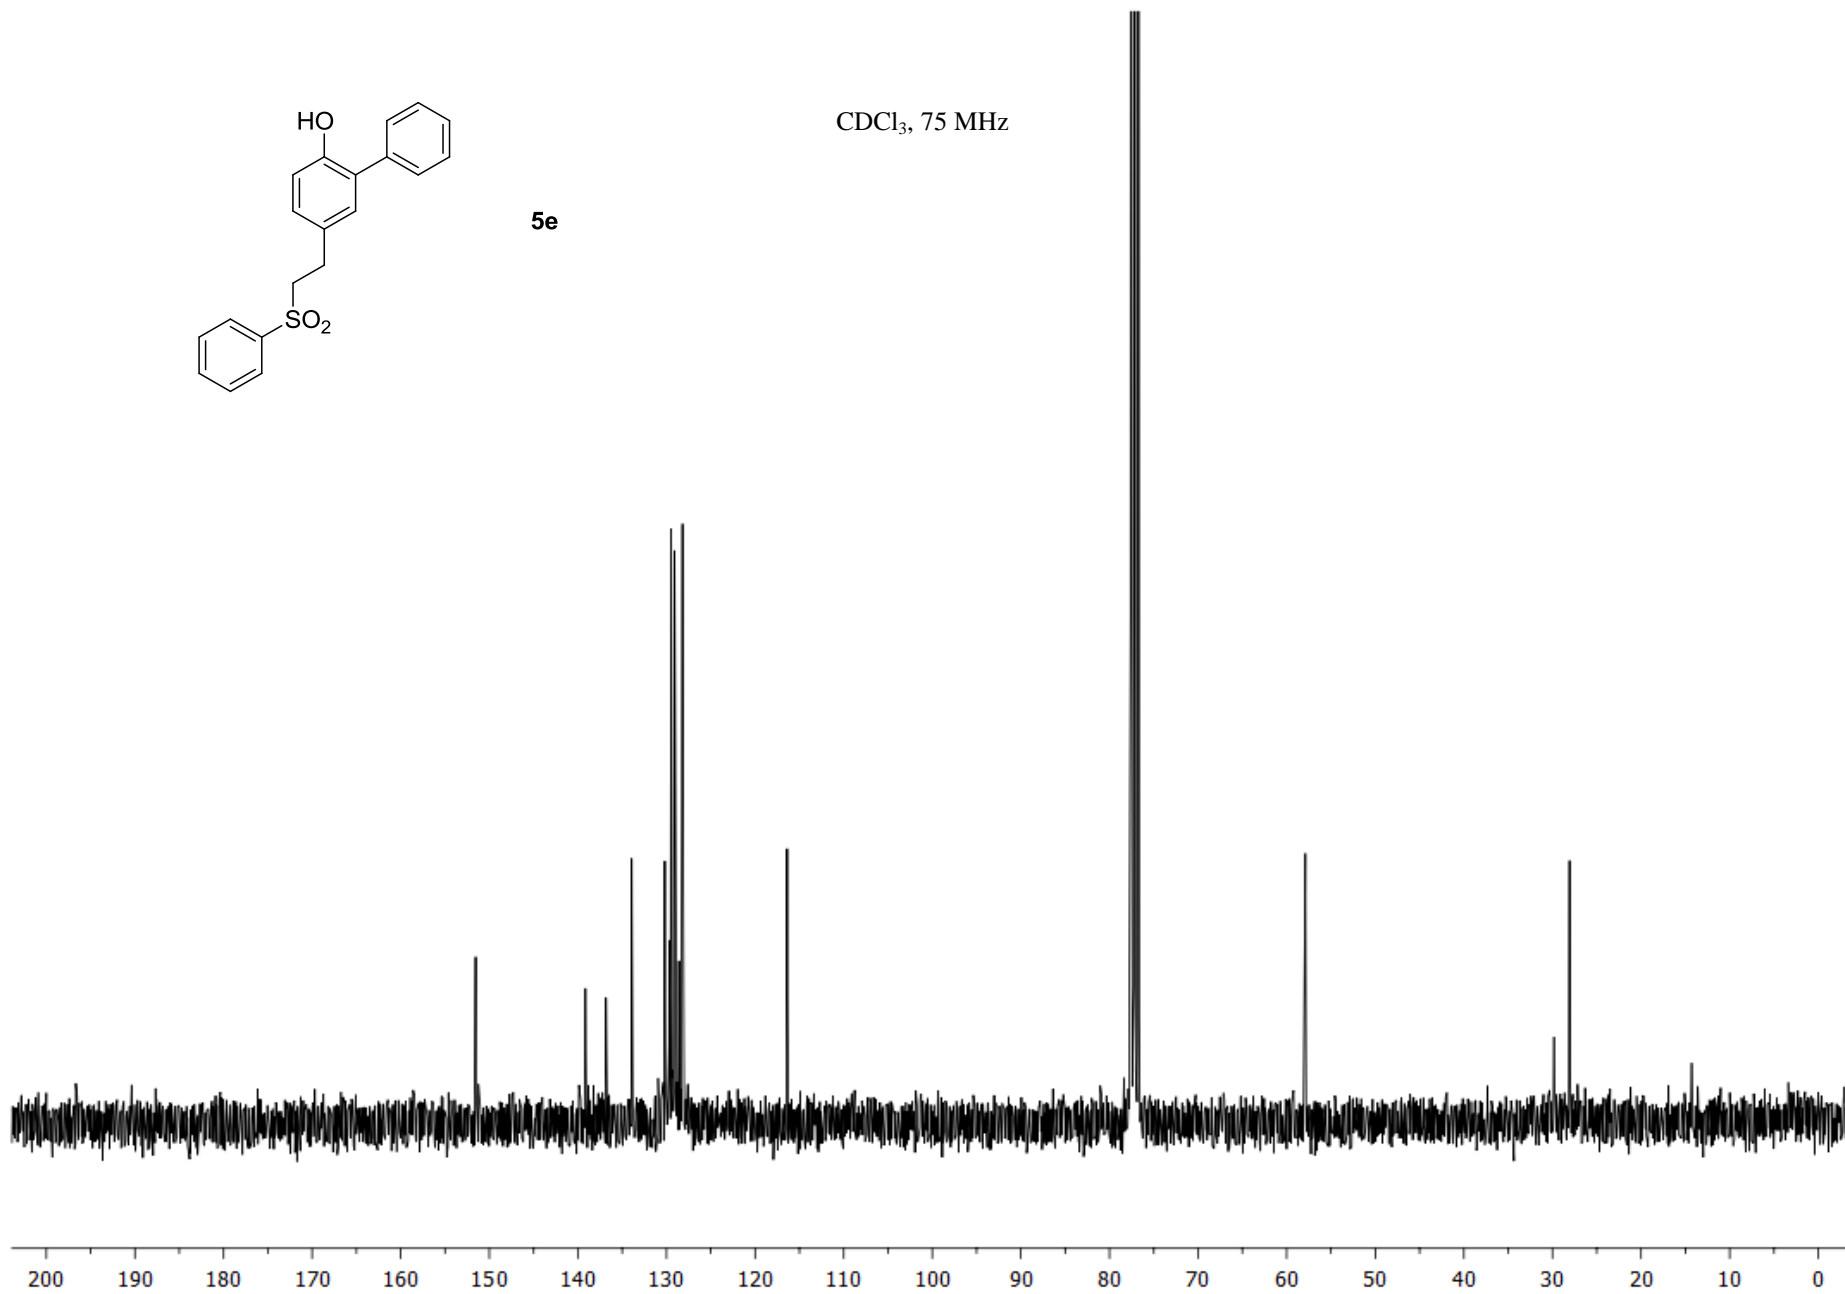

CDCl<sub>3</sub>, 300 MHz

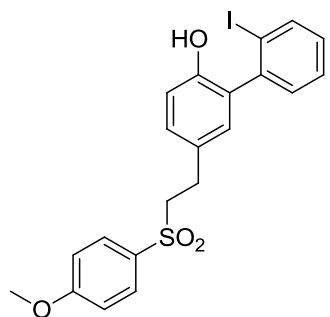

5f

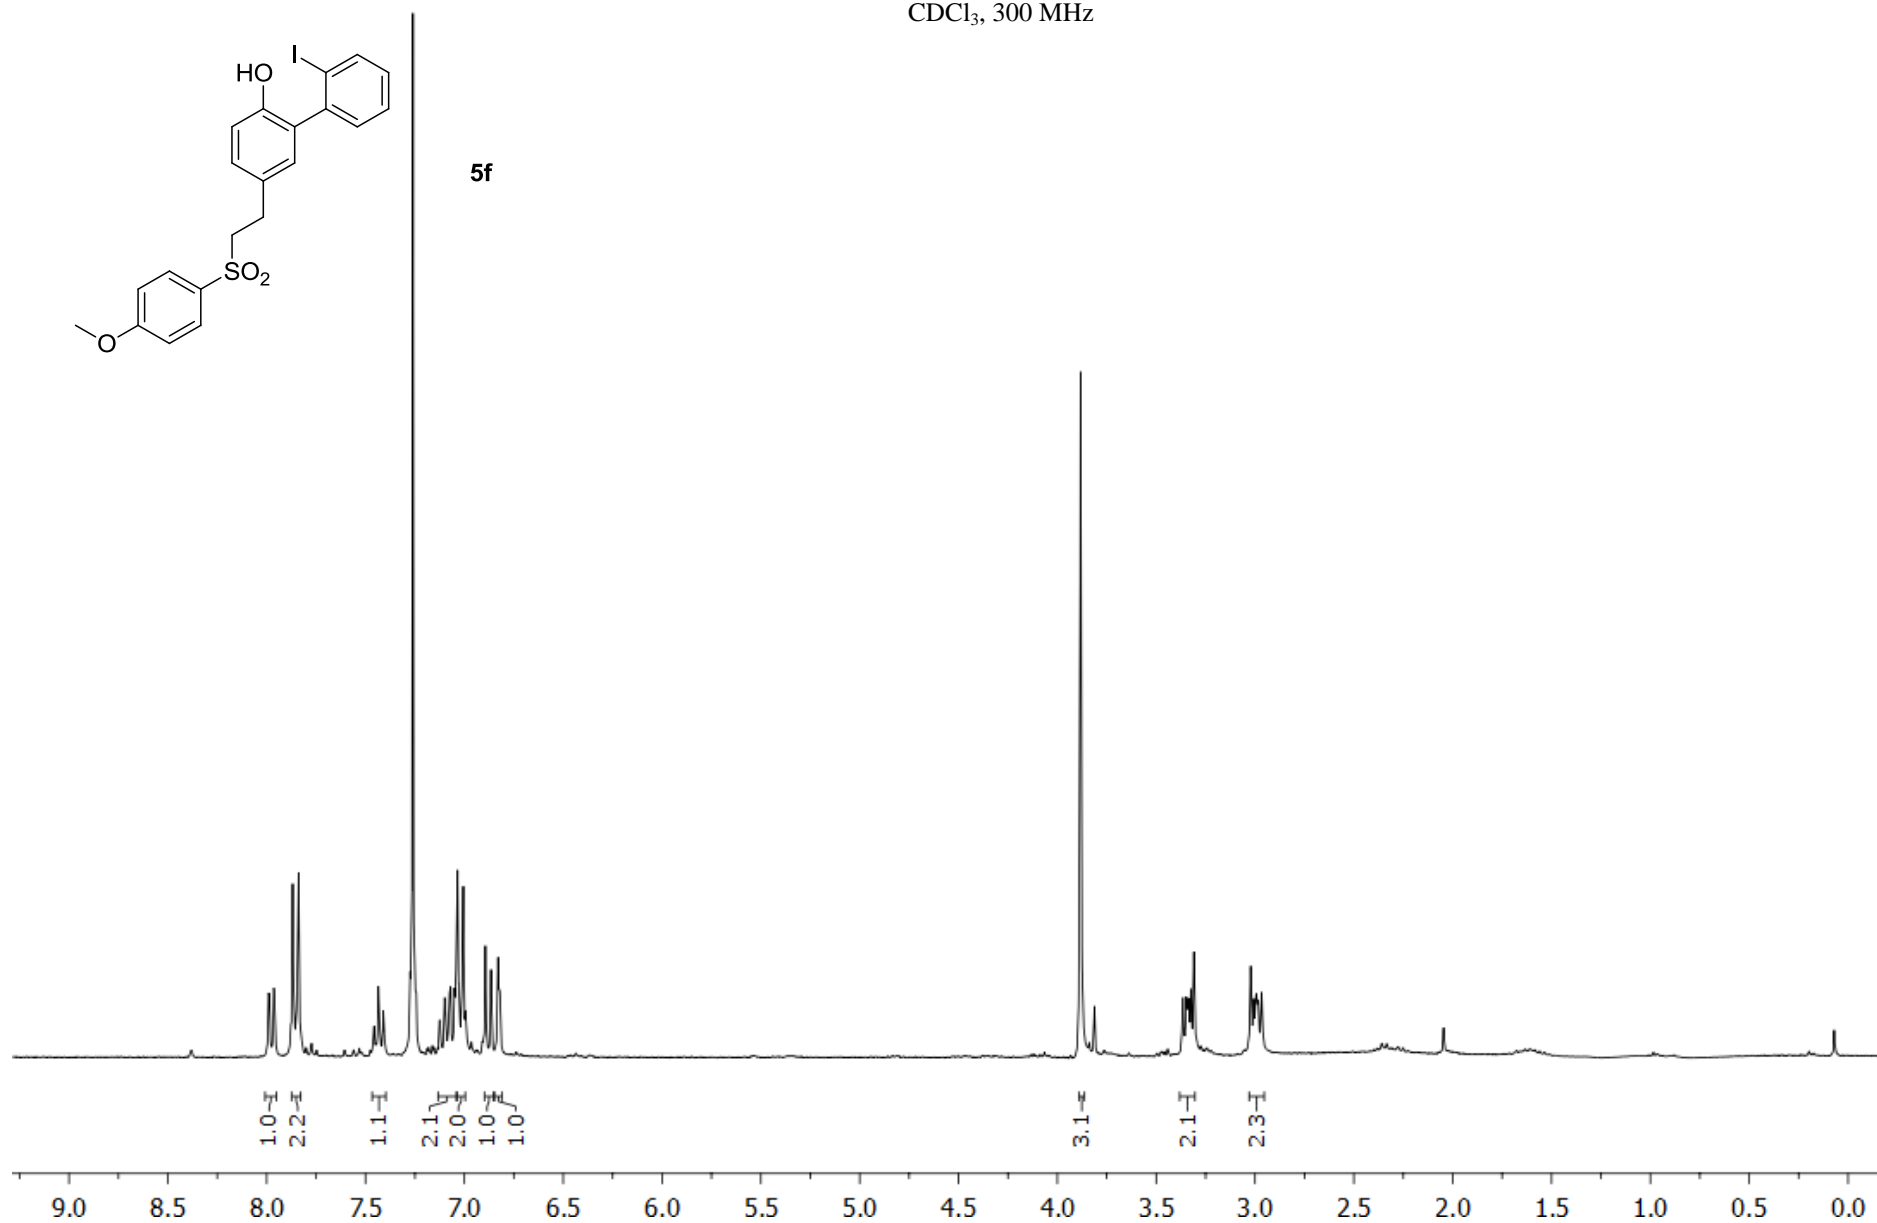

CDCl<sub>3</sub>, 75 MHz

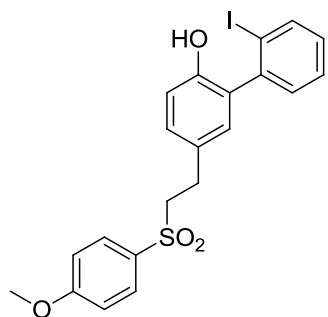

5f

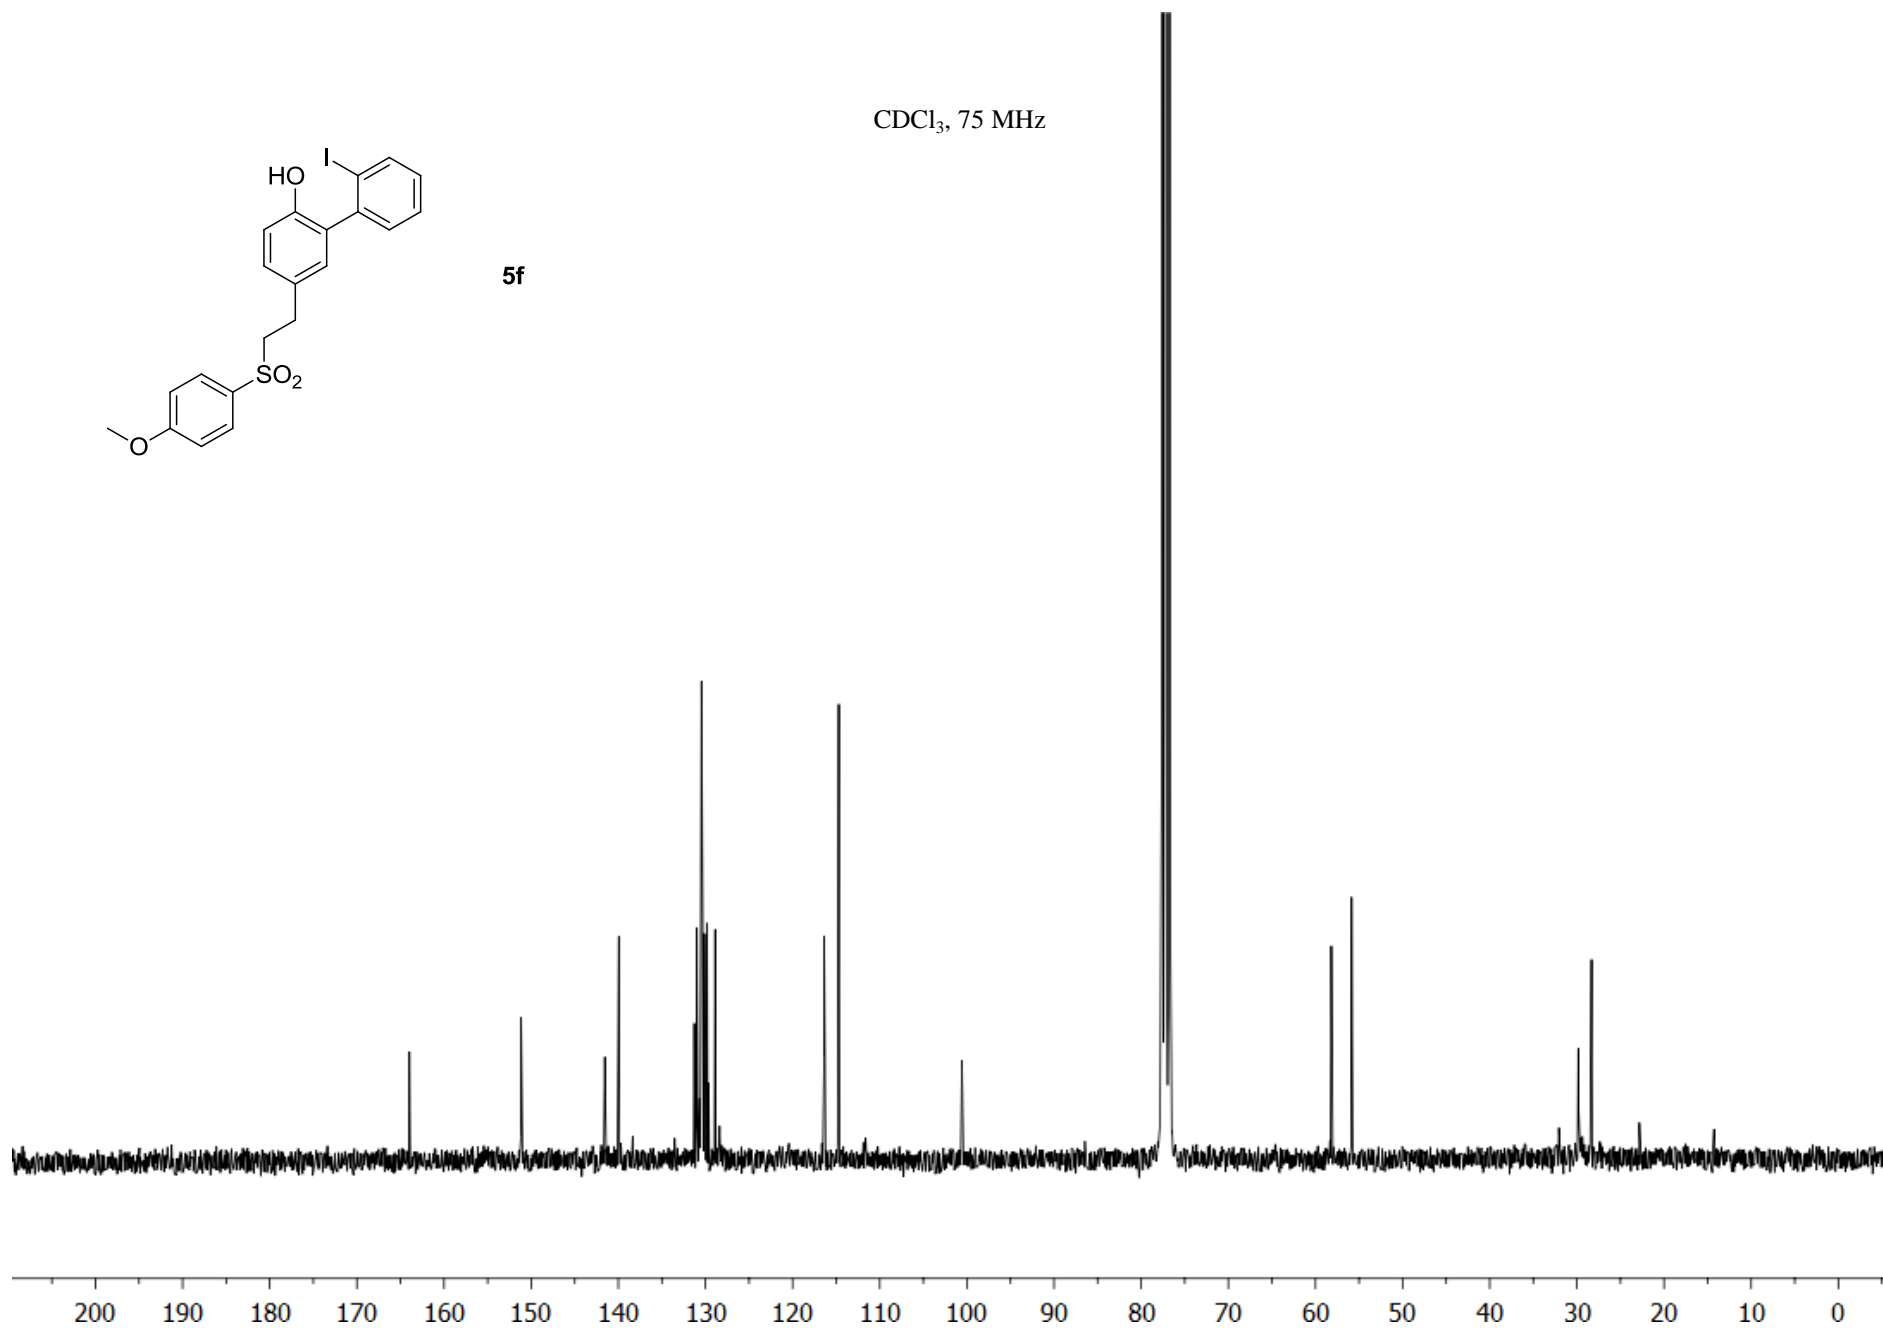

CDCl<sub>3</sub>, 300 MHz

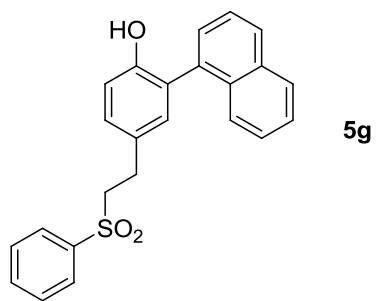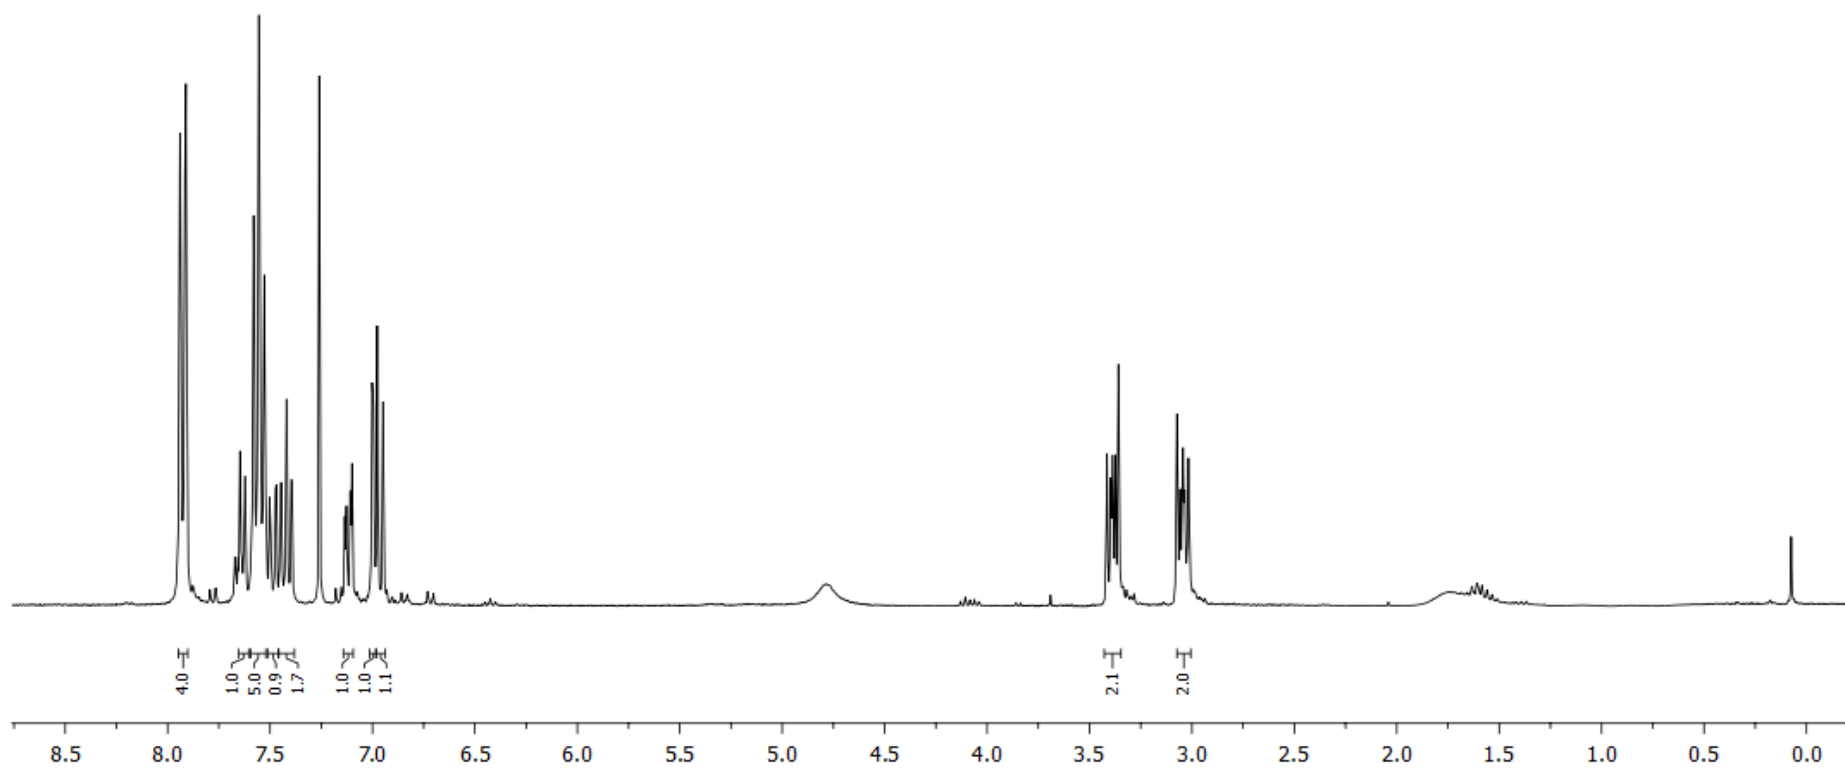

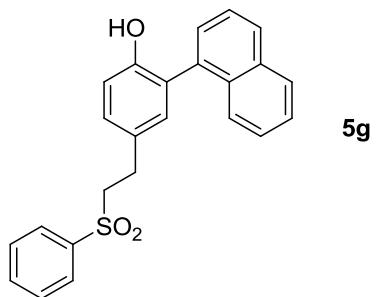

CDCl<sub>3</sub>, 75 MHz

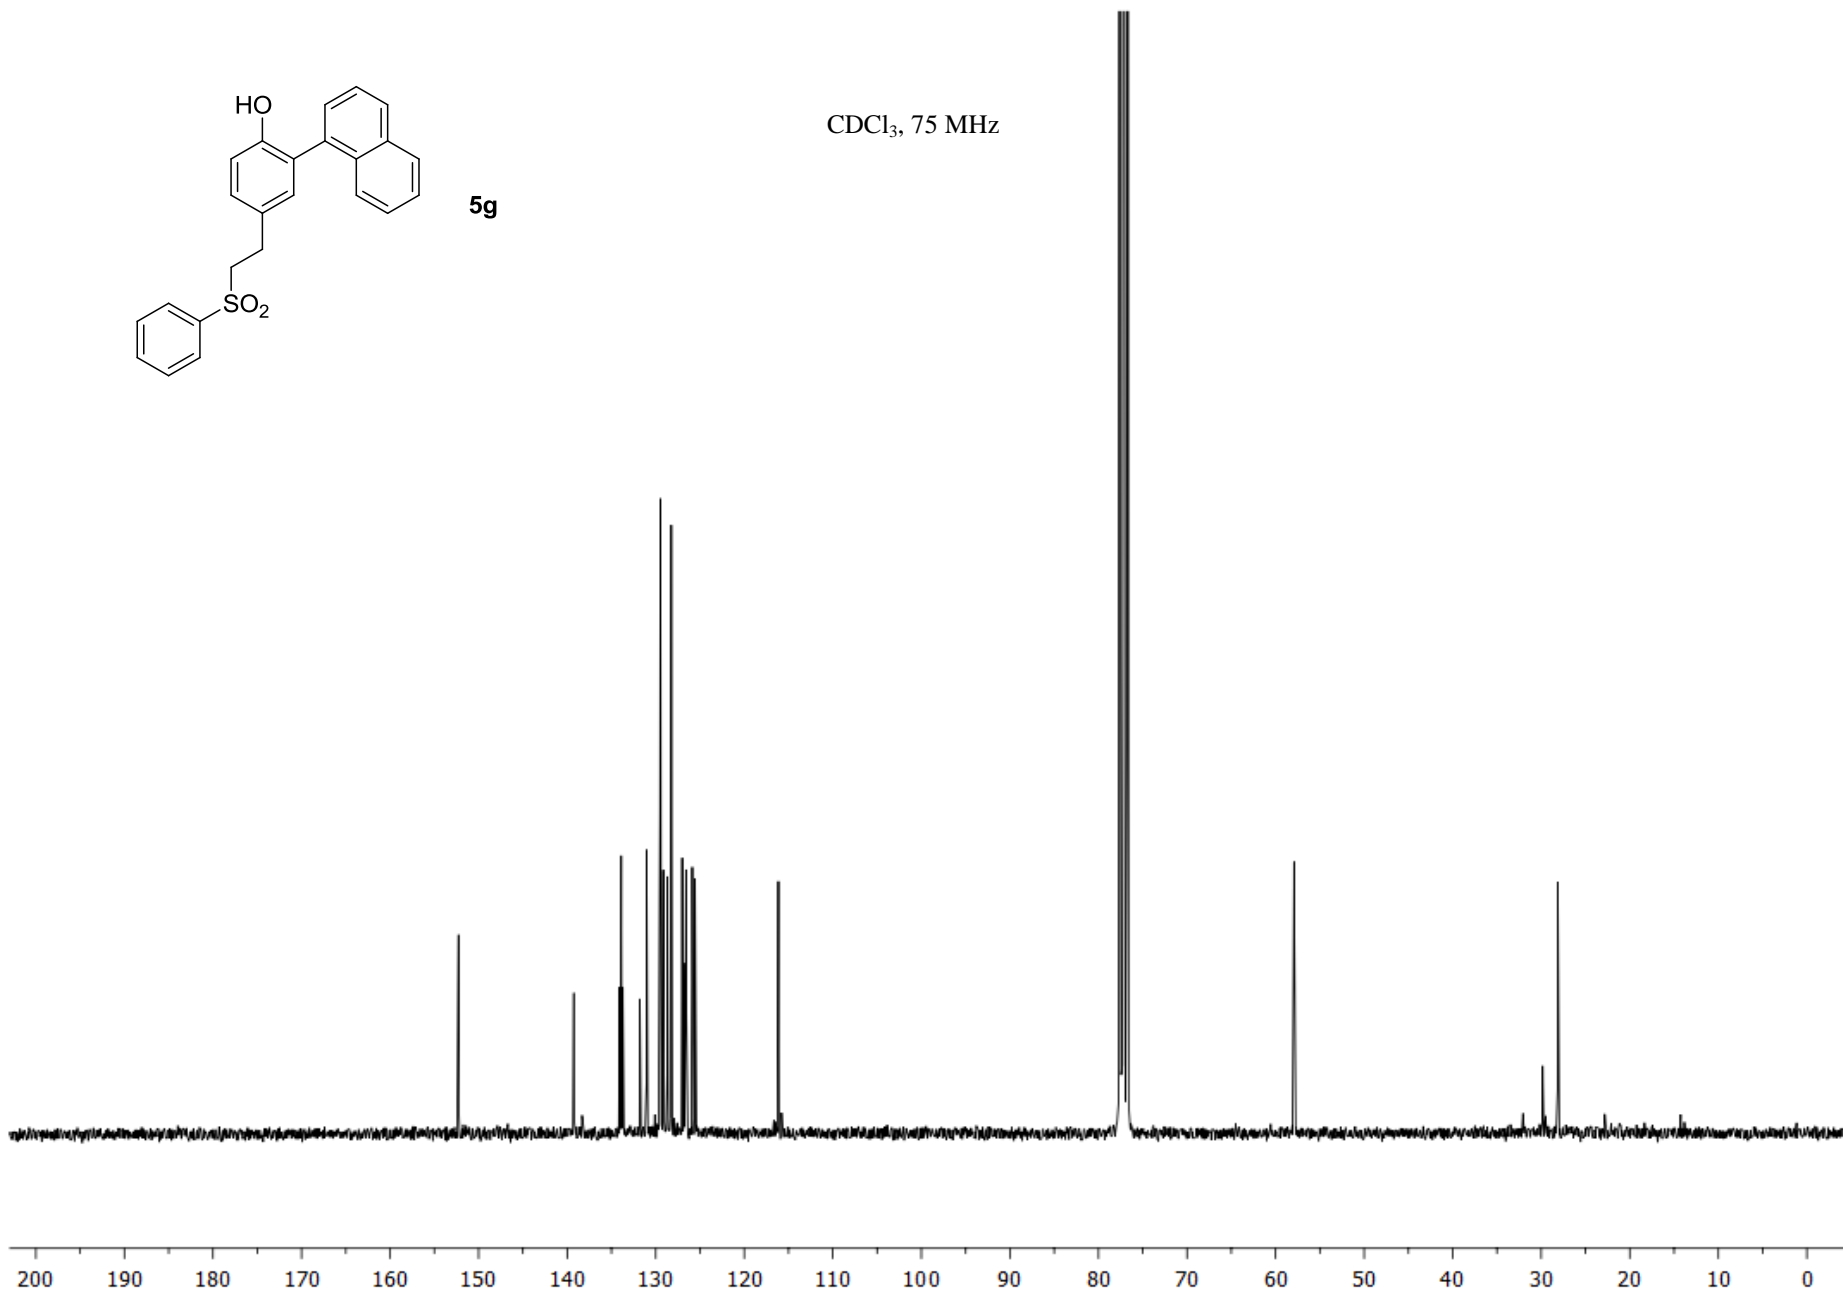

CDCl<sub>3</sub>, 300 MHz

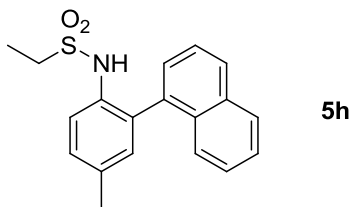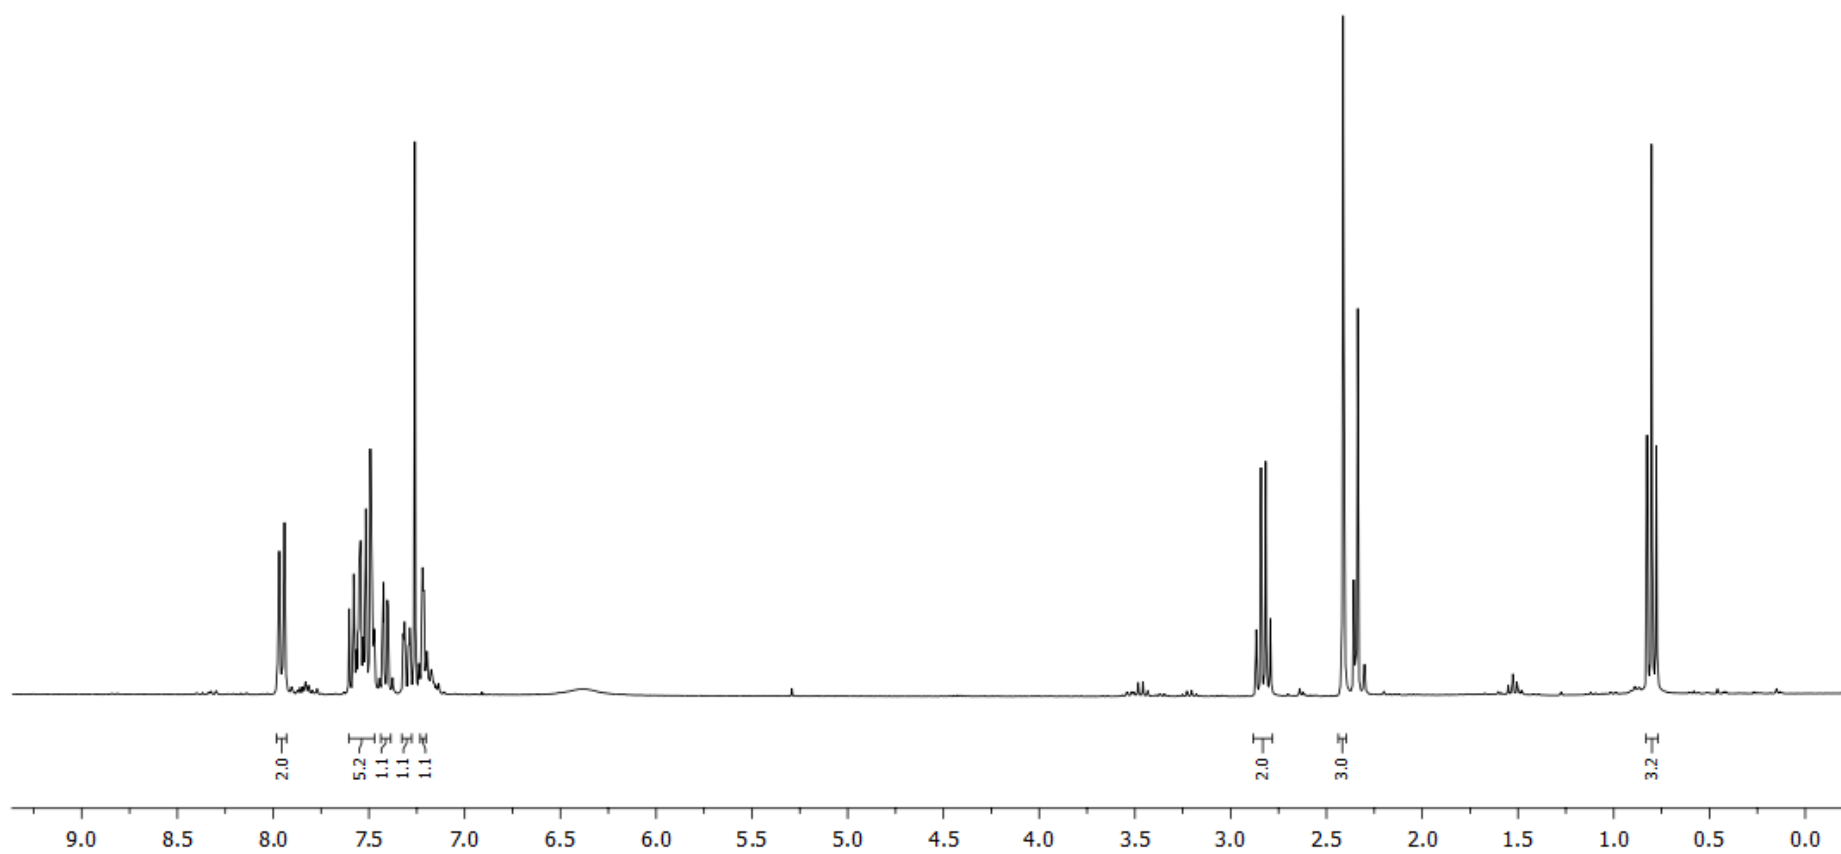

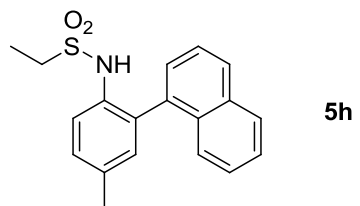

CDCl<sub>3</sub>, 75 MHz

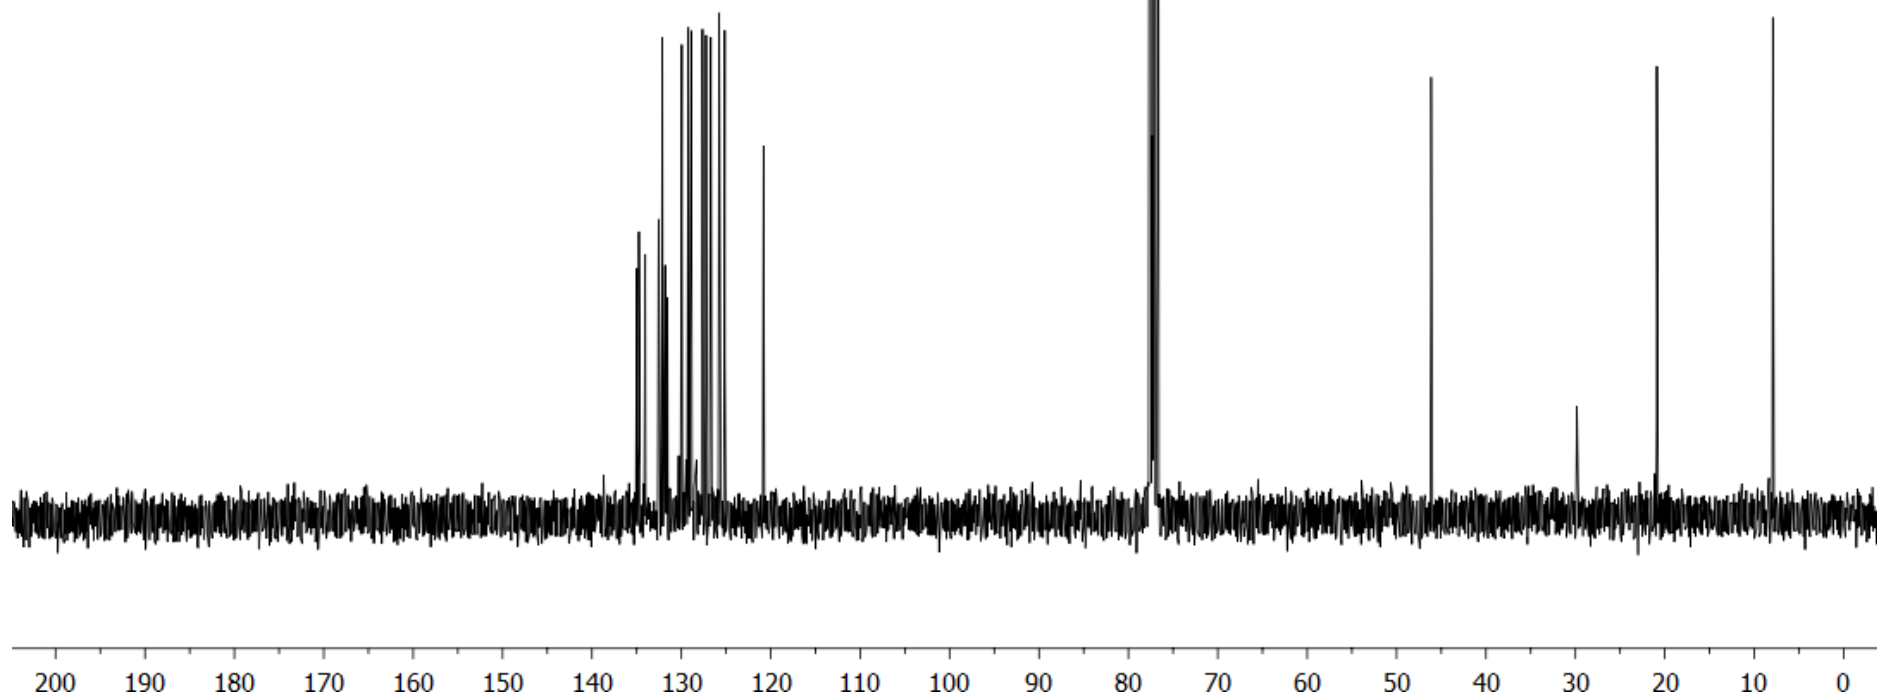

CDCl<sub>3</sub>, 300 MHz

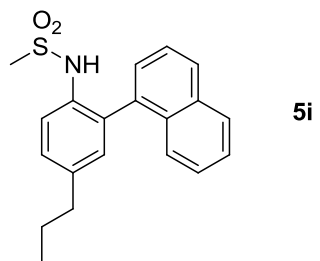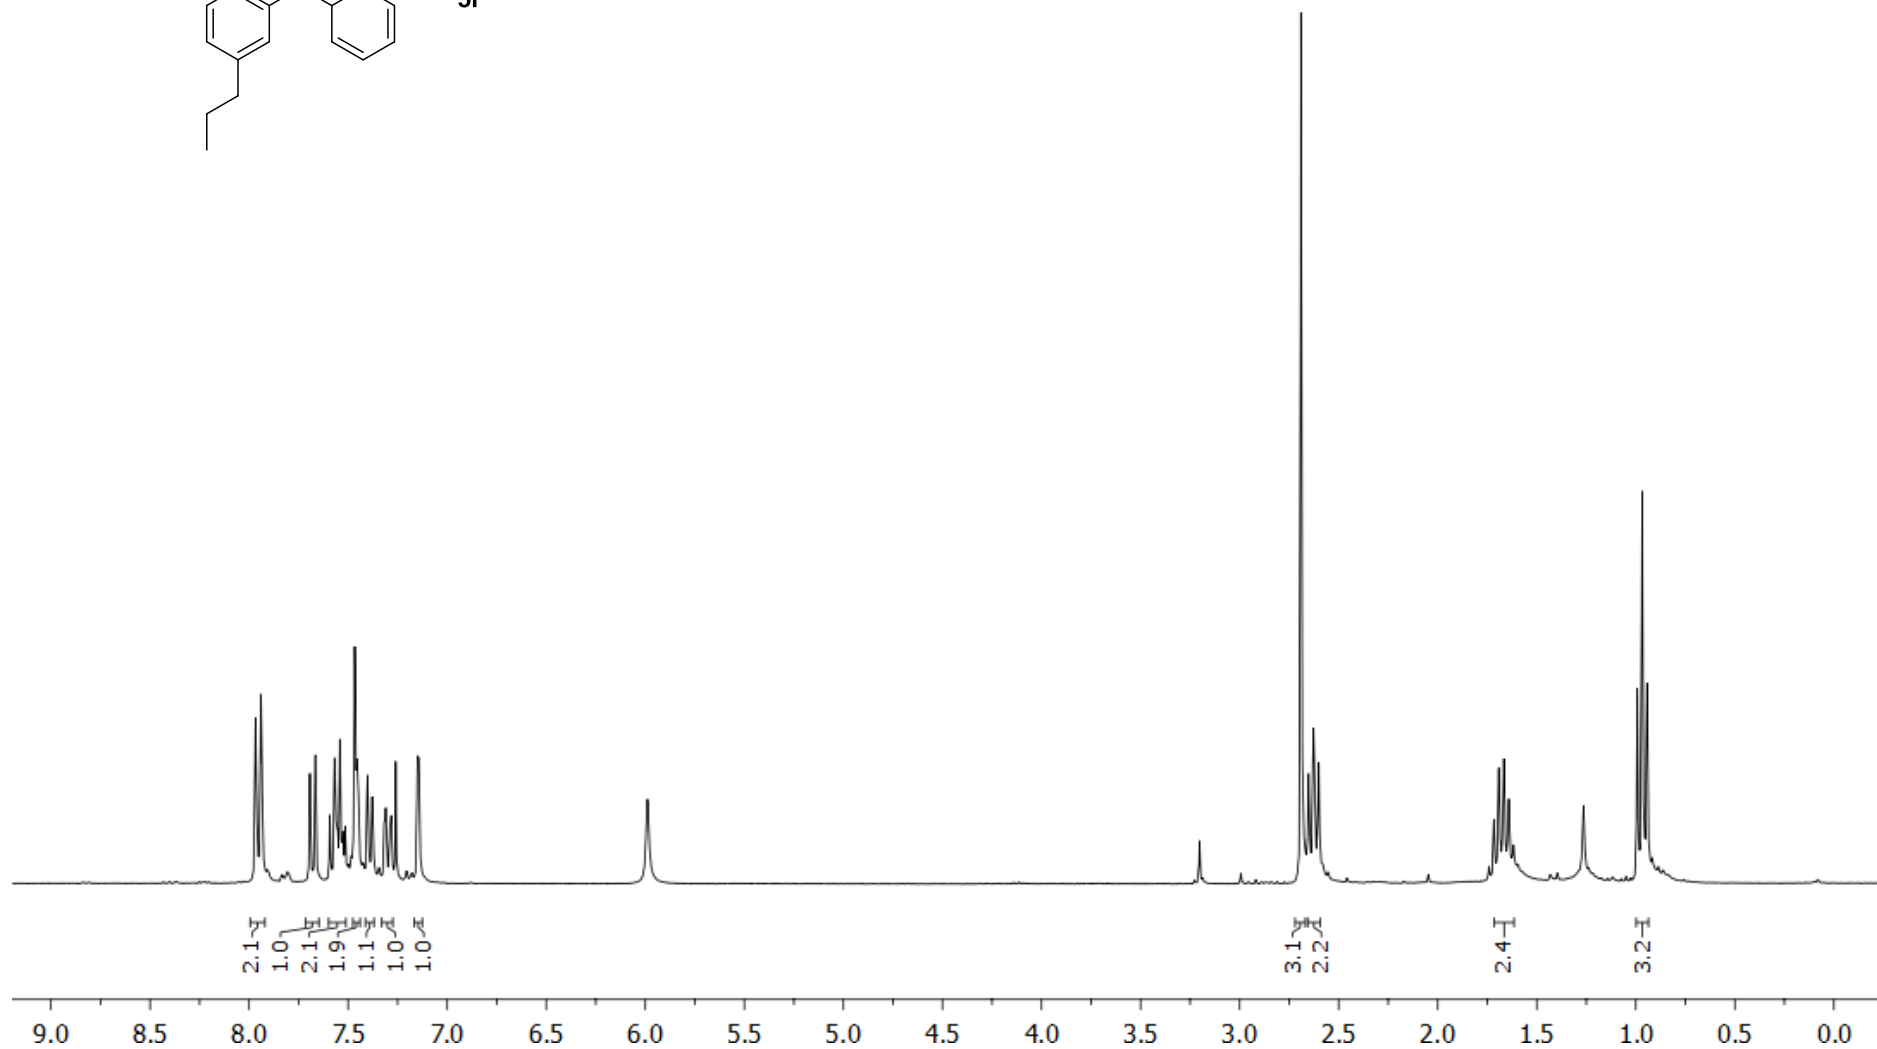



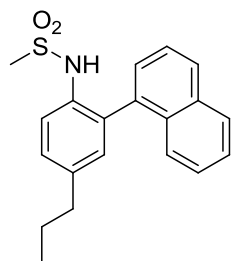

**5i**

CDCl<sub>3</sub>, 75 MHz

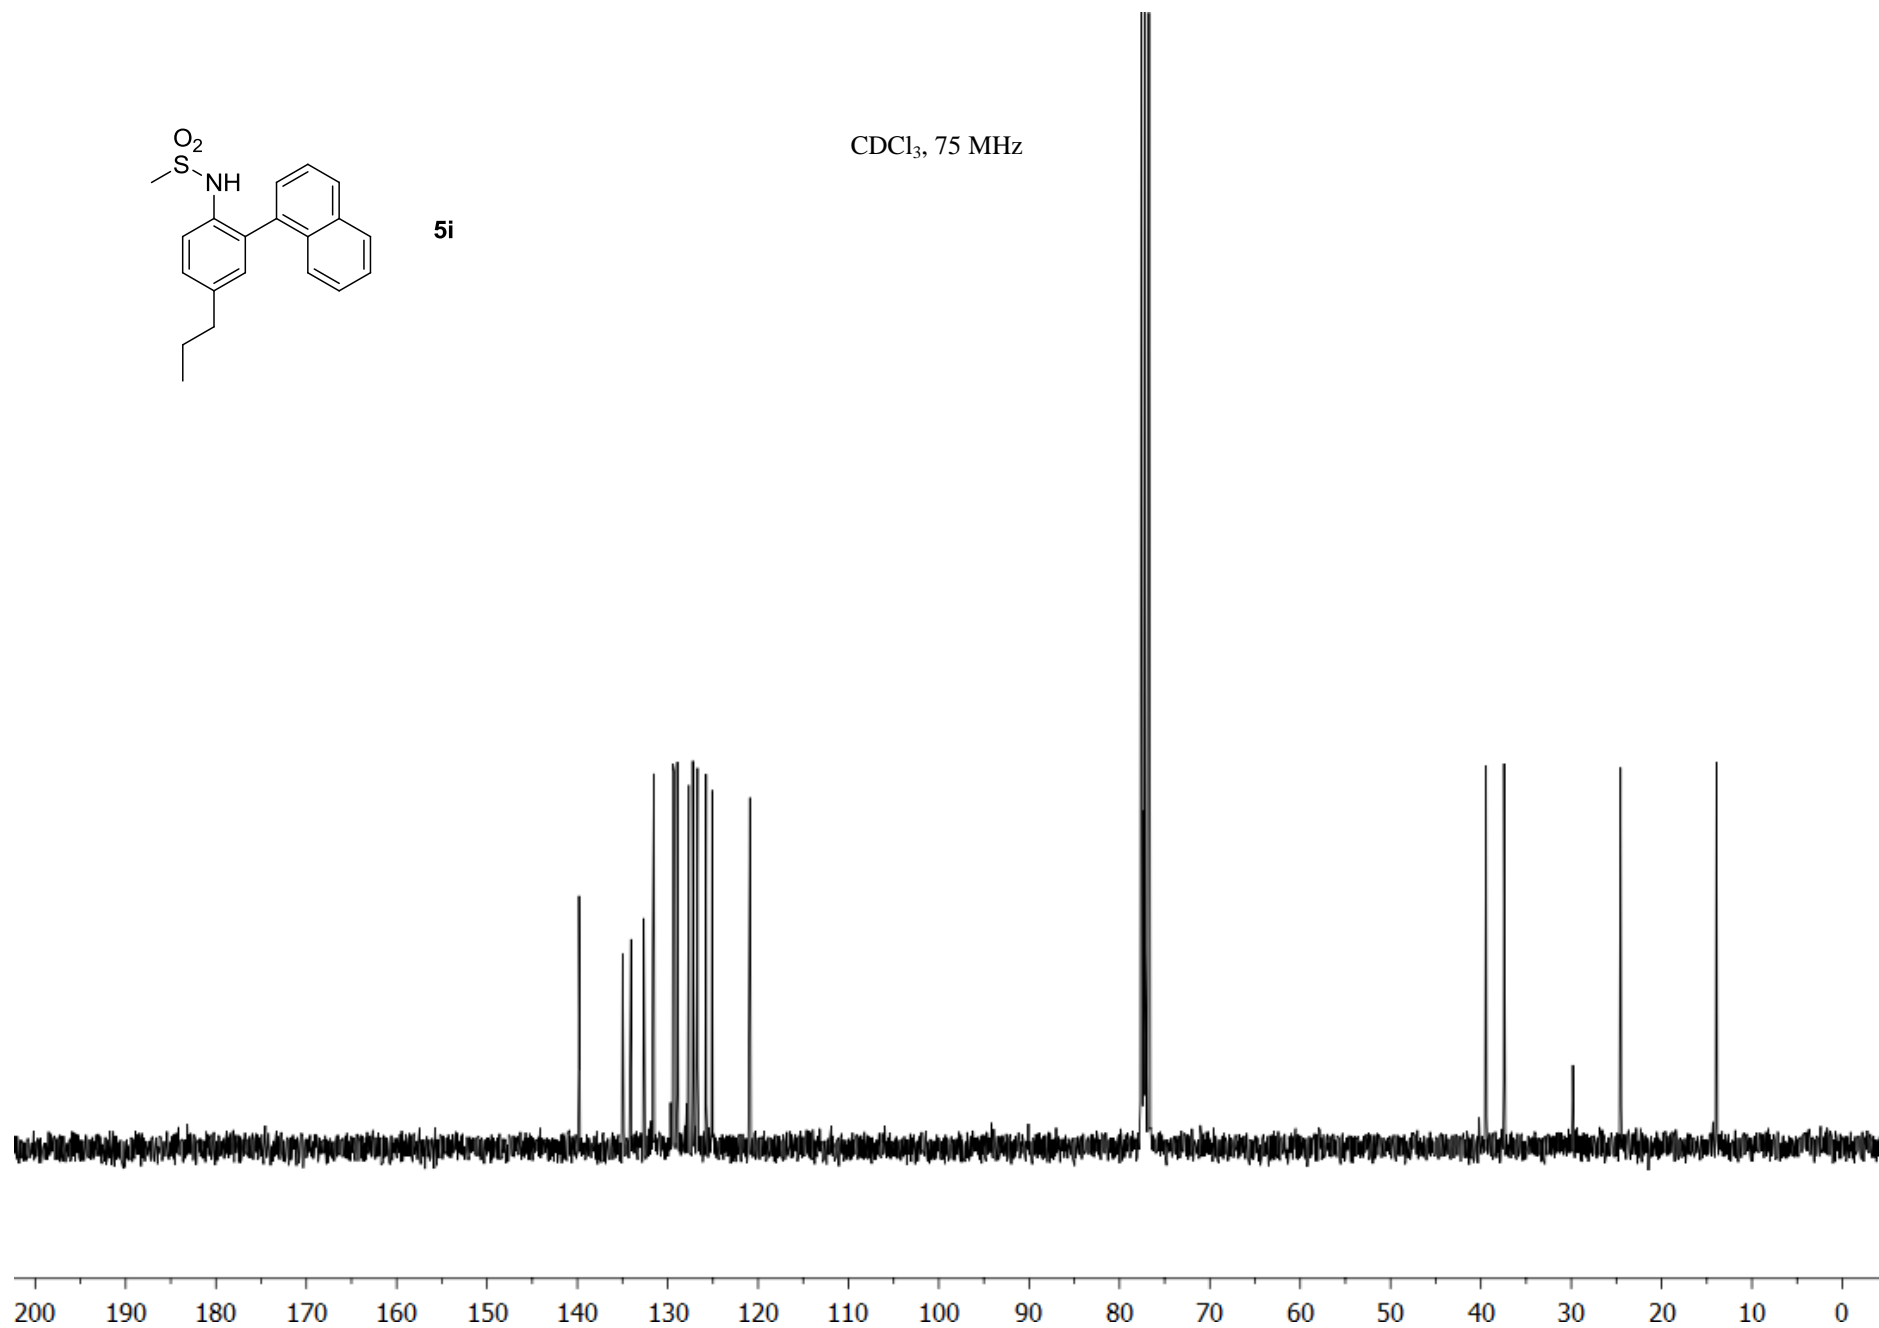

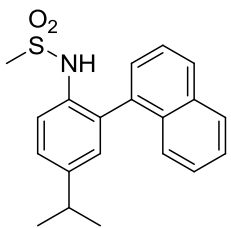

5j

CDCl<sub>3</sub>, 300 MHz

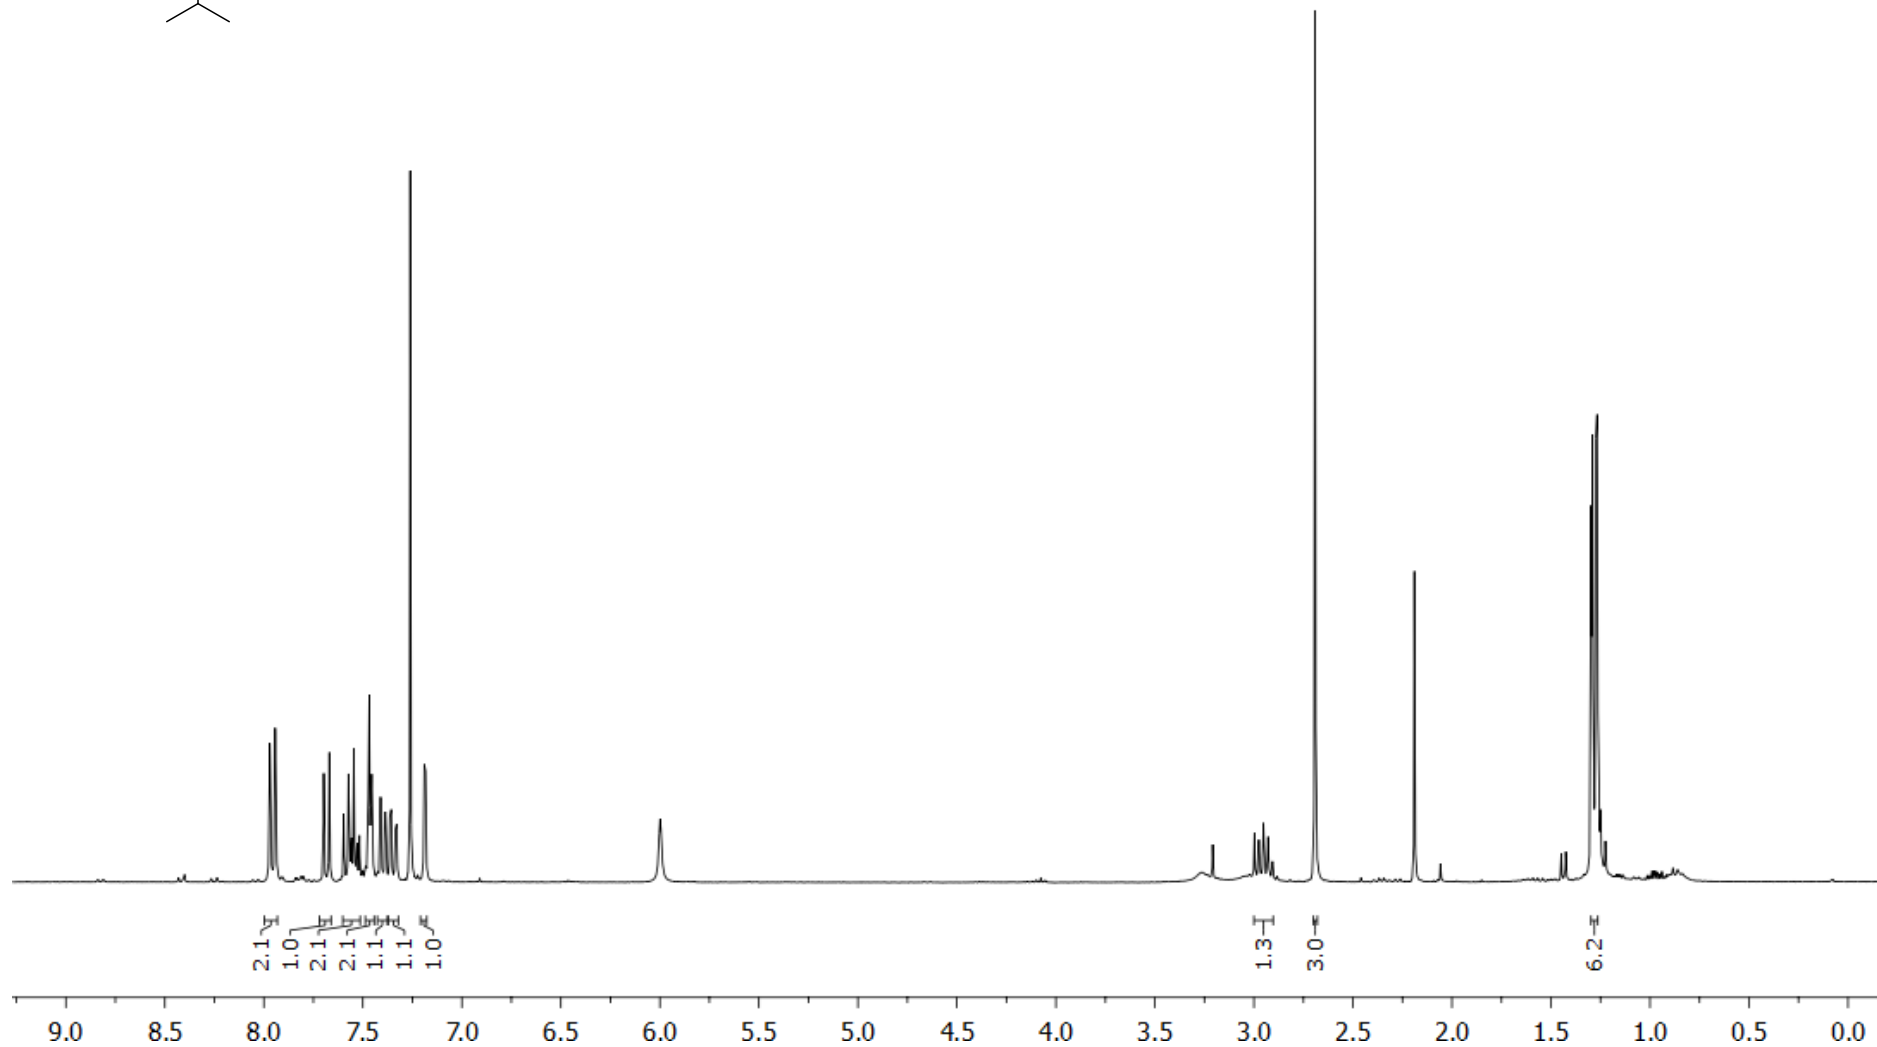

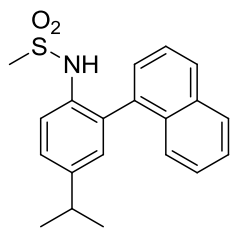

**5j**

CDCl<sub>3</sub>, 75 MHz

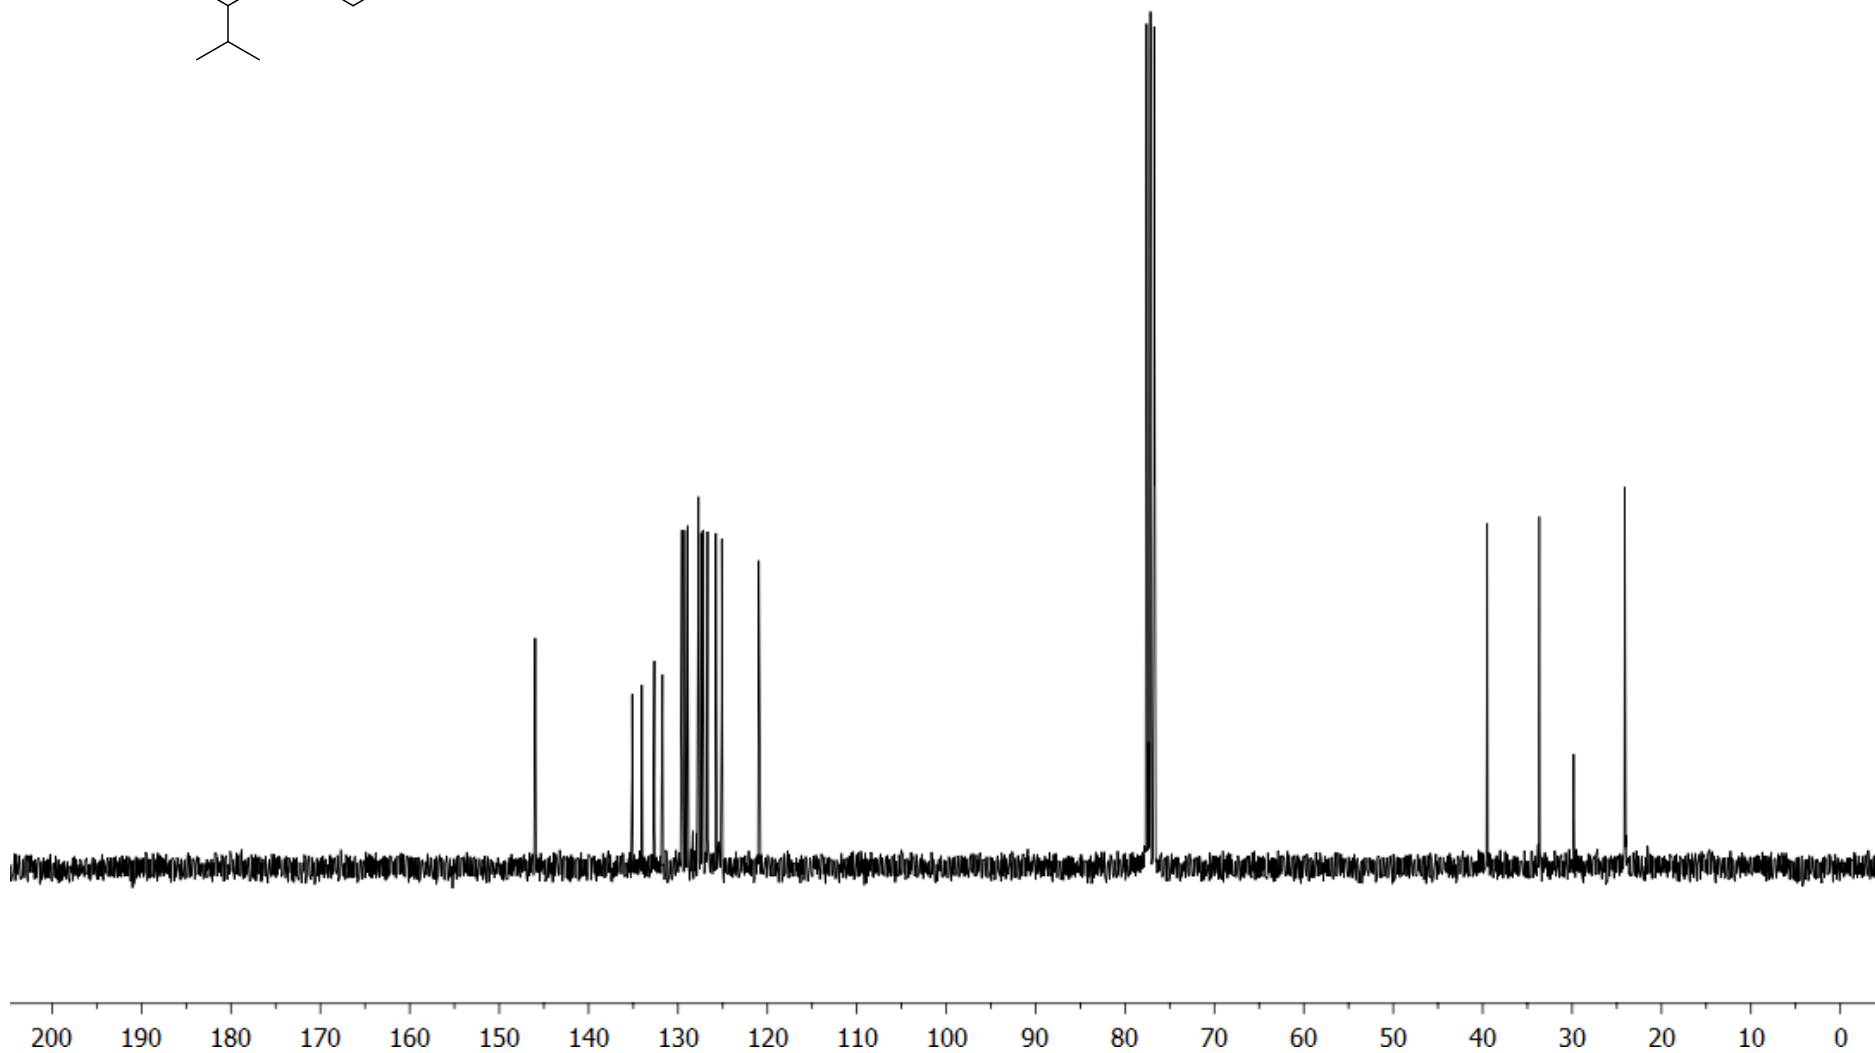

CDCl<sub>3</sub>, 300 MHz

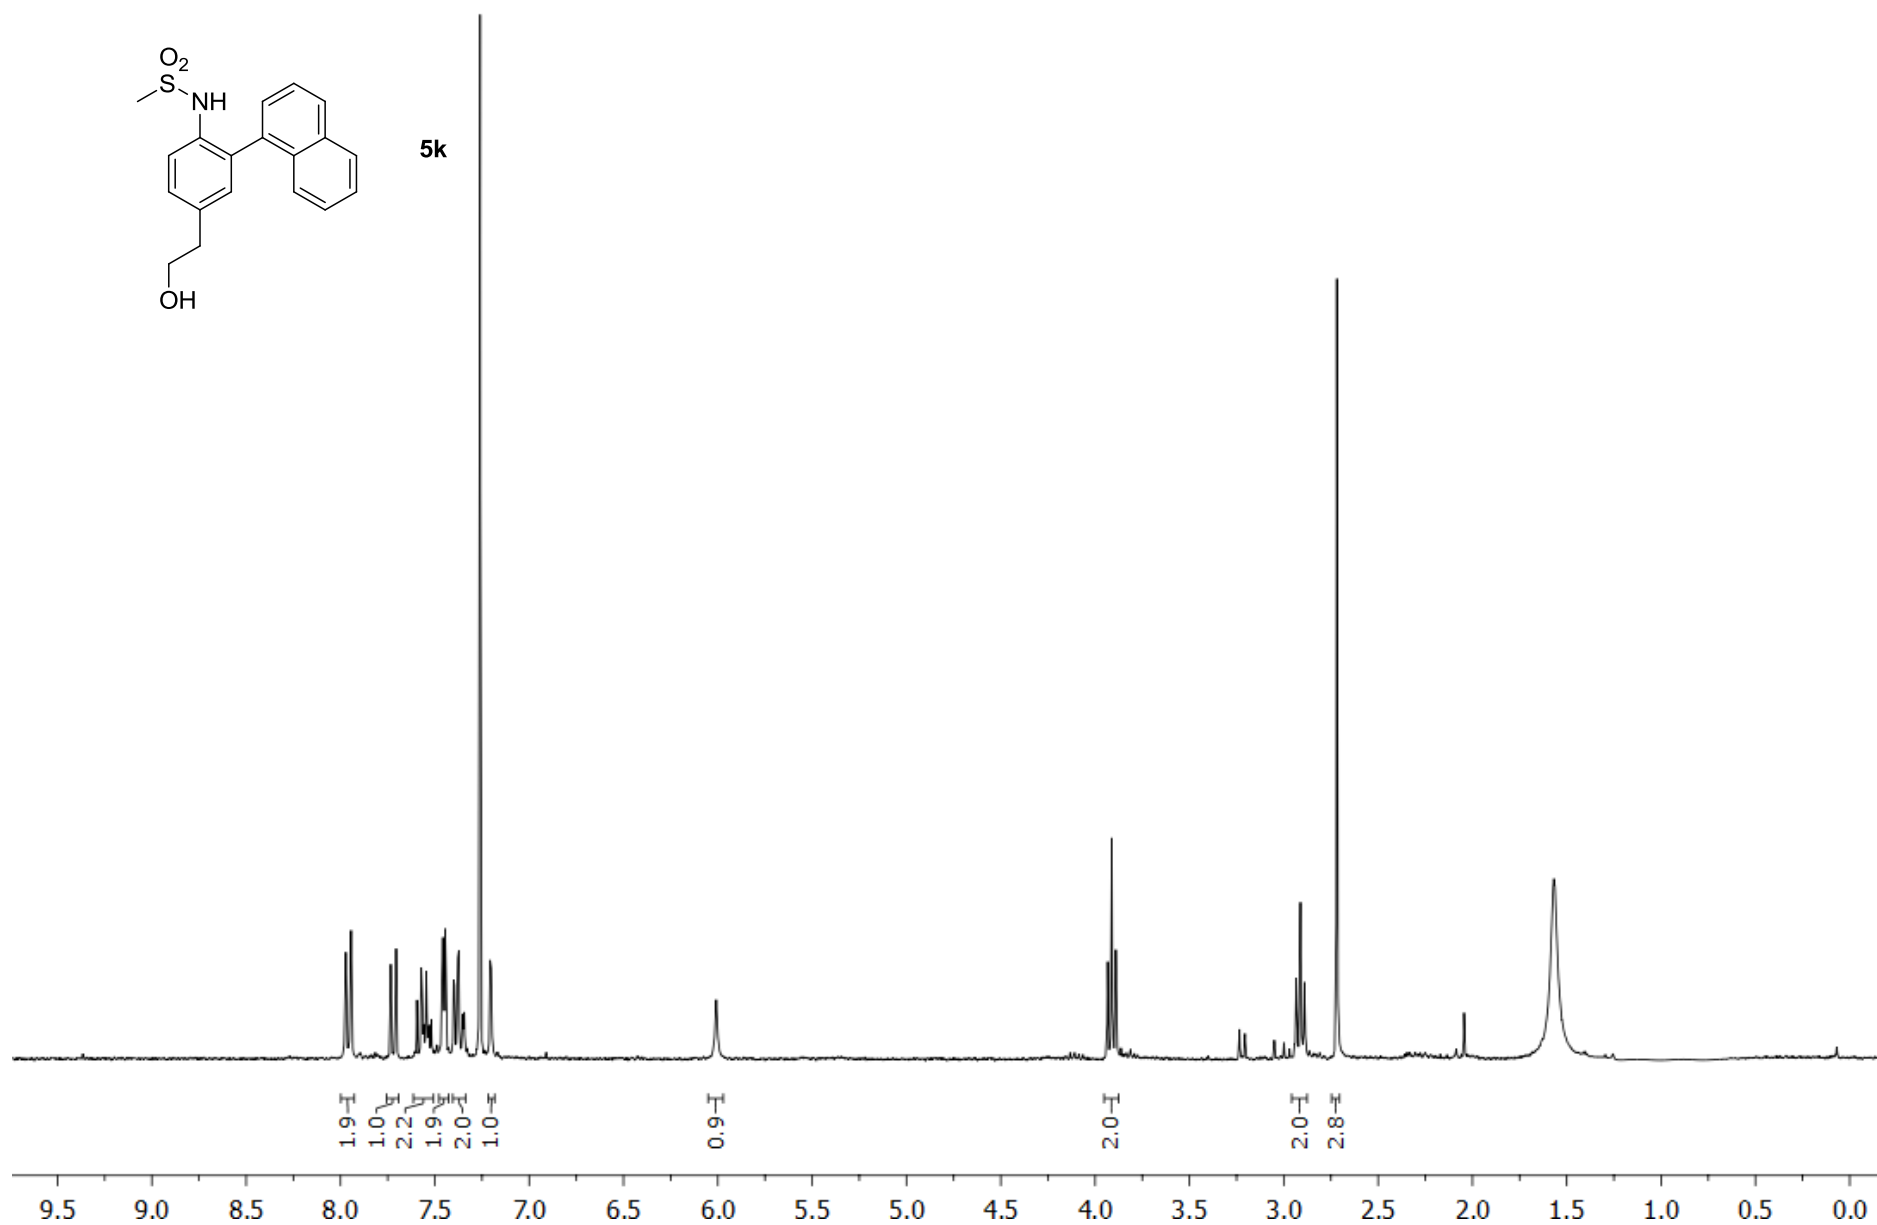

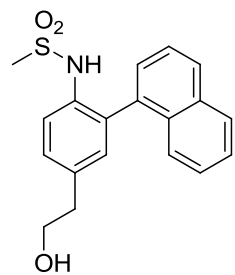

5k

CDCl<sub>3</sub>, 75 MHz

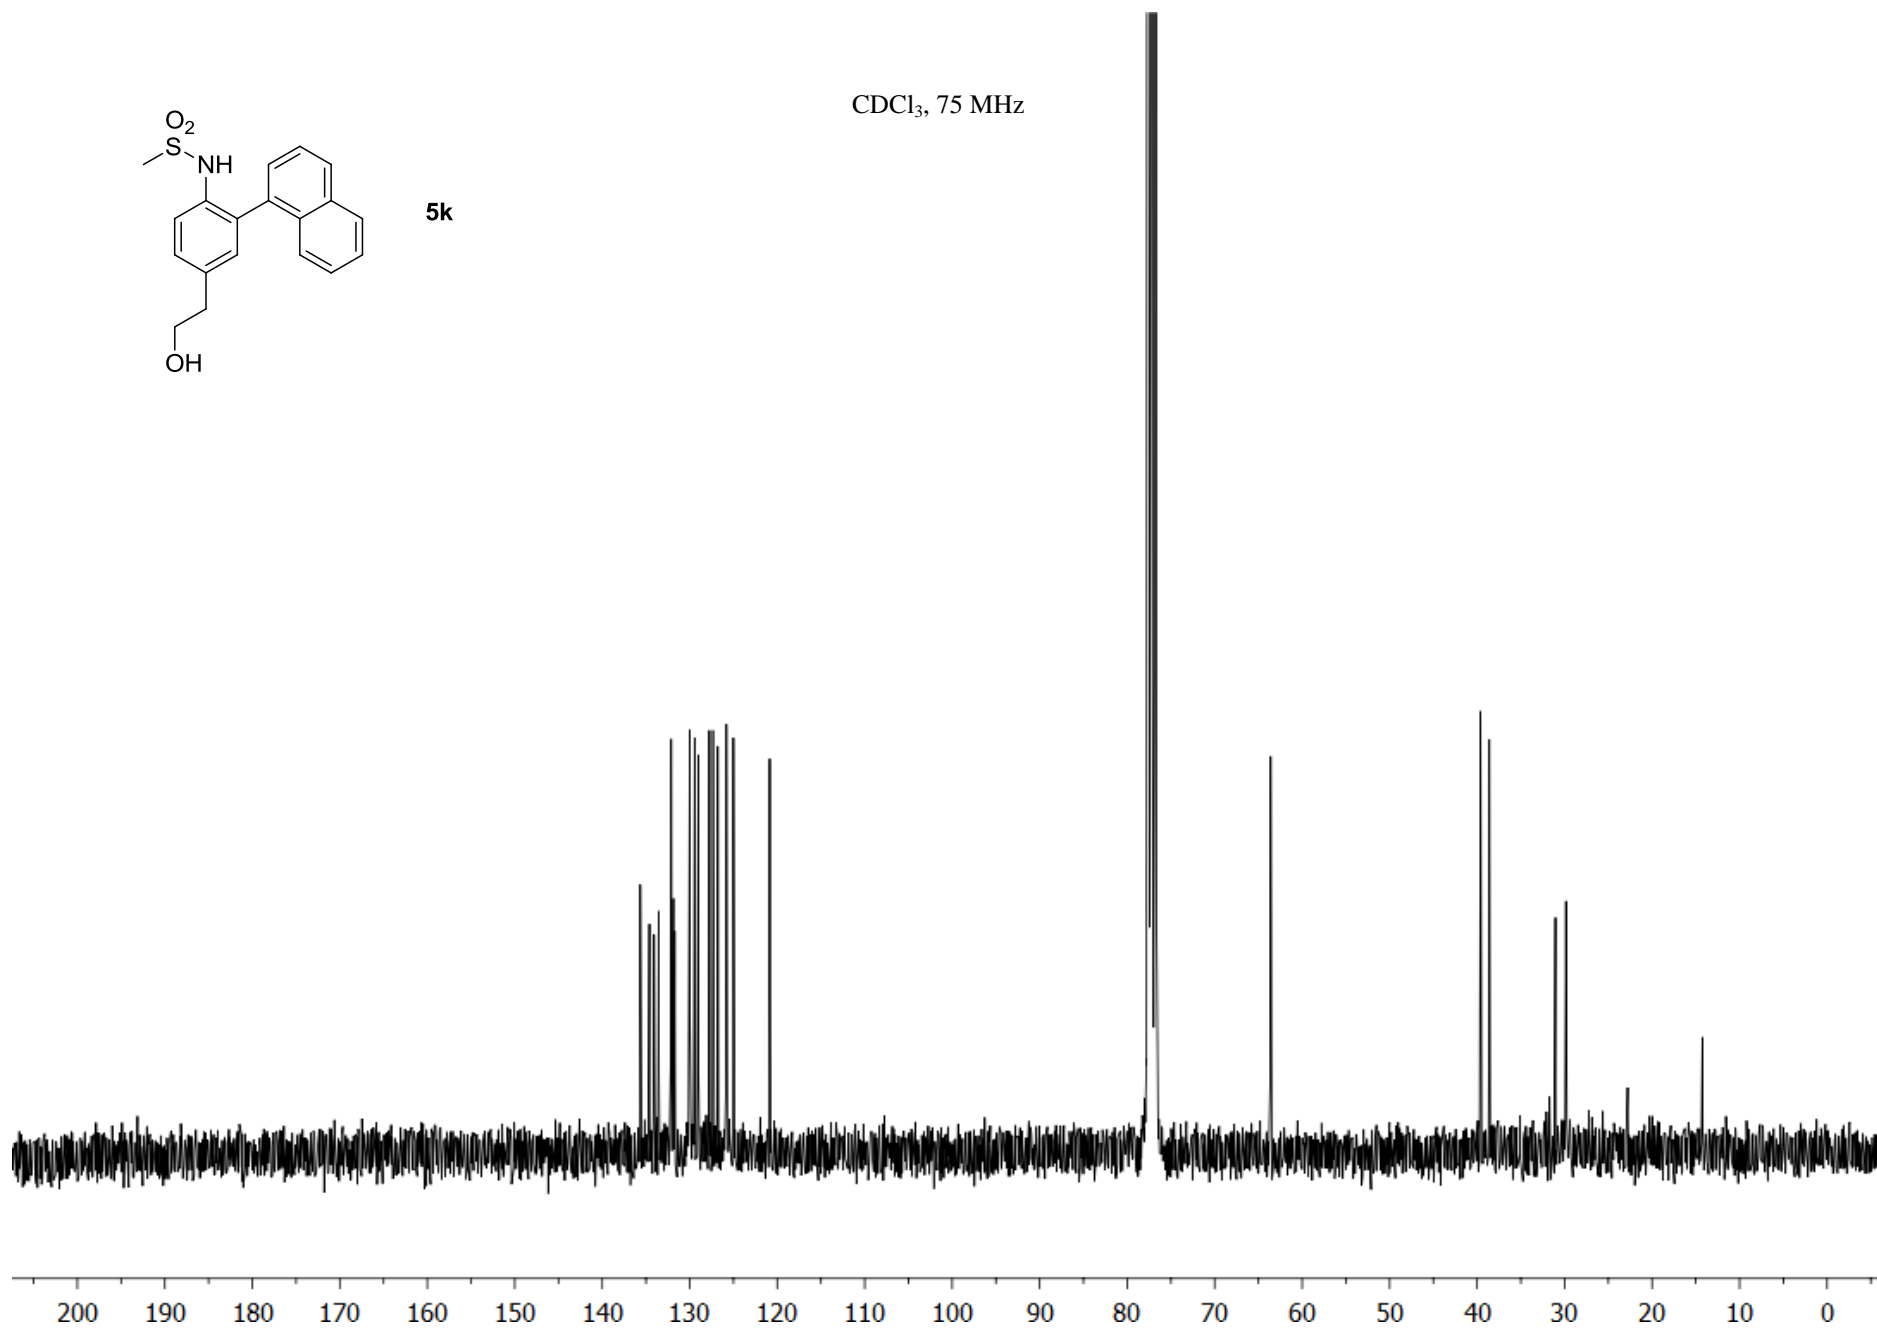

CDCl<sub>3</sub>, 300 MHz

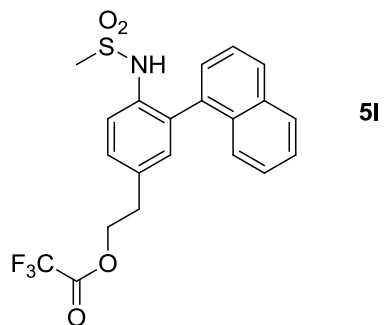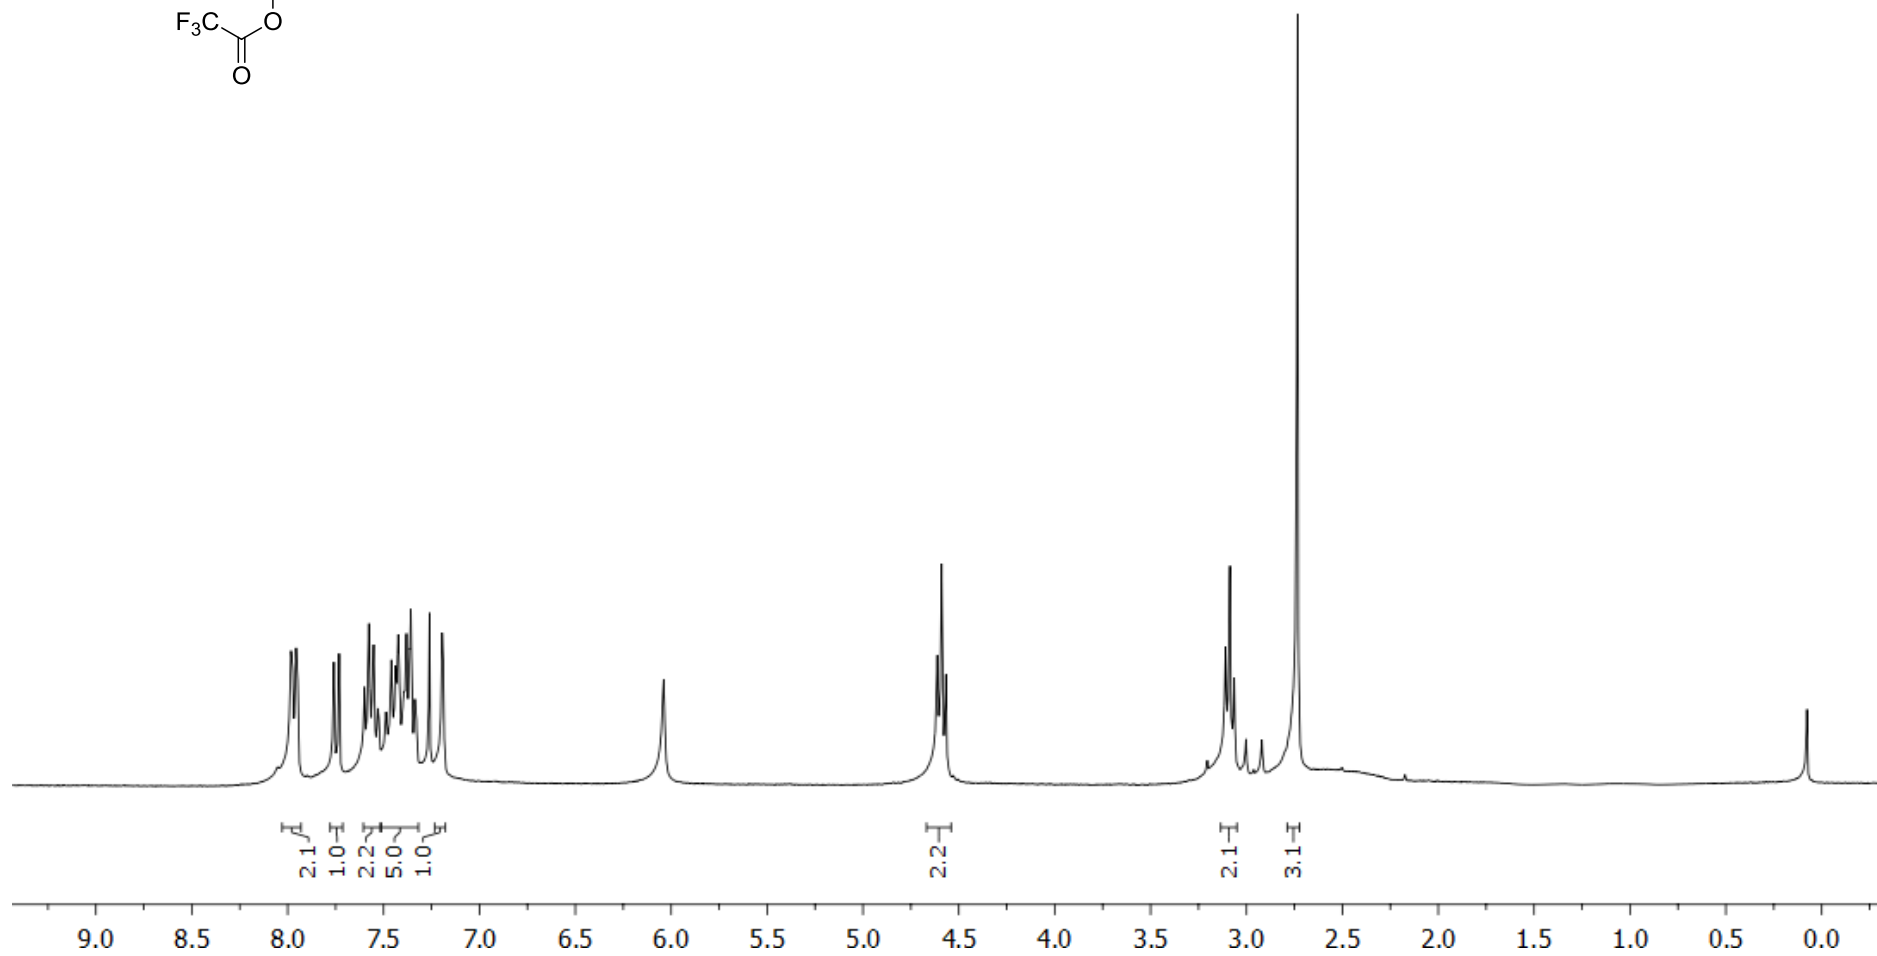

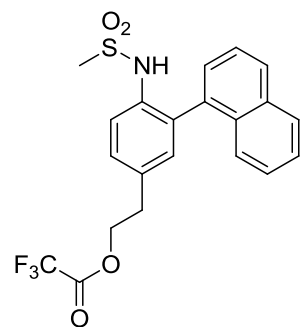

**51**

CDCl<sub>3</sub>, 75 MHz

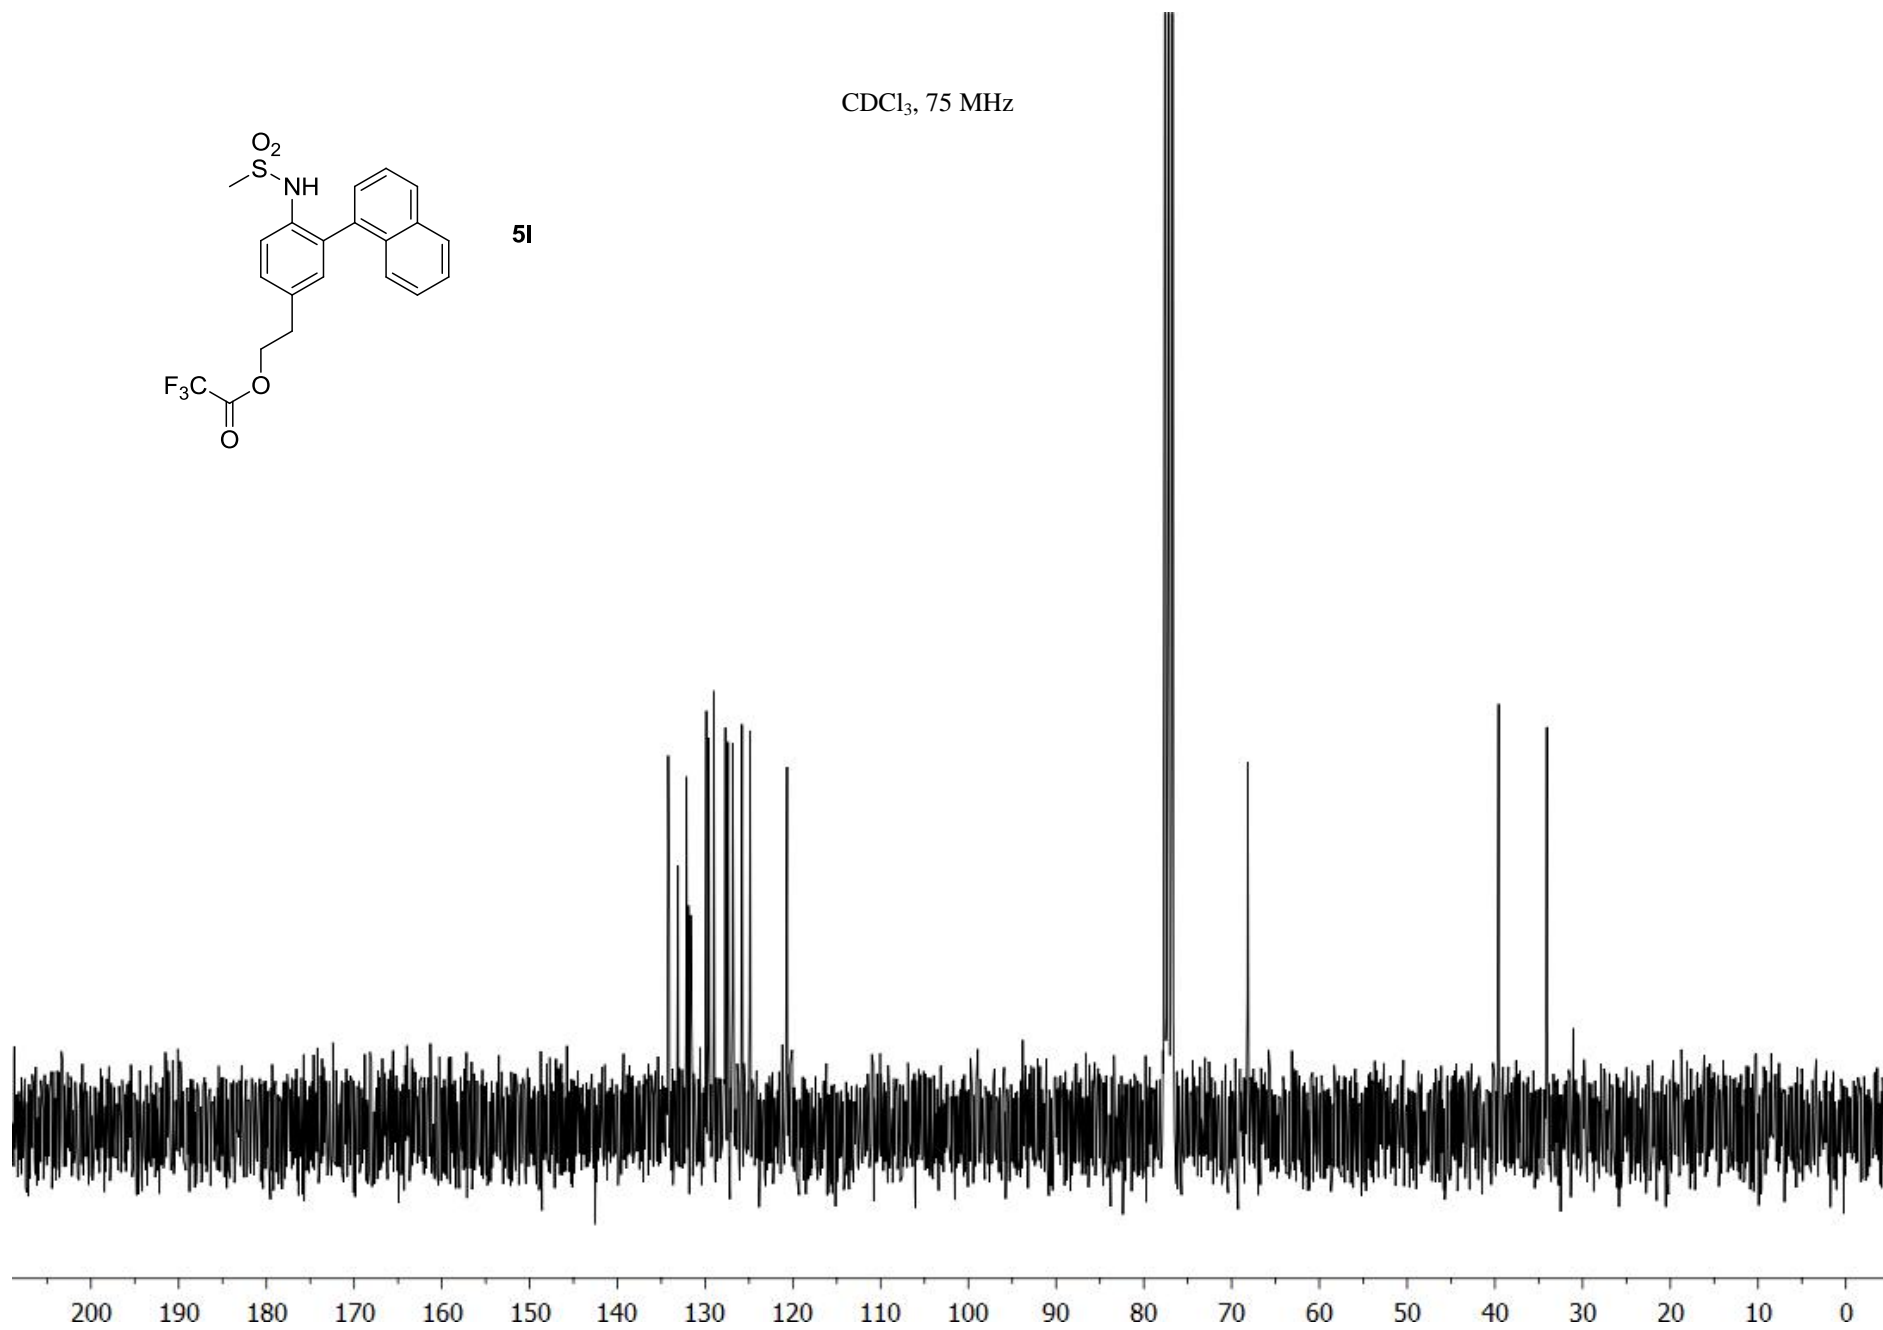

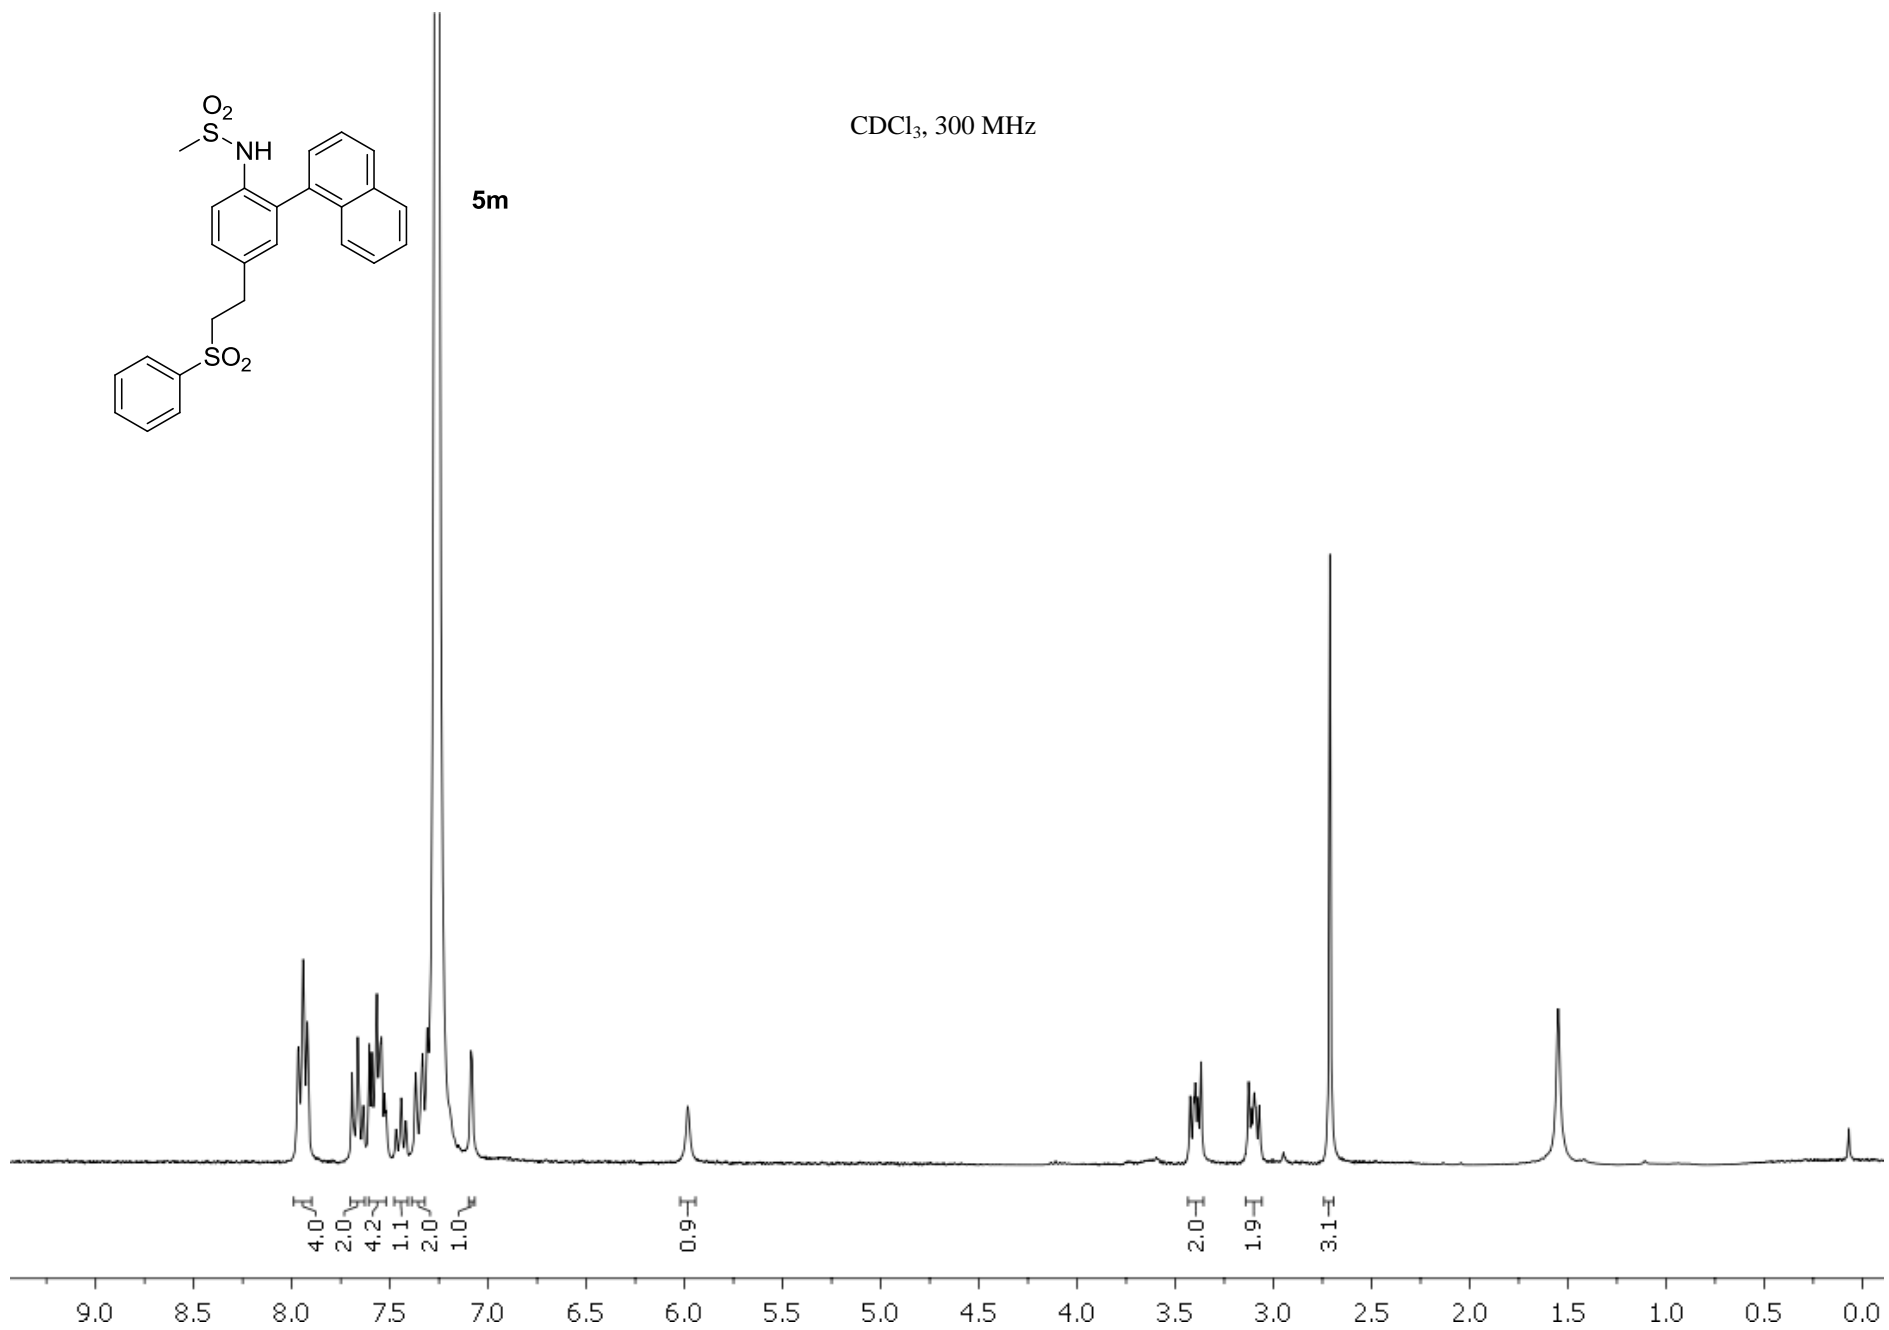



CDCl<sub>3</sub>, 75 MHz

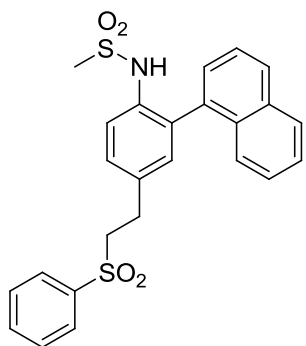

5m

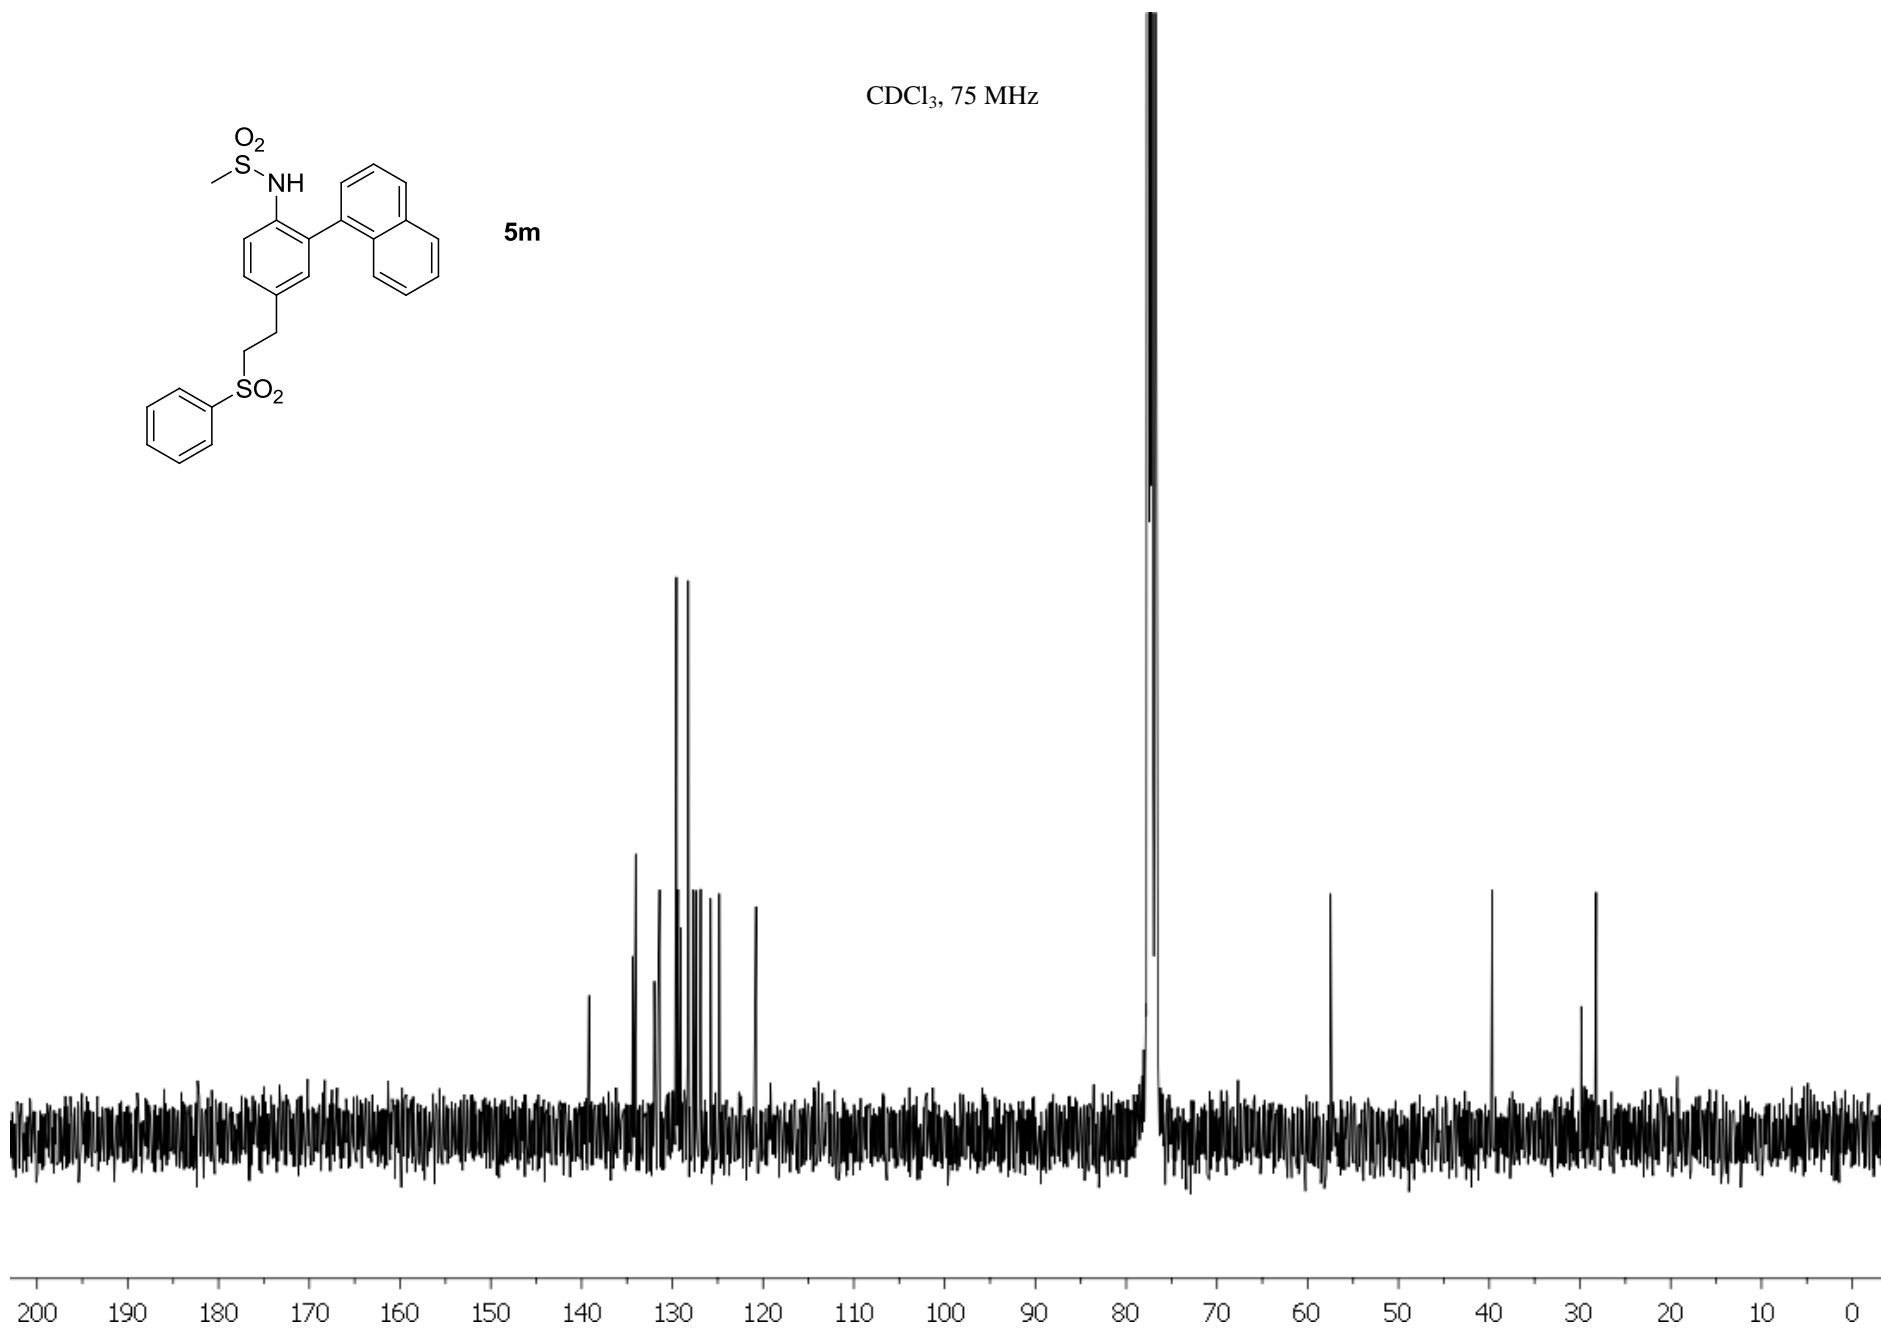

CDCl<sub>3</sub>, 300 MHz

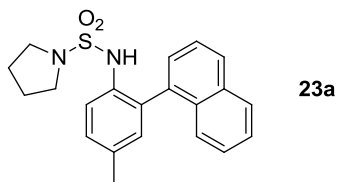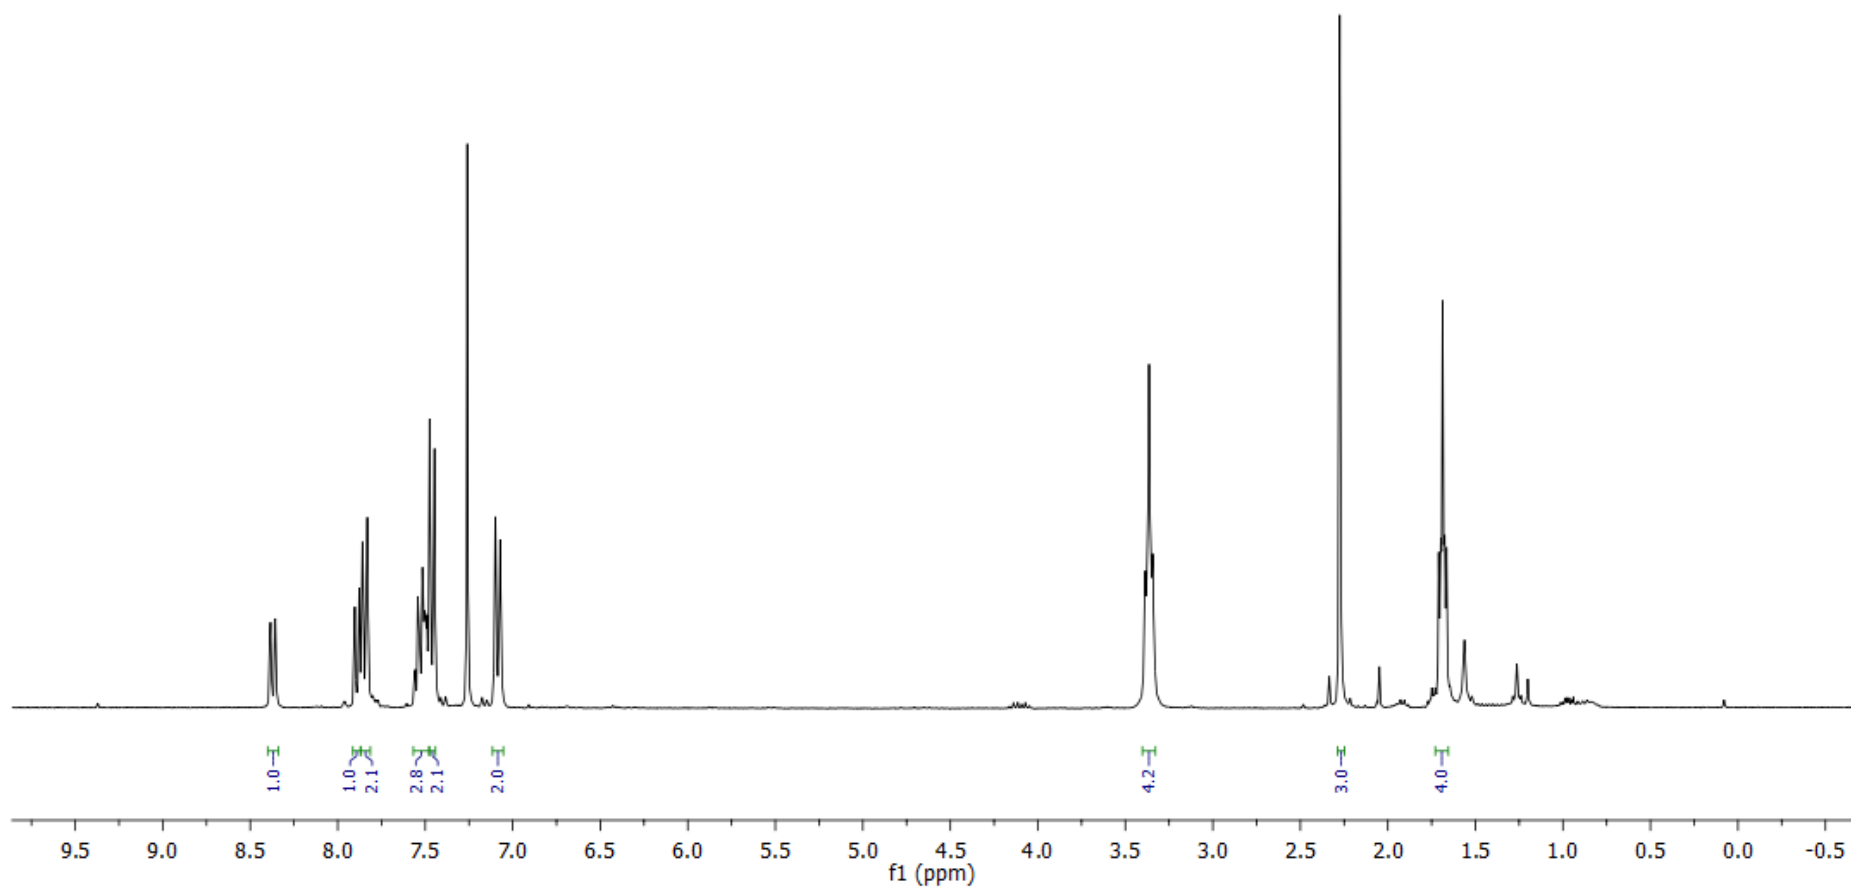

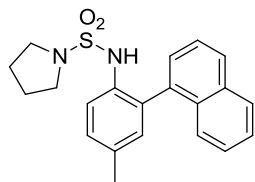

23a

CDCl<sub>3</sub>, 75 MHz

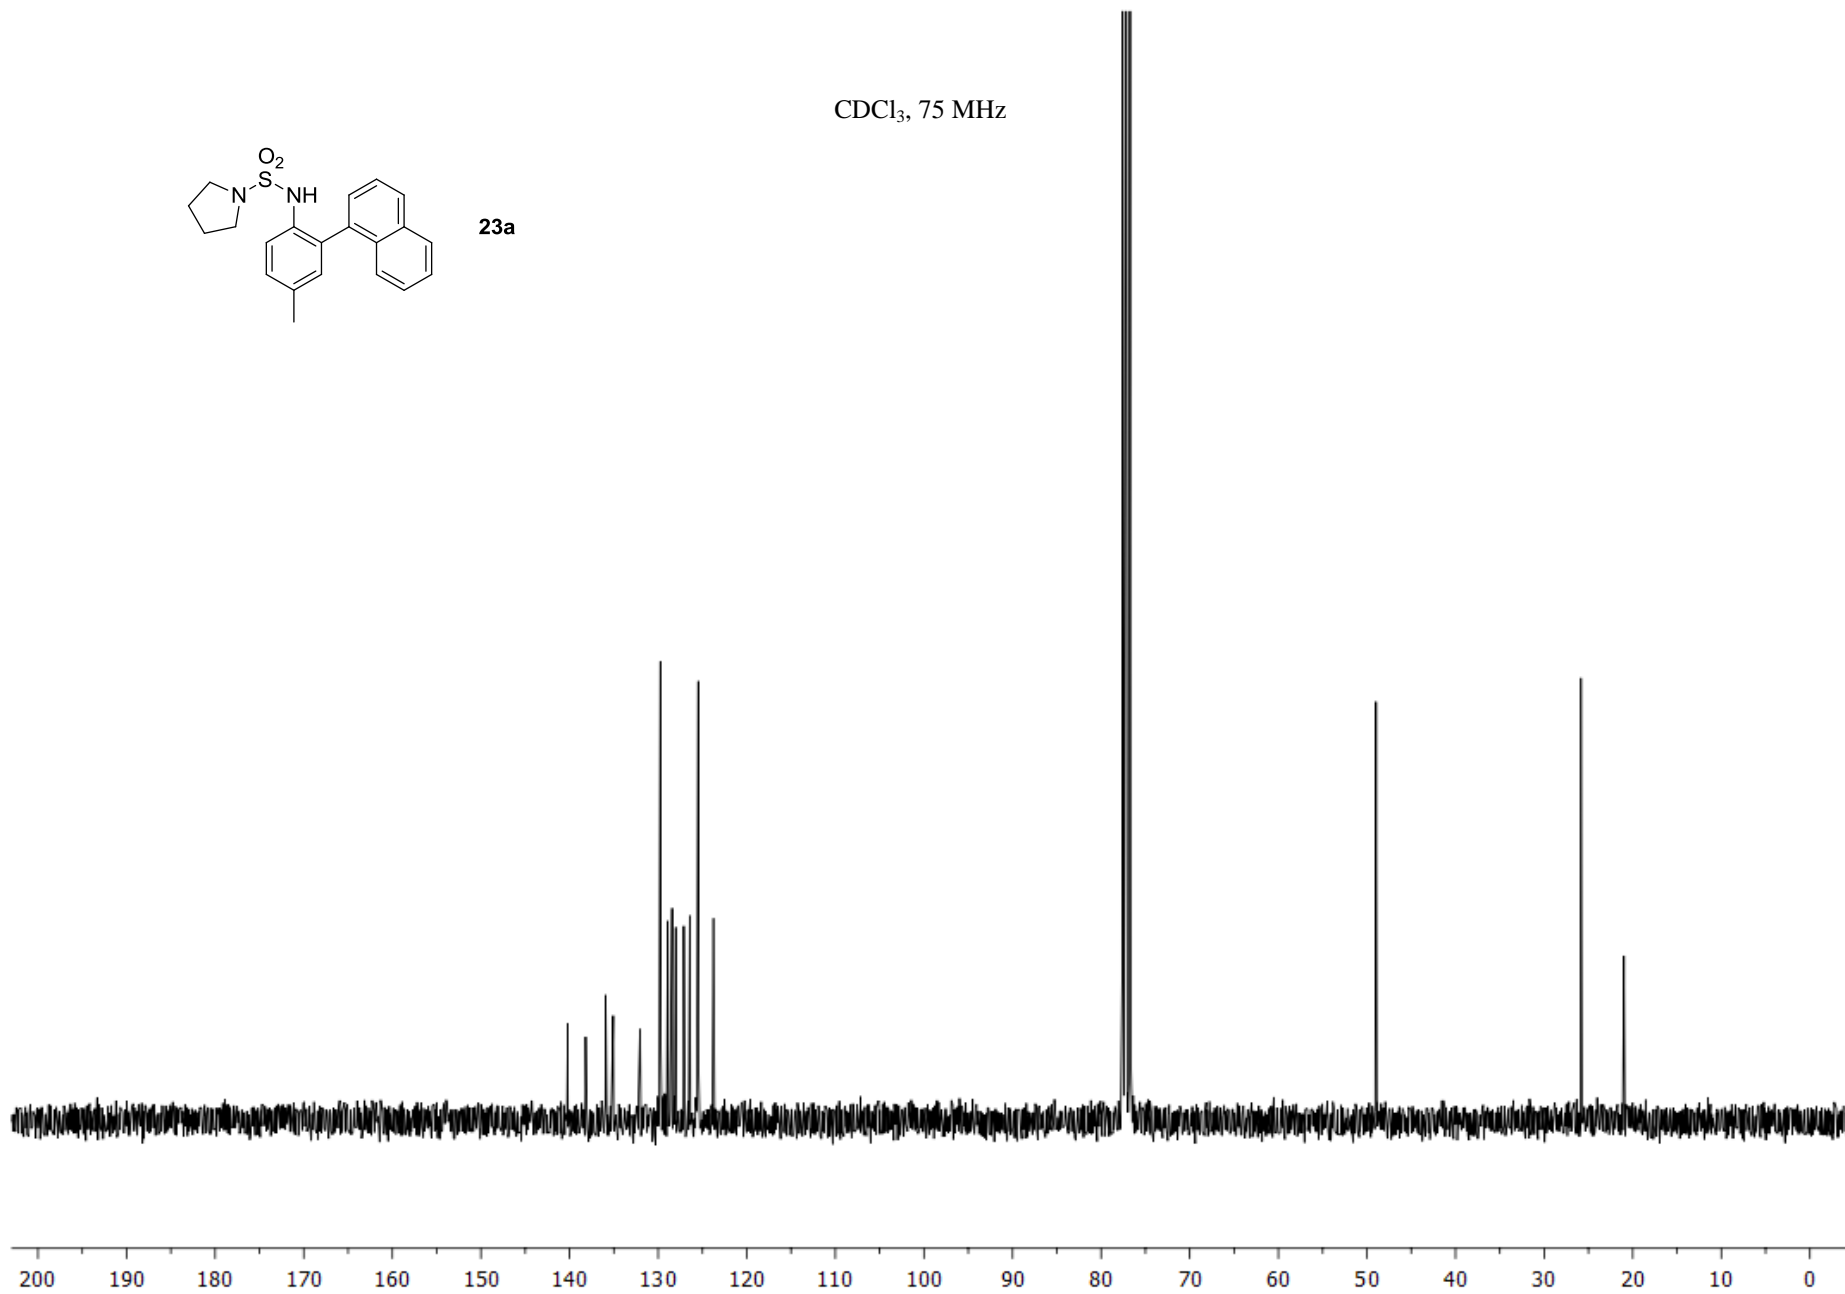

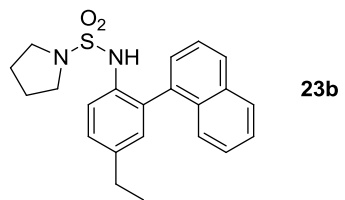

CDCl<sub>3</sub>, 300 MHz

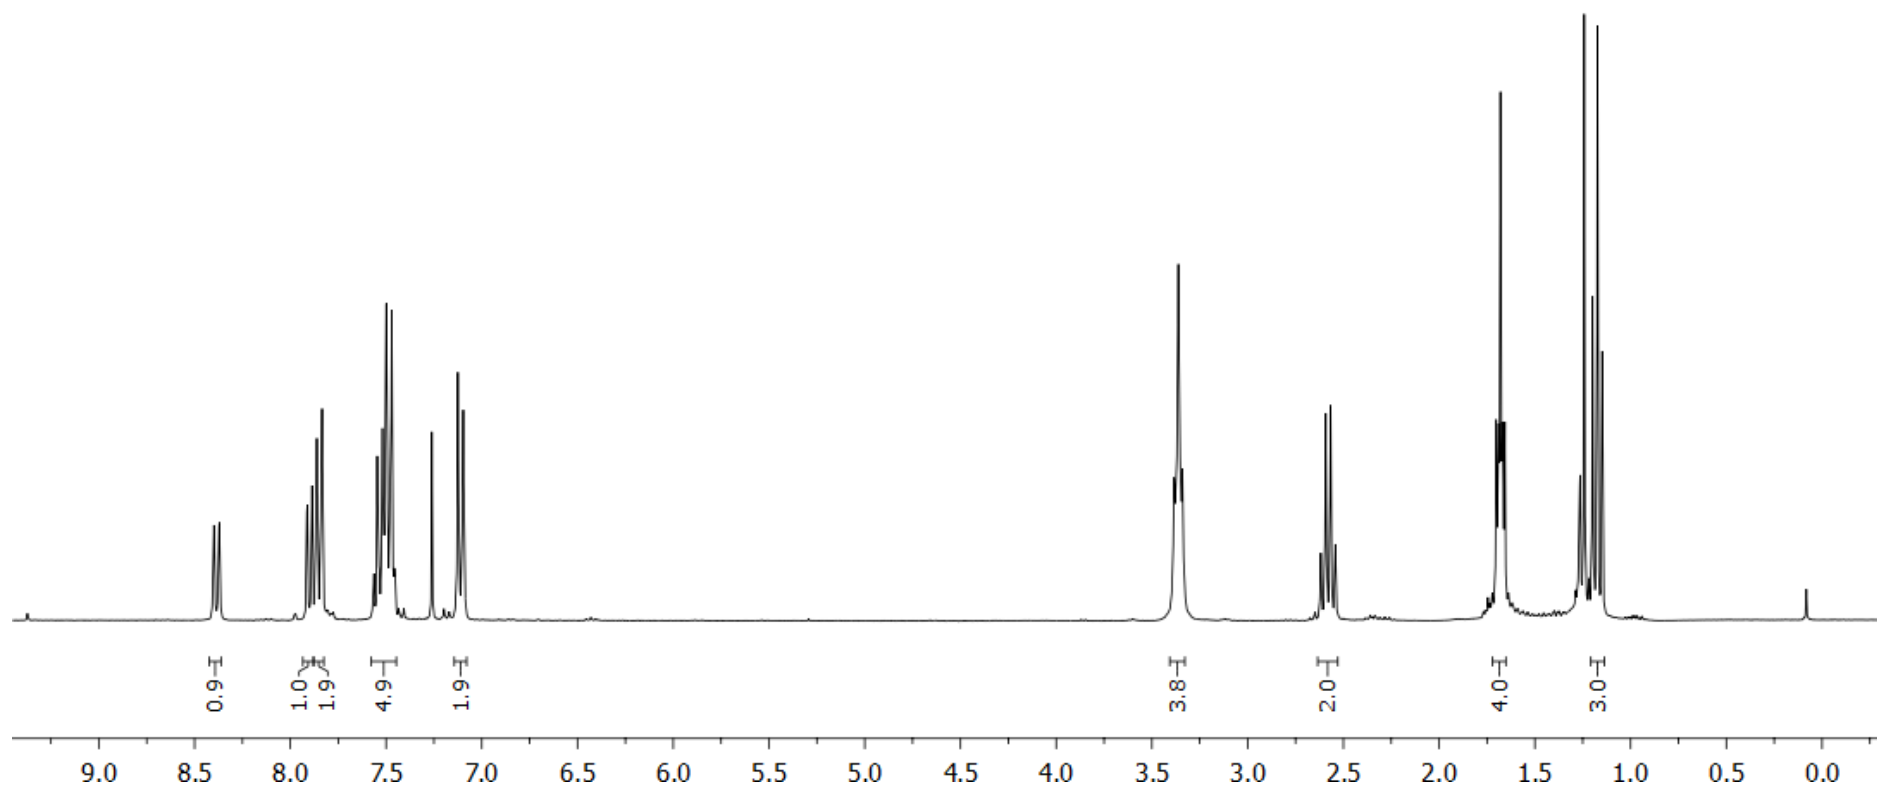

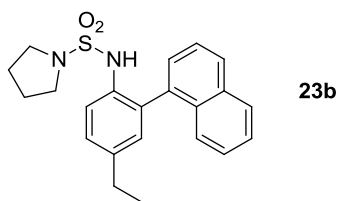

CDCl<sub>3</sub>, 75 MHz

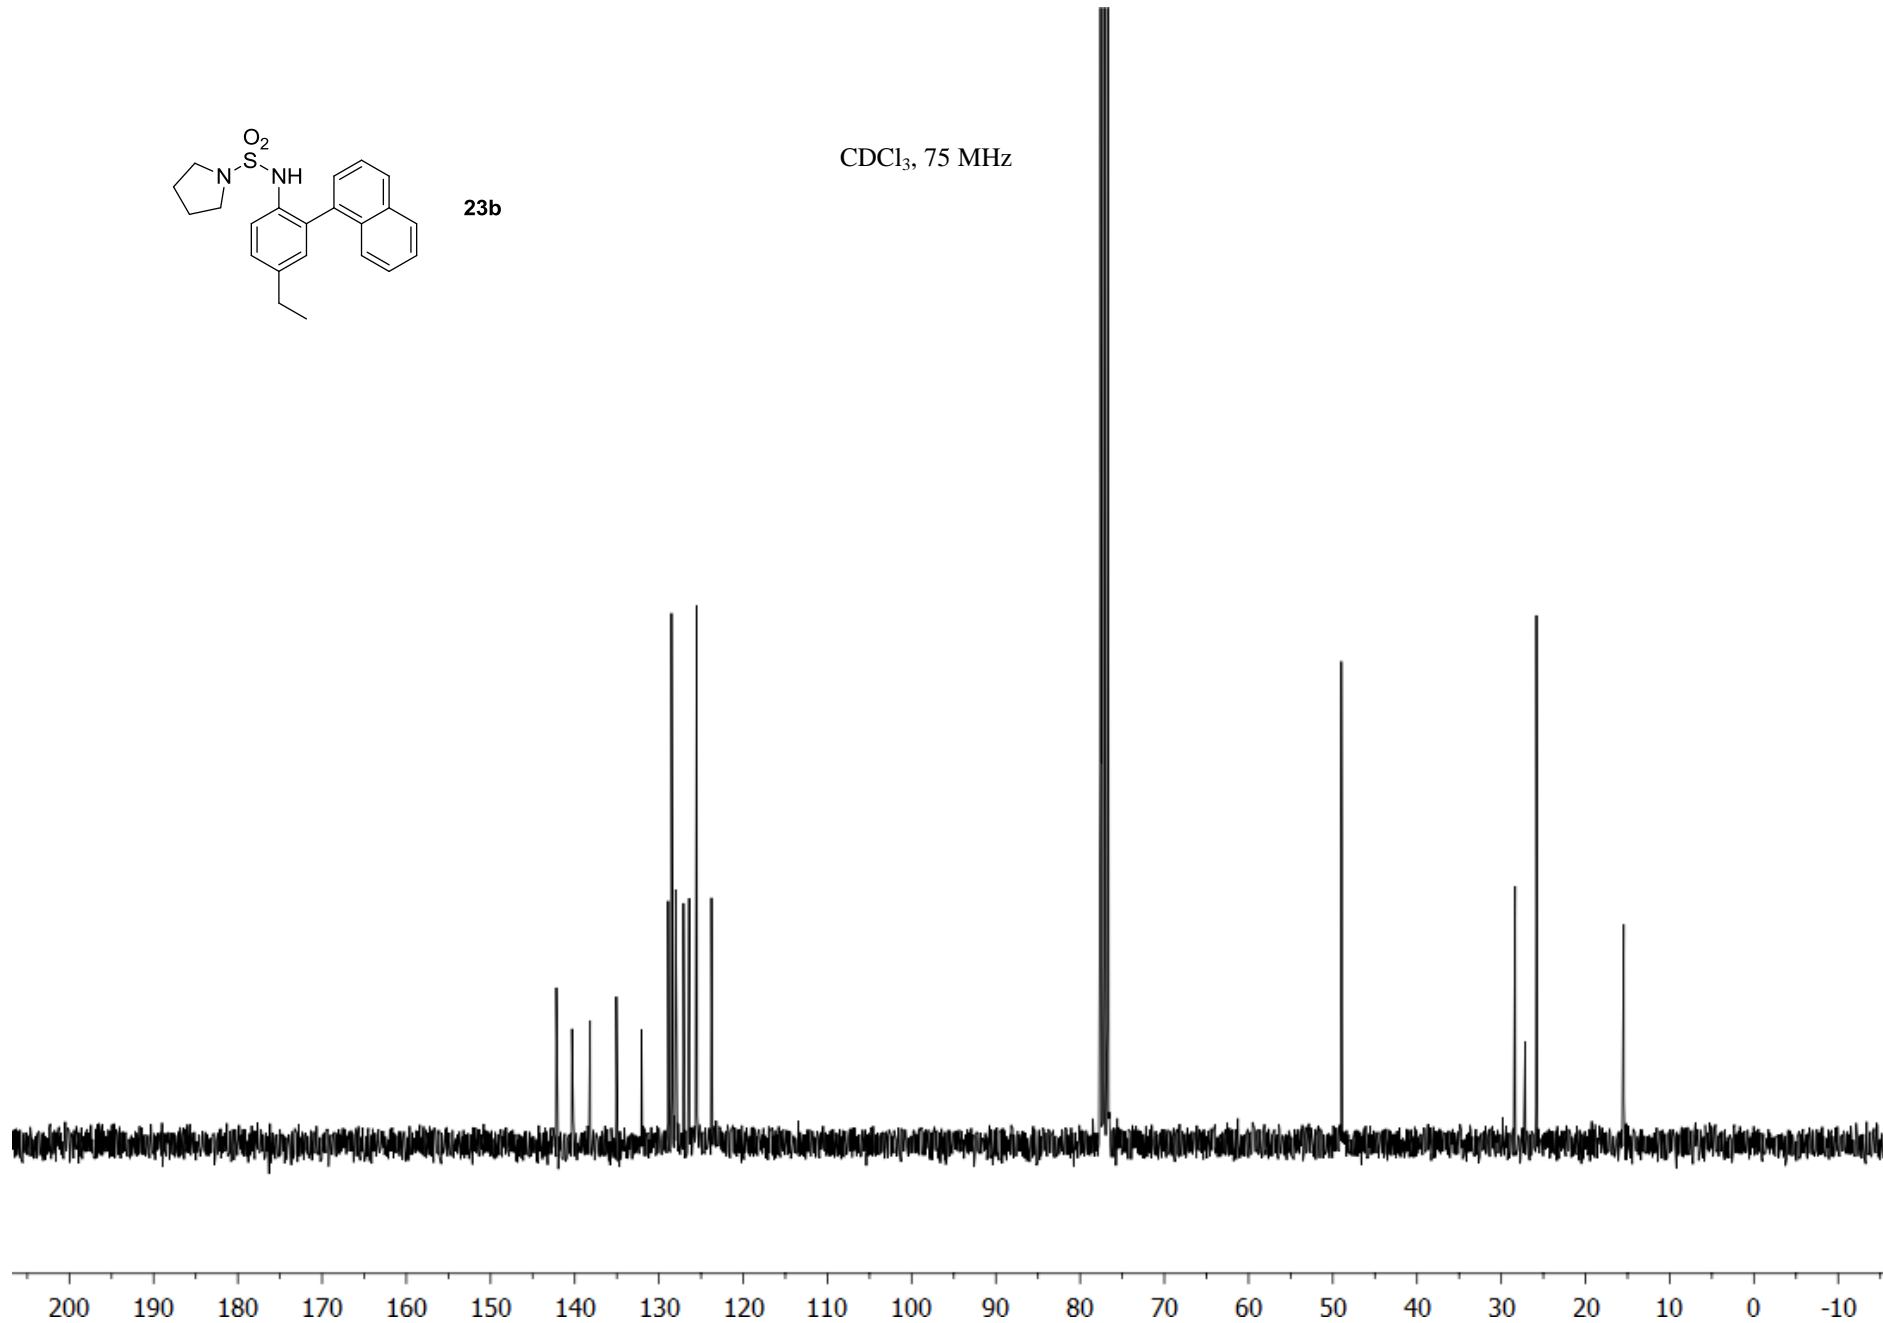

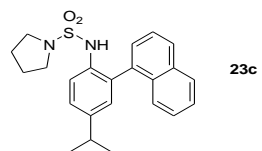

CDCl<sub>3</sub>, 300 MHz

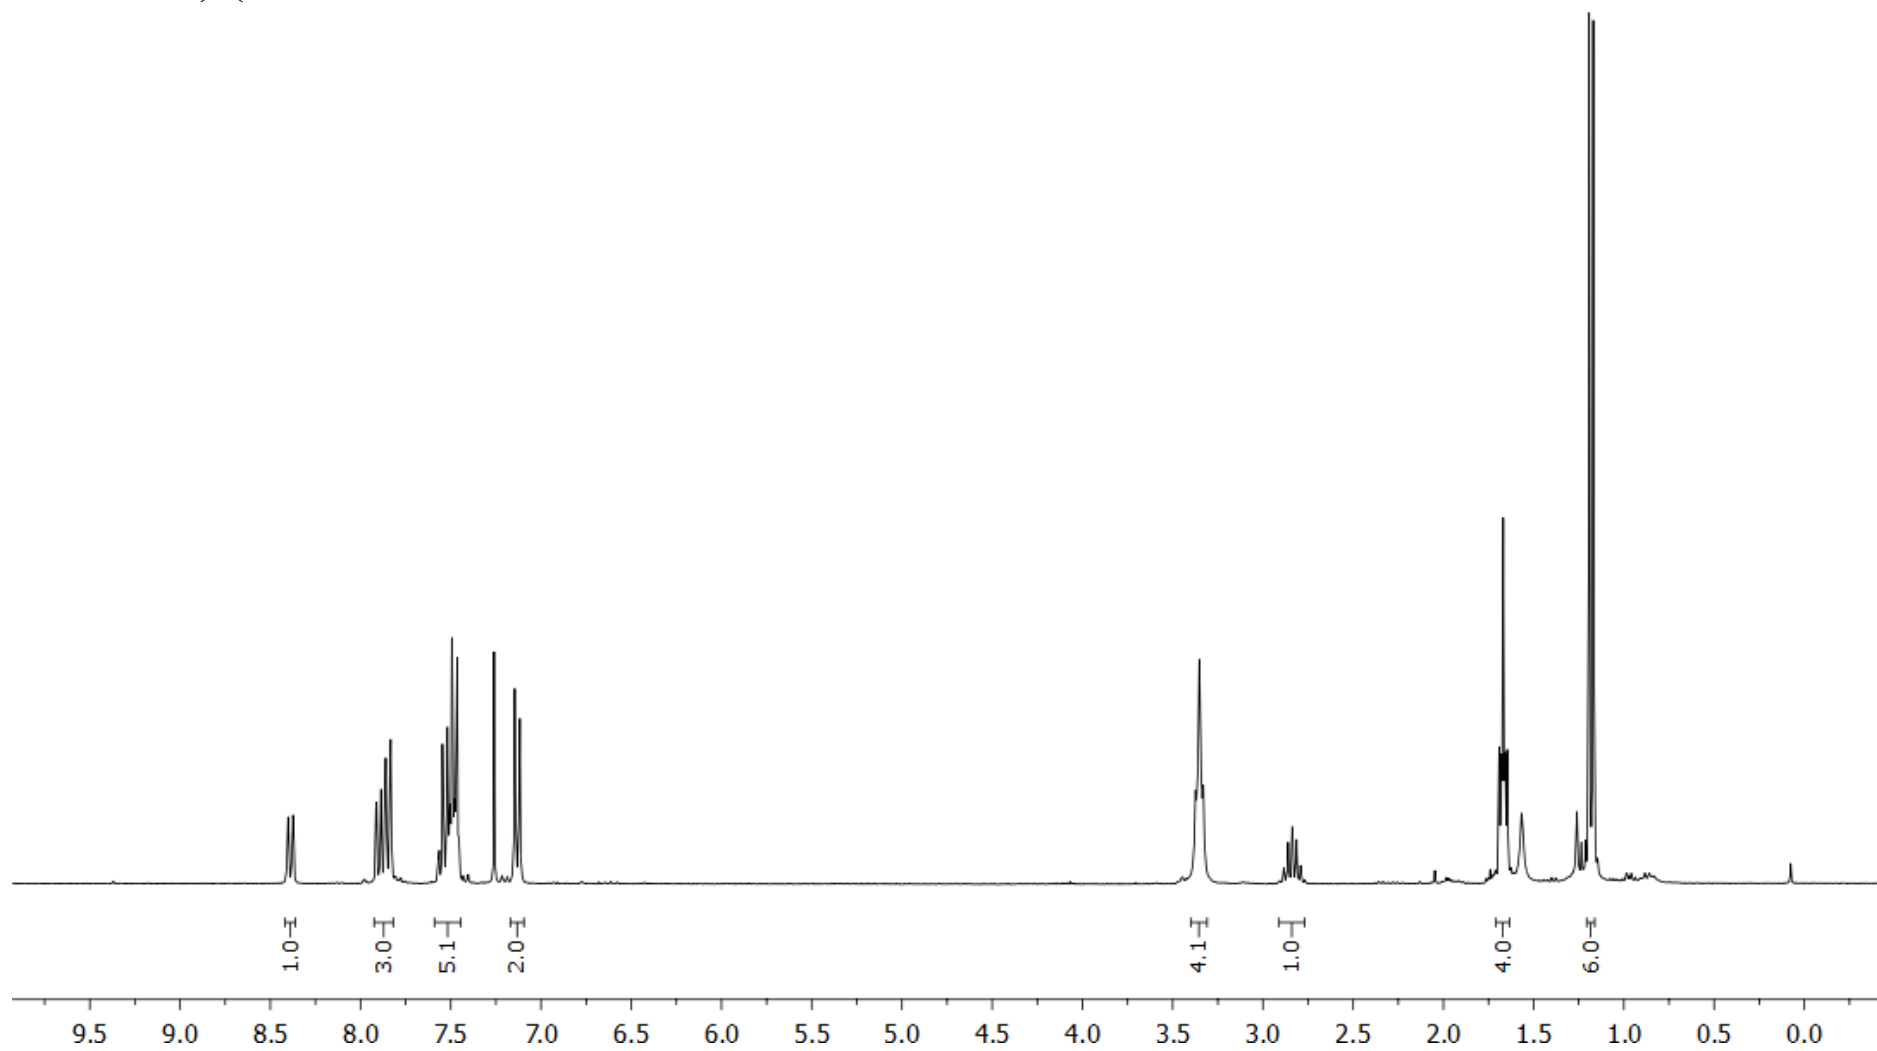

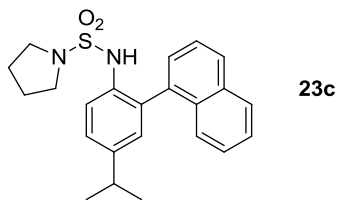

CDCl<sub>3</sub>, 75 MHz

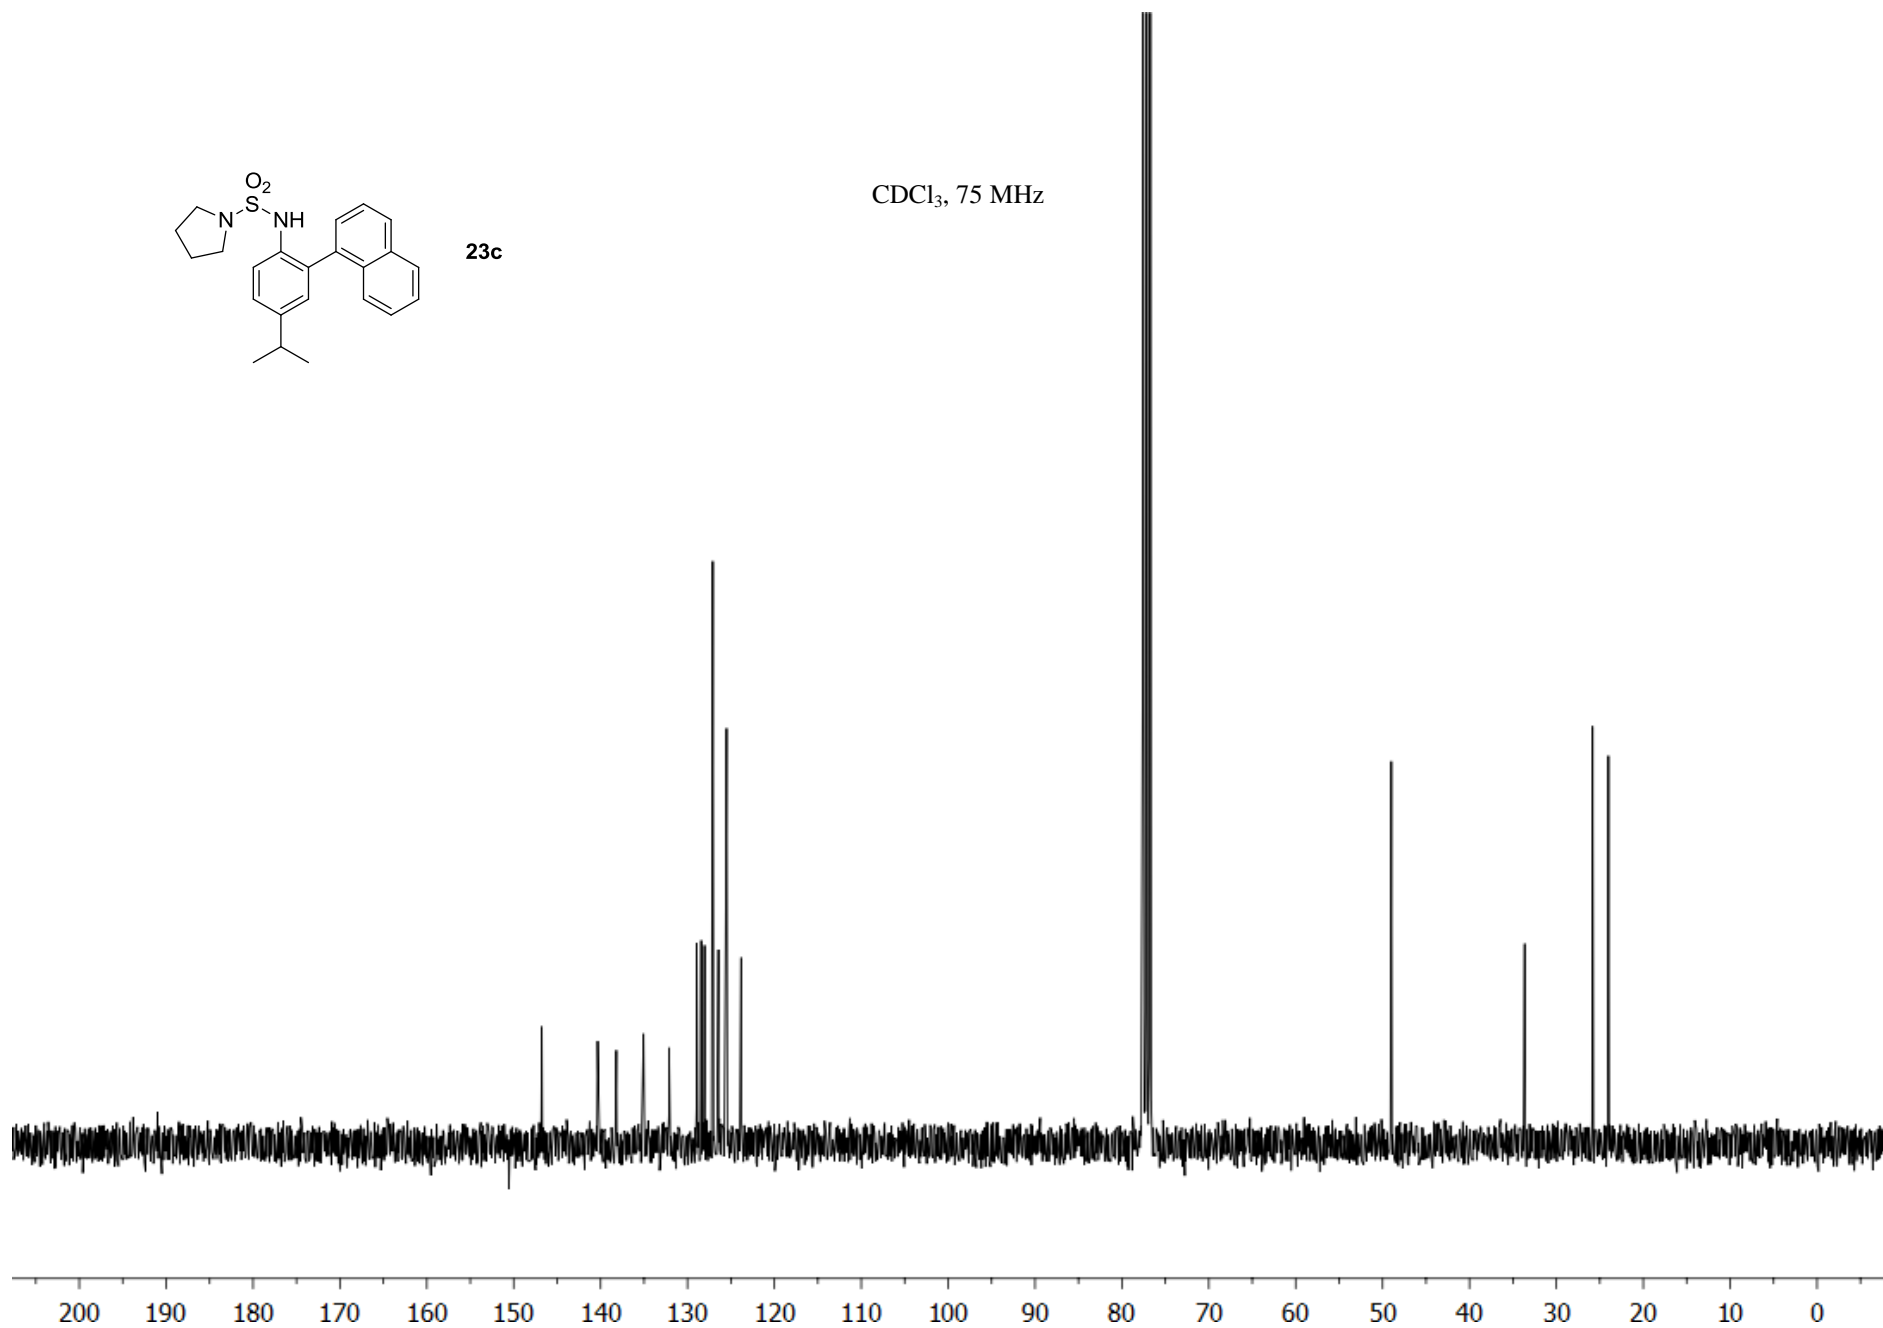

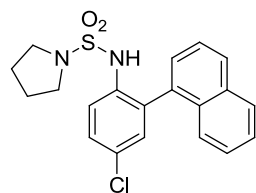

23d

CDCl<sub>3</sub>, 300 MHz

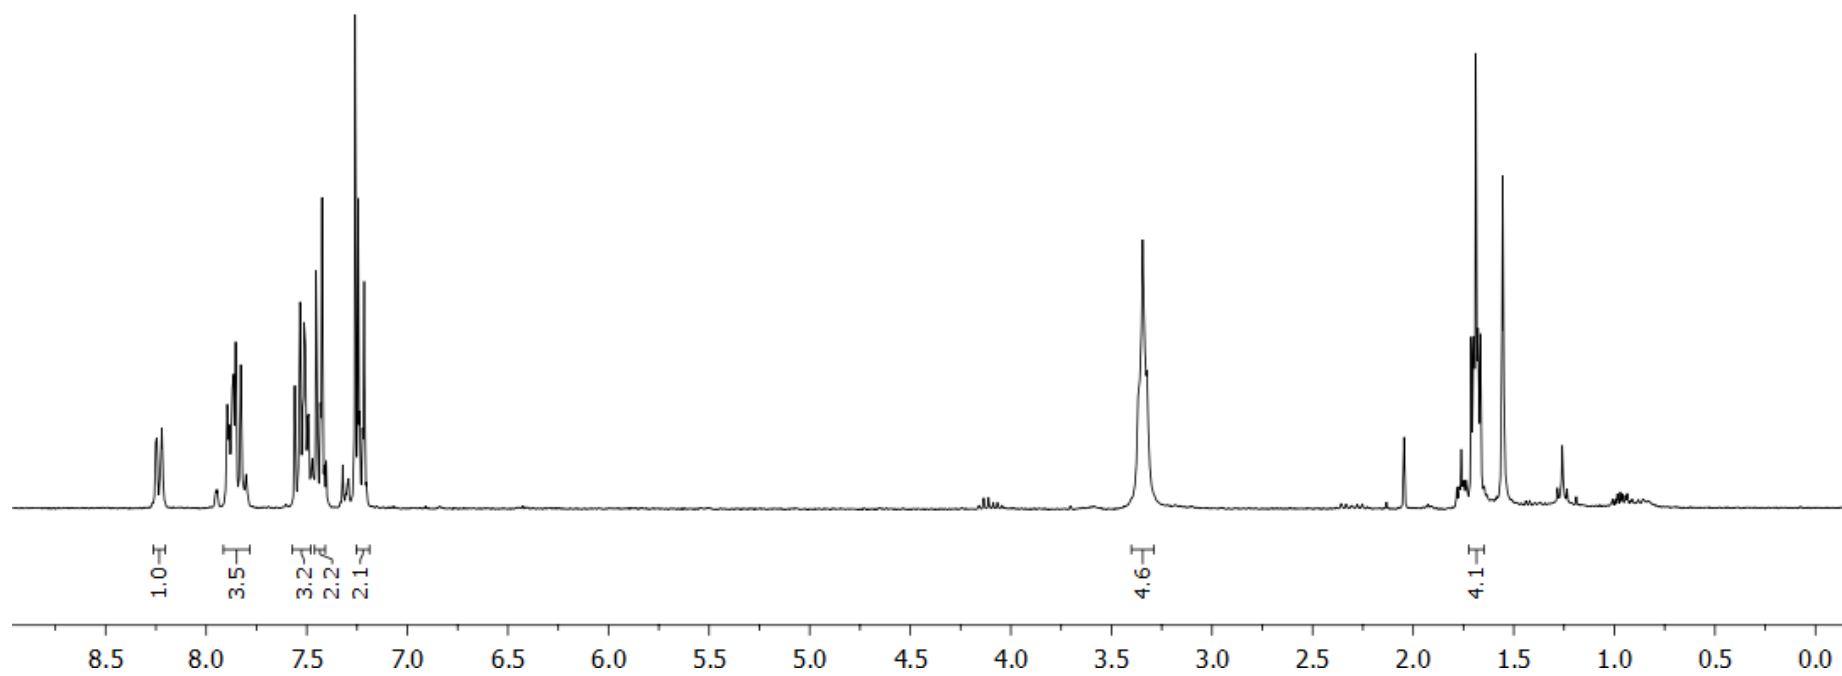



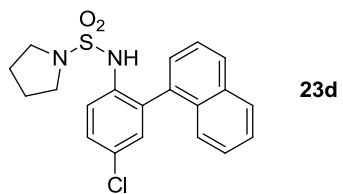

CDCl<sub>3</sub>, 75 MHz

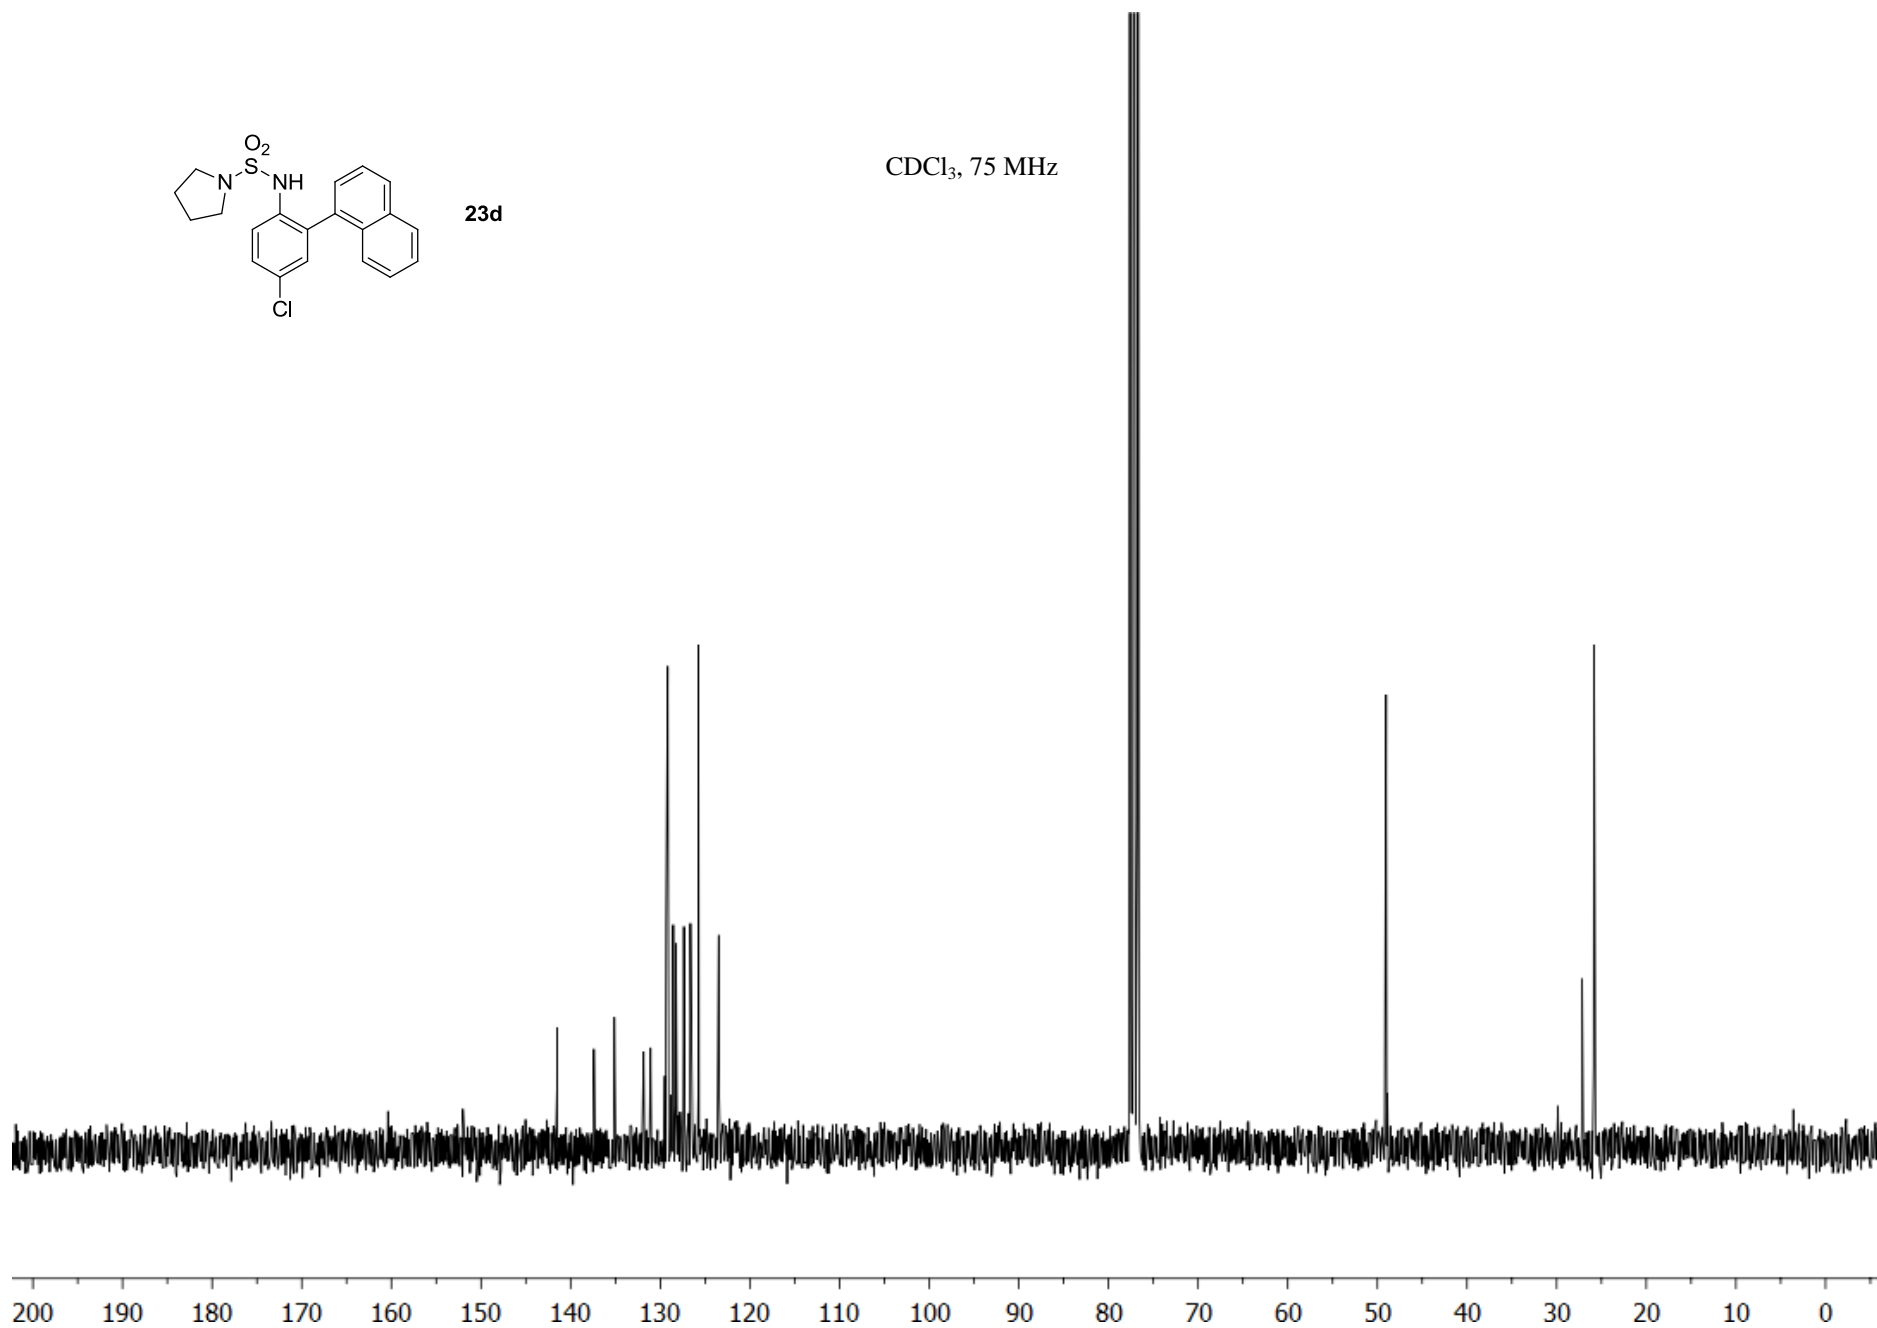

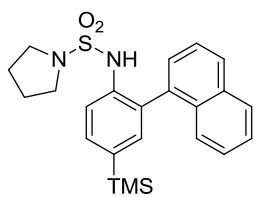

23e

CDCl<sub>3</sub>, 300 MHz

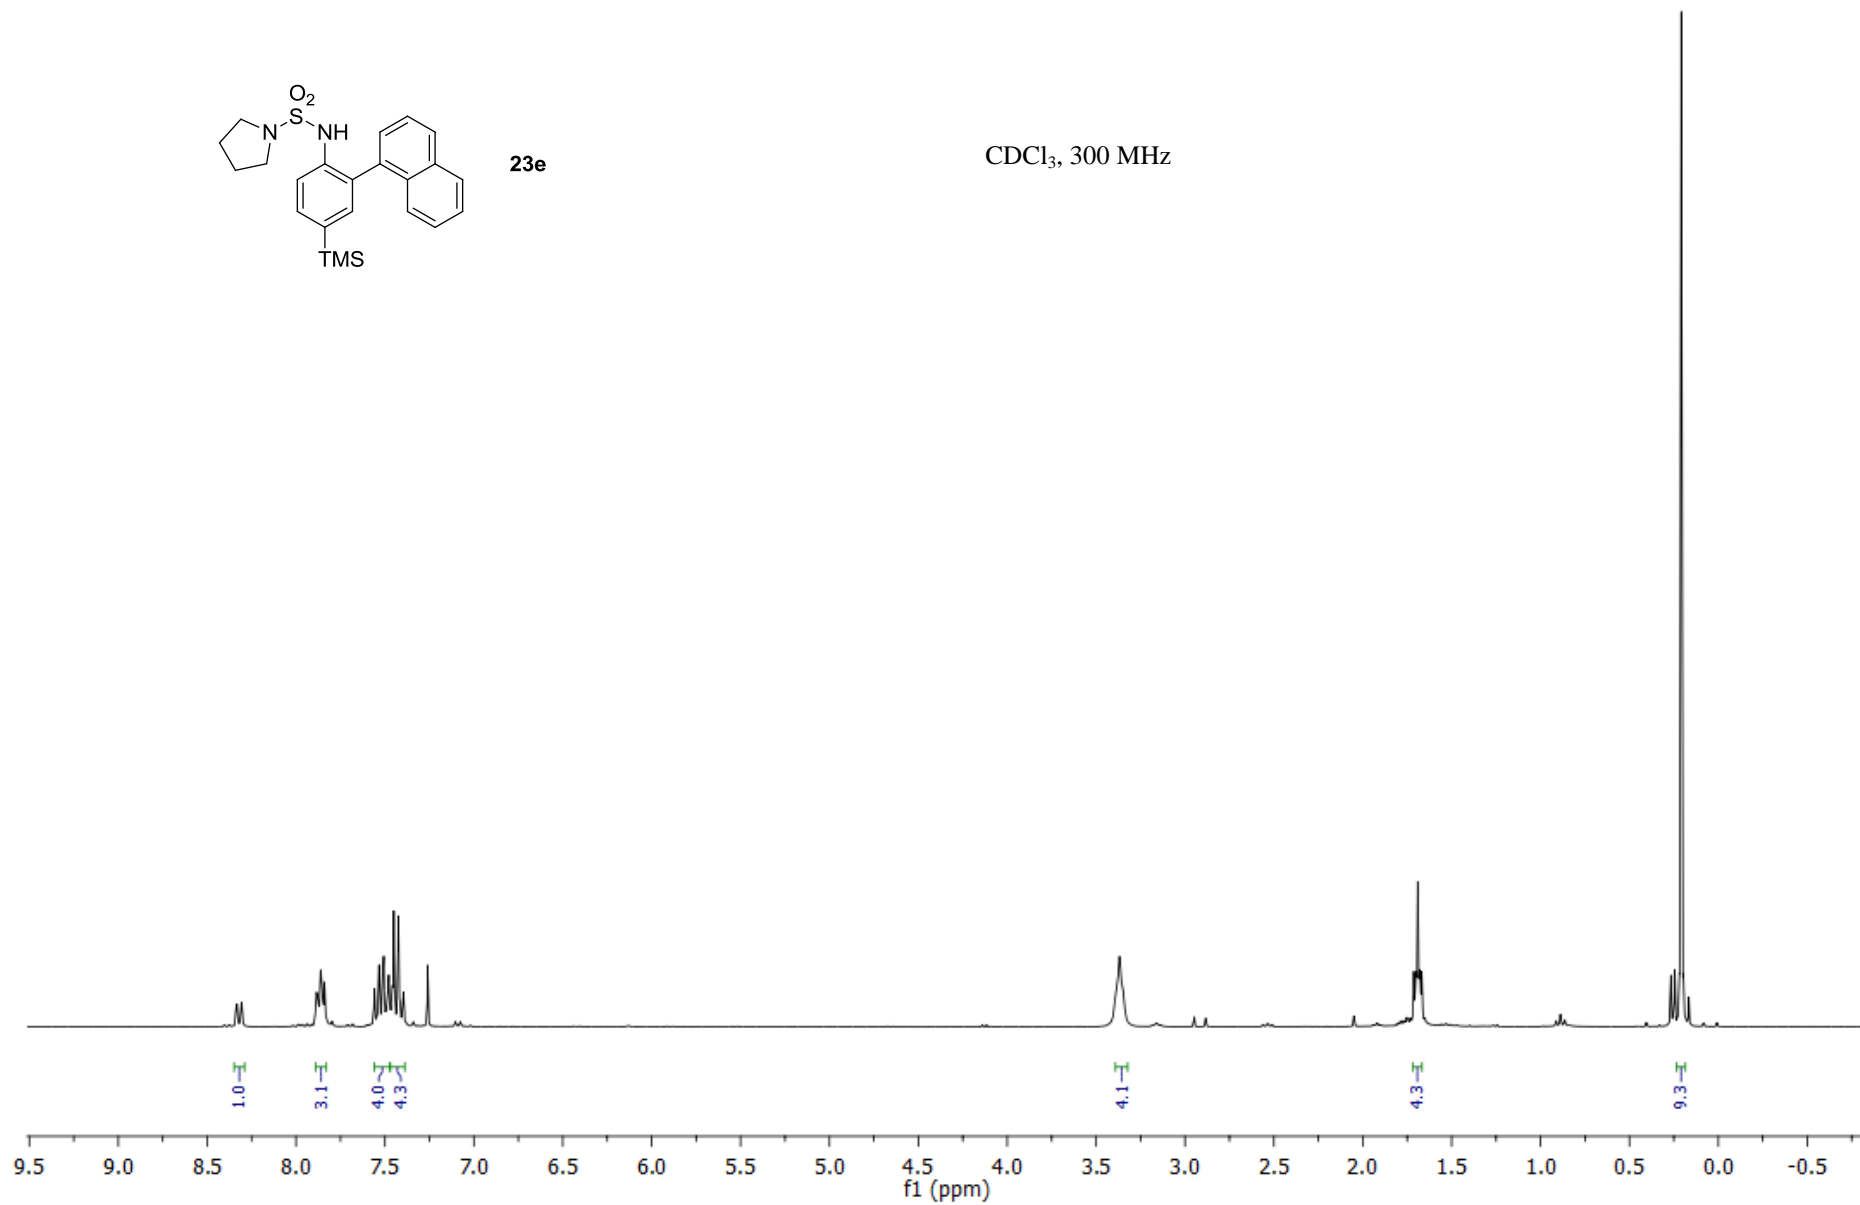

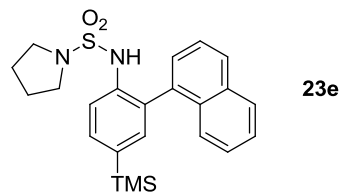

CDCl<sub>3</sub>, 75 MHz

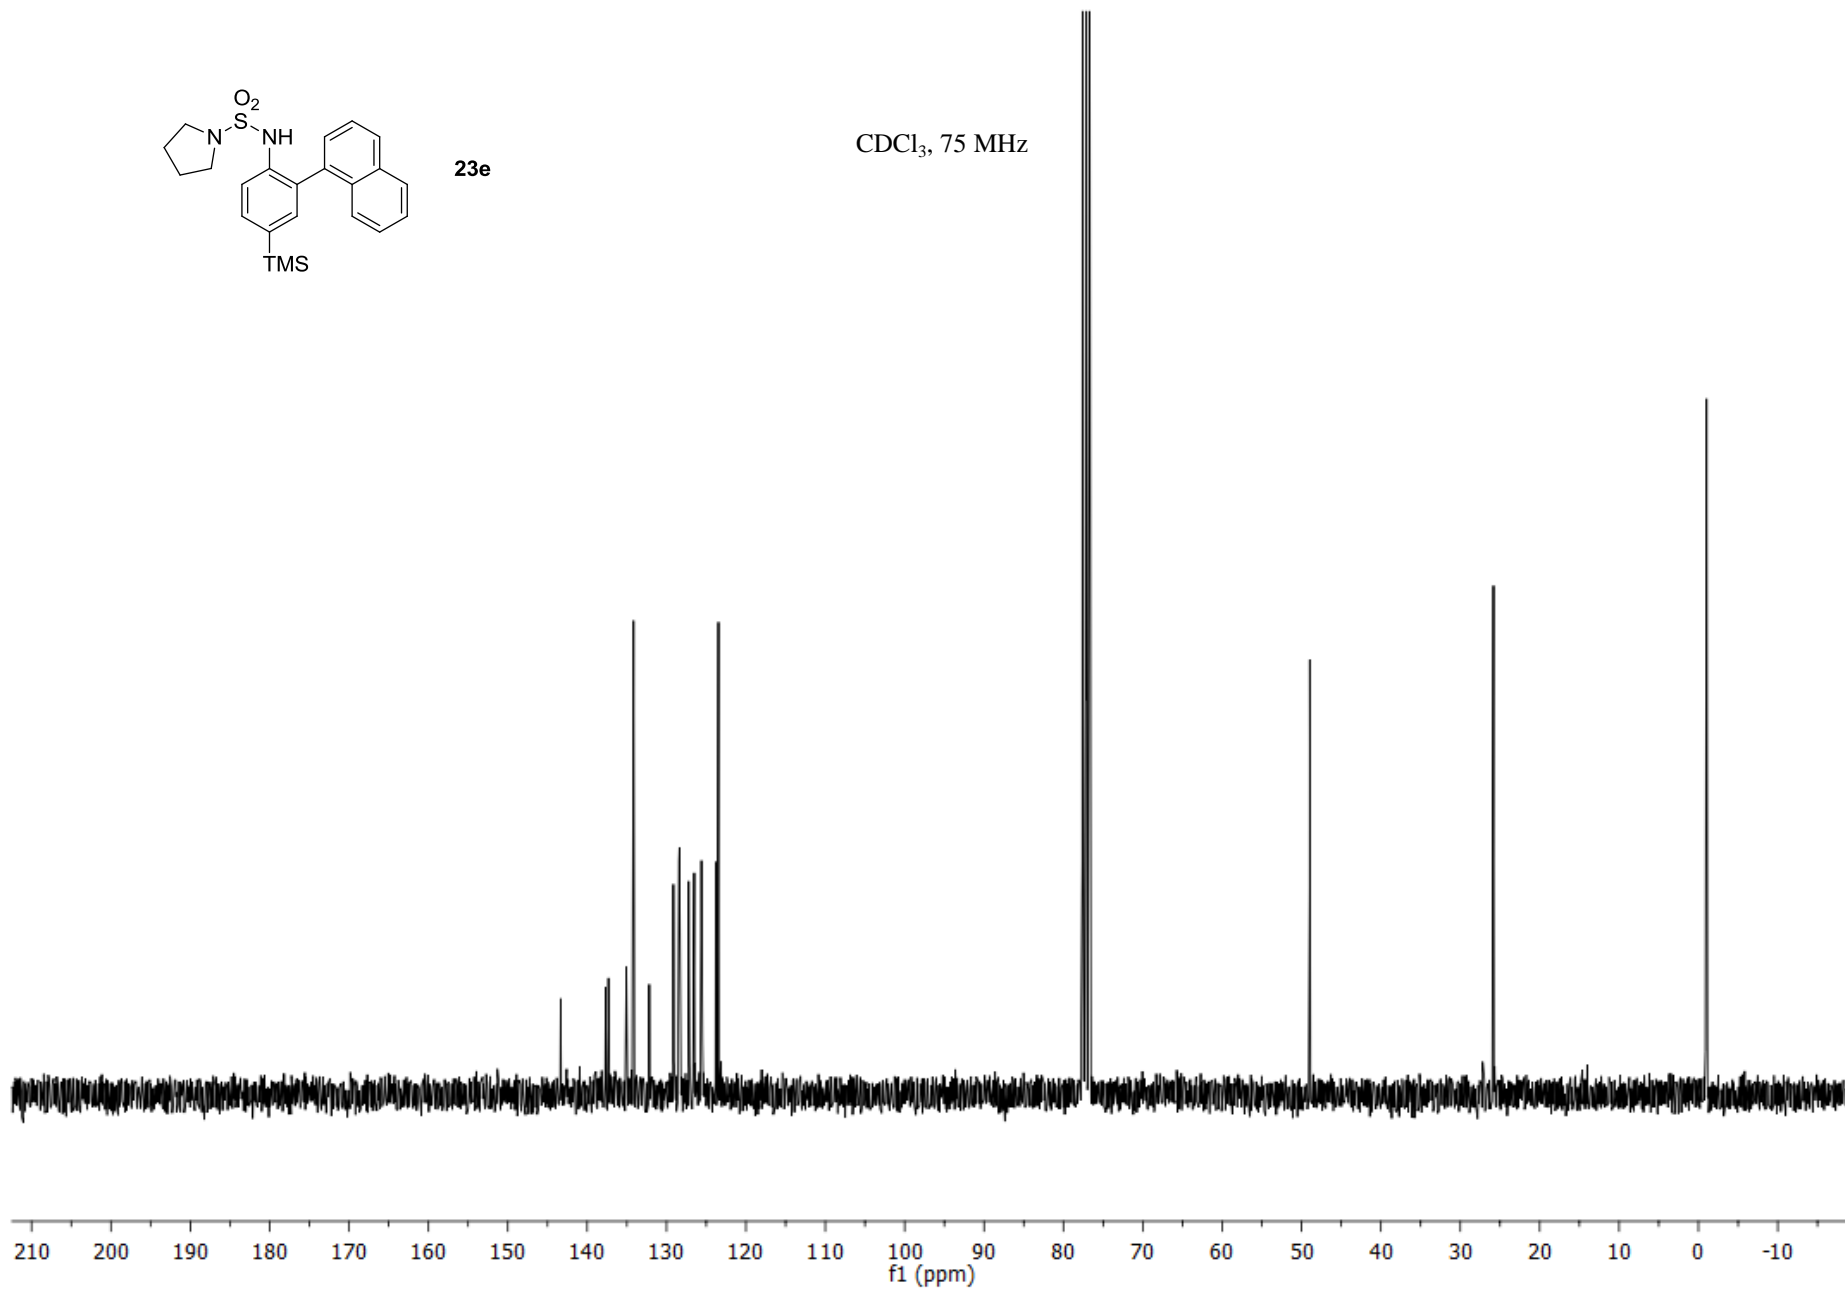

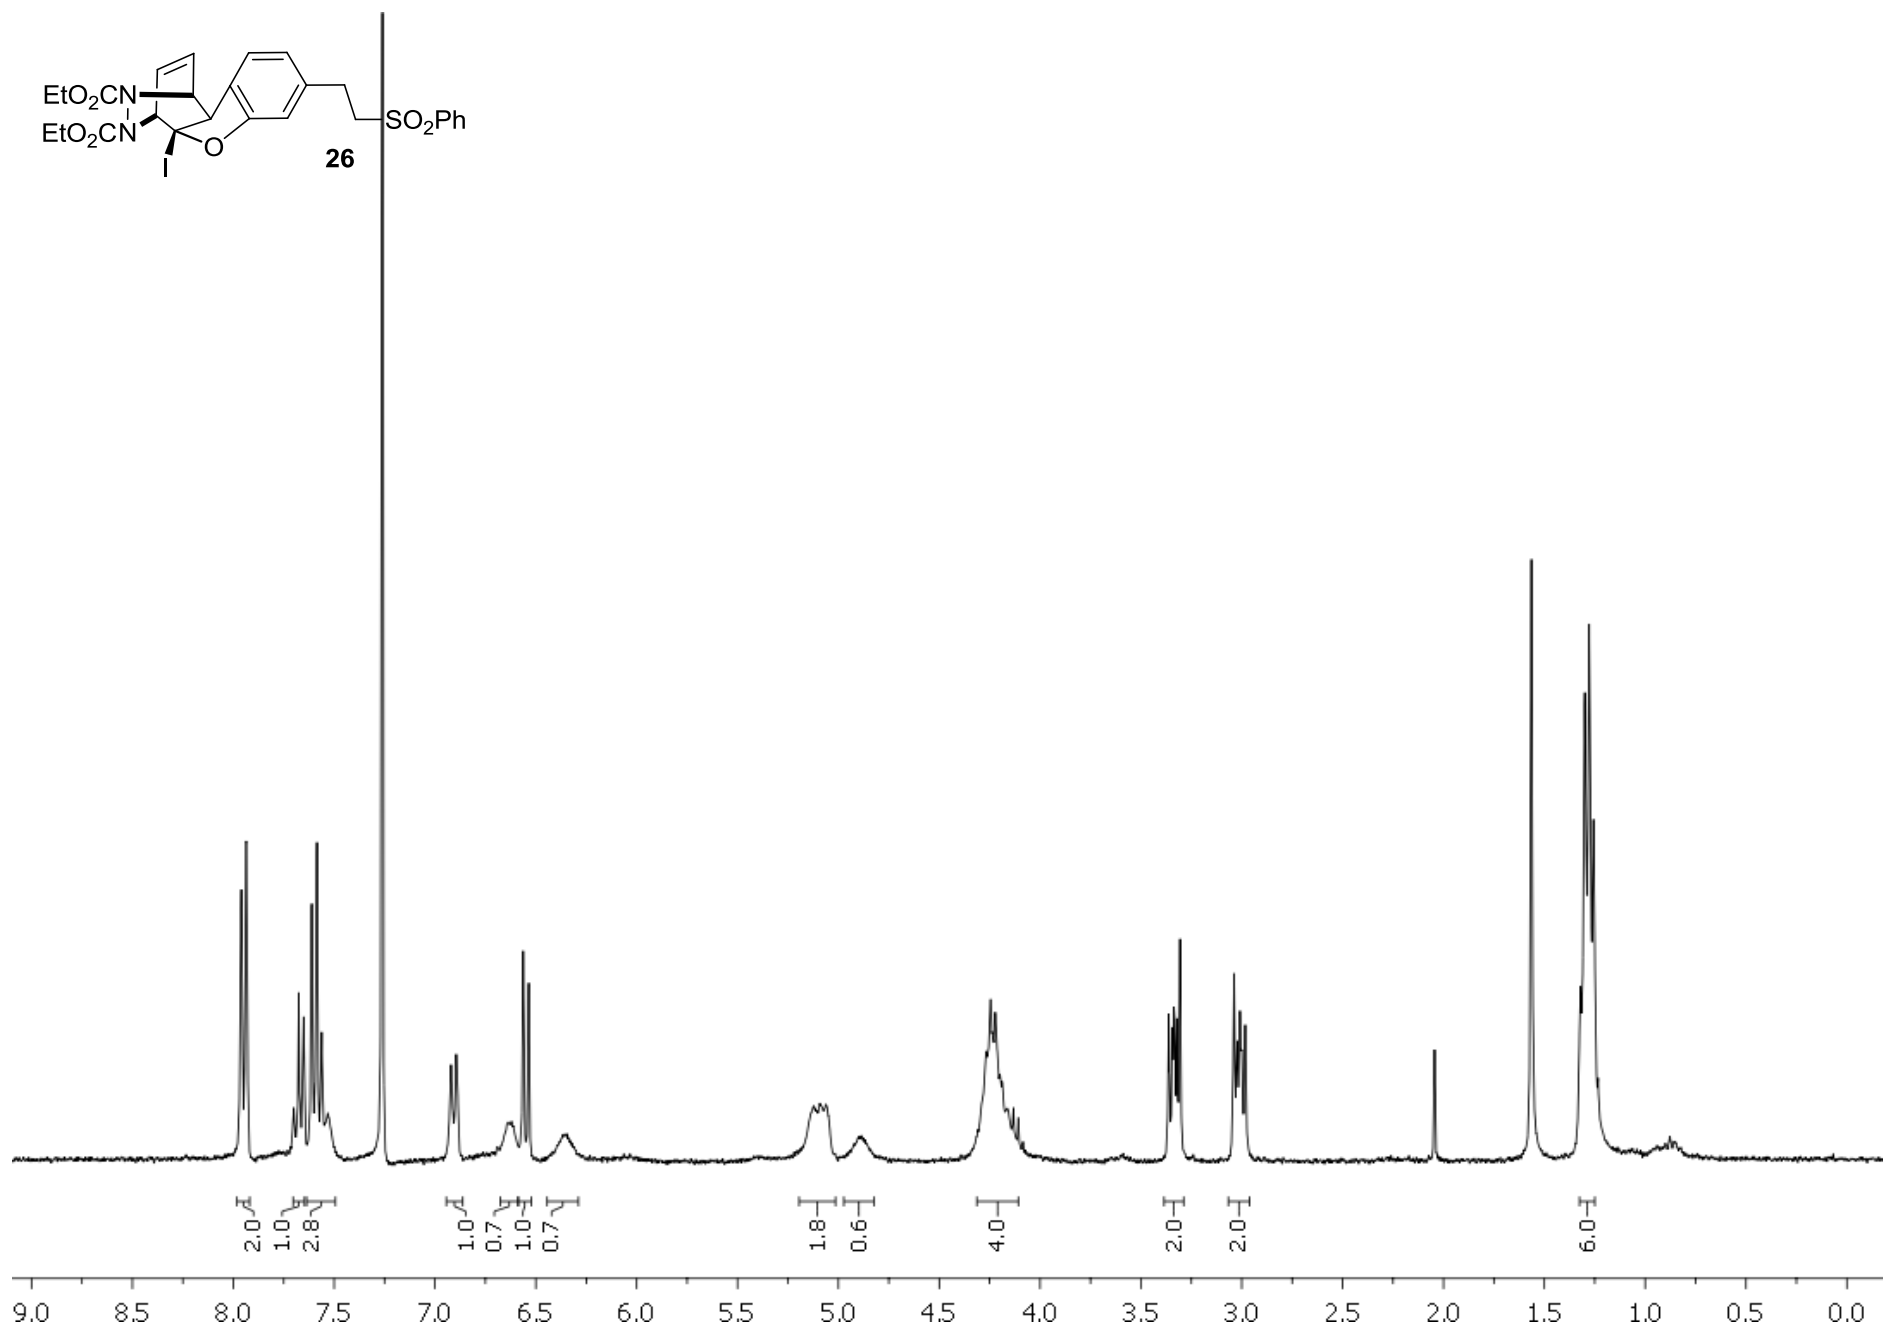

CDCl<sub>3</sub>, 75 MHz

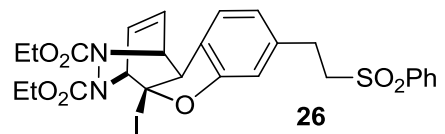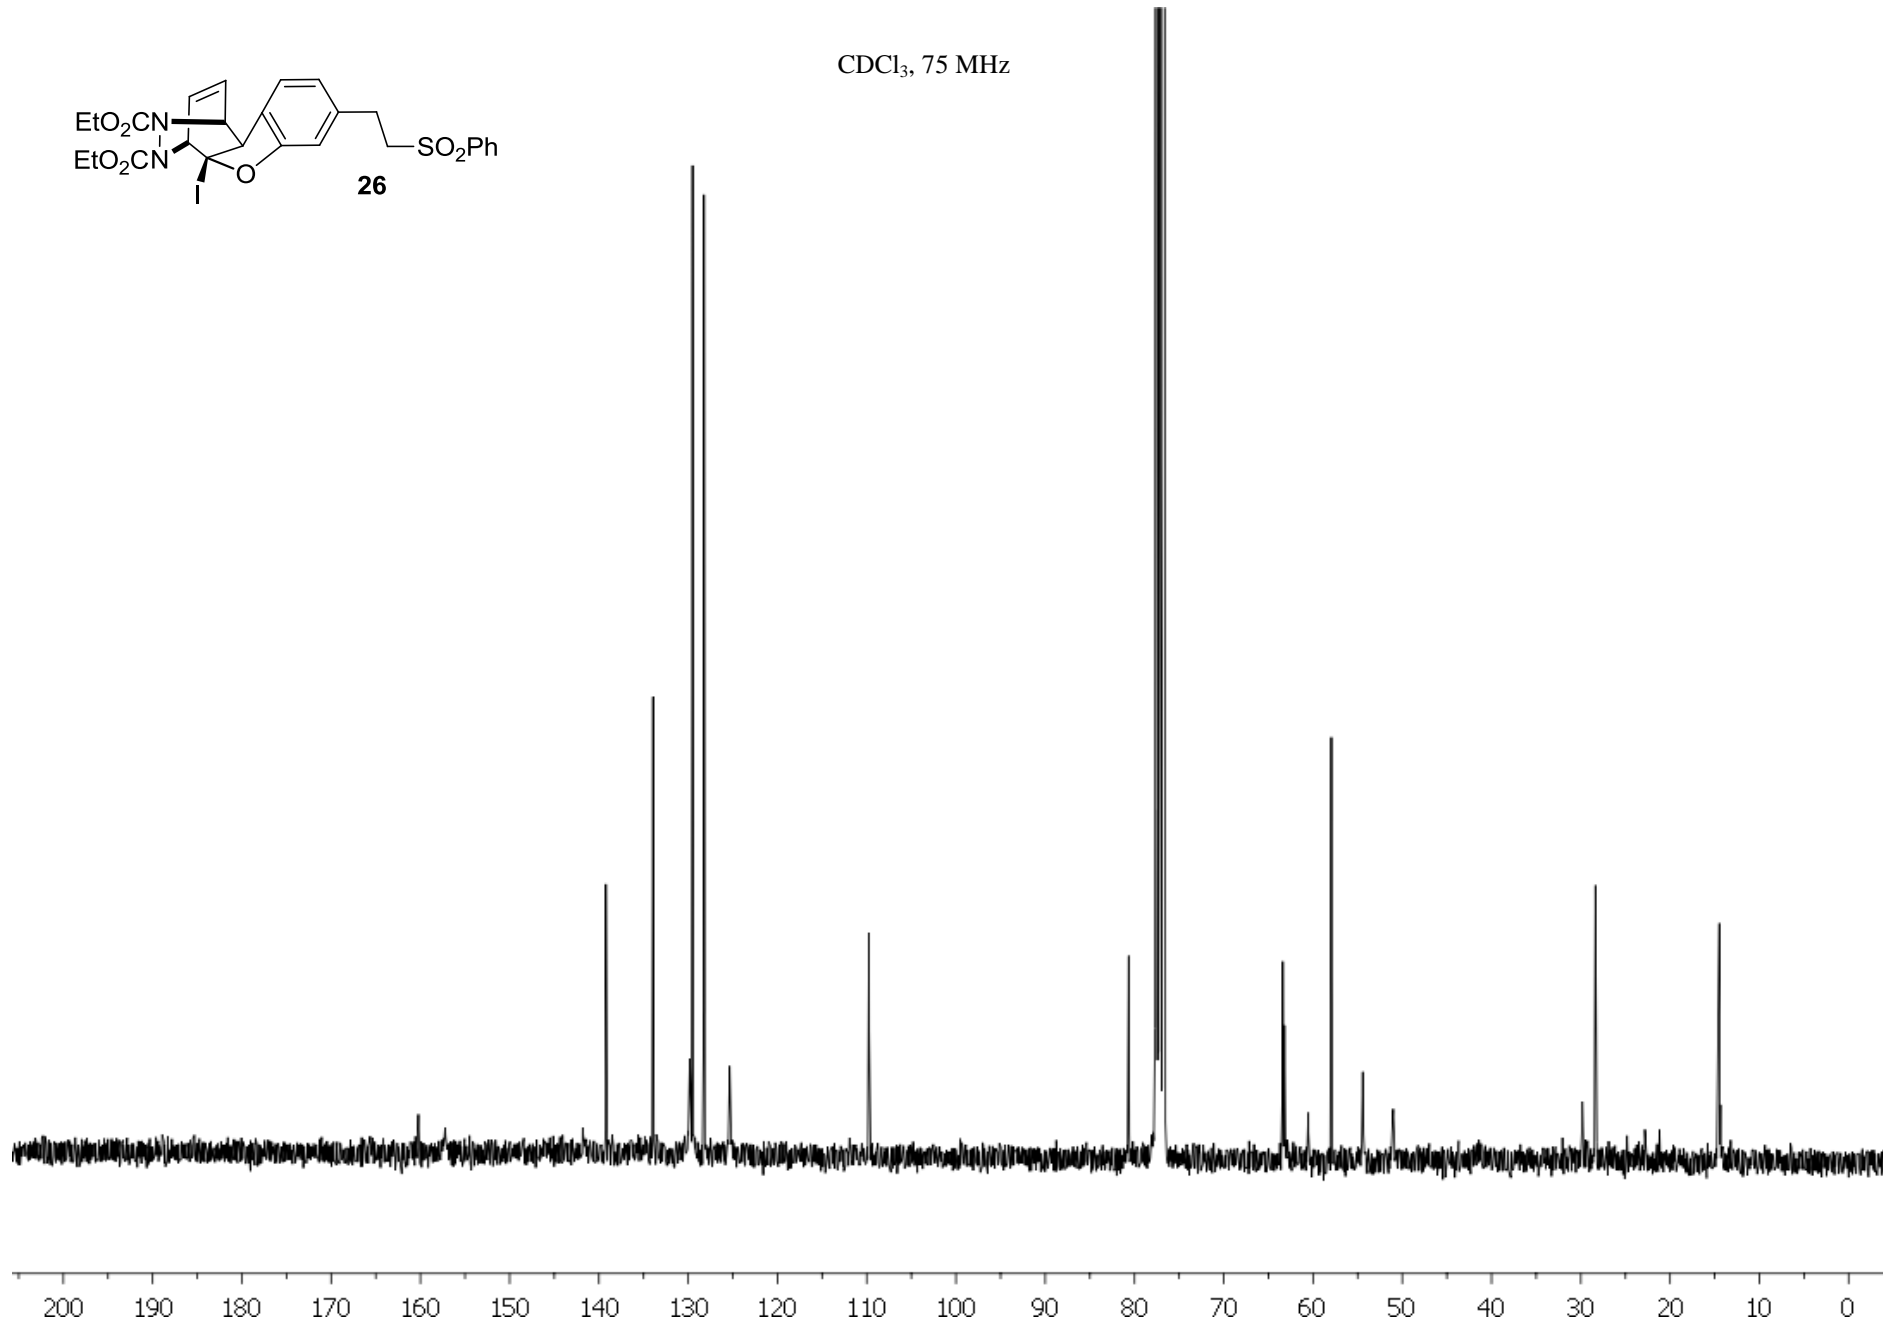

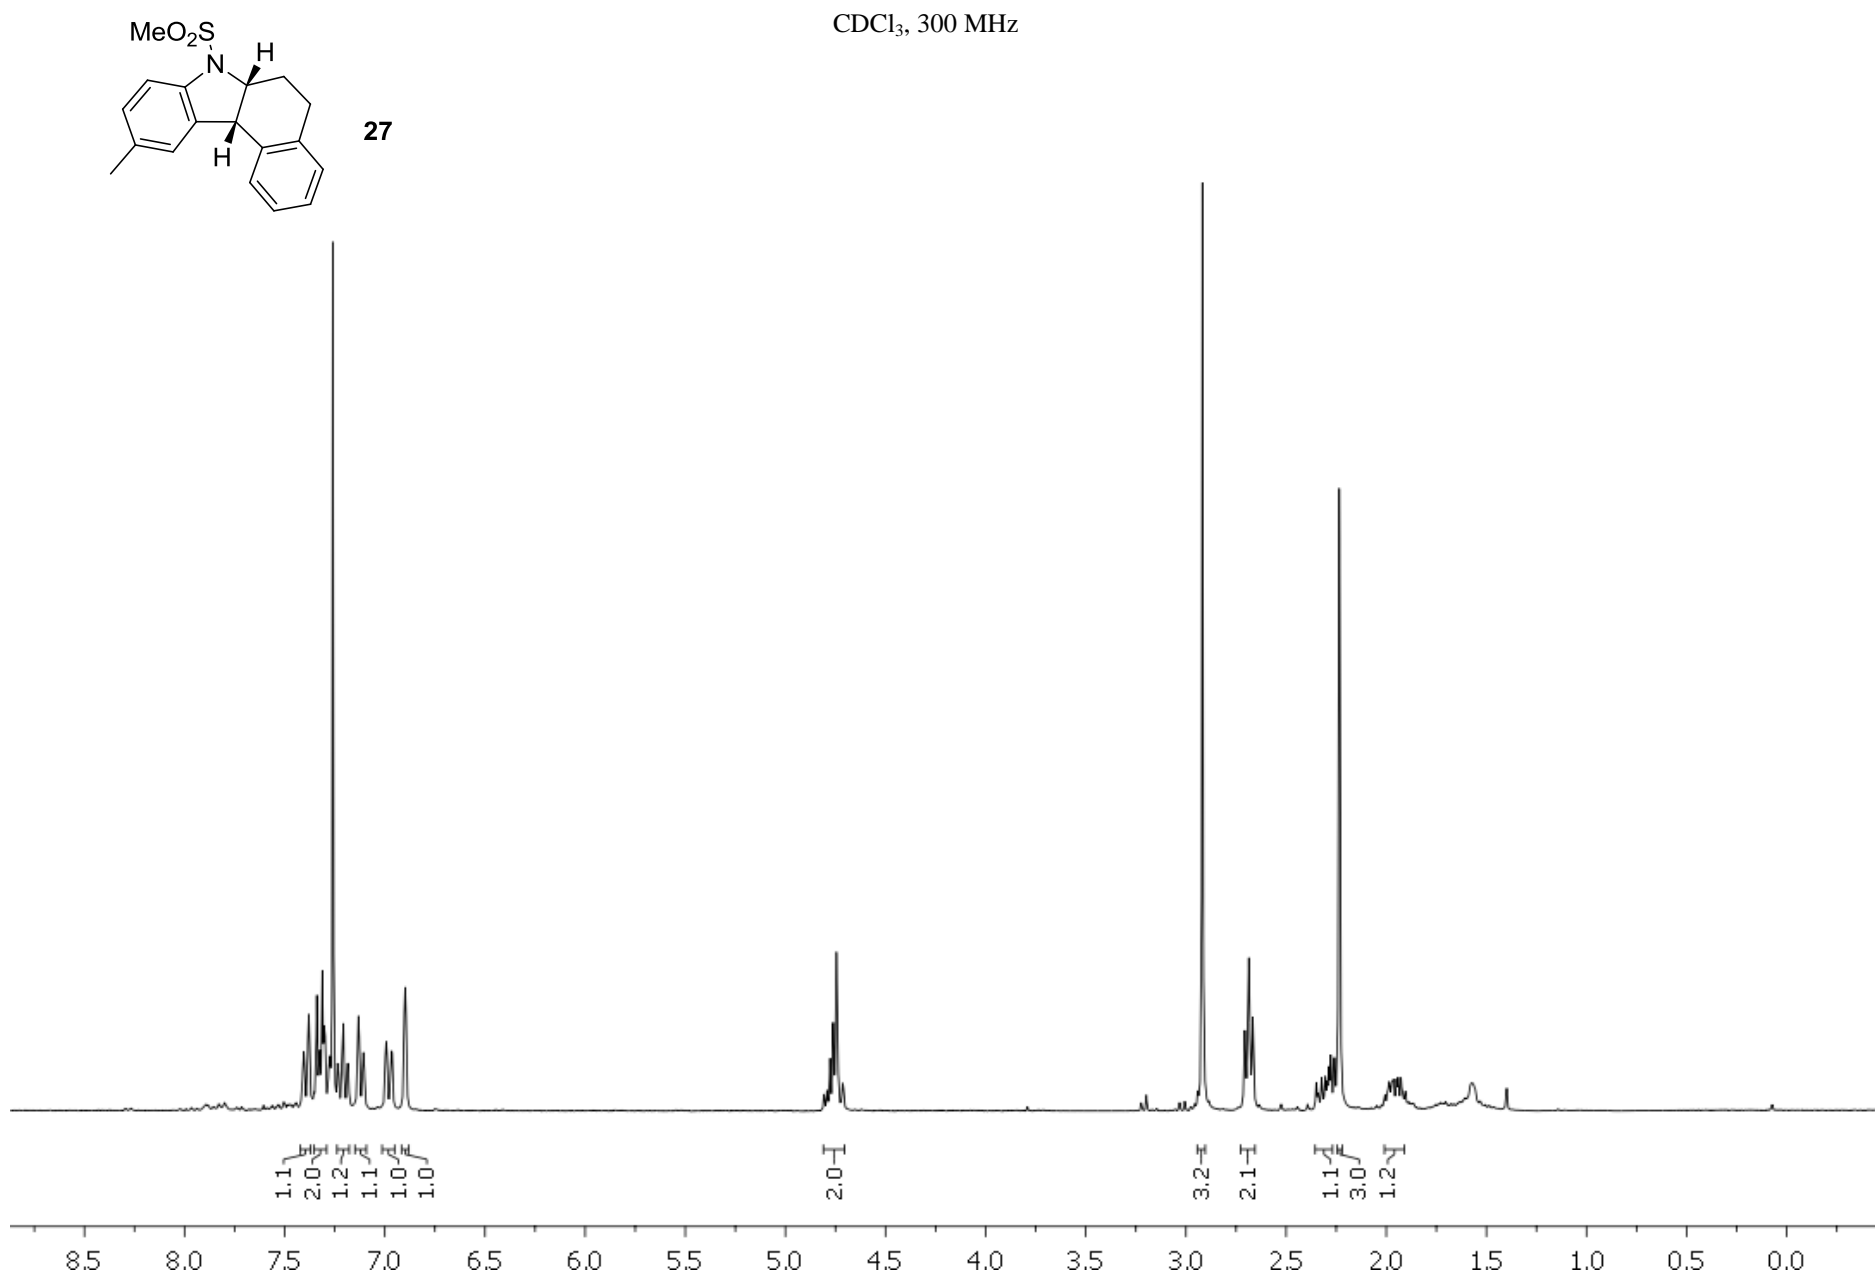

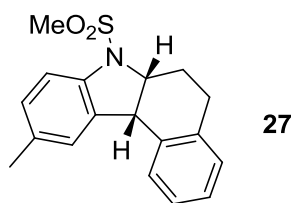

CDCl<sub>3</sub>, 75 MHz

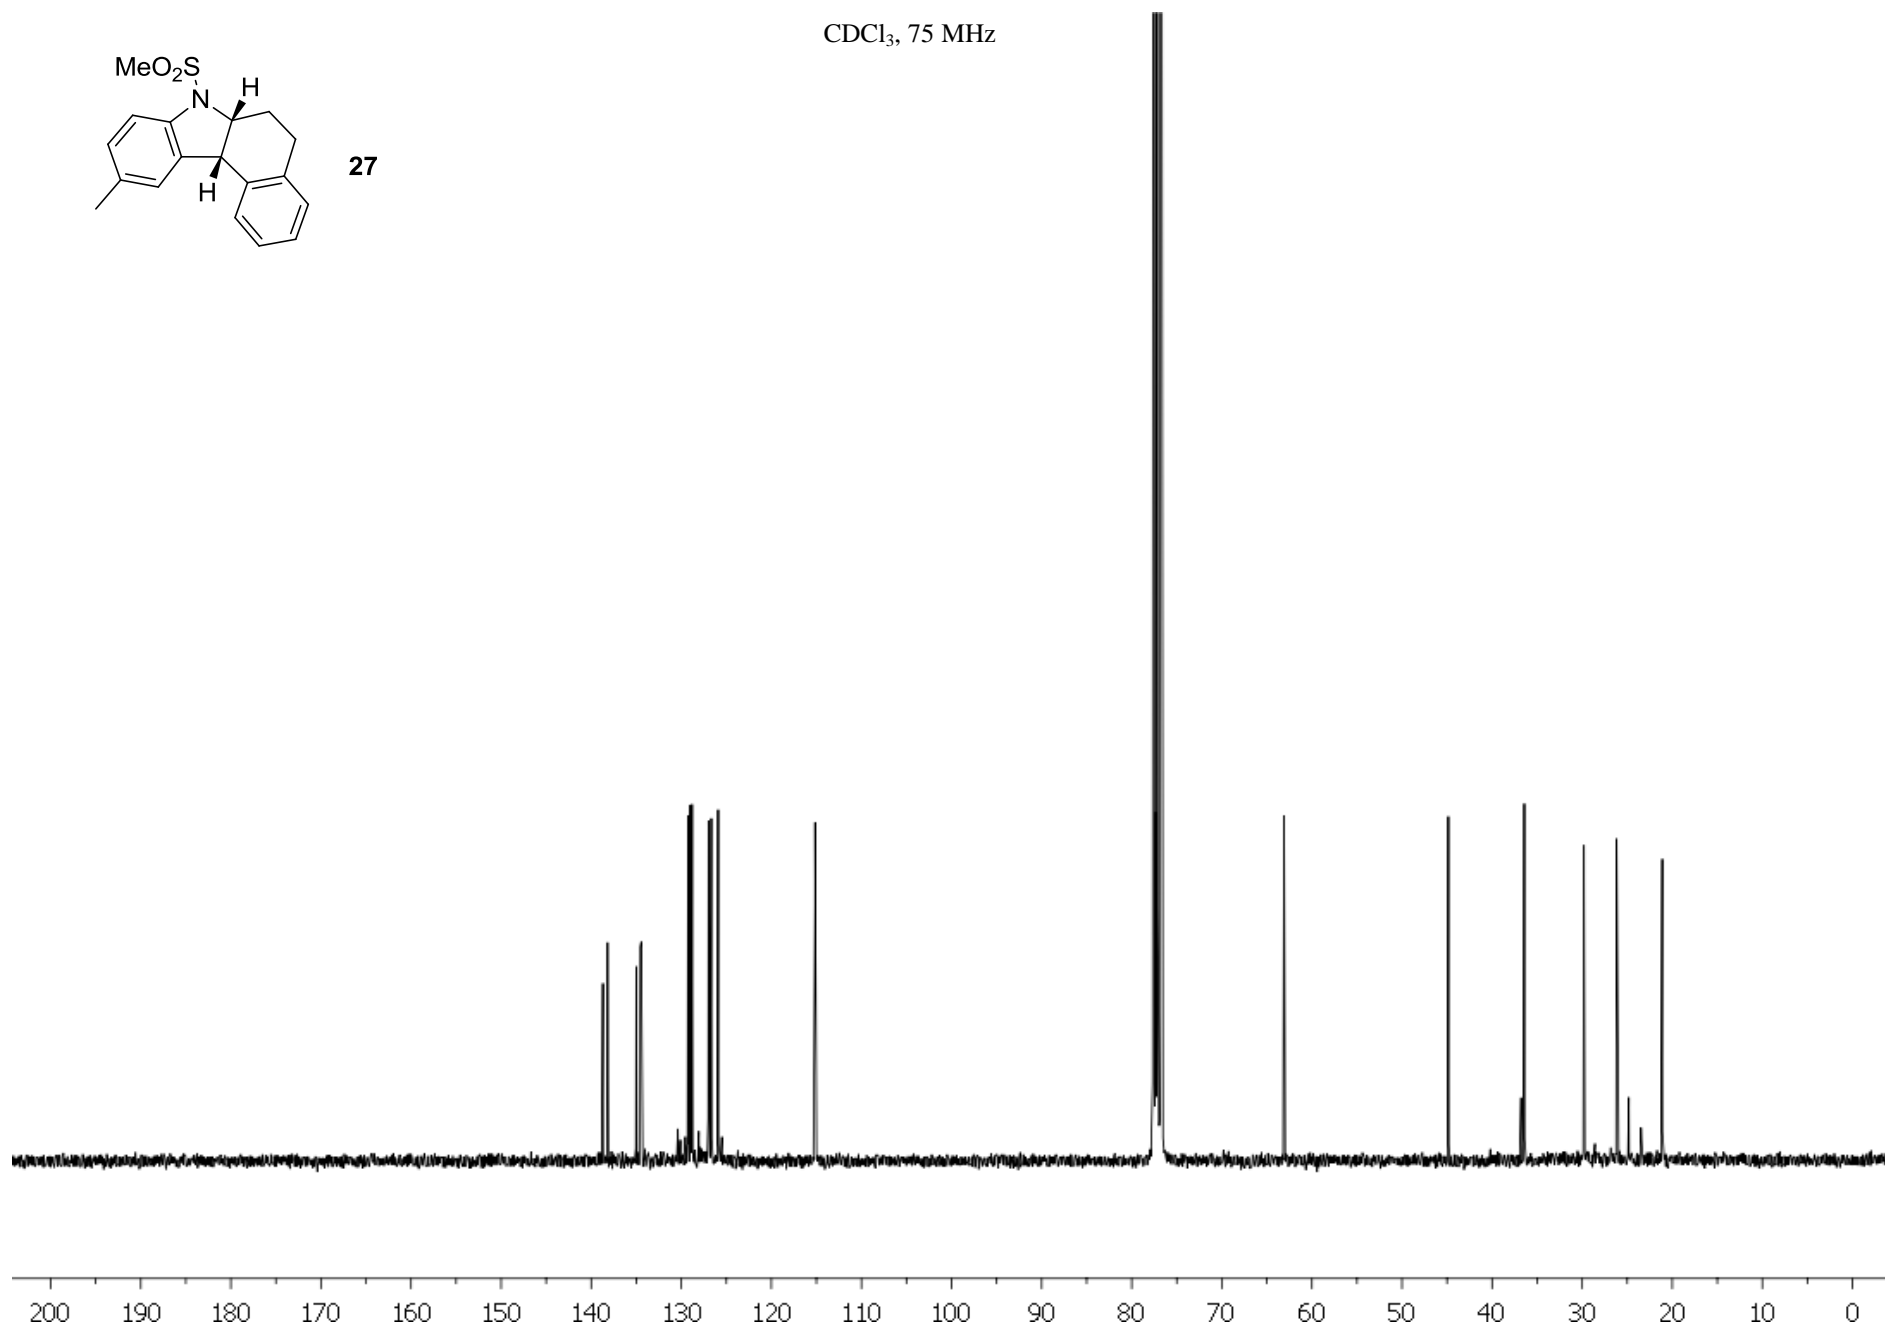

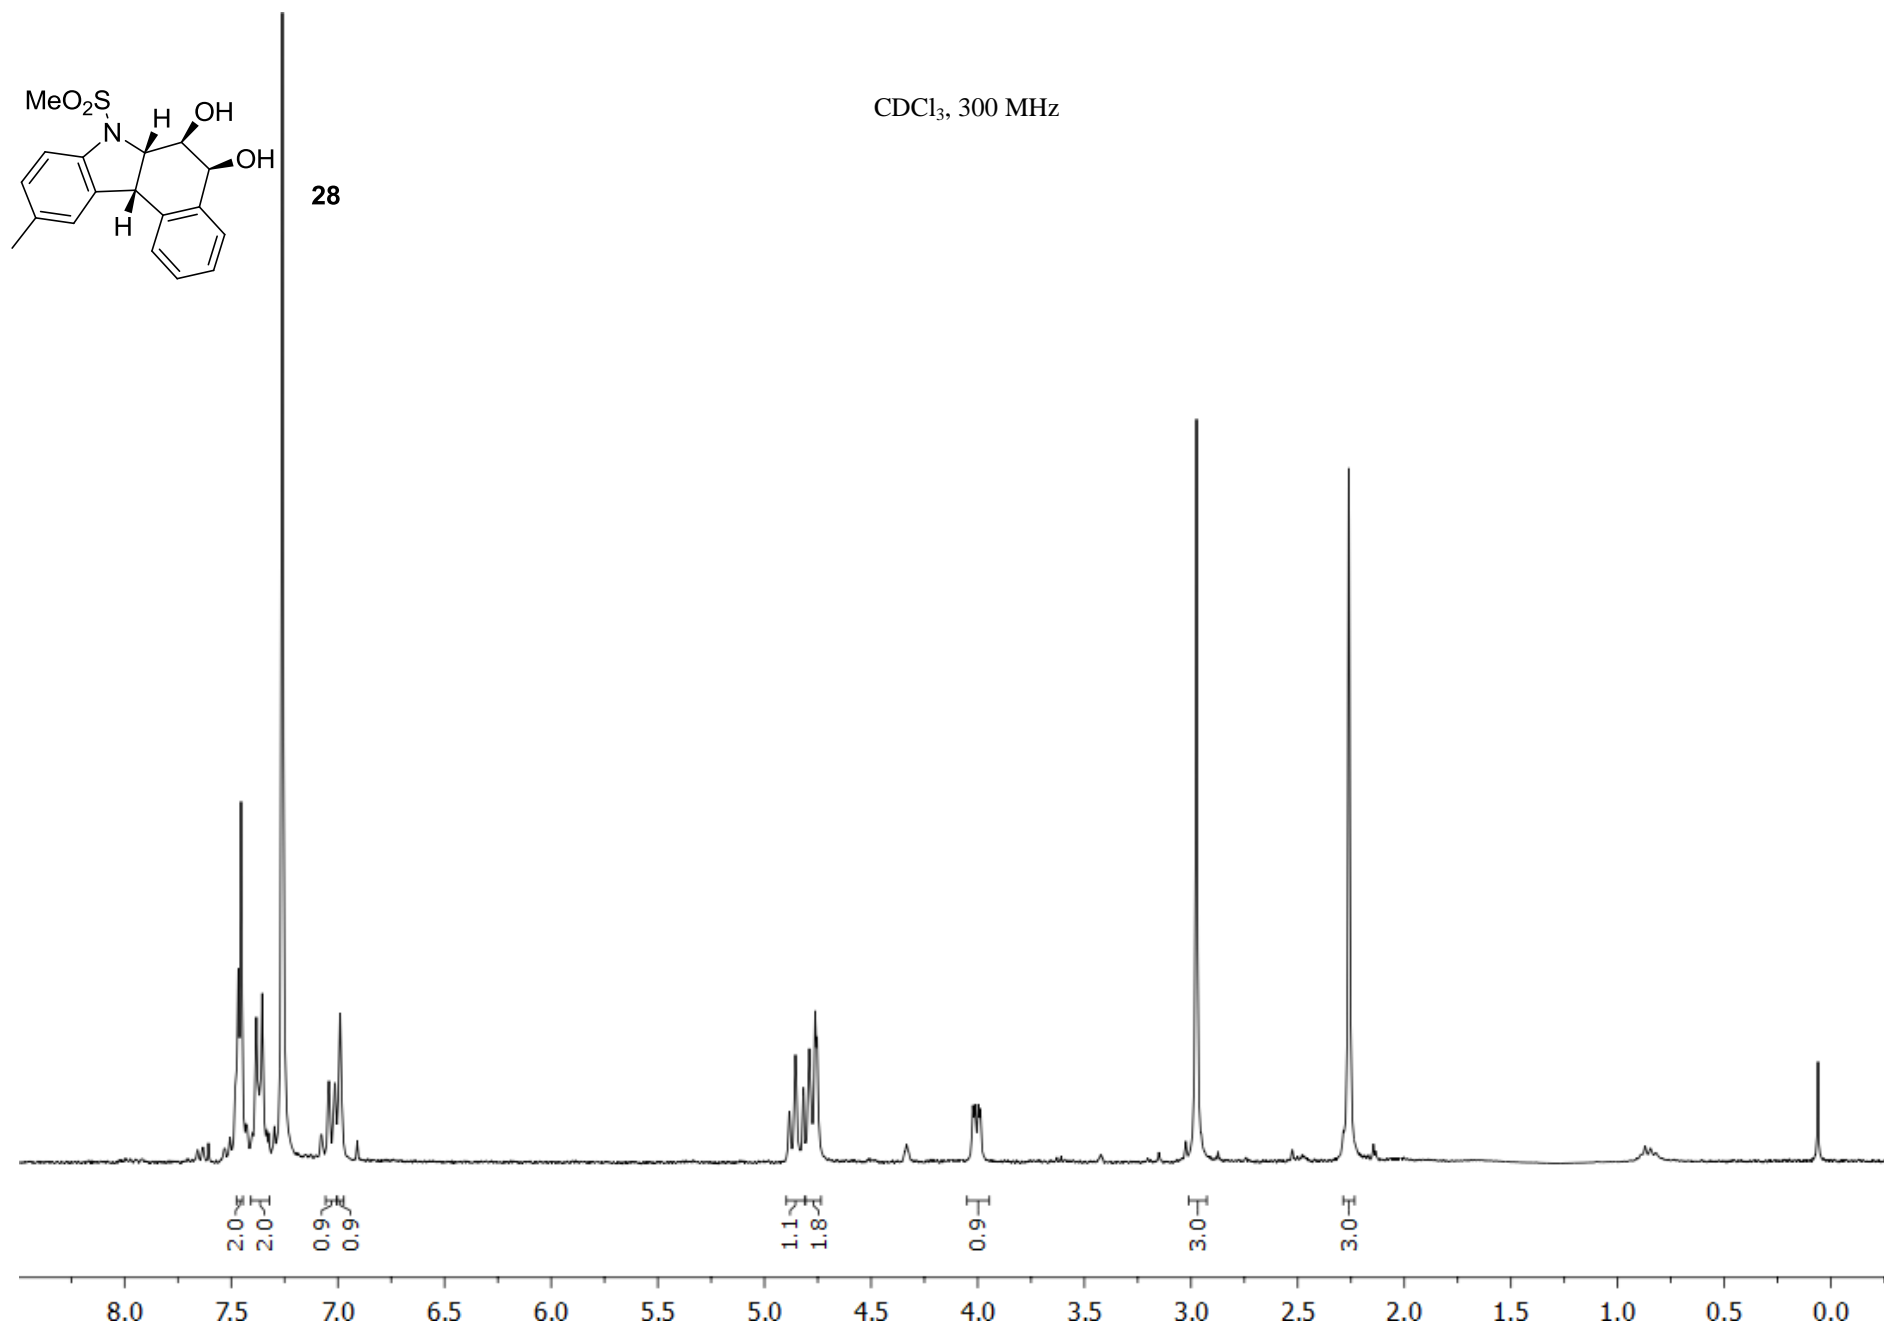



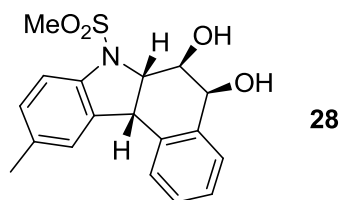

CDCl<sub>3</sub>, 75 MHz

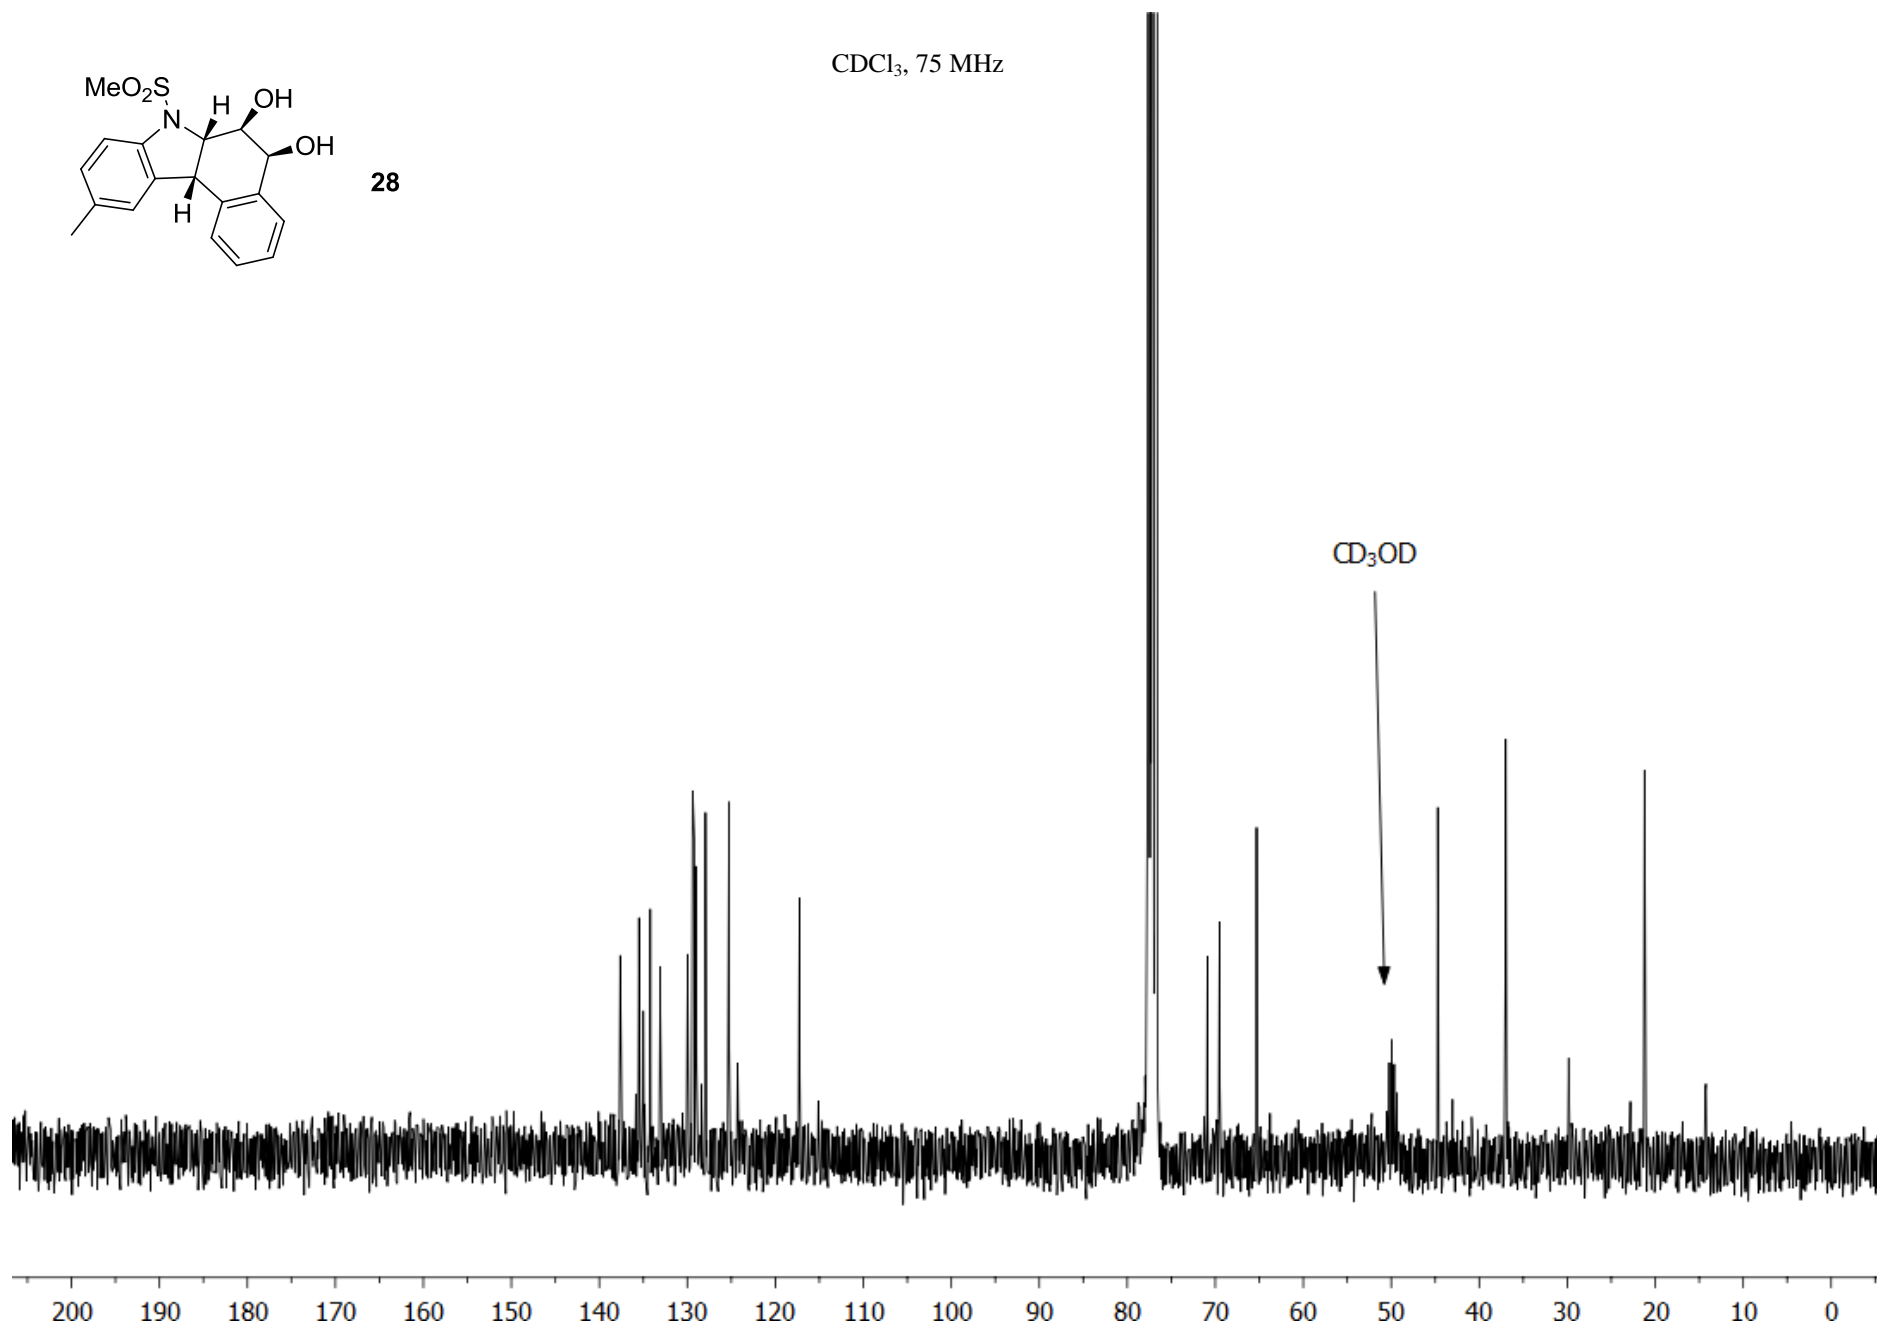

Supplement: c2sc22318j.pdf [file c2sc22318j.pdf]
